# Supplementary material for: Transcriptomic Profiling Highlights the ABA Response Role of BnSIP1-1 in Brassica napus
Source: MDPI journal article supplement (doi:10.3390/ijms241310641), 2023-06-26
Supplement: s1 [file s1]

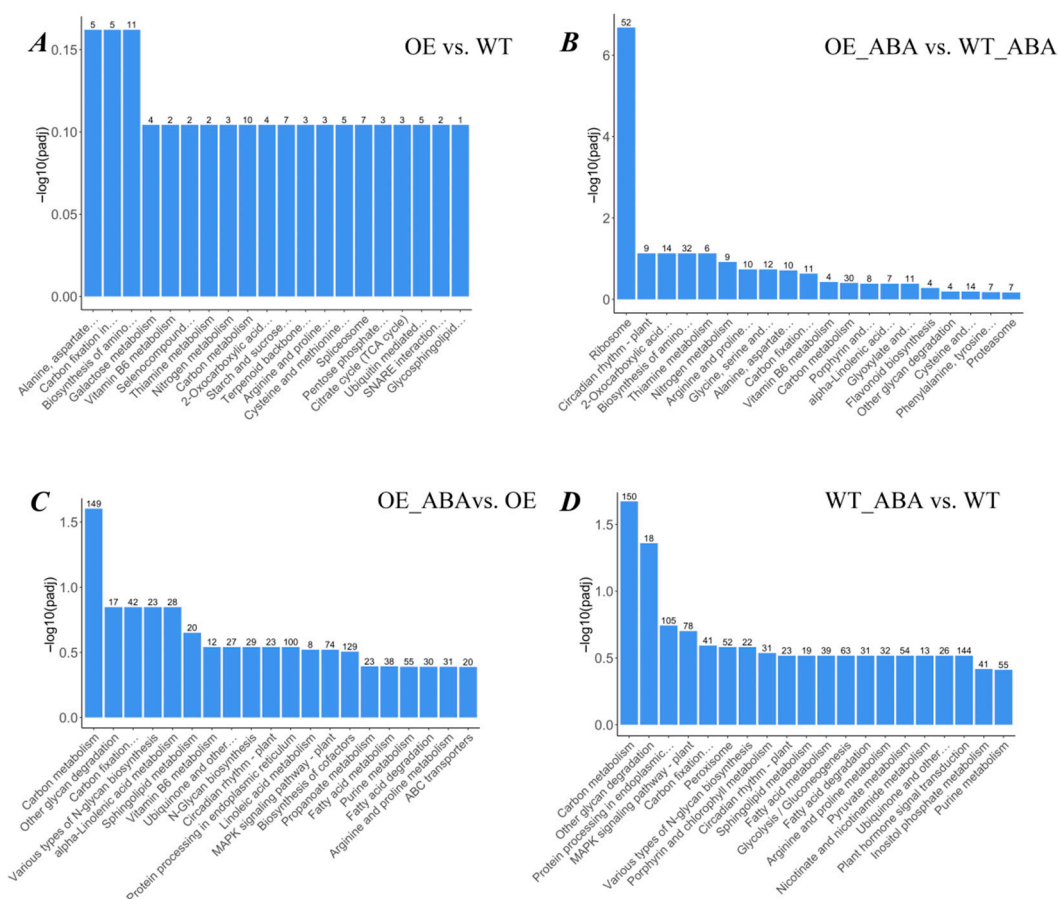

Figure S2. KEGG enrichment bar plot of DEGs among 4 comparison groups. The vertical axis represents the negative logarithm of P-value. The horizontal axis represents the name of pathway, the number among each bar represents the number of DEGs annotated to this pathway.(A)-(D) the bar plot of most enriched KEGG terms among 4 comparison groups.
