# Supplementary material for: Transcriptomic Profiling Highlights the ABA Response Role of BnSIP1-1 in Brassica napus
Source: MDPI journal article supplement (doi:10.3390/ijms241310641), 2023-06-26
Supplement: s1 [file s1]

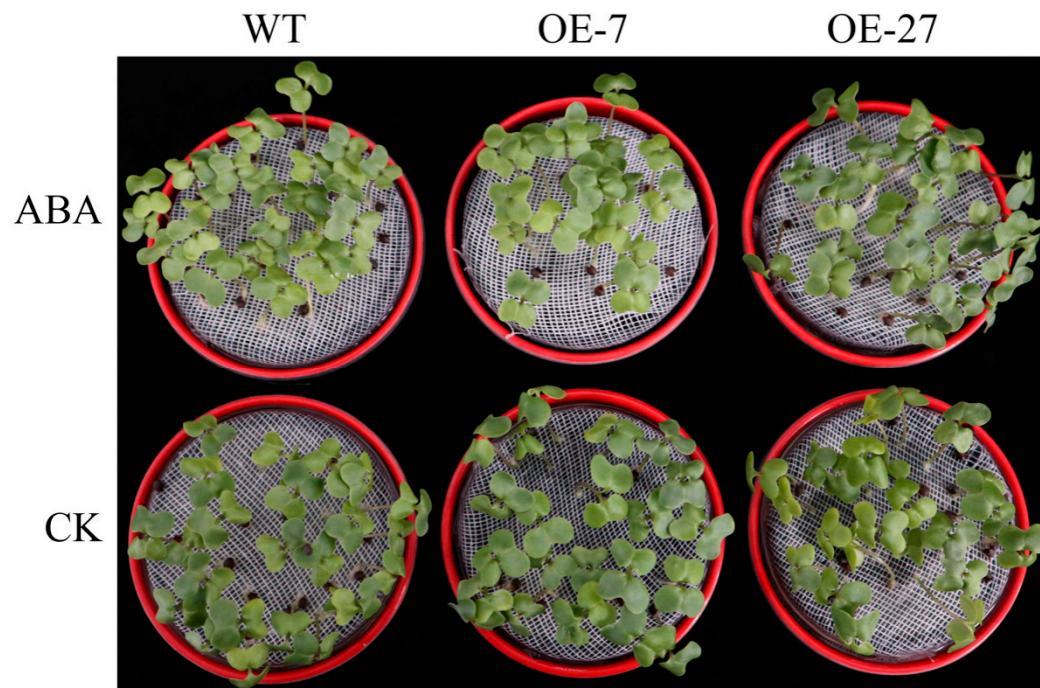

Figure S1. Growth of four-days-old wild type and *BnSIP1-1* transgenic seedlings with or without 10 mM ABA treatment. This photo was taken after ABA treatment for 6h.
