# Supplementary material for: Transcriptomic Profiling Highlights the ABA Response Role of BnSIP1-1 in Brassica napus
Source: Int J Mol Sci. 2023 Jun 26;24(13):10641. doi: 10.3390/ijms241310641 (PMC10342154; doi:10.3390/ijms241310641)
Supplement: Supplementary file 1 [file ijms-24-10641-s001.zip › supplementary_table.xlsx]

## Sheet: Table S1
Table S1a	The quality control of RNA-Seq data
Sample name	Raw reads	Clean reads	Clean bases	Error rate(%)	Q20(%)	Q30(%)	GC content(%)
WT1	48453348	45472802	6.82G	0.02	96.6	91.62	46.73
WT2	57056350	53452344	8.02G	0.02	96.73	91.88	46.45
WT3	59955494	56479226	8.47G	0.02	96.56	91.51	47.37
OE1	56300162	53097130	7.96G	0.02	96.68	91.78	46.81
OE2	55209744	51986728	7.8G	0.02	96.63	91.68	46.82
OE3	60395688	56668480	8.5G	0.02	96.81	92.06	46.52
WT_ABA1	52165692	48906604	7.34G	0.02	96.72	91.86	46.53
WT_ABA2	56307830	53059402	7.96G	0.02	96.63	91.67	46.77
WT_ABA3	53899788	50646714	7.6G	0.02	96.71	91.82	47.08
OE_ABA1	50205336	47014862	7.05G	0.02	96.6	91.63	46.26
OE_ABA2	57437084	53946146	8.09G	0.02	96.62	91.64	46.74
OE_ABA3	49669134	47533212	7.13G	0.02	96.65	91.56	46.71
Table S1b	Alignment of reads to the reference genome
Sample_name	Total reads	Total mapped	Multiple mapped	Uniquely mapped	Reads map to '+'	Reads map to '-'	Non-splice reads	Splice reads
WT1	45472802	34250556 (75.32%)	2619171 (5.76%)	31631385 (69.56%)	15828405 (34.81%)	15802980 (34.75%)	20380437 (44.82%)	11250948 (24.74%)
WT2	53452344	40210168 (75.23%)	3181975 (5.95%)	37028193 (69.27%)	18527630 (34.66%)	18500563 (34.61%)	23864529 (44.65%)	13163664 (24.63%)
WT3	56479226	42491593 (75.23%)	2886531 (5.11%)	39605062 (70.12%)	19831207 (35.11%)	19773855 (35.01%)	24502685 (43.38%)	15102377 (26.74%)
OE1	53097130	40092926 (75.51%)	2883776 (5.43%)	37209150 (70.08%)	18619713 (35.07%)	18589437 (35.01%)	23248895 (43.79%)	13960255 (26.29%)
OE2	51986728	39024170 (75.07%)	2889239 (5.56%)	36134931 (69.51%)	18085369 (34.79%)	18049562 (34.72%)	22680269 (43.63%)	13454662 (25.88%)
OE3	56668480	42789652 (75.51%)	3372905 (5.95%)	39416747 (69.56%)	19724227 (34.81%)	19692520 (34.75%)	25367304 (44.76%)	14049443 (24.79%)
WT_ABA1	48906604	36891969 (75.43%)	2205151 (4.51%)	34686818 (70.92%)	17351161 (35.48%)	17335657 (35.45%)	22463161 (45.93%)	12223657 (24.99%)
WT_ABA2	53059402	40088972 (75.55%)	2409284 (4.54%)	37679688 (71.01%)	18857723 (35.54%)	18821965 (35.47%)	23758955 (44.78%)	13920733 (26.24%)
WT_ABA3	50646714	38208161 (75.44%)	2489017 (4.91%)	35719144 (70.53%)	17869753 (35.28%)	17849391 (35.24%)	22728479 (44.88%)	12990665 (25.65%)
OE_ABA1	47014862	35047429 (74.55%)	2139623 (4.55%)	32907806 (69.99%)	16446868 (34.98%)	16460938 (35.01%)	21719578 (46.2%)	11188228 (23.8%)
OE_ABA2	53946146	40322189 (74.75%)	2471419 (4.58%)	37850770 (70.16%)	18929589 (35.09%)	18921181 (35.07%)	24220750 (44.9%)	13630020 (25.27%)
OE_ABA3	47533212	36223891 (76.21%)	2212642 (4.65%)	34011249 (71.55%)	17013031 (35.79%)	16998218 (35.76%)	21889896 (46.05%)	12121353 (25.5%)

## Sheet: Table S2
Table S2	DEGs annotated to different transcription family
Family	Gene_id	WT_group_fpkm	OE_group_fpkm	WT_ABA_group_fpkm	OE_ABA_group_fpkm	significant(OE_ABAvsOE)	significant(OE_ABAvsWT_ABA)	significant(OEvsWT)	significant(WT_ABAvsWT)	KEGG AnnotInfo	Blast swiss prot
ABI3VP1(15)	BnaA03g51860D	1.57065	1.60336	3.98689	4.00916	UP	FALSE	FALSE	UP	HSL1; B3 domain-containing transcription repressor VAL2	sp|Q5CCK4|VAL2_ARATH B3 domain-containing transcription repressor VAL2 OS=Arabidopsis thaliana GN=VAL2 PE=2 SV=1//0
	BnaA05g08190D	3.63333	3.52078	22.4579	28.8885	UP	FALSE	FALSE	UP	protein ABNORMAL SHOOT 2	sp|Q8GYJ2|Y2608_ARATH B3 domain-containing protein At2g36080 OS=Arabidopsis thaliana GN=ARF31 PE=2 SV=1//7.04052e-106
	BnaA05g27480D	1.95793	2.19649	1.64098	2.79953	UP	FALSE	FALSE	FALSE	AP2/B3-like transcriptional factor family protein	sp|Q8RYD3|Y3158_ARATH B3 domain-containing protein At3g11580 OS=Arabidopsis thaliana GN=ARF32 PE=2 SV=1//3.05114e-129
	BnaA07g35020D	9.69351	10.3736	21.2023	20.8927	UP	FALSE	FALSE	UP	SYP52; syntaxin-52; K08503 syntaxin of plants SYP5	sp|Q94KK7|SYP52_ARATH Syntaxin-52 OS=Arabidopsis thaliana GN=SYP52 PE=1 SV=1//9.95384e-153
	BnaA10g00810D	3.06648	3.81254	9.43846	10.471	UP	FALSE	FALSE	UP	NGA3; B3 domain-containing transcription factor NGA3	sp|Q9MAN1|NGA3_ARATH B3 domain-containing transcription factor NGA3 OS=Arabidopsis thaliana GN=NGA3 PE=2 SV=1//3.14829e-177
	BnaAnng07660D	1.19975	1.79193	3.37308	3.82481	UP	FALSE	FALSE	UP	protein ABNORMAL SHOOT 2	sp|Q8GYJ2|Y2608_ARATH B3 domain-containing protein At2g36080 OS=Arabidopsis thaliana GN=ARF31 PE=2 SV=1//3.97251e-117
	BnaAnng24200D	0.328443	0.600507	1.49678	1.60573	UP	FALSE	FALSE	UP	B3 domain-containing protein REM20	sp|Q8LAV5|REM20_ARATH B3 domain-containing protein REM20 OS=Arabidopsis thaliana GN=REM20 PE=2 SV=1//1.32681e-94
	BnaC01g44850D	4.122	4.00694	3.45038	5.3594	UP	FALSE	FALSE	FALSE	AP2/B3-like transcriptional factor family protein	sp|Q8RYD3|Y3158_ARATH B3 domain-containing protein At3g11580 OS=Arabidopsis thaliana GN=ARF32 PE=2 SV=1//3.76183e-100
	BnaC03g39800D	0.922564	1.39925	0.711224	1.72508	UP	FALSE	FALSE	FALSE	transcriptional factor B3 family protein	sp|Q9LSP6|Y3701_ARATH B3 domain-containing protein At3g17010 OS=Arabidopsis thaliana GN=At3g17010 PE=2 SV=1//1.85309e-87
	BnaC04g09240D	3.07418	2.16294	3.30467	5.29016	UP	FALSE	FALSE	UP	protein ABNORMAL SHOOT 2	sp|Q8GYJ2|Y2608_ARATH B3 domain-containing protein At2g36080 OS=Arabidopsis thaliana GN=ARF31 PE=2 SV=1//5.12287e-111
	BnaC05g00870D	1.83724	2.20206	4.87949	4.26765	UP	FALSE	FALSE	UP	NGA3; B3 domain-containing transcription factor NGA3	sp|Q9MAN1|NGA3_ARATH B3 domain-containing transcription factor NGA3 OS=Arabidopsis thaliana GN=NGA3 PE=2 SV=1//1.64125e-151
	BnaC05g12720D	1.31673	1.26363	0.0749477	0.194165	FALSE	FALSE	FALSE	DOWN	AP2/B3-like transcriptional factor family protein	sp|Q9FX77|Y1664_ARATH B3 domain-containing protein At1g16640 OS=Arabidopsis thaliana GN=At1g16640 PE=1 SV=1//1.04309e-48
	BnaC05g20100D	0.196765	0.77307	1.31986	1.52962	UP	FALSE	FALSE	UP	transcriptional factor B3 family protein	sp|Q84WP3|REM17_ARATH B3 domain-containing protein REM17 OS=Arabidopsis thaliana GN=REM17 PE=2 SV=2//3.64851e-22
	BnaC08g02890D	1.10028	0.842315	1.09089	1.96917	UP	FALSE	FALSE	FALSE	B3 domain-containing protein	sp|Q9XIB4|Y1475_ARATH B3 domain-containing protein At1g49475 OS=Arabidopsis thaliana GN=At1g49475 PE=2 SV=2//8.09769e-63
	BnaCnng32580D	3.69373	4.92577	0.503393	1.2983	DOWN	FALSE	FALSE	DOWN	VDD; putative transcription factor VERDANDI	sp|Q9FJG2|Y5800_ARATH B3 domain-containing protein At5g18000 OS=Arabidopsis thaliana GN=At5g18000 PE=2 SV=1//1.72639e-38
Alfin-like(6)	BnaA01g31130D	19.1043	18.9374	27.2149	33.8715	UP	FALSE	FALSE	UP	AL2; alfin-like 2 protein	sp|Q9SRM4|ALFL2_ARATH PHD finger protein ALFIN-LIKE 2 OS=Arabidopsis thaliana GN=AL2 PE=1 SV=1//2.07054e-130
	BnaA06g34120D	0.500941	1.07809	0.0494818	0.0466228	DOWN	FALSE	FALSE	FALSE	AL6; protein alfin-like 6	sp|Q8S8M9|ALFL6_ARATH PHD finger protein ALFIN-LIKE 6 OS=Arabidopsis thaliana GN=AL6 PE=2 SV=1//1.07255e-52
	BnaA09g04340D	16.0755	17.2264	26.82	27.7212	UP	FALSE	FALSE	UP	AL4; PHD finger protein ALFIN-LIKE 4	sp|O81488|ALFL4_ARATH PHD finger protein ALFIN-LIKE 4 OS=Arabidopsis thaliana GN=AL4 PE=1 SV=2//2.18262e-107
	BnaA09g57040D	14.655	14.4291	24.1297	25.448	UP	FALSE	FALSE	UP	AL7; protein alfin-like 7	sp|Q8LA16|ALFL7_ARATH PHD finger protein ALFIN-LIKE 7 OS=Arabidopsis thaliana GN=AL7 PE=1 SV=1//1.12552e-126
	BnaC03g37100D	16.7065	16.2854	32.3663	32.5309	UP	FALSE	FALSE	UP	AL2; alfin-like 2 protein	sp|Q9SRM4|ALFL2_ARATH PHD finger protein ALFIN-LIKE 2 OS=Arabidopsis thaliana GN=AL2 PE=1 SV=1//1.15978e-135
	BnaC09g03760D	22.8604	21.4855	36.2567	38.4821	UP	FALSE	FALSE	UP	AL4; PHD finger protein ALFIN-LIKE 4	sp|O81488|ALFL4_ARATH PHD finger protein ALFIN-LIKE 4 OS=Arabidopsis thaliana GN=AL4 PE=1 SV=2//5.10092e-107
AP2-EREBP(134)	BnaA01g00290D	0.919042	2.39478	0.157013	0.410739	DOWN	FALSE	UP	DOWN	ANT; AP2-like ethylene-responsive transcription factor ANT; K09285 AP2-like factor, ANT lineage	sp|Q38914|ANT_ARATH AP2-like ethylene-responsive transcription factor ANT OS=Arabidopsis thaliana GN=ANT PE=1 SV=2//0
	BnaA01g00710D	1.31111	3.05749	10.3939	16.8828	UP	FALSE	FALSE	UP	RAP2.10; ethylene-responsive transcription factor RAP2-10; K09286 EREBP-like factor	sp|Q9SW63|RA210_ARATH Ethylene-responsive transcription factor RAP2-10 OS=Arabidopsis thaliana GN=RAP2-10 PE=2 SV=1//5.79787e-79
	BnaA01g02720D	0.412806	0.381662	106.322	127.563	UP	FALSE	FALSE	UP	RRTF1; ethylene-responsive transcription factor ERF109	sp|Q9SZ06|EF109_ARATH Ethylene-responsive transcription factor ERF109 OS=Arabidopsis thaliana GN=ERF109 PE=1 SV=1//1.42661e-85
	BnaA01g28970D	4.42206	3.92573	18.9363	19.6576	UP	FALSE	FALSE	UP	ERF4; ethylene-responsive transcription factor 4; K09286 EREBP-like factor	sp|O80340|ERF78_ARATH Ethylene-responsive transcription factor 4 OS=Arabidopsis thaliana GN=ERF4 PE=1 SV=1//3.20093e-61
	BnaA01g34730D	2.5278	6.58613	0.747004	2.30748	DOWN	UP	FALSE	FALSE	AP2; Floral homeotic protein APETALA 2; K09284 AP2-like factor, euAP2 lineage	sp|P47927|AP2_ARATH Floral homeotic protein APETALA 2 OS=Arabidopsis thaliana GN=AP2 PE=1 SV=1//1.16391e-142
	BnaA01g34910D	0.562605	0.230862	7.91654	30.9274	UP	UP	FALSE	UP	ERF6; ethylene responsive element binding factor 6; K09286 EREBP-like factor	sp|Q8VZ91|EF103_ARATH Ethylene-responsive transcription factor 6 OS=Arabidopsis thaliana GN=ERF6 PE=2 SV=2//4.63422e-103
	BnaA02g08130D	8.33673	8.21439	7.56876	13.5633	UP	UP	FALSE	UP	AIL5; AP2-like ethylene-responsive transcription factor AIL5; K09285 AP2-like factor, ANT lineage	sp|Q6PQQ3|AIL5_ARATH AP2-like ethylene-responsive transcription factor AIL5 OS=Arabidopsis thaliana GN=AIL5 PE=2 SV=2//0
	BnaA02g14040D	0.256078	0.31385	6.13603	7.08827	UP	FALSE	FALSE	UP	RAV2; AP2-EREBP family, RAVE subfamily protein RAV2; K09287 RAV-like factor	sp|P82280|RAV2_ARATH AP2/ERF and B3 domain-containing transcription repressor RAV2 OS=Arabidopsis thaliana GN=RAV2 PE=2 SV=1//6.23626e-177
	BnaA02g16050D	0.456967	0.48827	0.934813	2.57318	UP	UP	FALSE	UP	AP2-like ethylene-responsive transcription factor AIL1; K09285 AP2-like factor, ANT lineage	sp|Q1PFE1|AIL1_ARATH AP2-like ethylene-responsive transcription factor AIL1 OS=Arabidopsis thaliana GN=AIL1 PE=2 SV=1//0
	BnaA02g17250D	0.0787311	0.192468	5.16179	5.78374	UP	FALSE	FALSE	UP	dehydration-responsive element-binding protein 2D	sp|Q9LQZ2|DRE2D_ARATH Dehydration-responsive element-binding protein 2D OS=Arabidopsis thaliana GN=DREB2D PE=2 SV=1//8.74998e-107
	BnaA02g25110D	1.6168	0.264955	9.02224	22.3028	UP	UP	DOWN	UP	ERF2; ethylene-responsive transcription factor 2; K14517 ethylene-responsive transcription factor 2	sp|O80338|EF101_ARATH Ethylene-responsive transcription factor 2 OS=Arabidopsis thaliana GN=ERF2 PE=2 SV=1//8.44355e-92
	BnaA02g32120D	3.71448	4.11943	0.0328134	0.226681	DOWN	FALSE	FALSE	DOWN	ethylene-responsive transcription factor ERF003	sp|Q94AW5|ERF03_ARATH Ethylene-responsive transcription factor ERF003 OS=Arabidopsis thaliana GN=ERF003 PE=2 SV=1//3.01136e-82
	BnaA02g34370D	0.242849	0.506633	82.2516	110.432	UP	FALSE	FALSE	UP	ABR1; ethylene-responsive transcription factor ABR1	sp|Q9FGF8|ABR1_ARATH Ethylene-responsive transcription factor ABR1 OS=Arabidopsis thaliana GN=ABR1 PE=2 SV=1//4.32133e-120
	BnaA03g02990D	0.535781	0.689982	0.884088	1.75788	UP	FALSE	FALSE	UP	AIL6; AP2-like ethylene-responsive transcription factor AIL6; K09285 AP2-like factor, ANT lineage	sp|Q52QU2|AIL6_ARATH AP2-like ethylene-responsive transcription factor AIL6 OS=Arabidopsis thaliana GN=AIL6 PE=2 SV=1//1.42248e-157
	BnaA03g04290D	1.16273	2.3509	155.839	273.722	UP	UP	FALSE	UP	Rap2.6L; ethylene-responsive transcription factor ERF113	sp|Q9LYU3|EF113_ARATH Ethylene-responsive transcription factor ERF113 OS=Arabidopsis thaliana GN=ERF113 PE=2 SV=1//8.23808e-61
	BnaA03g16280D	0.382609	0.459376	1.7111	0.854052	FALSE	FALSE	FALSE	UP	ERF38; ethylene-responsive transcription factor ERF038	sp|Q9ZQP3|ERF38_ARATH Ethylene-responsive transcription factor ERF038 OS=Arabidopsis thaliana GN=ERF038 PE=2 SV=1//6.50473e-79
	BnaA03g19580D	2.24878	1.90037	2.76788	3.07643	UP	FALSE	FALSE	UP	AP2-like ethylene-responsive transcription factor; K09285 AP2-like factor, ANT lineage	sp|Q8GWK2|AP2L4_ARATH AP2-like ethylene-responsive transcription factor At2g41710 OS=Arabidopsis thaliana GN=At2g41710 PE=2 SV=2//0
	BnaA03g31510D	0.275537	0.35386	6.605	9.08635	UP	FALSE	FALSE	UP	DREB2B; dehydration-responsive element-binding protein 2B; K09286 EREBP-like factor	sp|O82133|DRE2B_ARATH Dehydration-responsive element-binding protein 2B OS=Arabidopsis thaliana GN=DREB2B PE=2 SV=1//5.9217e-42
	BnaA03g33790D	20.3834	18.9877	15.9541	27.5794	UP	UP	FALSE	FALSE	ERF4; ethylene-responsive transcription factor 4; K09286 EREBP-like factor	sp|O80340|ERF78_ARATH Ethylene-responsive transcription factor 4 OS=Arabidopsis thaliana GN=ERF4 PE=1 SV=1//3.31555e-71
	BnaA03g40370D	5.98084	5.20905	5.51284	7.18992	UP	FALSE	FALSE	FALSE	ethylene-responsive transcription factor ERF107	sp|Q9FKG2|EF107_ARATH Ethylene-responsive transcription factor ERF107 OS=Arabidopsis thaliana GN=ERF107 PE=2 SV=1//7.49899e-102
	BnaA03g40380D	0.560228	0.201724	2.13645	1.91806	UP	FALSE	FALSE	UP	ERF104; ethylene-responsive transcription factor ERF104; K09286 EREBP-like factor	sp|Q9FKG1|EF104_ARATH Ethylene-responsive transcription factor ERF104 OS=Arabidopsis thaliana GN=ERF104 PE=1 SV=1//2.76113e-104
	BnaA03g53830D	1.44677	1.5925	1.69747	2.13872	UP	FALSE	FALSE	UP	AP2; Floral homeotic protein APETALA 2; K09284 AP2-like factor, euAP2 lineage	sp|P47927|AP2_ARATH Floral homeotic protein APETALA 2 OS=Arabidopsis thaliana GN=AP2 PE=1 SV=1//0
	BnaA03g53850D	2.74386	2.99011	11.3176	11.0563	UP	FALSE	FALSE	UP	RAP2.10; ethylene-responsive transcription factor RAP2-10; K09286 EREBP-like factor	sp|Q9SW63|RA210_ARATH Ethylene-responsive transcription factor RAP2-10 OS=Arabidopsis thaliana GN=RAP2-10 PE=2 SV=1//2.80463e-76
	BnaA04g25900D	0.23995	0.0710486	0.625444	1.54974	UP	FALSE	FALSE	UP	ERF13; ethylene-responsive transcription factor 13	sp|Q8L9K1|ERF99_ARATH Ethylene-responsive transcription factor 13 OS=Arabidopsis thaliana GN=ERF13 PE=2 SV=2//1.84098e-106
	BnaA04g27050D	0.951054	1.35244	327.693	375.905	UP	FALSE	FALSE	UP	HRE2; ethylene-responsive transcription factor ERF071	sp|O22259|ERF71_ARATH Ethylene-responsive transcription factor ERF071 OS=Arabidopsis thaliana GN=ERF071 PE=2 SV=1//7.46597e-46
	BnaA04g29310D	1.8632	1.35232	6.81658	8.62509	UP	FALSE	FALSE	UP	DREB2C; dehydration-responsive element-binding protein 2C	sp|Q8LFR2|DRE2C_ARATH Dehydration-responsive element-binding protein 2C OS=Arabidopsis thaliana GN=DREB2C PE=2 SV=2//4.0424e-90
	BnaA05g23420D	0.339616	0.442224	6.21119	8.09975	UP	FALSE	FALSE	UP	ethylene-responsive transcription factor ERF036	sp|Q9LU18|ERF36_ARATH Ethylene-responsive transcription factor ERF036 OS=Arabidopsis thaliana GN=ERF036 PE=2 SV=2//8.10709e-49
	BnaA05g24390D	16.2946	13.4692	165.835	208.928	UP	FALSE	FALSE	UP	ERF4; ethylene-responsive transcription factor 4; K09286 EREBP-like factor	sp|O80340|ERF78_ARATH Ethylene-responsive transcription factor 4 OS=Arabidopsis thaliana GN=ERF4 PE=1 SV=1//1.52569e-69
	BnaA05g25200D	20.7435	21.7328	44.5225	37.2612	UP	FALSE	FALSE	UP	RAP2.2; ethylene-responsive transcription factor RAP2-2; K09286 EREBP-like factor	sp|Q9LUM4|RAP22_ARATH Ethylene-responsive transcription factor RAP2-2 OS=Arabidopsis thaliana GN=RAP2-2 PE=1 SV=2//3.02584e-137
	BnaA05g27930D	0.415854	1.02987	57.4064	70.0008	UP	FALSE	FALSE	UP	DREB2B; dehydration-responsive element-binding protein 2B; K09286 EREBP-like factor	sp|O82133|DRE2B_ARATH Dehydration-responsive element-binding protein 2B OS=Arabidopsis thaliana GN=DREB2B PE=2 SV=1//1.58196e-69
	BnaA06g01090D	0.963032	0.686656	38.6976	45.8566	UP	FALSE	FALSE	UP	ERF8; ethylene-responsive transcription factor 8	sp|Q9MAI5|ERF79_ARATH Ethylene-responsive transcription factor 8 OS=Arabidopsis thaliana GN=ERF8 PE=2 SV=1//7.67343e-27
	BnaA06g02670D	15.3187	16.6751	220.713	199.27	UP	FALSE	FALSE	UP	ERF3; ethylene-responsive transcription factor 3; K09286 EREBP-like factor	sp|O80339|ERF82_ARATH Ethylene-responsive transcription factor 3 OS=Arabidopsis thaliana GN=ERF3 PE=1 SV=1//1.33643e-39
	BnaA06g23710D	0.187594	0.337389	16.5503	36.4536	UP	UP	FALSE	UP	ABR1; ethylene-responsive transcription factor ABR1	sp|Q9FGF8|ABR1_ARATH Ethylene-responsive transcription factor ABR1 OS=Arabidopsis thaliana GN=ABR1 PE=2 SV=1//3.19869e-126
	BnaA06g35500D	2.24847	0.705321	7.84134	21.2954	UP	UP	DOWN	UP	ERF2; ethylene-responsive transcription factor 2; K14517 ethylene-responsive transcription factor 2	sp|O80338|EF101_ARATH Ethylene-responsive transcription factor 2 OS=Arabidopsis thaliana GN=ERF2 PE=2 SV=1//3.29497e-73
	BnaA06g40170D	0.192545	0.289487	0.630914	1.42015	UP	FALSE	FALSE	UP	ERF5; ethylene-responsive transcription factor 5; K09286 EREBP-like factor	sp|O80341|EF102_ARATH Ethylene-responsive transcription factor 5 OS=Arabidopsis thaliana GN=ERF5 PE=2 SV=1//2.01117e-88
	BnaA07g08440D	1.25314	1.02502	19.0534	27.0265	UP	FALSE	FALSE	UP	ERF11; ethylene-responsive transcription factor 11	sp|Q9C5I3|ERF76_ARATH Ethylene-responsive transcription factor 11 OS=Arabidopsis thaliana GN=ERF11 PE=2 SV=1//5.89047e-38
	BnaA07g08450D	0.142482	0.186642	1.57327	2.6099	UP	FALSE	FALSE	UP	ERF12; ethylene-responsive transcription factor 12	sp|Q94ID6|ERF81_ARATH Ethylene-responsive transcription factor 12 OS=Arabidopsis thaliana GN=ERF12 PE=2 SV=1//2.57987e-74
	BnaA07g12040D	18.6464	13.927	201.059	146.214	UP	DOWN	FALSE	UP	DEAR2; ethylene-responsive transcription factor ERF010	sp|Q9FH94|ERF10_ARATH Ethylene-responsive transcription factor ERF010 OS=Arabidopsis thaliana GN=ERF010 PE=2 SV=1//5.22127e-82
	BnaA07g12050D	1.41544	2.09171	0.0472286	0.219466	DOWN	FALSE	FALSE	DOWN	TOE3; target of early activation tagged 3; K09284 AP2-like factor, euAP2 lineage	sp|Q9FH95|TOE3_ARATH AP2-like ethylene-responsive transcription factor TOE3 OS=Arabidopsis thaliana GN=TOE3 PE=2 SV=1//3.01521e-165
	BnaA07g20720D	5.10763	5.661	0.475153	1.2586	DOWN	FALSE	FALSE	DOWN	RAP2.4; ethylene-responsive transcription factor RAP2-4; K09286 EREBP-like factor	sp|Q8H1E4|RAP24_ARATH Ethylene-responsive transcription factor RAP2-4 OS=Arabidopsis thaliana GN=RAP2-4 PE=1 SV=1//3.10376e-116
	BnaA07g29400D	2.30539	2.72417	801.459	952.943	UP	FALSE	FALSE	UP	ERF/AP2 transcription factor family protein DREB A-5	sp|Q9C9I8|ERF20_ARATH Ethylene-responsive transcription factor ERF020 OS=Arabidopsis thaliana GN=ERF020 PE=2 SV=1//4.62532e-74
	BnaA07g35130D	2.71995	3.27094	7.09741	7.59483	UP	FALSE	FALSE	UP	AP2-like ethylene-responsive transcription factor WRI4; K09285 AP2-like factor, ANT lineage	sp|A0JPZ8|AP2L3_ARATH AP2-like ethylene-responsive transcription factor At1g79700 OS=Arabidopsis thaliana GN=At1g79700 PE=2 SV=1//2.17498e-125
	BnaA07g38140D	0.318969	0.501753	66.9104	53.4601	UP	FALSE	FALSE	UP	CRF6; ethylene-responsive transcription factor CRF6	sp|Q9M374|CRF6_ARATH Ethylene-responsive transcription factor CRF6 OS=Arabidopsis thaliana GN=CRF6 PE=1 SV=1//3.14086e-75
	BnaA08g01300D	1.89249	1.39272	9.70329	16.5475	UP	UP	FALSE	UP	ERF4; ethylene-responsive transcription factor 4; K09286 EREBP-like factor	sp|O80340|ERF78_ARATH Ethylene-responsive transcription factor 4 OS=Arabidopsis thaliana GN=ERF4 PE=1 SV=1//8.68288e-41
	BnaA08g04090D	1.32993	1.21203	3.5332	4.21385	UP	FALSE	FALSE	UP	RAP2.1; ethylene-responsive transcription factor RAP2-1; K09286 EREBP-like factor	sp|Q8LC30|RAP21_ARATH Ethylene-responsive transcription factor RAP2-1 OS=Arabidopsis thaliana GN=RAP2-1 PE=2 SV=1//3.83419e-61
	BnaA08g08300D	0.980468	0.808747	8.52148	26.6163	UP	UP	FALSE	UP	ERF6; ethylene responsive element binding factor 6; K09286 EREBP-like factor	sp|Q8VZ91|EF103_ARATH Ethylene-responsive transcription factor 6 OS=Arabidopsis thaliana GN=ERF6 PE=2 SV=2//1.02153e-111
	BnaA08g13860D	0.843318	0.446575	2.0683	4.33443	UP	UP	FALSE	UP	ethylene-responsive transcription factor ERF054; K09286 EREBP-like factor	sp|Q9M0J3|ERF54_ARATH Ethylene-responsive transcription factor ERF054 OS=Arabidopsis thaliana GN=ERF054 PE=2 SV=1//4.77766e-132
	BnaA08g18380D	2.13342	1.37748	130.165	195.838	UP	FALSE	FALSE	UP	ERF11; ethylene-responsive transcription factor 11	sp|Q9C5I3|ERF76_ARATH Ethylene-responsive transcription factor 11 OS=Arabidopsis thaliana GN=ERF11 PE=2 SV=1//5.90864e-50
	BnaA08g18390D	0.48154	0.390708	4.83776	8.08322	UP	FALSE	FALSE	UP	ERF12; ethylene-responsive transcription factor 12	sp|Q94ID6|ERF81_ARATH Ethylene-responsive transcription factor 12 OS=Arabidopsis thaliana GN=ERF12 PE=2 SV=1//2.30507e-88
	BnaA08g20700D	4.11634	3.65073	23.6039	29.368	UP	FALSE	FALSE	UP	ethylene-responsive transcription factor ERF069	sp|Q8W4I5|ERF69_ARATH Ethylene-responsive transcription factor ERF069 OS=Arabidopsis thaliana GN=ERF069 PE=1 SV=1//3.91837e-33
	BnaA09g04650D	7.7261	7.75873	0.163728	0.360029	DOWN	FALSE	FALSE	DOWN	ethylene-responsive transcription factor ERF003	sp|Q94AW5|ERF03_ARATH Ethylene-responsive transcription factor ERF003 OS=Arabidopsis thaliana GN=ERF003 PE=2 SV=1//1.00571e-70
	BnaA09g07540D	14.64	9.06206	8.56704	14.0099	UP	FALSE	DOWN	FALSE	DEAR2; ethylene-responsive transcription factor ERF010	sp|Q9FH94|ERF10_ARATH Ethylene-responsive transcription factor ERF010 OS=Arabidopsis thaliana GN=ERF010 PE=2 SV=1//3.92277e-70
	BnaA09g27300D	0.142251	0.237649	2.37464	3.01837	UP	FALSE	FALSE	UP	ERF11; ethylene-responsive transcription factor 11	sp|Q9C5I3|ERF76_ARATH Ethylene-responsive transcription factor 11 OS=Arabidopsis thaliana GN=ERF11 PE=2 SV=1//1.67239e-43
	BnaA09g28670D	4.20423	3.77214	20.9976	21.7274	UP	FALSE	FALSE	UP	TEM1; AP2/ERF and B3 domain-containing transcription repressor TEM1; K09287 RAV-like factor	sp|Q9C6M5|RAVL1_ARATH AP2/ERF and B3 domain-containing transcription repressor TEM1 OS=Arabidopsis thaliana GN=TEM1 PE=1 SV=1//0
	BnaA09g30360D	0.205545	0.119624	11.5344	51.2805	UP	UP	FALSE	UP	ethylene-responsive transcription factor ERF019	sp|O80542|ERF19_ARATH Ethylene-responsive transcription factor ERF019 OS=Arabidopsis thaliana GN=ERF019 PE=2 SV=1//4.37823e-70
	BnaA09g39350D	0.742036	0.647533	11.1302	10.5955	UP	FALSE	FALSE	UP	CRF6; ethylene-responsive transcription factor CRF6	sp|Q9M374|CRF6_ARATH Ethylene-responsive transcription factor CRF6 OS=Arabidopsis thaliana GN=CRF6 PE=1 SV=1//6.94106e-92
	BnaA10g02160D	0.68218	0.750352	13.4713	23.7871	UP	UP	FALSE	UP	ERF9; ethylene-responsive transcription factor 9; K09286 EREBP-like factor	sp|Q9FE67|ERF80_ARATH Ethylene-responsive transcription factor 9 OS=Arabidopsis thaliana GN=ERF9 PE=2 SV=1//1.2846e-41
	BnaA10g12950D	22.7498	6.07971	62.7084	31.1838	UP	DOWN	DOWN	UP	TOE2; AP2-like ethylene-responsive transcription factor TOE2; K09284 AP2-like factor, euAP2 lineage	sp|Q9LVG2|TOE2_ARATH AP2-like ethylene-responsive transcription factor TOE2 OS=Arabidopsis thaliana GN=TOE2 PE=1 SV=1//0
	BnaA10g19960D	0.642631	0.936096	0.74922	1.61873	UP	FALSE	FALSE	FALSE	Rap2.6L; ethylene-responsive transcription factor ERF113	sp|Q9LYU3|EF113_ARATH Ethylene-responsive transcription factor ERF113 OS=Arabidopsis thaliana GN=ERF113 PE=2 SV=1//6.30688e-48
	BnaA10g20950D	1.06442	1.41959	0.0475889	0.181397	DOWN	FALSE	FALSE	DOWN	TINY2; dehydration-responsive element-binding protein 3; K09286 EREBP-like factor	sp|Q9LYD3|DREB3_ARATH Dehydration-responsive element-binding protein 3 OS=Arabidopsis thaliana GN=DREB3 PE=2 SV=1//5.19791e-110
	BnaA10g25000D	3.25963	2.86541	22.3293	38.2954	UP	UP	FALSE	UP	DREB2A; dehydration-responsive element-binding protein 2A; K09286 EREBP-like factor	sp|O82132|DRE2A_ARATH Dehydration-responsive element-binding protein 2A OS=Arabidopsis thaliana GN=DREB2A PE=1 SV=1//7.72412e-86
	BnaAnng01320D	0.247636	0.103721	3.90546	8.52765	UP	UP	FALSE	UP	DREB2A; dehydration-responsive element-binding protein 2A; K09286 EREBP-like factor	sp|O82132|DRE2A_ARATH Dehydration-responsive element-binding protein 2A OS=Arabidopsis thaliana GN=DREB2A PE=1 SV=1//7.74322e-108
	BnaAnng03730D	17.5245	13.7121	558.597	565.568	UP	FALSE	FALSE	UP	CEJ1; ethylene-responsive transcription factor ERF011	sp|Q9SNE1|ERF11_ARATH Ethylene-responsive transcription factor ERF011 OS=Arabidopsis thaliana GN=ERF011 PE=2 SV=1//7.61045e-77
	BnaAnng13220D	0.116472	0.908025	5.35551	6.45564	UP	FALSE	FALSE	UP	dehydration-responsive element-binding protein 2E	sp|O80917|DRE2E_ARATH Dehydration-responsive element-binding protein 2E OS=Arabidopsis thaliana GN=DREB2E PE=2 SV=1//1.68047e-77
	BnaAnng21280D	1.18178	1.20892	332.795	504.047	UP	FALSE	FALSE	UP	ERF-1; ethylene-responsive transcription factor 1A; K09286 EREBP-like factor	sp|O80337|EF100_ARATH Ethylene-responsive transcription factor 1A OS=Arabidopsis thaliana GN=ERF1A PE=1 SV=2//2.99065e-92
	BnaAnng35170D	3.46264	3.41778	68.0834	64.8627	UP	FALSE	FALSE	UP	ethylene-responsive transcription factor ERF070	sp|Q9C995|ERF70_ARATH Ethylene-responsive transcription factor ERF070 OS=Arabidopsis thaliana GN=ERF070 PE=1 SV=1//7.60868e-47
	BnaAnng40580D	8.9285	10.0475	7.08691	12.8849	UP	FALSE	FALSE	FALSE	RAV1; AP2/ERF and B3 domain-containing transcription factor RAV1; K09287 RAV-like factor	sp|Q9ZWM9|RAV1_ARATH AP2/ERF and B3 domain-containing transcription factor RAV1 OS=Arabidopsis thaliana GN=RAV1 PE=1 SV=1//0
	BnaC01g01700D	3.99725	2.93478	35.5975	29.3681	UP	FALSE	FALSE	UP	RAP2.10; ethylene-responsive transcription factor RAP2-10; K09286 EREBP-like factor	sp|Q9SW63|RA210_ARATH Ethylene-responsive transcription factor RAP2-10 OS=Arabidopsis thaliana GN=RAP2-10 PE=2 SV=1//8.01862e-80
	BnaC01g03990D	0.198793	0.0211821	0.390433	1.08369	UP	FALSE	FALSE	FALSE	RRTF1; ethylene-responsive transcription factor ERF109	sp|Q9SZ06|EF109_ARATH Ethylene-responsive transcription factor ERF109 OS=Arabidopsis thaliana GN=ERF109 PE=1 SV=1//3.10184e-94
	BnaC01g05620D	0.902299	0.759936	12.6876	5.20567	UP	DOWN	FALSE	UP	ethylene-responsive transcription factor ERF043	sp|Q9M080|ERF43_ARATH Ethylene-responsive transcription factor ERF043 OS=Arabidopsis thaliana GN=ERF043 PE=2 SV=1//3.26242e-84
	BnaC01g10080D	1.95248	1.36625	27.3516	74.0913	UP	UP	FALSE	UP	ERF6; ethylene responsive element binding factor 6; K09286 EREBP-like factor	sp|Q8VZ91|EF103_ARATH Ethylene-responsive transcription factor 6 OS=Arabidopsis thaliana GN=ERF6 PE=2 SV=2//3.57359e-99
	BnaC01g10100D	0.913456	1.27145	306.676	489.346	UP	FALSE	FALSE	UP	ERF-1; ethylene-responsive transcription factor 1A; K09286 EREBP-like factor	sp|O80337|EF100_ARATH Ethylene-responsive transcription factor 1A OS=Arabidopsis thaliana GN=ERF1A PE=1 SV=2//6.9352e-101
	BnaC01g36330D	5.40577	4.74209	96.8436	77.187	UP	DOWN	FALSE	UP	ERF4; ethylene-responsive transcription factor 4; K09286 EREBP-like factor	sp|O80340|ERF78_ARATH Ethylene-responsive transcription factor 4 OS=Arabidopsis thaliana GN=ERF4 PE=1 SV=1//4.71534e-67
	BnaC02g04660D	0.219248	0.302698	0.977228	1.08962	UP	FALSE	FALSE	UP	Rap2.6L; ethylene-responsive transcription factor ERF113	sp|Q9LYU3|EF113_ARATH Ethylene-responsive transcription factor ERF113 OS=Arabidopsis thaliana GN=ERF113 PE=2 SV=1//1.43848e-51
	BnaC02g11520D	12.2435	12.0369	15.4487	18.8747	UP	FALSE	FALSE	UP	AIL5; AP2-like ethylene-responsive transcription factor AIL5; K09285 AP2-like factor, ANT lineage	sp|Q6PQQ3|AIL5_ARATH AP2-like ethylene-responsive transcription factor AIL5 OS=Arabidopsis thaliana GN=AIL5 PE=2 SV=2//0
	BnaC02g21480D	0.845561	1.31462	2.5115	4.14105	UP	FALSE	FALSE	UP	AP2-like ethylene-responsive transcription factor AIL1; K09285 AP2-like factor, ANT lineage	sp|Q1PFE1|AIL1_ARATH AP2-like ethylene-responsive transcription factor AIL1 OS=Arabidopsis thaliana GN=AIL1 PE=2 SV=1//0
	BnaC02g40810D	5.8826	8.97481	0.0301653	0.0647685	DOWN	FALSE	FALSE	DOWN	ethylene-responsive transcription factor ERF003	sp|Q94AW5|ERF03_ARATH Ethylene-responsive transcription factor ERF003 OS=Arabidopsis thaliana GN=ERF003 PE=2 SV=1//8.19027e-81
	BnaC02g43290D	0.568621	1.1923	176.282	214.454	UP	FALSE	FALSE	UP	ABR1; ethylene-responsive transcription factor ABR1	sp|Q9FGF8|ABR1_ARATH Ethylene-responsive transcription factor ABR1 OS=Arabidopsis thaliana GN=ABR1 PE=2 SV=1//1.52942e-114
	BnaC03g05820D	3.6388	0.42922	179.34	5.54887	UP	DOWN	DOWN	UP	Rap2.6L; ethylene-responsive transcription factor ERF113	sp|Q9LYU3|EF113_ARATH Ethylene-responsive transcription factor ERF113 OS=Arabidopsis thaliana GN=ERF113 PE=2 SV=1//1.89843e-62
	BnaC03g19550D	0.793299	0.822308	4.08724	3.08296	UP	FALSE	FALSE	UP	ERF38; ethylene-responsive transcription factor ERF038	sp|Q9ZQP3|ERF38_ARATH Ethylene-responsive transcription factor ERF038 OS=Arabidopsis thaliana GN=ERF038 PE=2 SV=1//1.18084e-79
	BnaC03g25050D	1.6124	1.28667	2.65427	1.63039	UP	FALSE	FALSE	UP	ethylene-responsive transcription factor ERF034	sp|Q8LBQ7|ERF34_ARATH Ethylene-responsive transcription factor ERF034 OS=Arabidopsis thaliana GN=ERF034 PE=2 SV=2//2.26262e-103
	BnaC03g26480D	9.82669	10.3201	13.7382	16.2063	UP	FALSE	FALSE	UP	RAP2.7; TARGET OF EARLY ACTIVATION TAGGED 1; K09284 AP2-like factor, euAP2 lineage	sp|Q9SK03|RAP27_ARATH Ethylene-responsive transcription factor RAP2-7 OS=Arabidopsis thaliana GN=RAP2-7 PE=2 SV=2//0
	BnaC03g39000D	5.02644	3.99681	13.3601	23.1775	UP	UP	FALSE	UP	ERF4; ethylene-responsive transcription factor 4; K09286 EREBP-like factor	sp|O80340|ERF78_ARATH Ethylene-responsive transcription factor 4 OS=Arabidopsis thaliana GN=ERF4 PE=1 SV=1//3.92101e-72
	BnaC03g41530D	7.33671	7.45963	14.13	12.1367	UP	FALSE	FALSE	UP	ERF7; ethylene-responsive transcription factor 7; K09286 EREBP-like factor	sp|Q9LDE4|ERF83_ARATH Ethylene-responsive transcription factor 7 OS=Arabidopsis thaliana GN=ERF7 PE=1 SV=1//3.93923e-77
	BnaC03g49530D	0.0746058	0.0868447	12.0397	20.1971	UP	FALSE	FALSE	UP	ABR1; ethylene-responsive transcription factor ABR1	sp|Q9FGF8|ABR1_ARATH Ethylene-responsive transcription factor ABR1 OS=Arabidopsis thaliana GN=ABR1 PE=2 SV=1//3.50311e-122
	BnaC03g60650D	0.888124	0.860261	1.86928	1.30359	UP	FALSE	FALSE	UP	ethylene-responsive transcription factor ERF060	sp|O65665|ERF60_ARATH Ethylene-responsive transcription factor ERF060 OS=Arabidopsis thaliana GN=ERF060 PE=2 SV=1//1.98737e-118
	BnaC03g61270D	1.60572	1.70963	0.0217586	0.110754	DOWN	FALSE	FALSE	DOWN	ANT; AP2-like ethylene-responsive transcription factor ANT; K09285 AP2-like factor, ANT lineage	sp|Q38914|ANT_ARATH AP2-like ethylene-responsive transcription factor ANT OS=Arabidopsis thaliana GN=ANT PE=1 SV=2//0
	BnaC03g69420D	7.79206	6.46984	26.7486	39.0774	UP	FALSE	FALSE	UP	ERF4; ethylene-responsive transcription factor 4; K09286 EREBP-like factor	sp|O80340|ERF78_ARATH Ethylene-responsive transcription factor 4 OS=Arabidopsis thaliana GN=ERF4 PE=1 SV=1//2.69132e-39
	BnaC04g44080D	0.0265101	0.0284937	7.89737	22.8964	UP	UP	FALSE	UP	ethylene-responsive transcription factor ERF112	sp|P93007|EF112_ARATH Ethylene-responsive transcription factor ERF112 OS=Arabidopsis thaliana GN=ERF112 PE=2 SV=1//9.09694e-50
	BnaC04g47060D	0.27421	0.209279	2.09866	3.58099	UP	FALSE	FALSE	UP	DREB2C; dehydration-responsive element-binding protein 2C	sp|Q8LFR2|DRE2C_ARATH Dehydration-responsive element-binding protein 2C OS=Arabidopsis thaliana GN=DREB2C PE=2 SV=2//2.55761e-66
	BnaC04g51210D	2.67076	3.54031	933.223	966.446	UP	FALSE	FALSE	UP	HRE2; ethylene-responsive transcription factor ERF071	sp|O22259|ERF71_ARATH Ethylene-responsive transcription factor ERF071 OS=Arabidopsis thaliana GN=ERF071 PE=2 SV=1//6.32605e-45
	BnaC05g18050D	0.59616	0.418241	30.7899	80.8479	UP	UP	FALSE	UP	ethylene-responsive transcription factor ERF019	sp|O80542|ERF19_ARATH Ethylene-responsive transcription factor ERF019 OS=Arabidopsis thaliana GN=ERF019 PE=2 SV=1//4.50456e-73
	BnaC05g20560D	3.52381	3.54116	73.707	68.0105	UP	FALSE	FALSE	UP	TEM1; AP2/ERF and B3 domain-containing transcription repressor TEM1; K09287 RAV-like factor	sp|Q9C6M5|RAVL1_ARATH AP2/ERF and B3 domain-containing transcription repressor TEM1 OS=Arabidopsis thaliana GN=TEM1 PE=1 SV=1//0
	BnaC05g36570D	7.31824	8.93786	1.61482	3.80001	FALSE	UP	FALSE	DOWN	EBP; ethylene-responsive transcription factor RAP2-3; K09286 EREBP-like factor	sp|P42736|RAP23_ARATH Ethylene-responsive transcription factor RAP2-3 OS=Arabidopsis thaliana GN=RAP2-3 PE=1 SV=2//1.11356e-111
	BnaC05g37110D	2.24708	3.23026	16.486	15.2221	UP	FALSE	FALSE	UP	ethylene-responsive transcription factor ERF036	sp|Q9LU18|ERF36_ARATH Ethylene-responsive transcription factor ERF036 OS=Arabidopsis thaliana GN=ERF036 PE=2 SV=2//6.3444e-67
	BnaC05g38410D	11.7688	9.54419	268.585	265.55	UP	FALSE	FALSE	UP	ERF4; ethylene-responsive transcription factor 4; K09286 EREBP-like factor	sp|O80340|ERF78_ARATH Ethylene-responsive transcription factor 4 OS=Arabidopsis thaliana GN=ERF4 PE=1 SV=1//1.89905e-70
	BnaC05g39400D	10.3955	10.5747	13.3565	14.4328	UP	FALSE	FALSE	UP	RAP2.2; ethylene-responsive transcription factor RAP2-2; K09286 EREBP-like factor	sp|Q9LUM4|RAP22_ARATH Ethylene-responsive transcription factor RAP2-2 OS=Arabidopsis thaliana GN=RAP2-2 PE=1 SV=2//5.08121e-132
	BnaC05g42130D	0.204819	0.592023	14.1225	18.4027	UP	FALSE	FALSE	UP	DREB2B; dehydration-responsive element-binding protein 2B; K09286 EREBP-like factor	sp|O82133|DRE2B_ARATH Dehydration-responsive element-binding protein 2B OS=Arabidopsis thaliana GN=DREB2B PE=2 SV=1//2.92427e-93
	BnaC06g03860D	20.5348	20.5119	203.229	184.471	UP	FALSE	FALSE	UP	ERF3; ethylene-responsive transcription factor 3; K09286 EREBP-like factor	sp|O80339|ERF82_ARATH Ethylene-responsive transcription factor 3 OS=Arabidopsis thaliana GN=ERF3 PE=1 SV=1//1.15346e-56
	BnaC06g24360D	0.628603	0.582432	1.53508	2.26507	UP	FALSE	FALSE	UP	HRE1; ethylene-responsive transcription factor ERF073	sp|Q8H0T5|ERF73_ARATH Ethylene-responsive transcription factor ERF073 OS=Arabidopsis thaliana GN=ERF073 PE=2 SV=1//9.23976e-53
	BnaC06g32600D	0.0375719	0.0414634	40.6502	60.8846	UP	FALSE	FALSE	UP	ERF/AP2 transcription factor family protein DREB A-5	sp|Q9C9I8|ERF20_ARATH Ethylene-responsive transcription factor ERF020 OS=Arabidopsis thaliana GN=ERF020 PE=2 SV=1//3.01347e-72
	BnaC06g40040D	3.33575	2.10607	14.3593	7.82111	UP	DOWN	FALSE	UP	AP2-like ethylene-responsive transcription factor WRI4; K09285 AP2-like factor, ANT lineage	sp|A0JPZ8|AP2L3_ARATH AP2-like ethylene-responsive transcription factor At1g79700 OS=Arabidopsis thaliana GN=At1g79700 PE=2 SV=1//2.1646e-121
	BnaC06g41440D	1.10238	1.26608	106.007	115.249	UP	FALSE	FALSE	UP	ERF8; ethylene-responsive transcription factor 8	sp|Q9MAI5|ERF79_ARATH Ethylene-responsive transcription factor 8 OS=Arabidopsis thaliana GN=ERF8 PE=2 SV=1//5.95647e-30
	BnaC06g42850D	2.33329	1.89811	126.847	117.287	UP	FALSE	FALSE	UP	CRF6; ethylene-responsive transcription factor CRF6	sp|Q9M374|CRF6_ARATH Ethylene-responsive transcription factor CRF6 OS=Arabidopsis thaliana GN=CRF6 PE=1 SV=1//2.87925e-82
	BnaC07g10480D	0.170116	0.305297	1.79338	2.06785	UP	FALSE	FALSE	UP	ERF12; ethylene-responsive transcription factor 12	sp|Q94ID6|ERF81_ARATH Ethylene-responsive transcription factor 12 OS=Arabidopsis thaliana GN=ERF12 PE=2 SV=1//2.33745e-75
	BnaC07g13400D	1.86762	1.66324	35.6435	22.3747	UP	DOWN	FALSE	UP	ethylene-responsive transcription factor ERF070	sp|Q9C995|ERF70_ARATH Ethylene-responsive transcription factor ERF070 OS=Arabidopsis thaliana GN=ERF070 PE=1 SV=1//4.61834e-48
	BnaC07g16160D	11.6625	8.83364	47.9455	40.3477	UP	FALSE	FALSE	UP	DEAR2; ethylene-responsive transcription factor ERF010	sp|Q9FH94|ERF10_ARATH Ethylene-responsive transcription factor ERF010 OS=Arabidopsis thaliana GN=ERF010 PE=2 SV=1//5.02154e-82
	BnaC07g20040D	1.04831	0.223444	2.26794	7.81964	UP	UP	DOWN	UP	ERF2; ethylene-responsive transcription factor 2; K14517 ethylene-responsive transcription factor 2	sp|O80338|EF101_ARATH Ethylene-responsive transcription factor 2 OS=Arabidopsis thaliana GN=ERF2 PE=2 SV=1//1.33836e-76
	BnaC07g20090D	0.77329	0.448325	2.373	2.56468	UP	FALSE	FALSE	UP	ERF5; ethylene-responsive transcription factor 5; K09286 EREBP-like factor	sp|O80341|EF102_ARATH Ethylene-responsive transcription factor 5 OS=Arabidopsis thaliana GN=ERF5 PE=2 SV=1//1.4321e-102
	BnaC07g29050D	2.86815	2.75765	0.128501	0.37029	DOWN	FALSE	FALSE	DOWN	tny; ethylene-responsive transcription factor TINY; K09286 EREBP-like factor	sp|Q39127|TINY_ARATH Ethylene-responsive transcription factor TINY OS=Arabidopsis thaliana GN=TINY PE=2 SV=1//1.30073e-93
	BnaC07g31340D	4.49958	3.10644	52.6907	59.8833	UP	FALSE	FALSE	UP	ethylene-responsive transcription factor ERF107	sp|Q9FKG2|EF107_ARATH Ethylene-responsive transcription factor ERF107 OS=Arabidopsis thaliana GN=ERF107 PE=2 SV=1//7.05959e-93
	BnaC07g31350D	0.704056	0.323295	16.9523	11.8838	UP	FALSE	FALSE	UP	ERF104; ethylene-responsive transcription factor ERF104; K09286 EREBP-like factor	sp|Q9FKG1|EF104_ARATH Ethylene-responsive transcription factor ERF104 OS=Arabidopsis thaliana GN=ERF104 PE=1 SV=1//1.87949e-95
	BnaC07g45030D	0.10082	0.0222525	0.837363	1.66833	UP	FALSE	FALSE	UP	RRTF1; ethylene-responsive transcription factor ERF109	sp|Q9SZ06|EF109_ARATH Ethylene-responsive transcription factor ERF109 OS=Arabidopsis thaliana GN=ERF109 PE=1 SV=1//8.11366e-92
	BnaC08g04820D	0.970697	1.1928	1.31731	2.50107	UP	FALSE	FALSE	FALSE	RAP2.1; ethylene-responsive transcription factor RAP2-1; K09286 EREBP-like factor	sp|Q8LC30|RAP21_ARATH Ethylene-responsive transcription factor RAP2-1 OS=Arabidopsis thaliana GN=RAP2-1 PE=2 SV=1//4.13696e-61
	BnaC08g06130D	6.63104	5.63384	54.9787	61.9205	UP	FALSE	FALSE	UP	ethylene-responsive transcription factor ERF069	sp|Q8W4I5|ERF69_ARATH Ethylene-responsive transcription factor ERF069 OS=Arabidopsis thaliana GN=ERF069 PE=1 SV=1//5.37687e-34
	BnaC08g20020D	1.80928	0.77106	0.0289256	0.190393	FALSE	FALSE	FALSE	DOWN	ethylene-responsive transcription factor ERF012	sp|Q9SFE4|ERF12_ARATH Ethylene-responsive transcription factor ERF012 OS=Arabidopsis thaliana GN=ERF012 PE=2 SV=1//2.20624e-82
	BnaC08g21640D	10.9821	8.98142	132.269	127.968	UP	FALSE	FALSE	UP	CEJ1; ethylene-responsive transcription factor ERF011	sp|Q9SNE1|ERF11_ARATH Ethylene-responsive transcription factor ERF011 OS=Arabidopsis thaliana GN=ERF011 PE=2 SV=1//5.58282e-76
	BnaC08g31500D	1.09999	1.00318	269.513	216.763	UP	DOWN	FALSE	UP	CRF6; ethylene-responsive transcription factor CRF6	sp|Q9M374|CRF6_ARATH Ethylene-responsive transcription factor CRF6 OS=Arabidopsis thaliana GN=CRF6 PE=1 SV=1//6.39093e-92
	BnaC08g36830D	0.9168	0.231067	0.314521	1.77311	UP	UP	FALSE	FALSE	ethylene-responsive transcription factor ERF017	sp|Q84QC2|ERF17_ARATH Ethylene-responsive transcription factor ERF017 OS=Arabidopsis thaliana GN=ERF017 PE=2 SV=1//6.66935e-78
	BnaC09g04110D	7.34907	10.3067	0.0641971	0.363413	DOWN	FALSE	FALSE	DOWN	ethylene-responsive transcription factor ERF003	sp|Q94AW5|ERF03_ARATH Ethylene-responsive transcription factor ERF003 OS=Arabidopsis thaliana GN=ERF003 PE=2 SV=1//8.25864e-71
	BnaC09g07480D	11.8064	6.82086	7.84763	14.2365	UP	UP	DOWN	FALSE	DEAR2; ethylene-responsive transcription factor ERF010	sp|Q9FH94|ERF10_ARATH Ethylene-responsive transcription factor ERF010 OS=Arabidopsis thaliana GN=ERF010 PE=2 SV=1//7.81451e-84
	BnaC09g20090D	0.0904589	0.0232915	0.746801	2.54618	UP	UP	FALSE	UP	ERF2; ethylene-responsive transcription factor 2; K14517 ethylene-responsive transcription factor 2	sp|O80338|EF101_ARATH Ethylene-responsive transcription factor 2 OS=Arabidopsis thaliana GN=ERF2 PE=2 SV=1//4.46701e-81
	BnaC09g20100D	0.276164	0.18571	1.22099	1.51087	UP	FALSE	FALSE	UP	ERF5; ethylene-responsive transcription factor 5; K09286 EREBP-like factor	sp|O80341|EF102_ARATH Ethylene-responsive transcription factor 5 OS=Arabidopsis thaliana GN=ERF5 PE=2 SV=1//1.25798e-124
	BnaC09g27360D	0.610968	0.608562	1.26371	3.84847	UP	FALSE	FALSE	UP	ethylene-responsive transcription factor ERF105	sp|Q8VY90|EF105_ARATH Ethylene-responsive transcription factor ERF105 OS=Arabidopsis thaliana GN=ERF105 PE=2 SV=1//2.84327e-121
	BnaC09g46030D	0.538261	0.663082	1.24029	1.39772	UP	FALSE	FALSE	UP	AIL6; AP2-like ethylene-responsive transcription factor AIL6; K09285 AP2-like factor, ANT lineage	sp|Q52QU2|AIL6_ARATH AP2-like ethylene-responsive transcription factor AIL6 OS=Arabidopsis thaliana GN=AIL6 PE=2 SV=1//0
	BnaC09g49920D	6.56504	3.97354	47.0553	111.16	UP	UP	DOWN	UP	DREB2A; dehydration-responsive element-binding protein 2A; K09286 EREBP-like factor	sp|O82132|DRE2A_ARATH Dehydration-responsive element-binding protein 2A OS=Arabidopsis thaliana GN=DREB2A PE=1 SV=1//3.47319e-98
	BnaCnng04580D	8.58504	7.29745	9.30638	15.0648	UP	UP	FALSE	UP	TEM1; AP2/ERF and B3 domain-containing transcription repressor TEM1; K09287 RAV-like factor	sp|Q9C6M5|RAVL1_ARATH AP2/ERF and B3 domain-containing transcription repressor TEM1 OS=Arabidopsis thaliana GN=TEM1 PE=1 SV=1//0
	BnaCnng05370D	0.102656	0.103539	5.9038	11.3377	UP	UP	FALSE	UP	ethylene-responsive transcription factor ERF112	sp|P93007|EF112_ARATH Ethylene-responsive transcription factor ERF112 OS=Arabidopsis thaliana GN=ERF112 PE=2 SV=1//3.29413e-82
	BnaCnng39660D	3.38217	4.24492	7.70674	8.39981	UP	FALSE	FALSE	UP	RAP2.10; ethylene-responsive transcription factor RAP2-10; K09286 EREBP-like factor	sp|Q9SW63|RA210_ARATH Ethylene-responsive transcription factor RAP2-10 OS=Arabidopsis thaliana GN=RAP2-10 PE=2 SV=1//1.24561e-78
	BnaCnng60520D	7.83823	2.19018	75.1727	132.637	UP	UP	DOWN	UP	ERF2; ethylene-responsive transcription factor 2; K14517 ethylene-responsive transcription factor 2	sp|O80338|EF101_ARATH Ethylene-responsive transcription factor 2 OS=Arabidopsis thaliana GN=ERF2 PE=2 SV=1//3.16803e-77
	BnaCnng63180D	1.74701	1.15869	97.5838	109.639	UP	FALSE	FALSE	UP	ERF11; ethylene-responsive transcription factor 11	sp|Q9C5I3|ERF76_ARATH Ethylene-responsive transcription factor 11 OS=Arabidopsis thaliana GN=ERF11 PE=2 SV=1//2.53803e-49
	BnaCnng67070D	3.07389	1.97322	35.4016	46.8482	UP	FALSE	FALSE	UP	ERF11; ethylene-responsive transcription factor 11	sp|Q9C5I3|ERF76_ARATH Ethylene-responsive transcription factor 11 OS=Arabidopsis thaliana GN=ERF11 PE=2 SV=1//7.29812e-37
	BnaCnng69090D	0.0577138	0.0273817	7.84354	10.9731	UP	FALSE	FALSE	UP	dehydration-responsive element-binding protein 2D	sp|Q9LQZ2|DRE2D_ARATH Dehydration-responsive element-binding protein 2D OS=Arabidopsis thaliana GN=DREB2D PE=2 SV=1//7.01115e-113
	BnaCnng75020D	0.164165	0.384952	15.3286	15.1147	UP	FALSE	FALSE	UP	dehydration-responsive element-binding protein 2E	sp|O80917|DRE2E_ARATH Dehydration-responsive element-binding protein 2E OS=Arabidopsis thaliana GN=DREB2E PE=2 SV=1//4.59247e-85
ARF(10)	BnaA04g07950D	2.27966	2.87102	0.0434965	0.139924	DOWN	FALSE	FALSE	DOWN	ARF8; auxin response factor 8	sp|Q9FGV1|ARFH_ARATH Auxin response factor 8 OS=Arabidopsis thaliana GN=ARF8 PE=2 SV=2//0
	BnaA05g01310D	1.07363	1.35529	0.506596	1.45605	UP	UP	FALSE	FALSE	ARF11; auxin response factor 11	sp|Q9ZPY6|ARFK_ARATH Auxin response factor 11 OS=Arabidopsis thaliana GN=ARF11 PE=2 SV=3//0
	BnaA05g09790D	7.02401	7.82986	0.211	0.611323	DOWN	FALSE	FALSE	DOWN	ETT; auxin response transcription factor 3; K14486 auxin response factor	sp|O23661|ARFC_ARATH Auxin response factor 3 OS=Arabidopsis thaliana GN=ARF3 PE=1 SV=2//0
	BnaA06g14040D	1.52927	1.58565	5.66436	5.15473	UP	FALSE	FALSE	UP	MP; auxin response factor 5; K14486 auxin response factor	sp|P93024|ARFE_ARATH Auxin response factor 5 OS=Arabidopsis thaliana GN=ARF5 PE=1 SV=3//0
	BnaA07g11660D	1.40417	1.24949	0.0934496	0.220657	DOWN	FALSE	FALSE	DOWN	MP; auxin response factor 5; K14486 auxin response factor	sp|P93024|ARFE_ARATH Auxin response factor 5 OS=Arabidopsis thaliana GN=ARF5 PE=1 SV=3//0
	BnaC05g14880D	1.79701	1.98891	4.13505	3.3519	UP	FALSE	FALSE	UP	ARF19; auxin response factor 19	sp|Q8RYC8|ARFS_ARATH Auxin response factor 19 OS=Arabidopsis thaliana GN=ARF19 PE=1 SV=2//1.11143e-07
	BnaC05g15390D	1.34204	1.44376	18.7301	14.5992	UP	FALSE	FALSE	UP	MP; auxin response factor 5; K14486 auxin response factor	sp|P93024|ARFE_ARATH Auxin response factor 5 OS=Arabidopsis thaliana GN=ARF5 PE=1 SV=3//0
	BnaC08g19040D	1.37995	1.40986	1.69551	2.01563	UP	FALSE	FALSE	UP	MP; auxin response factor 5; K14486 auxin response factor	sp|P93024|ARFE_ARATH Auxin response factor 5 OS=Arabidopsis thaliana GN=ARF5 PE=1 SV=3//0
	BnaC09g05450D	13.1724	12.9622	23.7151	18.1663	UP	DOWN	FALSE	UP	ARF2; auxin response factor 2	sp|Q94JM3|ARFB_ARATH Auxin response factor 2 OS=Arabidopsis thaliana GN=ARF2 PE=1 SV=2//0
	BnaCnng05140D	4.27689	5.12434	0.146694	0.458441	DOWN	FALSE	FALSE	DOWN	ETT; auxin response transcription factor 3; K14486 auxin response factor	sp|O23661|ARFC_ARATH Auxin response factor 3 OS=Arabidopsis thaliana GN=ARF3 PE=1 SV=2//0
ARID(1)	BnaC06g36780D	4.44733	4.4256	0.275461	0.652673	DOWN	FALSE	FALSE	DOWN	high mobility group B protein 9	sp|Q9SGS2|HMGB9_ARATH High mobility group B protein 9 OS=Arabidopsis thaliana GN=HMGB9 PE=2 SV=1//0
ARR-B(2)	BnaC03g39750D	5.85266	5.06629	6.74258	6.45823	UP	FALSE	FALSE	UP	RR1; response regulator 1; K14491 two-component response regulator ARR-B family	sp|Q940D0|ARR1_ARATH Two-component response regulator ARR1 OS=Arabidopsis thaliana GN=ARR1 PE=1 SV=2//1.43897e-06
	BnaC06g26570D	0.858165	0.806851	2.32441	2.11366	UP	FALSE	FALSE	UP	ARR11; two-component response regulator ARR11; K14491 two-component response regulator ARR-B family	sp|Q9FXD6|ARR11_ARATH Two-component response regulator ARR11 OS=Arabidopsis thaliana GN=ARR11 PE=1 SV=1//0
AUX/IAA(27)	BnaA01g07810D	3.07641	3.56249	0.0693556	0.199208	DOWN	FALSE	FALSE	DOWN	PAP2; phytochrome-associated protein 2; K14484 auxin-responsive protein IAA	sp|Q9ZSY8|IAA27_ARATH Auxin-responsive protein IAA27 OS=Arabidopsis thaliana GN=IAA27 PE=1 SV=1//2.08996e-59
	BnaA01g08280D	1.88191	2.31869	21.3748	22.3934	UP	FALSE	FALSE	UP	IAA11; auxin-responsive protein IAA11; K14484 auxin-responsive protein IAA	sp|Q38829|IAA11_ARATH Auxin-responsive protein IAA11 OS=Arabidopsis thaliana GN=IAA11 PE=1 SV=1//1.14971e-117
	BnaA01g24190D	10.7621	9.46879	2.85346	6.54423	FALSE	FALSE	FALSE	DOWN	IAA2; auxin-responsive protein IAA2; K14484 auxin-responsive protein IAA	sp|P49678|IAA2_ARATH Auxin-responsive protein IAA2 OS=Arabidopsis thaliana GN=IAA2 PE=1 SV=3//2.27029e-102
	BnaA01g28670D	0.260691	0.473447	3.08541	4.61886	UP	FALSE	FALSE	UP	IAA19; auxin-responsive protein IAA19; K14484 auxin-responsive protein IAA	sp|O24409|IAA19_ARATH Auxin-responsive protein IAA19 OS=Arabidopsis thaliana GN=IAA19 PE=1 SV=2//1.05745e-124
	BnaA01g33420D	5.05483	6.20796	157.56	221.665	UP	FALSE	FALSE	UP	IAA16; auxin-responsive protein IAA16; K14484 auxin-responsive protein IAA	sp|O24407|IAA16_ARATH Auxin-responsive protein IAA16 OS=Arabidopsis thaliana GN=IAA16 PE=1 SV=1//1.63515e-129
	BnaA03g36940D	2.61901	1.79403	1.22222	3.18324	UP	UP	FALSE	FALSE	IAA2; auxin-responsive protein IAA2; K14484 auxin-responsive protein IAA	sp|P49678|IAA2_ARATH Auxin-responsive protein IAA2 OS=Arabidopsis thaliana GN=IAA2 PE=1 SV=3//1.30107e-102
	BnaA04g27430D	0.467725	0.476189	122.397	174.919	UP	FALSE	FALSE	UP	IAA30; auxin-responsive protein IAA30; K14484 auxin-responsive protein IAA	sp|Q9M1R4|IAA30_ARATH Auxin-responsive protein IAA30 OS=Arabidopsis thaliana GN=IAA30 PE=2 SV=1//5.67311e-84
	BnaA05g16700D	5.76166	6.69875	10.7063	20.3783	UP	UP	FALSE	UP	IAA2; auxin-responsive protein IAA2; K14484 auxin-responsive protein IAA	sp|P49678|IAA2_ARATH Auxin-responsive protein IAA2 OS=Arabidopsis thaliana GN=IAA2 PE=1 SV=3//3.6982e-86
	BnaA06g02010D	11.1907	11.5861	116.677	98.7037	UP	FALSE	FALSE	UP	IAA18; auxin-responsive protein IAA18; K14484 auxin-responsive protein IAA	sp|O24408|IAA18_ARATH Auxin-responsive protein IAA18 OS=Arabidopsis thaliana GN=IAA18 PE=1 SV=2//2.58883e-137
	BnaA06g09800D	6.6899	9.86091	0.108363	0.472068	DOWN	FALSE	FALSE	DOWN	IAA34; auxin-responsive protein IAA34; K14484 auxin-responsive protein IAA	sp|Q9C5X0|IAA34_ARATH Auxin-responsive protein IAA34 OS=Arabidopsis thaliana GN=IAA34 PE=2 SV=1//8.68217e-62
	BnaA07g19140D	0.264017	0.539613	4.97767	9.90679	UP	UP	FALSE	UP	IAA30; auxin-responsive protein IAA30; K14484 auxin-responsive protein IAA	sp|Q9M1R4|IAA30_ARATH Auxin-responsive protein IAA30 OS=Arabidopsis thaliana GN=IAA30 PE=2 SV=1//1.30856e-79
	BnaA08g01770D	5.91729	6.0923	15.0376	12.2714	UP	FALSE	FALSE	UP	IAA18; auxin-responsive protein IAA18; K14484 auxin-responsive protein IAA	sp|O24408|IAA18_ARATH Auxin-responsive protein IAA18 OS=Arabidopsis thaliana GN=IAA18 PE=1 SV=2//4.05216e-144
	BnaA09g39680D	0.201962	0.156916	4.21156	9.56455	UP	UP	FALSE	UP	IAA30; auxin-responsive protein IAA30; K14484 auxin-responsive protein IAA	sp|Q9M1R4|IAA30_ARATH Auxin-responsive protein IAA30 OS=Arabidopsis thaliana GN=IAA30 PE=2 SV=1//3.4763e-74
	BnaA10g02380D	0.970674	0.937587	2.32426	3.81826	UP	FALSE	FALSE	UP	IAA10; auxin-responsive protein IAA10; K14484 auxin-responsive protein IAA	sp|Q38828|IAA10_ARATH Auxin-responsive protein IAA10 OS=Arabidopsis thaliana GN=IAA10 PE=2 SV=1//1.21107e-73
	BnaAnng10570D	52.0251	51.6948	502.768	550.399	UP	FALSE	FALSE	UP	IAA16; auxin-responsive protein IAA16; K14484 auxin-responsive protein IAA	sp|O24407|IAA16_ARATH Auxin-responsive protein IAA16 OS=Arabidopsis thaliana GN=IAA16 PE=1 SV=1//1.64563e-134
	BnaAnng12210D	1.73179	3.92551	0.204445	0.837093	DOWN	FALSE	UP	DOWN	IAA12; indole-3-acetic acid inducible 12; K14484 auxin-responsive protein IAA	sp|Q38830|IAA12_ARATH Auxin-responsive protein IAA12 OS=Arabidopsis thaliana GN=IAA12 PE=1 SV=1//6.35625e-91
	BnaC01g09830D	7.48696	8.4285	32.6859	38.9586	UP	FALSE	FALSE	UP	IAA11; auxin-responsive protein IAA11; K14484 auxin-responsive protein IAA	sp|Q38829|IAA11_ARATH Auxin-responsive protein IAA11 OS=Arabidopsis thaliana GN=IAA11 PE=1 SV=1//3.56348e-119
	BnaC01g31190D	9.92377	8.09291	2.09763	5.01028	FALSE	UP	FALSE	DOWN	IAA2; auxin-responsive protein IAA2; K14484 auxin-responsive protein IAA	sp|P49678|IAA2_ARATH Auxin-responsive protein IAA2 OS=Arabidopsis thaliana GN=IAA2 PE=1 SV=3//6.26554e-102
	BnaC01g36030D	1.90585	1.48151	5.10794	8.02409	UP	FALSE	FALSE	UP	IAA19; auxin-responsive protein IAA19; K14484 auxin-responsive protein IAA	sp|O24409|IAA19_ARATH Auxin-responsive protein IAA19 OS=Arabidopsis thaliana GN=IAA19 PE=1 SV=2//3.16154e-123
	BnaC01g39910D	0.91505	0.608665	26.4631	30.4414	UP	FALSE	FALSE	UP	IAA16; auxin-responsive protein IAA16; K14484 auxin-responsive protein IAA	sp|O24407|IAA16_ARATH Auxin-responsive protein IAA16 OS=Arabidopsis thaliana GN=IAA16 PE=1 SV=1//6.24046e-125
	BnaC03g39170D	6.90592	7.41697	14.0358	10.664	UP	FALSE	FALSE	UP	IAA19; auxin-responsive protein IAA19; K14484 auxin-responsive protein IAA	sp|O24409|IAA19_ARATH Auxin-responsive protein IAA19 OS=Arabidopsis thaliana GN=IAA19 PE=1 SV=2//2.38304e-118
	BnaC05g02280D	2.36534	2.00855	3.69531	4.92164	UP	FALSE	FALSE	UP	IAA10; auxin-responsive protein IAA10; K14484 auxin-responsive protein IAA	sp|Q38828|IAA10_ARATH Auxin-responsive protein IAA10 OS=Arabidopsis thaliana GN=IAA10 PE=2 SV=1//3.02636e-77
	BnaC05g11370D	3.13797	5.00348	0.10333	0.614751	DOWN	FALSE	FALSE	DOWN	IAA34; auxin-responsive protein IAA34; K14484 auxin-responsive protein IAA	sp|Q9C5X0|IAA34_ARATH Auxin-responsive protein IAA34 OS=Arabidopsis thaliana GN=IAA34 PE=2 SV=1//1.43812e-60
	BnaC05g29330D	9.50289	11.6281	12.2233	22.614	UP	UP	FALSE	UP	IAA2; auxin-responsive protein IAA2; K14484 auxin-responsive protein IAA	sp|P49678|IAA2_ARATH Auxin-responsive protein IAA2 OS=Arabidopsis thaliana GN=IAA2 PE=1 SV=3//4.43451e-85
	BnaC06g05090D	7.16257	9.31319	169.214	165.362	UP	FALSE	FALSE	UP	IAA18; auxin-responsive protein IAA18; K14484 auxin-responsive protein IAA	sp|O24408|IAA18_ARATH Auxin-responsive protein IAA18 OS=Arabidopsis thaliana GN=IAA18 PE=1 SV=2//1.45252e-135
	BnaC06g09250D	0.295134	0.591808	12.6052	11.4008	UP	FALSE	FALSE	UP	IAA18; auxin-responsive protein IAA18; K14484 auxin-responsive protein IAA	sp|O24408|IAA18_ARATH Auxin-responsive protein IAA18 OS=Arabidopsis thaliana GN=IAA18 PE=1 SV=2//1.17865e-144
	BnaC06g18310D	1.52325	2.60528	4.19801	7.61455	UP	FALSE	FALSE	UP	IAA30; auxin-responsive protein IAA30; K14484 auxin-responsive protein IAA	sp|Q9M1R4|IAA30_ARATH Auxin-responsive protein IAA30 OS=Arabidopsis thaliana GN=IAA30 PE=2 SV=1//3.90145e-92
BBR/BPC(7)	BnaA01g05230D	2.26441	5.92111	4.61713	7.80244	UP	FALSE	UP	UP	BPC5; basic pentacysteine 5	sp|F4JUI3|BPC5_ARATH Protein BASIC PENTACYSTEINE5 OS=Arabidopsis thaliana GN=BPC5 PE=1 SV=1//3.459e-147
	BnaA03g56400D	1.4657	1.33226	0.0865703	0.277614	DOWN	FALSE	FALSE	DOWN	BPC7; basic pentacysteine 7	sp|O82286|BPC7_ARATH Protein BASIC PENTACYSTEINE7 OS=Arabidopsis thaliana GN=BPC7 PE=1 SV=1//7.03715e-109
	BnaA06g09500D	3.52317	3.14309	6.31245	6.60628	UP	FALSE	FALSE	UP	BPC2; basic pentacysteine 2	sp|Q9LDE2|BPC2_ARATH Protein BASIC PENTACYSTEINE2 OS=Arabidopsis thaliana GN=BPC2 PE=1 SV=1//1.95661e-148
	BnaA08g31470D	17.6859	17.7449	29.8064	31.3077	UP	FALSE	FALSE	UP	BPC2; basic pentacysteine 2	sp|Q9LDE2|BPC2_ARATH Protein BASIC PENTACYSTEINE2 OS=Arabidopsis thaliana GN=BPC2 PE=1 SV=1//1.13672e-164
	BnaC01g00050D	6.36962	6.36988	9.98776	9.62141	UP	FALSE	FALSE	UP	BPC5; basic pentacysteine 5	sp|F4JUI3|BPC5_ARATH Protein BASIC PENTACYSTEINE5 OS=Arabidopsis thaliana GN=BPC5 PE=1 SV=1//1.56351e-132
	BnaC05g10870D	2.95592	3.05256	5.3628	6.56214	UP	FALSE	FALSE	UP	BPC2; basic pentacysteine 2	sp|Q9LDE2|BPC2_ARATH Protein BASIC PENTACYSTEINE2 OS=Arabidopsis thaliana GN=BPC2 PE=1 SV=1//4.83962e-149
	BnaC08g16280D	11.5479	11.2849	17.0798	17.1124	UP	FALSE	FALSE	UP	BPC2; basic pentacysteine 2	sp|Q9LDE2|BPC2_ARATH Protein BASIC PENTACYSTEINE2 OS=Arabidopsis thaliana GN=BPC2 PE=1 SV=1//1.73436e-157
BES1(13)	BnaA01g01040D	2.95773	6.56057	52.401	103.99	UP	UP	UP	UP	BEH2; BES1/BZR1-like protein 2	sp|Q94A43|BEH2_ARATH BES1/BZR1 homolog protein 2 OS=Arabidopsis thaliana GN=BEH2 PE=1 SV=1//2.41033e-144
	BnaA02g17120D	4.62782	6.41882	0.702757	1.54962	DOWN	FALSE	FALSE	DOWN	BZR1; brassinazole-resistant 1 protein; K14503 brassinosteroid resistant 1/2	sp|Q8S307|BZR1_ARATH Protein BRASSINAZOLE-RESISTANT 1 OS=Arabidopsis thaliana GN=BZR1 PE=1 SV=1//2.05492e-13
	BnaA02g17130D	1.48697	2.73232	0.152783	0.414379	DOWN	FALSE	FALSE	DOWN	BZR1; brassinazole-resistant 1 protein; K14503 brassinosteroid resistant 1/2	sp|Q8S307|BZR1_ARATH Protein BRASSINAZOLE-RESISTANT 1 OS=Arabidopsis thaliana GN=BZR1 PE=1 SV=1//2.57264e-20
	BnaA02g19020D	1.59067	1.53158	1.52665	2.19971	UP	FALSE	FALSE	FALSE	BEH4; BES1/BZR1 homolog 4	sp|Q9ZV88|BEH4_ARATH BES1/BZR1 homolog protein 4 OS=Arabidopsis thaliana GN=BEH4 PE=1 SV=1//1.13885e-131
	BnaA03g43770D	2.36146	2.02636	5.66952	7.2601	UP	FALSE	FALSE	UP	BEH3; BES1/BZR1-like protein 3	sp|O49404|BEH3_ARATH BES1/BZR1 homolog protein 3 OS=Arabidopsis thaliana GN=BEH3 PE=1 SV=1//6.53368e-147
	BnaA07g34330D	0.755615	0.70545	4.1004	5.55672	UP	FALSE	FALSE	UP	BEH4; BES1/BZR1 homolog 4	sp|Q9ZV88|BEH4_ARATH BES1/BZR1 homolog protein 4 OS=Arabidopsis thaliana GN=BEH4 PE=1 SV=1//8.82517e-140
	BnaAnng18240D	3.85325	3.4644	11.5912	12.3737	UP	FALSE	FALSE	UP	BEH2; BES1/BZR1-like protein 2	sp|Q94A43|BEH2_ARATH BES1/BZR1 homolog protein 2 OS=Arabidopsis thaliana GN=BEH2 PE=1 SV=1//9.04786e-146
	BnaC01g02070D	7.61109	6.22913	41.3588	44.6151	UP	FALSE	FALSE	UP	BEH2; BES1/BZR1-like protein 2	sp|Q94A43|BEH2_ARATH BES1/BZR1 homolog protein 2 OS=Arabidopsis thaliana GN=BEH2 PE=1 SV=1//8.01355e-145
	BnaC01g11380D	1.88884	2.67773	13.438	18.4864	UP	FALSE	FALSE	UP	BEH3; BES1/BZR1-like protein 3	sp|O49404|BEH3_ARATH BES1/BZR1 homolog protein 3 OS=Arabidopsis thaliana GN=BEH3 PE=1 SV=1//1.4493e-140
	BnaC06g39100D	0.802346	1.0333	1.90446	2.64738	UP	FALSE	FALSE	UP	BEH4; BES1/BZR1 homolog 4	sp|Q9ZV88|BEH4_ARATH BES1/BZR1 homolog protein 4 OS=Arabidopsis thaliana GN=BEH4 PE=1 SV=1//5.91e-150
	BnaC07g35530D	4.35071	4.36562	13.5346	14.8536	UP	FALSE	FALSE	UP	BEH3; BES1/BZR1-like protein 3	sp|O49404|BEH3_ARATH BES1/BZR1 homolog protein 3 OS=Arabidopsis thaliana GN=BEH3 PE=1 SV=1//2.42114e-146
	BnaC07g46250D	8.88086	8.95321	69.3926	52.3841	UP	DOWN	FALSE	UP	BEH2; BES1/BZR1-like protein 2	sp|Q94A43|BEH2_ARATH BES1/BZR1 homolog protein 2 OS=Arabidopsis thaliana GN=BEH2 PE=1 SV=1//8.8195e-144
	BnaCnng34980D	4.64449	4.95637	14.8395	14.9083	UP	FALSE	FALSE	UP	BZR1; brassinazole-resistant 1 protein; K14503 brassinosteroid resistant 1/2	sp|Q8S307|BZR1_ARATH Protein BRASSINAZOLE-RESISTANT 1 OS=Arabidopsis thaliana GN=BZR1 PE=1 SV=1//5.72261e-175
bHLH(61)	BnaA01g00730D	1.51665	4.35944	0.368087	1.10649	DOWN	FALSE	UP	DOWN	SPT; transcription factor SPATULA	sp|Q9FUA4|SPT_ARATH Transcription factor SPATULA OS=Arabidopsis thaliana GN=SPT PE=1 SV=1//7.91962e-127
	BnaA01g02620D	9.27073	7.59536	0.0864195	0.373965	DOWN	FALSE	FALSE	DOWN	CIB1; cryptochrome-interacting basic-helix-loop-helix 1	sp|Q8GY61|BH063_ARATH Transcription factor bHLH63 OS=Arabidopsis thaliana GN=BHLH63 PE=1 SV=1//9.63755e-129
	BnaA01g06170D	1.44936	1.73463	2.52373	3.0062	UP	FALSE	FALSE	UP	LRL2; transcription factor bHLH69	sp|Q8S3D5|BH069_ARATH Transcription factor bHLH69 OS=Arabidopsis thaliana GN=BHLH69 PE=2 SV=2//3.05559e-129
	BnaA03g02340D	3.81624	10.2019	0.393309	1.08084	DOWN	UP	UP	DOWN	BIM1; transcription factor BIM1	sp|Q9LEZ3|BIM1_ARATH Transcription factor BIM1 OS=Arabidopsis thaliana GN=BIM1 PE=1 SV=2//0
	BnaA03g13450D	7.75245	8.6815	0.158585	0.433422	DOWN	FALSE	FALSE	DOWN	transcription factor bHLH137	sp|Q93W88|BH137_ARATH Transcription factor bHLH137 OS=Arabidopsis thaliana GN=BHLH137 PE=2 SV=1//1.56127e-133
	BnaA03g42560D	2.8415	3.74767	10.7146	16.3008	UP	FALSE	FALSE	UP	transcription factor bHLH3	sp|O23487|BH003_ARATH Transcription factor bHLH3 OS=Arabidopsis thaliana GN=BHLH3 PE=2 SV=1//0
	BnaA04g23710D	2.08947	3.20083	3.08192	5.00091	UP	FALSE	FALSE	UP	transcription factor bHLH106	sp|O80674|BH106_ARATH Transcription factor bHLH106 OS=Arabidopsis thaliana GN=BHLH106 PE=2 SV=1//1.5469e-127
	BnaA05g36660D	1.66995	2.93621	0.0366564	0.313242	DOWN	FALSE	FALSE	DOWN	transcription factor bHLH87	sp|Q8S3D2|BH087_ARATH Transcription factor bHLH87 OS=Arabidopsis thaliana GN=BHLH87 PE=2 SV=1//0
	BnaA06g02490D	12.5648	14.4383	38.9876	27.9113	UP	FALSE	FALSE	UP	transcription factor bHLH122	sp|Q9C690|BH122_ARATH Transcription factor bHLH122 OS=Arabidopsis thaliana GN=BHLH122 PE=1 SV=1//0
	BnaA06g24550D	21.6064	19.7101	1.2981	3.12571	DOWN	FALSE	FALSE	DOWN	bHLH093; transcription factor bHLH93	sp|Q9LSL1|BH093_ARATH Transcription factor bHLH93 OS=Arabidopsis thaliana GN=BHLH93 PE=1 SV=1//0
	BnaA06g40330D	17.0287	16.5355	65.3169	61.0806	UP	FALSE	FALSE	UP	JAZ-interacting transcription factor MYC3	sp|Q9FIP9|MYC3_ARATH Transcription factor MYC3 OS=Arabidopsis thaliana GN=MYC3 PE=1 SV=1//3.19636e-86
	BnaA06g40430D	11.4491	15.3164	0.0368973	0.161147	DOWN	FALSE	FALSE	DOWN	bHLH071; transcription factor bHLH71	sp|Q56XR0|BH071_ARATH Transcription factor bHLH71 OS=Arabidopsis thaliana GN=BHLH71 PE=1 SV=1//3.47132e-134
	BnaA07g06260D	6.44928	6.35938	0.296248	0.815049	DOWN	FALSE	FALSE	DOWN	transcription factor bHLH77	sp|Q9LK48|BH077_ARATH Transcription factor bHLH77 OS=Arabidopsis thaliana GN=BHLH77 PE=1 SV=1//6.97462e-147
	BnaA07g12160D	8.63383	11.7672	0.110969	0.672912	DOWN	FALSE	FALSE	DOWN	HEC1; transcription factor HEC1	sp|Q9FHA7|HEC1_ARATH Transcription factor HEC1 OS=Arabidopsis thaliana GN=HEC1 PE=1 SV=1//3.00839e-80
	BnaA07g13690D	0.19715	0.123952	0.88275	1.03128	UP	FALSE	FALSE	UP	FRU; FER-LIKE IRON DEFICIENCY-INDUCED transcription factor	sp|Q0V7X4|FIT_ARATH Transcription factor FER-LIKE IRON DEFICIENCY-INDUCED TRANSCRIPTION FACTOR OS=Arabidopsis thaliana GN=FIT PE=1 SV=1//1.60238e-172
	BnaA07g27570D	16.3691	17.2563	25.4982	21.6982	UP	FALSE	FALSE	UP	transcription factor bHLH49	sp|Q9CAA9|BH049_ARATH Transcription factor bHLH49 OS=Arabidopsis thaliana GN=BHLH49 PE=1 SV=1//0
	BnaA09g07590D	6.77502	7.23856	0.31113	0.909287	DOWN	FALSE	FALSE	DOWN	HEC1; transcription factor HEC1	sp|Q9FHA7|HEC1_ARATH Transcription factor HEC1 OS=Arabidopsis thaliana GN=HEC1 PE=1 SV=1//5.45829e-78
	BnaA09g09600D	7.82724	7.08074	0.034545	0.0862245	DOWN	FALSE	FALSE	DOWN	transcription factor bHLH64	sp|Q9ZPW3|HBI1_ARATH Transcription factor HBI1 OS=Arabidopsis thaliana GN=HBI1 PE=1 SV=3//2.74247e-161
	BnaA09g29410D	11.1081	13.6554	0.308923	1.12121	DOWN	FALSE	FALSE	DOWN	KDR; basic helix-loop-helix protein KIDARI	sp|Q8GW32|PRE6_ARATH Transcription factor PRE6 OS=Arabidopsis thaliana GN=PRE6 PE=1 SV=1//2.61867e-40
	BnaA09g41470D	0.524613	0.723819	1.57805	2.18786	UP	FALSE	FALSE	UP	LRL1; bHLH protein LJRHL1-like 1	sp|Q9ZUG9|BH066_ARATH Transcription factor bHLH66 OS=Arabidopsis thaliana GN=BHLH66 PE=2 SV=1//1.46916e-135
	BnaA09g48450D	9.26024	5.26045	8.57938	6.61307	UP	FALSE	DOWN	UP	PIF3; transcription factor PIF3; K12126 phytochrome-interacting factor 3	sp|O80536|PIF3_ARATH Transcription factor PIF3 OS=Arabidopsis thaliana GN=PIF3 PE=1 SV=1//0
	BnaA10g03540D	9.2544	10.6535	55.5646	61.9024	UP	FALSE	FALSE	UP	transcription factor bHLH128	sp|Q8H102|BH128_ARATH Transcription factor bHLH128 OS=Arabidopsis thaliana GN=BHLH128 PE=1 SV=1//2.38773e-168
	BnaA10g06580D	3.79623	3.80821	0.0673687	0.185138	DOWN	FALSE	FALSE	DOWN	SPCH; transcription factor SPEECHLESS	sp|Q700C7|SPCH_ARATH Transcription factor SPEECHLESS OS=Arabidopsis thaliana GN=SPCH PE=1 SV=1//1.24959e-160
	BnaA10g11180D	1.17509	1.68484	2.41835	2.89764	UP	FALSE	FALSE	UP	transcription factor bHLH35	sp|Q2HIV9|BH035_ARATH Transcription factor bHLH35 OS=Arabidopsis thaliana GN=BHLH35 PE=2 SV=1//1.19667e-136
	BnaA10g23230D	9.69476	12.9081	0.608452	1.40461	DOWN	UP	FALSE	DOWN	BIM1; transcription factor BIM1	sp|Q9LEZ3|BIM1_ARATH Transcription factor BIM1 OS=Arabidopsis thaliana GN=BIM1 PE=1 SV=2//0
	BnaAnng19120D	16.9334	18.7615	1.85373	6.55416	DOWN	UP	FALSE	DOWN	HEC1; transcription factor HEC1	sp|Q9FHA7|HEC1_ARATH Transcription factor HEC1 OS=Arabidopsis thaliana GN=HEC1 PE=1 SV=1//5.31978e-85
	BnaC01g17320D	1.09412	1.15401	4.09125	3.73108	UP	FALSE	FALSE	UP	transcription factor bHLH126	sp|Q9STJ6|BH126_ARATH Transcription factor bHLH126 OS=Arabidopsis thaliana GN=BHLH126 PE=2 SV=1//1.94805e-117
	BnaC01g26610D	1.48356	3.21462	0.025826	0.472149	DOWN	FALSE	FALSE	DOWN	HEC2; transcription factor HEC2	sp|Q9SND4|HEC2_ARATH Transcription factor HEC2 OS=Arabidopsis thaliana GN=HEC2 PE=1 SV=1//1.40155e-91
	BnaC01g29610D	3.79231	3.56135	5.00164	5.83399	UP	FALSE	FALSE	UP	transcription factor bHLH112	sp|Q94JL3|BH112_ARATH Transcription factor bHLH112 OS=Arabidopsis thaliana GN=BHLH112 PE=2 SV=1//0
	BnaC01g40740D	0.725728	1.25201	45.7655	37.9395	UP	FALSE	FALSE	UP	bHLH11; transcription factor bHLH11	sp|Q8W2F2|BH011_ARATH Transcription factor bHLH11 OS=Arabidopsis thaliana GN=BHLH11 PE=2 SV=2//2.59509e-68
	BnaC02g11040D	0.0398361	0.0358776	4.24919	4.66272	UP	FALSE	FALSE	UP	LRL3; bHLH protein LJRHL1-like 3	sp|Q9LSQ3|BH082_ARATH Transcription factor bHLH82 OS=Arabidopsis thaliana GN=BHLH82 PE=2 SV=1//2.49866e-121
	BnaC03g43470D	7.19158	7.56719	11.5752	13.0997	UP	FALSE	FALSE	UP	FMA; transcription factor FAMA	sp|Q56YJ8|FAMA_ARATH Transcription factor FAMA OS=Arabidopsis thaliana GN=FAMA PE=1 SV=1//0
	BnaC03g61610D	2.04477	2.48058	0.584771	1.65221	FALSE	UP	FALSE	DOWN	SPT; transcription factor SPATULA	sp|Q9FUA4|SPT_ARATH Transcription factor SPATULA OS=Arabidopsis thaliana GN=SPT PE=1 SV=1//2.78608e-138
	BnaC04g00610D	5.02779	5.25695	0.333117	0.93523	DOWN	FALSE	FALSE	DOWN	transcription factor bHLH70	sp|O81037|BH070_ARATH Transcription factor bHLH70 OS=Arabidopsis thaliana GN=BHLH70 PE=2 SV=1//5.48941e-125
	BnaC04g01630D	1.66994	1.64104	0.0468957	0.122171	DOWN	FALSE	FALSE	DOWN	transcription factor bHLH106	sp|O80674|BH106_ARATH Transcription factor bHLH106 OS=Arabidopsis thaliana GN=BHLH106 PE=2 SV=1//1.13474e-117
	BnaC04g13520D	0.872689	1.00729	0.0274408	0.237665	DOWN	FALSE	FALSE	DOWN	transcription factor bHLH10	sp|Q84TK1|BH010_ARATH Transcription factor bHLH10 OS=Arabidopsis thaliana GN=BHLH10 PE=2 SV=1//4.07207e-169
	BnaC04g48190D	4.72357	4.93163	3.24823	6.32804	UP	FALSE	FALSE	FALSE	transcription factor bHLH130	sp|Q66GR3|BH130_ARATH Transcription factor bHLH130 OS=Arabidopsis thaliana GN=BHLH130 PE=1 SV=1//6.0498e-175
	BnaC04g52120D	6.6376	4.7796	16.0283	18.0137	UP	FALSE	FALSE	UP	AIB; transcription factor ABA-INDUCIBLE bHLH-TYPE	sp|Q9ZPY8|AIB_ARATH Transcription factor ABA-INDUCIBLE bHLH-TYPE OS=Arabidopsis thaliana GN=AIB PE=2 SV=2//0
	BnaC04g56860D	2.75403	3.19859	5.0663	5.47512	UP	FALSE	FALSE	UP	transcription factor bHLH106	sp|O80674|BH106_ARATH Transcription factor bHLH106 OS=Arabidopsis thaliana GN=BHLH106 PE=2 SV=1//2.26607e-127
	BnaC05g03920D	2.77129	3.17159	9.08644	9.32023	UP	FALSE	FALSE	UP	transcription factor bHLH128	sp|Q8H102|BH128_ARATH Transcription factor bHLH128 OS=Arabidopsis thaliana GN=BHLH128 PE=1 SV=1//8.3036e-152
	BnaC05g07950D	8.66568	7.40134	20.4489	16.2233	UP	FALSE	FALSE	UP	BPEp; transcription factor BPE	sp|Q0JXE7|BPE_ARATH Transcription factor BPE OS=Arabidopsis thaliana GN=BPE PE=2 SV=1//1.4824e-97
	BnaC05g27050D	16.4263	15.3719	34.2014	32.7955	UP	FALSE	FALSE	UP	bHLH115; transcription factor bHLH115	sp|Q9C682|BH115_ARATH Transcription factor bHLH115 OS=Arabidopsis thaliana GN=BHLH115 PE=2 SV=1//2.51057e-143
	BnaC06g04380D	22.158	24.2173	160.101	127.281	UP	DOWN	FALSE	UP	transcription factor bHLH122	sp|Q9C690|BH122_ARATH Transcription factor bHLH122 OS=Arabidopsis thaliana GN=BHLH122 PE=1 SV=1//0
	BnaC07g12550D	2.2135	1.71889	0.058743	0.189267	FALSE	FALSE	FALSE	DOWN	KDR; basic helix-loop-helix protein KIDARI	sp|Q8GW32|PRE6_ARATH Transcription factor PRE6 OS=Arabidopsis thaliana GN=PRE6 PE=1 SV=1//8.79907e-41
	BnaC07g16340D	1.96337	2.72024	0.0764464	0.26859	DOWN	FALSE	FALSE	DOWN	HEC1; transcription factor HEC1	sp|Q9FHA7|HEC1_ARATH Transcription factor HEC1 OS=Arabidopsis thaliana GN=HEC1 PE=1 SV=1//6.07892e-70
	BnaC07g19360D	13.348	14.2464	0.0531214	0.202797	DOWN	FALSE	FALSE	DOWN	bHLH071; transcription factor bHLH71	sp|Q56XR0|BH071_ARATH Transcription factor bHLH71 OS=Arabidopsis thaliana GN=BHLH71 PE=1 SV=1//5.01366e-143
	BnaC07g19420D	20.3002	21.8196	100.124	98.844	UP	FALSE	FALSE	UP	JAZ-interacting transcription factor MYC3	sp|Q9FIP9|MYC3_ARATH Transcription factor MYC3 OS=Arabidopsis thaliana GN=MYC3 PE=1 SV=1//1.77282e-83
	BnaC07g33660D	1.93562	1.97731	3.23825	3.57969	UP	FALSE	FALSE	UP	transcription factor bHLH3	sp|O23487|BH003_ARATH Transcription factor bHLH3 OS=Arabidopsis thaliana GN=BHLH3 PE=2 SV=1//0
	BnaC07g45960D	0.167282	0.673182	2.67928	2.93652	UP	FALSE	FALSE	UP	bHLH11; transcription factor bHLH11	sp|Q8W2F2|BH011_ARATH Transcription factor bHLH11 OS=Arabidopsis thaliana GN=BHLH11 PE=2 SV=2//1.23188e-80
	BnaC08g07580D	1.64446	1.31908	8.56033	8.11312	UP	FALSE	FALSE	UP	MYC2; transcription factor MYC2; K13422 transcription factor MYC2	sp|Q39204|MYC2_ARATH Transcription factor MYC2 OS=Arabidopsis thaliana GN=MYC2 PE=1 SV=2//0
	BnaC08g42700D	3.52228	6.12036	3.53912	8.84857	UP	UP	UP	UP	PIF3; transcription factor PIF3; K12126 phytochrome-interacting factor 3	sp|O80536|PIF3_ARATH Transcription factor PIF3 OS=Arabidopsis thaliana GN=PIF3 PE=1 SV=1//0
	BnaC08g49690D	1.32627	0.63447	0.836032	2.0908	UP	FALSE	FALSE	FALSE	HFR1; transcription factor HFR1	sp|Q9FE22|HFR1_ARATH Transcription factor HFR1 OS=Arabidopsis thaliana GN=HFR1 PE=1 SV=1//3.72548e-129
	BnaC09g07530D	13.9824	17.5363	0.449685	2.7327	DOWN	UP	FALSE	DOWN	HEC1; transcription factor HEC1	sp|Q9FHA7|HEC1_ARATH Transcription factor HEC1 OS=Arabidopsis thaliana GN=HEC1 PE=1 SV=1//2.28739e-78
	BnaC09g10990D	6.16058	7.52698	0.0925987	0.396533	DOWN	FALSE	FALSE	DOWN	transcription factor bHLH125	sp|Q9LQ08|BH125_ARATH Transcription factor bHLH125 OS=Arabidopsis thaliana GN=BHLH125 PE=2 SV=1//3.02182e-96
	BnaC09g11380D	2.25773	2.46636	0.009655	0.0710359	DOWN	FALSE	FALSE	DOWN	EGL3; transcription factor EGL1	sp|Q9CAD0|EGL1_ARATH Transcription factor EGL1 OS=Arabidopsis thaliana GN=BHLH2 PE=1 SV=1//0
	BnaC09g29480D	1.1463	1.30455	0.0172409	0.0664646	DOWN	FALSE	FALSE	DOWN	SPCH; transcription factor SPEECHLESS	sp|Q700C7|SPCH_ARATH Transcription factor SPEECHLESS OS=Arabidopsis thaliana GN=SPCH PE=1 SV=1//2.06244e-153
	BnaC09g31010D	27.0569	28.6028	82.9875	83.0723	UP	FALSE	FALSE	UP	ILR3; transcription factor ILR3	sp|Q9FH37|ILR3_ARATH Transcription factor ILR3 OS=Arabidopsis thaliana GN=ILR3 PE=1 SV=1//8.47934e-118
	BnaCnng37600D	3.46725	4.23931	0.557112	1.41964	DOWN	FALSE	FALSE	DOWN	protein FLOWERING BHLH 1	sp|Q9C8P8|BH080_ARATH Transcription factor bHLH80 OS=Arabidopsis thaliana GN=BHLH80 PE=2 SV=1//5.45033e-106
	BnaCnng39760D	0.04055	0.0185256	0.985997	1.06134	UP	FALSE	FALSE	UP	LRL3; bHLH protein LJRHL1-like 3	sp|Q9LSQ3|BH082_ARATH Transcription factor bHLH82 OS=Arabidopsis thaliana GN=BHLH82 PE=2 SV=1//6.92972e-98
	BnaCnng61200D	3.04112	3.27394	0.0649286	0.264365	DOWN	FALSE	FALSE	DOWN	BNQ2; protein banquo 2	sp|Q9LXG5|PRE2_ARATH Transcription factor PRE2 OS=Arabidopsis thaliana GN=PRE2 PE=1 SV=1//6.48019e-43
	BnaCnng66320D	3.68253	3.67068	3.82787	4.95766	UP	FALSE	FALSE	UP	transcription factor bHLH13	sp|Q9LNJ5|BH013_ARATH Transcription factor bHLH13 OS=Arabidopsis thaliana GN=BHLH13 PE=2 SV=1//1.67101e-109
BSD(4)	BnaA04g07070D	5.04618	4.38732	39.0541	37.0241	UP	FALSE	FALSE	UP	BSD domain-containing protein	sp|Q5ZIK6|BSDC1_CHICK BSD domain-containing protein 1 OS=Gallus gallus GN=BSDC1 PE=2 SV=1//4.89958e-19
	BnaA07g05220D	7.00269	7.70123	6.63745	9.71355	UP	FALSE	FALSE	FALSE	BSD domain-containing protein	-//-
	BnaAnng17490D	7.7041	13.0296	18.0625	21.4694	UP	FALSE	UP	UP	BSD domain-containing protein	-//-
	BnaCnng14710D	4.96498	4.75642	32.1005	31.7075	UP	FALSE	FALSE	UP	BSD domain-containing protein	sp|Q5ZIK6|BSDC1_CHICK BSD domain-containing protein 1 OS=Gallus gallus GN=BSDC1 PE=2 SV=1//9.15716e-18
bZIP(76)	BnaA01g00310D	0.235731	0.83659	1.30777	2.43505	UP	FALSE	FALSE	UP	bZIP7; basic leucine-zipper 7	-//-
	BnaA01g01100D	3.38034	6.91081	35.9267	68.2296	UP	UP	UP	UP	GBF1; G-box binding factor 1; K09060 plant G-box-binding factor	sp|P42774|GBF1_ARATH G-box-binding factor 1 OS=Arabidopsis thaliana GN=GBF1 PE=2 SV=2//1.79153e-168
	BnaA01g02570D	4.29217	4.6692	31.4987	20.7669	UP	DOWN	FALSE	UP	GBF6; G-box binding factor 6	sp|P24068|OCS1_MAIZE Ocs element-binding factor 1 OS=Zea mays GN=OBF1 PE=2 SV=2//1.07271e-17
	BnaA01g26200D	3.47168	3.61768	17.5978	11.7723	UP	FALSE	FALSE	UP	ABF4; ABRE binding factor 4; K14432 ABA responsive element binding factor	sp|Q9M7Q2|AI5L7_ARATH ABSCISIC ACID-INSENSITIVE 5-like protein 7 OS=Arabidopsis thaliana GN=ABF4 PE=1 SV=1//1.59569e-56
	BnaA01g27940D	1.76144	1.98694	10.9786	10.0118	UP	FALSE	FALSE	UP	HYH; transcription factor HY5-like protein	sp|Q8W191|HYH_ARATH Transcription factor HY5-like OS=Arabidopsis thaliana GN=HYH PE=1 SV=1//6.09644e-49
	BnaA01g31420D	5.37741	6.1783	13.8255	13.5643	UP	FALSE	FALSE	UP	BZIP28; putative bZIP transcription factor	sp|Q9SG86|BZP28_ARATH bZIP transcription factor 28 OS=Arabidopsis thaliana GN=BZIP28 PE=1 SV=1//1.21766e-51
	BnaA02g31000D	3.53246	1.8742	4.35886	4.41964	UP	FALSE	DOWN	UP	BZO2H3; basic leucine zipper 63	sp|B9DGI8|BZP63_ARATH Basic leucine zipper 63 OS=Arabidopsis thaliana GN=BZIP63 PE=1 SV=1//2.99574e-149
	BnaA02g32330D	1.05537	1.00967	2.16725	1.67044	UP	FALSE	FALSE	UP	BZIP9; basic leucine zipper 9	sp|Q9FUD3|BZIP9_ARATH Basic leucine zipper 9 OS=Arabidopsis thaliana GN=BZIP9 PE=1 SV=1//7.84347e-154
	BnaA03g18190D	17.3792	18.982	19.7469	28.7428	UP	FALSE	FALSE	UP	BZO2H1; basic leucine zipper 10	sp|Q9M1G6|BZP25_ARATH Basic leucine zipper 25 OS=Arabidopsis thaliana GN=BZIP25 PE=1 SV=1//1.95543e-64
	BnaA03g35190D	0.990684	0.983854	1.43389	1.56872	UP	FALSE	FALSE	UP	ABF1; abscisic acid-insensitive 5-like protein 4; K14432 ABA responsive element binding factor	sp|Q9M7Q2|AI5L7_ARATH ABSCISIC ACID-INSENSITIVE 5-like protein 7 OS=Arabidopsis thaliana GN=ABF4 PE=1 SV=1//7.43407e-157
	BnaA03g39300D	15.0981	15.8149	59.1959	51.5607	UP	FALSE	FALSE	UP	bZIP23; transcription factor bZIP23	-//-
	BnaA03g56410D	1.18332	1.00515	0.0737727	0.167818	DOWN	FALSE	FALSE	DOWN	bZIP16; basic region/leucine zipper transcription factor 16; K09060 plant G-box-binding factor	sp|P23922|HBP1A_WHEAT Transcription factor HBP-1a OS=Triticum aestivum PE=2 SV=1//8.29482e-27
	BnaA04g12020D	15.9525	15.9257	35.9545	31.9323	UP	FALSE	FALSE	UP	Basic-leucine zipper (bZIP) transcription factor family protein	sp|Q04088|POF21_ARATH Probable transcription factor PosF21 OS=Arabidopsis thaliana GN=POSF21 PE=2 SV=1//1.49777e-40
	BnaA04g23690D	1.78208	1.78466	2.67015	2.67751	UP	FALSE	FALSE	UP	EEL; ABI5-like transcription factor EEL; K14432 ABA responsive element binding factor	sp|Q9C5Q2|AI5L3_ARATH ABSCISIC ACID-INSENSITIVE 5-like protein 3 OS=Arabidopsis thaliana GN=DPBF4 PE=1 SV=1//4.24013e-133
	BnaA05g01520D	5.03501	4.62311	79.0894	74.5975	UP	FALSE	FALSE	UP	GBF3; G-box binding factor 3; K09060 plant G-box-binding factor	sp|P42776|GBF3_ARATH G-box-binding factor 3 OS=Arabidopsis thaliana GN=GBF3 PE=1 SV=2//7.11665e-173
	BnaA05g08020D	6.06467	6.32578	93.6221	66.97	UP	DOWN	FALSE	UP	ABI5; protein abscisic acid-insensitive 5; K14432 ABA responsive element binding factor	sp|Q9SJN0|ABI5_ARATH Protein ABSCISIC ACID-INSENSITIVE 5 OS=Arabidopsis thaliana GN=ABI5 PE=1 SV=1//7.86001e-158
	BnaA05g08520D	1.39492	1.96797	3.14793	3.65456	UP	FALSE	FALSE	UP	bZIP16; basic region/leucine zipper transcription factor 16; K09060 plant G-box-binding factor	sp|P42774|GBF1_ARATH G-box-binding factor 1 OS=Arabidopsis thaliana GN=GBF1 PE=2 SV=2//5.8043e-29
	BnaA05g22650D	1.5987	1.37145	0.0389956	0.233727	FALSE	FALSE	FALSE	DOWN	HYH; transcription factor HY5-like protein	sp|Q8W191|HYH_ARATH Transcription factor HY5-like OS=Arabidopsis thaliana GN=HYH PE=1 SV=1//4.53036e-72
	BnaA06g13700D	0.61154	0.720635	8.77321	9.76954	UP	FALSE	FALSE	UP	basic-leucine zipper transcription factor family protein	-//-
	BnaA06g24140D	2.26487	1.99371	9.43292	8.53031	UP	FALSE	FALSE	UP	TGA1; transcription factor TGA1; K14431 transcription factor TGA	sp|Q39237|TGA1_ARATH Transcription factor TGA1 OS=Arabidopsis thaliana GN=TGA1 PE=1 SV=2//0
	BnaA06g25370D	2.60737	3.68774	0.38513	1.03417	DOWN	FALSE	FALSE	DOWN	bZIP2; basic leucine-zipper 2	sp|P24068|OCS1_MAIZE Ocs element-binding factor 1 OS=Zea mays GN=OBF1 PE=2 SV=2//1.26439e-18
	BnaA06g29270D	4.6673	3.56502	12.2394	12.5081	UP	FALSE	FALSE	UP	BZO2H3; basic leucine zipper 63	sp|B9DGI8|BZP63_ARATH Basic leucine zipper 63 OS=Arabidopsis thaliana GN=BZIP63 PE=1 SV=1//2.30461e-135
	BnaA06g29500D	4.43139	3.44501	11.1148	20.6024	UP	UP	FALSE	UP	bZIP1; basic leucine-zipper 1	sp|Q9FGX2|BZIP1_ARATH Basic leucine zipper 1 OS=Arabidopsis thaliana GN=BZIP1 PE=1 SV=1//7.02703e-71
	BnaA06g36330D	8.05696	8.4991	20.3488	20.0977	UP	FALSE	FALSE	UP	basic leucine zipper transcription factor; K14432 ABA responsive element binding factor	sp|P42777|GBF4_ARATH G-box-binding factor 4 OS=Arabidopsis thaliana GN=GBF4 PE=1 SV=1//4.63988e-42
	BnaA07g19330D	3.25479	3.63762	21.8274	19.7137	UP	FALSE	FALSE	UP	BZIP53; basic region/leucine zipper motif 53 protein	sp|P24068|OCS1_MAIZE Ocs element-binding factor 1 OS=Zea mays GN=OBF1 PE=2 SV=2//5.34292e-28
	BnaA07g20770D	2.04167	1.89879	8.96106	10.7597	UP	FALSE	FALSE	UP	transcription factor TGA7; K14431 transcription factor TGA	sp|Q93ZE2|TGA7_ARATH Transcription factor TGA7 OS=Arabidopsis thaliana GN=TGA7 PE=1 SV=1//0
	BnaA07g21710D	4.75951	6.75284	0.586256	1.65724	DOWN	FALSE	FALSE	DOWN	bZIP44; basic leucine-zipper 44	sp|P24068|OCS1_MAIZE Ocs element-binding factor 1 OS=Zea mays GN=OBF1 PE=2 SV=2//1.52857e-16
	BnaA08g04620D	22.9855	24.1539	643.244	695.438	UP	FALSE	FALSE	UP	BZIP60; bZIP transcription factor 60	sp|Q9C7S0|BZP60_ARATH bZIP transcription factor 60 OS=Arabidopsis thaliana GN=BZIP60 PE=1 SV=1//3.91252e-24
	BnaA08g04710D	1.45323	1.22047	0.257478	0.558506	FALSE	FALSE	FALSE	DOWN	VIP1; VIRE2-interacting protein 1	sp|Q9MA75|VIP1_ARATH Transcription factor VIP1 OS=Arabidopsis thaliana GN=VIP1 PE=1 SV=1//1.66256e-86
	BnaA08g10920D	14.9741	14.2809	30.5665	28.4807	UP	FALSE	FALSE	UP	bZIP19; transcription factor bZIP19	-//-
	BnaA08g15400D	5.50371	5.24206	25.7737	19.7206	UP	DOWN	FALSE	UP	GBF1; G-box binding factor 1; K09060 plant G-box-binding factor	sp|P42774|GBF1_ARATH G-box-binding factor 1 OS=Arabidopsis thaliana GN=GBF1 PE=2 SV=2//2.2186e-163
	BnaA08g16860D	4.87751	5.70018	0.0793546	0.241148	DOWN	FALSE	FALSE	DOWN	Basic-leucine zipper (bZIP) transcription factor family protein	sp|Q6S4P4|RF2B_ORYSJ Transcription factor RF2b OS=Oryza sativa subsp. japonica GN=RF2b PE=1 SV=2//2.42148e-45
	BnaA09g00170D	8.60683	9.51084	42.4468	37.008	UP	FALSE	FALSE	UP	GBF2; basic leucine zipper transcription factor; K09060 plant G-box-binding factor	sp|P42775|GBF2_ARATH G-box-binding factor 2 OS=Arabidopsis thaliana GN=GBF2 PE=1 SV=1//3.72406e-130
	BnaA09g03330D	2.55416	2.41958	104.555	84.8731	UP	FALSE	FALSE	UP	bZIP1; basic leucine-zipper 1	sp|Q9FGX2|BZIP1_ARATH Basic leucine zipper 1 OS=Arabidopsis thaliana GN=BZIP1 PE=1 SV=1//1.79551e-72
	BnaA09g24670D	2.93238	2.61625	12.8003	14.6986	UP	FALSE	FALSE	UP	BZIP28; putative bZIP transcription factor	sp|Q9SG86|BZP28_ARATH bZIP transcription factor 28 OS=Arabidopsis thaliana GN=BZIP28 PE=1 SV=1//0
	BnaA09g34460D	18.7628	18.3245	44.7349	42.6527	UP	FALSE	FALSE	UP	BZIP25; basic leucine zipper 25	sp|Q9M1G6|BZP25_ARATH Basic leucine zipper 25 OS=Arabidopsis thaliana GN=BZIP25 PE=1 SV=1//8.12445e-138
	BnaA09g39870D	39.1526	31.6895	120.731	93.0881	UP	FALSE	FALSE	UP	BZIP53; basic region/leucine zipper motif 53 protein	sp|P24068|OCS1_MAIZE Ocs element-binding factor 1 OS=Zea mays GN=OBF1 PE=2 SV=2//1.08195e-27
	BnaA10g02300D	5.31476	4.93657	10.0972	8.96975	UP	FALSE	FALSE	UP	GBF4; G-box binding factor 4; K14432 ABA responsive element binding factor	sp|P42777|GBF4_ARATH G-box-binding factor 4 OS=Arabidopsis thaliana GN=GBF4 PE=1 SV=1//1.77699e-98
	BnaA10g28780D	13.2833	13.3659	20.5513	20.3962	UP	FALSE	FALSE	UP	ABF2; abscisic acid responsive elements-binding factor 2; K14432 ABA responsive element binding factor	sp|Q9M7Q4|AI5L5_ARATH ABSCISIC ACID-INSENSITIVE 5-like protein 5 OS=Arabidopsis thaliana GN=ABF2 PE=1 SV=1//5.76318e-50
	BnaAnng07530D	1.02533	0.756208	4.83358	3.70055	UP	FALSE	FALSE	UP	ABI5; protein abscisic acid-insensitive 5; K14432 ABA responsive element binding factor	sp|Q9SJN0|ABI5_ARATH Protein ABSCISIC ACID-INSENSITIVE 5 OS=Arabidopsis thaliana GN=ABI5 PE=1 SV=1//8.27584e-65
	BnaAnng11690D	1.62585	3.64237	0.539816	0.860733	DOWN	FALSE	FALSE	FALSE	bZIP19; transcription factor bZIP19	-//-
	BnaAnng26550D	26.1503	22.3548	118.083	164.666	UP	FALSE	FALSE	UP	ABF3; abscisic acid responsive elements-binding factor 3; K14432 ABA responsive element binding factor	sp|Q9M7Q3|AI5L6_ARATH ABSCISIC ACID-INSENSITIVE 5-like protein 6 OS=Arabidopsis thaliana GN=ABF3 PE=1 SV=1//6.59809e-168
	BnaAnng39310D	1.06615	1.0114	3.31862	3.01388	UP	FALSE	FALSE	UP	VIP1; VIRE2-interacting protein 1	sp|Q9MA75|VIP1_ARATH Transcription factor VIP1 OS=Arabidopsis thaliana GN=VIP1 PE=1 SV=1//2.81431e-106
	BnaC01g02130D	13.8486	12.9039	165.986	139.552	UP	FALSE	FALSE	UP	GBF1; G-box binding factor 1; K09060 plant G-box-binding factor	sp|P42774|GBF1_ARATH G-box-binding factor 1 OS=Arabidopsis thaliana GN=GBF1 PE=2 SV=2//4.42191e-160
	BnaC01g03810D	2.91005	2.8683	11.5877	9.3609	UP	FALSE	FALSE	UP	GBF6; G-box binding factor 6	sp|P24068|OCS1_MAIZE Ocs element-binding factor 1 OS=Zea mays GN=OBF1 PE=2 SV=2//2.80495e-18
	BnaC01g04330D	29.8037	27.9949	291.91	315.876	UP	FALSE	FALSE	UP	ABF3; abscisic acid responsive elements-binding factor 3; K14432 ABA responsive element binding factor	sp|Q9M7Q3|AI5L6_ARATH ABSCISIC ACID-INSENSITIVE 5-like protein 6 OS=Arabidopsis thaliana GN=ABF3 PE=1 SV=1//7.34354e-61
	BnaC01g43800D	10.4103	11.2874	34.6773	23.0005	UP	DOWN	FALSE	UP	ABF4; ABRE binding factor 4; K14432 ABA responsive element binding factor	sp|Q9M7Q2|AI5L7_ARATH ABSCISIC ACID-INSENSITIVE 5-like protein 7 OS=Arabidopsis thaliana GN=ABF4 PE=1 SV=1//1.14256e-50
	BnaC02g39310D	22.5607	16.5339	32.9026	31.2712	UP	FALSE	FALSE	UP	BZO2H3; basic leucine zipper 63	sp|B9DGI8|BZP63_ARATH Basic leucine zipper 63 OS=Arabidopsis thaliana GN=BZIP63 PE=1 SV=1//2.73196e-156
	BnaC02g41050D	1.48541	1.21962	1.98983	2.4642	UP	FALSE	FALSE	UP	BZIP9; basic leucine zipper 9	sp|Q9FUD3|BZIP9_ARATH Basic leucine zipper 9 OS=Arabidopsis thaliana GN=BZIP9 PE=1 SV=1//5.47971e-153
	BnaC02g43620D	0.895522	0.965768	6.28425	5.63902	UP	FALSE	FALSE	UP	TGA1; transcription factor TGA1; K14431 transcription factor TGA	sp|Q39237|TGA1_ARATH Transcription factor TGA1 OS=Arabidopsis thaliana GN=TGA1 PE=1 SV=2//0
	BnaC03g46620D	12.3989	12.7265	57.0237	46.4251	UP	FALSE	FALSE	UP	bZIP23; transcription factor bZIP23	-//-
	BnaC03g49070D	3.01498	3.4887	6.74628	7.88452	UP	FALSE	FALSE	UP	TGA1; transcription factor TGA1; K14431 transcription factor TGA	sp|Q39237|TGA1_ARATH Transcription factor TGA1 OS=Arabidopsis thaliana GN=TGA1 PE=1 SV=2//0
	BnaC03g61840D	7.44513	7.51276	30.1764	22.1031	UP	DOWN	FALSE	UP	GBF1; G-box binding factor 1; K09060 plant G-box-binding factor	sp|P42774|GBF1_ARATH G-box-binding factor 1 OS=Arabidopsis thaliana GN=GBF1 PE=2 SV=2//1.0229e-162
	BnaC04g01070D	5.66309	4.8932	132.254	101.912	UP	DOWN	FALSE	UP	GBF3; G-box binding factor 3; K09060 plant G-box-binding factor	sp|P42776|GBF3_ARATH G-box-binding factor 3 OS=Arabidopsis thaliana GN=GBF3 PE=1 SV=2//2.13142e-179
	BnaC04g09030D	3.85952	5.13756	51.0634	46.1469	UP	FALSE	FALSE	UP	ABI5; protein abscisic acid-insensitive 5; K14432 ABA responsive element binding factor	sp|Q9SJN0|ABI5_ARATH Protein ABSCISIC ACID-INSENSITIVE 5 OS=Arabidopsis thaliana GN=ABI5 PE=1 SV=1//8.76937e-158
	BnaC04g33670D	14.3795	14.6255	24.9257	18.9858	UP	DOWN	FALSE	UP	Basic-leucine zipper (bZIP) transcription factor family protein	sp|Q6S4P4|RF2B_ORYSJ Transcription factor RF2b OS=Oryza sativa subsp. japonica GN=RF2b PE=1 SV=2//3.17866e-41
	BnaC04g56840D	6.50401	6.97707	12.6797	13.1815	UP	FALSE	FALSE	UP	EEL; ABI5-like transcription factor EEL; K14432 ABA responsive element binding factor	sp|Q9C5Q2|AI5L3_ARATH ABSCISIC ACID-INSENSITIVE 5-like protein 3 OS=Arabidopsis thaliana GN=DPBF4 PE=1 SV=1//2.49887e-129
	BnaC05g02200D	3.71414	3.48915	17.0526	18.7046	UP	FALSE	FALSE	UP	GBF4; G-box binding factor 4; K14432 ABA responsive element binding factor	sp|P42777|GBF4_ARATH G-box-binding factor 4 OS=Arabidopsis thaliana GN=GBF4 PE=1 SV=1//1.49768e-96
	BnaC05g15020D	0.498036	0.861261	17.0789	19.0704	UP	FALSE	FALSE	UP	basic-leucine zipper transcription factor family protein	-//-
	BnaC05g17700D	12.533	12.6254	17.6428	20.5914	UP	FALSE	FALSE	UP	TGA3; transcription factor TGA3; K14431 transcription factor TGA	sp|Q39234|TGA3_ARATH Transcription factor TGA3 OS=Arabidopsis thaliana GN=TGA3 PE=1 SV=1//0
	BnaC05g33570D	6.80916	6.53152	24.7452	18.614	UP	DOWN	FALSE	UP	ABF1; abscisic acid-insensitive 5-like protein 4; K14432 ABA responsive element binding factor	sp|Q9M7Q5|AI5L4_ARATH ABSCISIC ACID-INSENSITIVE 5-like protein 4 OS=Arabidopsis thaliana GN=ABF1 PE=1 SV=1//1.1818e-99
	BnaC05g51490D	12.8236	14.4778	34.2292	35.0422	UP	FALSE	FALSE	UP	VIP1; VIRE2-interacting protein 1	sp|Q9MA75|VIP1_ARATH Transcription factor VIP1 OS=Arabidopsis thaliana GN=VIP1 PE=1 SV=1//2.31073e-149
	BnaC06g18530D	33.5853	30.9975	173.824	144.956	UP	FALSE	FALSE	UP	BZIP53; basic region/leucine zipper motif 53 protein	sp|P24068|OCS1_MAIZE Ocs element-binding factor 1 OS=Zea mays GN=OBF1 PE=2 SV=2//1.5204e-28
	BnaC07g27220D	15.8891	11.7523	34.0194	40.421	UP	FALSE	FALSE	UP	bZIP1; basic leucine-zipper 1	sp|Q9FGX2|BZIP1_ARATH Basic leucine zipper 1 OS=Arabidopsis thaliana GN=BZIP1 PE=1 SV=1//2.89149e-72
	BnaC07g27440D	3.70682	2.12269	84.0725	77.0059	UP	FALSE	DOWN	UP	BZO2H3; basic leucine zipper 63	sp|B9DGI8|BZP63_ARATH Basic leucine zipper 63 OS=Arabidopsis thaliana GN=BZIP63 PE=1 SV=1//1.67513e-151
	BnaC07g44670D	13.5795	11.8215	294.423	235.797	UP	FALSE	FALSE	UP	ABF3; abscisic acid responsive elements-binding factor 3; K14432 ABA responsive element binding factor	sp|Q9M7Q3|AI5L6_ARATH ABSCISIC ACID-INSENSITIVE 5-like protein 6 OS=Arabidopsis thaliana GN=ABF3 PE=1 SV=1//6.73492e-174
	BnaC07g47540D	11.6518	9.7495	30.0952	30.3344	UP	FALSE	FALSE	UP	Basic-leucine zipper (bZIP) transcription factor family protein	sp|Q6S4P4|RF2B_ORYSJ Transcription factor RF2b OS=Oryza sativa subsp. japonica GN=RF2b PE=1 SV=2//1.04646e-34
	BnaC08g05600D	14.756	15.0855	458.611	451.245	UP	FALSE	FALSE	UP	BZIP60; bZIP transcription factor 60	sp|Q9C7S0|BZP60_ARATH bZIP transcription factor 60 OS=Arabidopsis thaliana GN=BZIP60 PE=1 SV=1//1.7303e-23
	BnaC08g20170D	0.0434577	0.0298955	2.64612	4.94814	UP	FALSE	FALSE	UP	TGA3; transcription factor TGA3; K14431 transcription factor TGA	sp|Q39234|TGA3_ARATH Transcription factor TGA3 OS=Arabidopsis thaliana GN=TGA3 PE=1 SV=1//0
	BnaC08g25370D	21.0847	21.9921	49.9304	42.6506	UP	FALSE	FALSE	UP	BZIP25; basic leucine zipper 25	sp|Q9M1G6|BZP25_ARATH Basic leucine zipper 25 OS=Arabidopsis thaliana GN=BZIP25 PE=1 SV=1//7.03774e-134
	BnaC09g45380D	14.0466	13.7625	19.6312	17.6562	UP	FALSE	FALSE	UP	HY5; transcription factor HY5; K16241 transcription factor HY5	sp|O24646|HY5_ARATH Transcription factor HY5 OS=Arabidopsis thaliana GN=HY5 PE=1 SV=1//4.73053e-65
	BnaCnng01910D	0.423994	0.507117	2.23025	1.97252	UP	FALSE	FALSE	UP	GBF2; basic leucine zipper transcription factor; K09060 plant G-box-binding factor	sp|P42775|GBF2_ARATH G-box-binding factor 2 OS=Arabidopsis thaliana GN=GBF2 PE=1 SV=1//3.26713e-123
	BnaCnng27030D	11.4435	12.2102	29.5871	30.2274	UP	FALSE	FALSE	UP	basic leucine zipper transcription factor; K14432 ABA responsive element binding factor	sp|P42777|GBF4_ARATH G-box-binding factor 4 OS=Arabidopsis thaliana GN=GBF4 PE=1 SV=1//1.42707e-41
	BnaCnng29250D	7.07531	7.27574	60.9067	57.0497	UP	FALSE	FALSE	UP	BZIP25; basic leucine zipper 25	sp|Q9M1G6|BZP25_ARATH Basic leucine zipper 25 OS=Arabidopsis thaliana GN=BZIP25 PE=1 SV=1//5.43516e-117
	BnaCnng36700D	12.1028	11.5099	0.126405	0.311148	DOWN	FALSE	FALSE	DOWN	BZIP24; basic leucine zipper 24	-//-
	BnaCnng41320D	1.63098	1.91412	3.35247	3.05449	UP	FALSE	FALSE	UP	ABF4; ABRE binding factor 4; K14432 ABA responsive element binding factor	sp|Q9M7Q2|AI5L7_ARATH ABSCISIC ACID-INSENSITIVE 5-like protein 7 OS=Arabidopsis thaliana GN=ABF4 PE=1 SV=1//2.15229e-150
C2C2-CO-like(15)	BnaA02g02840D	0.218809	0.240463	3.10424	2.82716	UP	FALSE	FALSE	UP	COL1; zinc finger protein CONSTANS-LIKE 1	sp|O50055|COL1_ARATH Zinc finger protein CONSTANS-LIKE 1 OS=Arabidopsis thaliana GN=COL1 PE=1 SV=1//7.5118e-108
	BnaA02g35200D	11.9668	13.1015	35.2871	57.1621	UP	UP	FALSE	UP	COL5; zinc finger protein CONSTANS-LIKE 5	sp|Q9FHH8|COL5_ARATH Zinc finger protein CONSTANS-LIKE 5 OS=Arabidopsis thaliana GN=COL5 PE=2 SV=2//0
	BnaA05g00150D	1.29322	1.69245	39.1009	33.8013	UP	FALSE	FALSE	UP	zinc finger protein CONSTANS-LIKE 13	sp|O82256|COL13_ARATH Zinc finger protein CONSTANS-LIKE 13 OS=Arabidopsis thaliana GN=COL13 PE=2 SV=1//2.48642e-117
	BnaA05g36570D	10.8542	12.9209	0.258572	0.642549	DOWN	FALSE	FALSE	DOWN	zinc finger protein CONSTANS-LIKE 8	sp|Q9M9B3|COL8_ARATH Zinc finger protein CONSTANS-LIKE 8 OS=Arabidopsis thaliana GN=COL8 PE=2 SV=2//7.27299e-148
	BnaA06g27360D	137.556	134.116	476.816	369.465	UP	DOWN	FALSE	UP	COL4; zinc finger protein CONSTANS-LIKE 4	sp|Q940T9|COL4_ARATH Zinc finger protein CONSTANS-LIKE 4 OS=Arabidopsis thaliana GN=COL4 PE=2 SV=2//1.26904e-161
	BnaA09g04740D	37.473	36.7519	161.389	143.129	UP	FALSE	FALSE	UP	COL4; zinc finger protein CONSTANS-LIKE 4	sp|Q940T9|COL4_ARATH Zinc finger protein CONSTANS-LIKE 4 OS=Arabidopsis thaliana GN=COL4 PE=2 SV=2//1.4771e-168
	BnaA10g18420D	3.24179	3.31109	5.74416	9.95089	UP	UP	FALSE	UP	COL1; zinc finger protein CONSTANS-LIKE 1	sp|O50055|COL1_ARATH Zinc finger protein CONSTANS-LIKE 1 OS=Arabidopsis thaliana GN=COL1 PE=1 SV=1//4.35558e-127
	BnaAnng38870D	2.00585	3.30689	0.654589	2.82296	FALSE	UP	FALSE	FALSE	COL2; zinc finger protein CONSTANS-LIKE 2	sp|Q96502|COL2_ARATH Zinc finger protein CONSTANS-LIKE 2 OS=Arabidopsis thaliana GN=COL2 PE=1 SV=1//3.30782e-142
	BnaC02g11400D	9.86245	10.5925	27.8712	46.9158	UP	UP	FALSE	UP	COL5; zinc finger protein CONSTANS-LIKE 5	sp|Q9FHH8|COL5_ARATH Zinc finger protein CONSTANS-LIKE 5 OS=Arabidopsis thaliana GN=COL5 PE=2 SV=2//2.01729e-122
	BnaC02g38460D	7.92664	6.37921	11.8687	10.6114	UP	FALSE	FALSE	UP	zinc finger protein CONSTANS-LIKE 10	sp|Q9LUA9|COL10_ARATH Zinc finger protein CONSTANS-LIKE 10 OS=Arabidopsis thaliana GN=COL10 PE=1 SV=1//3.75675e-178
	BnaC04g00040D	7.92617	7.77269	558.239	494.383	UP	FALSE	FALSE	UP	zinc finger protein CONSTANS-LIKE 13	sp|O82256|COL13_ARATH Zinc finger protein CONSTANS-LIKE 13 OS=Arabidopsis thaliana GN=COL13 PE=2 SV=1//4.79077e-104
	BnaC07g29680D	99.3014	102.683	251.04	230.785	UP	FALSE	FALSE	UP	COL4; zinc finger protein CONSTANS-LIKE 4	sp|Q940T9|COL4_ARATH Zinc finger protein CONSTANS-LIKE 4 OS=Arabidopsis thaliana GN=COL4 PE=2 SV=2//0
	BnaC09g04200D	64.1329	58.8611	388.57	330.738	UP	FALSE	FALSE	UP	COL4; zinc finger protein CONSTANS-LIKE 4	sp|Q940T9|COL4_ARATH Zinc finger protein CONSTANS-LIKE 4 OS=Arabidopsis thaliana GN=COL4 PE=2 SV=2//0
	BnaC09g32640D	18.7258	21.0816	49.4173	59.5592	UP	FALSE	FALSE	UP	COL5; zinc finger protein CONSTANS-LIKE 5	sp|Q9FHH8|COL5_ARATH Zinc finger protein CONSTANS-LIKE 5 OS=Arabidopsis thaliana GN=COL5 PE=2 SV=2//0
	BnaC09g41980D	1.99445	1.58376	1.4415	2.26458	UP	FALSE	FALSE	FALSE	COL1; zinc finger protein CONSTANS-LIKE 1	sp|O50055|COL1_ARATH Zinc finger protein CONSTANS-LIKE 1 OS=Arabidopsis thaliana GN=COL1 PE=1 SV=1//1.61606e-120
C2C2-Dof(26)	BnaA01g25190D	3.34871	2.71654	14.117	10.4937	UP	FALSE	FALSE	UP	DOF2; Dof zinc finger protein DOF2	sp|Q94AR6|DOF31_ARATH Dof zinc finger protein DOF3.1 OS=Arabidopsis thaliana GN=DOF3.1 PE=2 SV=2//1.79464e-62
	BnaA02g06470D	6.29277	5.47495	1.29769	3.26207	FALSE	UP	FALSE	DOWN	TMO6; Dof-type transcription factor TMO6	sp|Q84TE9|DOF53_ARATH Dof zinc finger protein DOF5.3 OS=Arabidopsis thaliana GN=DOF5.3 PE=2 SV=1//2.20291e-143
	BnaA03g40810D	0.683891	0.797053	0.942228	1.20547	UP	FALSE	FALSE	FALSE	OBP1; Dof zinc finger protein DOF3.4	sp|Q39088|DOF34_ARATH Dof zinc finger protein DOF3.4 OS=Arabidopsis thaliana GN=DOF3.4 PE=1 SV=2//4.2591e-110
	BnaA04g09490D	1.16217	1.33569	26.399	22.497	UP	FALSE	FALSE	UP	CDF2; cycling DOF factor 2	sp|Q93ZL5|CDF2_ARATH Cyclic dof factor 2 OS=Arabidopsis thaliana GN=CDF2 PE=1 SV=2//0
	BnaA04g16440D	2.79236	3.55764	23.7732	29.0911	UP	FALSE	FALSE	UP	Dof zinc finger protein DOF2.1	sp|Q8LE43|DOF21_ARATH Dof zinc finger protein DOF2.1 OS=Arabidopsis thaliana GN=DOF2.1 PE=2 SV=2//1.06013e-72
	BnaA05g15330D	4.35829	4.39978	6.68484	6.59604	UP	FALSE	FALSE	UP	DOF1; DOF zinc finger protein 1	sp|O82155|DOF17_ARATH Dof zinc finger protein DOF1.7 OS=Arabidopsis thaliana GN=DOF1.7 PE=2 SV=1//9.3451e-50
	BnaA05g36740D	1.87638	2.76087	6.31026	4.7669	UP	FALSE	FALSE	UP	DOF2; Dof zinc finger protein DOF2	sp|Q94AR6|DOF31_ARATH Dof zinc finger protein DOF3.1 OS=Arabidopsis thaliana GN=DOF3.1 PE=2 SV=2//2.48851e-57
	BnaA06g24490D	0.817072	0.960242	1.54816	2.33877	UP	FALSE	FALSE	UP	Dof-type zinc finger DNA-binding family protein	sp|Q9LSL6|DOF57_ARATH Dof zinc finger protein DOF5.7 OS=Arabidopsis thaliana GN=DOF5.7 PE=2 SV=1//3.28917e-81
	BnaA07g08490D	3.69666	3.60681	9.84512	10.5235	UP	FALSE	FALSE	UP	Dof zinc finger protein DOF1.4	sp|Q9FZA4|DOF14_ARATH Dof zinc finger protein DOF1.4 OS=Arabidopsis thaliana GN=DOF1.4 PE=2 SV=1//1.83368e-110
	BnaA07g12230D	1.12809	1.0478	2.86709	3.60906	UP	FALSE	FALSE	UP	Dof zinc finger protein DOF5.8	sp|Q9FGD6|DOF58_ARATH Dof zinc finger protein DOF5.8 OS=Arabidopsis thaliana GN=DOF5.8 PE=2 SV=1//2.48244e-88
	BnaA07g14740D	0.608448	0.498218	9.40504	7.27983	UP	FALSE	FALSE	UP	CDF2; cycling DOF factor 2	sp|Q93ZL5|CDF2_ARATH Cyclic dof factor 2 OS=Arabidopsis thaliana GN=CDF2 PE=1 SV=2//4.23326e-177
	BnaA08g01830D	15.4131	9.14749	73.322	129.895	UP	UP	DOWN	UP	DOF1; DOF zinc finger protein 1	sp|O82155|DOF17_ARATH Dof zinc finger protein DOF1.7 OS=Arabidopsis thaliana GN=DOF1.7 PE=2 SV=1//6.41944e-73
	BnaA09g49290D	2.49713	2.19695	8.78899	6.93268	UP	FALSE	FALSE	UP	OBP2; DOF transcription factor OBP2	sp|Q8L9V6|DOF11_ARATH Dof zinc finger protein DOF1.1 OS=Arabidopsis thaliana GN=DOF1.1 PE=1 SV=2//7.7909e-86
	BnaAnng00370D	1.47415	1.15311	2.57037	3.28323	UP	FALSE	FALSE	UP	Dof zinc finger protein DOF5.1	sp|Q9LZ56|DOF51_ARATH Dof zinc finger protein DOF5.1 OS=Arabidopsis thaliana GN=DOF5.1 PE=2 SV=1//8.4475e-142
	BnaAnng22720D	8.26455	8.65664	7.80564	12.8275	UP	UP	FALSE	UP	CDF3; cyclic DOF factor 3	sp|Q8LFV3|CDF3_ARATH Cyclic dof factor 3 OS=Arabidopsis thaliana GN=CDF3 PE=1 SV=2//0
	BnaAnng24480D	0.962729	1.54932	0.0607071	0.142412	DOWN	FALSE	FALSE	DOWN	CDF1; cycling DOF factor 1; K16222 Dof zinc finger protein DOF5.5	sp|Q8W1E3|CDF1_ARATH Cyclic dof factor 1 OS=Arabidopsis thaliana GN=CDF1 PE=1 SV=2//5.20367e-157
	BnaC01g43680D	2.16076	2.38688	13.6603	7.42561	UP	DOWN	FALSE	UP	DOF2; Dof zinc finger protein DOF2	sp|Q94AR6|DOF31_ARATH Dof zinc finger protein DOF3.1 OS=Arabidopsis thaliana GN=DOF3.1 PE=2 SV=2//5.06838e-63
	BnaC03g42040D	9.58533	8.15413	32.6958	26.3048	UP	FALSE	FALSE	UP	DOF2; Dof zinc finger protein DOF2	sp|Q94AR6|DOF31_ARATH Dof zinc finger protein DOF3.1 OS=Arabidopsis thaliana GN=DOF3.1 PE=2 SV=2//1.42367e-72
	BnaC03g77910D	10.5395	7.67682	141.773	181.684	UP	FALSE	FALSE	UP	DOF1; DOF zinc finger protein 1	sp|O82155|DOF17_ARATH Dof zinc finger protein DOF1.7 OS=Arabidopsis thaliana GN=DOF1.7 PE=2 SV=1//5.12143e-67
	BnaC04g31720D	1.05705	1.08051	13.4293	11.5729	UP	FALSE	FALSE	UP	CDF2; cycling DOF factor 2	sp|Q93ZL5|CDF2_ARATH Cyclic dof factor 2 OS=Arabidopsis thaliana GN=CDF2 PE=1 SV=2//0
	BnaC04g39790D	5.61997	6.34334	11.9704	10.3988	UP	FALSE	FALSE	UP	Dof zinc finger protein DOF2.1	sp|Q8LE43|DOF21_ARATH Dof zinc finger protein DOF2.1 OS=Arabidopsis thaliana GN=DOF2.1 PE=2 SV=2//3.6045e-84
	BnaC05g05320D	1.68305	1.79344	3.23064	2.75077	UP	FALSE	FALSE	UP	OBP2; DOF transcription factor OBP2	sp|Q8L9V6|DOF11_ARATH Dof zinc finger protein DOF1.1 OS=Arabidopsis thaliana GN=DOF1.1 PE=1 SV=2//3.18944e-124
	BnaC05g50970D	1.83515	0.99911	2.63812	1.29897	FALSE	DOWN	FALSE	UP	Dof-type zinc finger DNA-binding family protein	sp|Q9LQX4|DOF13_ARATH Dof zinc finger protein DOF1.3 OS=Arabidopsis thaliana GN=DOF1.3 PE=3 SV=1//5.64374e-78
	BnaCnng15140D	9.88456	8.42591	3.8629	8.51461	UP	UP	FALSE	DOWN	CDF3; cyclic DOF factor 3	sp|Q8LFV3|CDF3_ARATH Cyclic dof factor 3 OS=Arabidopsis thaliana GN=CDF3 PE=1 SV=2//0
	BnaCnng38870D	0.220033	0.142148	1.39738	0.549156	UP	DOWN	FALSE	UP	OBP2; DOF transcription factor OBP2	sp|Q8L9V6|DOF11_ARATH Dof zinc finger protein DOF1.1 OS=Arabidopsis thaliana GN=DOF1.1 PE=1 SV=2//7.38099e-87
	BnaCnng70020D	2.23906	2.10158	2.81902	3.48665	UP	FALSE	FALSE	FALSE	Dof-type zinc finger DNA-binding family protein	sp|Q9LSL6|DOF57_ARATH Dof zinc finger protein DOF5.7 OS=Arabidopsis thaliana GN=DOF5.7 PE=2 SV=1//1.10073e-153
C2C2-GATA(21)	BnaA01g01370D	0.788014	2.63063	0.174385	0.441006	DOWN	FALSE	UP	FALSE	GATA7; GATA transcription factor 7	sp|O65515|GATA7_ARATH GATA transcription factor 7 OS=Arabidopsis thaliana GN=GATA7 PE=2 SV=1//1.74752e-96
	BnaA01g14520D	7.17174	6.67608	9.69509	10.1402	UP	FALSE	FALSE	UP	GATA5; GATA transcription factor 5	sp|Q9FH57|GATA5_ARATH GATA transcription factor 5 OS=Arabidopsis thaliana GN=GATA5 PE=2 SV=1//2.0103e-147
	BnaA01g25320D	9.59956	10.5043	14.3442	14.4781	UP	FALSE	FALSE	UP	ZML2; GATA transcription factor 28	sp|Q8GXL7|GAT24_ARATH GATA transcription factor 24 OS=Arabidopsis thaliana GN=GATA24 PE=2 SV=2//5.9414e-157
	BnaA01g32640D	14.6161	14.9177	0.164204	0.599698	DOWN	FALSE	FALSE	DOWN	GATA15; GATA transcription factor 15	sp|Q8LG10|GAT15_ARATH GATA transcription factor 15 OS=Arabidopsis thaliana GN=GATA15 PE=2 SV=2//2.4802e-52
	BnaA05g19840D	9.42313	9.27524	10.7539	12.05	UP	FALSE	FALSE	UP	ZML2; GATA transcription factor 28	sp|Q8GXL7|GAT24_ARATH GATA transcription factor 24 OS=Arabidopsis thaliana GN=GATA24 PE=2 SV=2//5.70907e-158
	BnaA05g23040D	3.16912	3.41323	0.0686762	0.208639	DOWN	FALSE	FALSE	DOWN	GATA17; GATA transcription factor 17	sp|Q9LIB5|GAT17_ARATH GATA transcription factor 17 OS=Arabidopsis thaliana GN=GATA17 PE=2 SV=1//1.1821e-60
	BnaA07g36170D	1.56732	1.39057	1.59651	2.21368	UP	FALSE	FALSE	FALSE	GATA20; GATA transcription factor 20	sp|Q9ZPX0|GAT20_ARATH GATA transcription factor 20 OS=Arabidopsis thaliana GN=GATA20 PE=2 SV=2//1.85278e-84
	BnaA08g01910D	4.33032	4.31545	9.74492	9.23296	UP	FALSE	FALSE	UP	ZML2; GATA transcription factor 28	sp|Q8H1G0|GAT28_ARATH GATA transcription factor 28 OS=Arabidopsis thaliana GN=GATA28 PE=2 SV=1//1.14301e-145
	BnaA08g11030D	0.721779	0.612208	2.8369	2.12986	UP	FALSE	FALSE	UP	GATA3; GATA transcription factor 3	sp|Q8L4M6|GATA3_ARATH GATA transcription factor 3 OS=Arabidopsis thaliana GN=GATA3 PE=2 SV=2//6.93853e-135
	BnaA09g38570D	3.31558	3.24794	0.148917	0.390234	DOWN	FALSE	FALSE	DOWN	GATA4; GATA transcription factor 4	sp|O49743|GATA4_ARATH GATA transcription factor 4 OS=Arabidopsis thaliana GN=GATA4 PE=2 SV=1//1.29633e-106
	BnaC01g03740D	0.745544	0.752726	1.48373	1.3162	UP	FALSE	FALSE	UP	GATA3; GATA transcription factor 3	sp|Q8L4M6|GATA3_ARATH GATA transcription factor 3 OS=Arabidopsis thaliana GN=GATA3 PE=2 SV=2//3.86651e-126
	BnaC02g40000D	3.10971	3.10644	21.9185	18.9213	UP	FALSE	FALSE	UP	GATA23; GATA transcription factor 23	sp|Q8LC59|GAT23_ARATH GATA transcription factor 23 OS=Arabidopsis thaliana GN=GATA23 PE=2 SV=2//1.18213e-25
	BnaC03g77870D	3.64294	3.71458	6.24843	7.46024	UP	FALSE	FALSE	UP	ZML2; GATA transcription factor 28	sp|Q8H1G0|GAT28_ARATH GATA transcription factor 28 OS=Arabidopsis thaliana GN=GATA28 PE=2 SV=1//2.25419e-168
	BnaC05g05680D	3.67973	4.29607	4.82497	5.98822	UP	FALSE	FALSE	UP	GATA11; GATA transcription factor 11	sp|Q6DBP8|GAT11_ARATH GATA transcription factor 11 OS=Arabidopsis thaliana GN=GATA11 PE=2 SV=1//3.07995e-110
	BnaC05g30820D	6.98601	7.6762	11.9889	10.5467	UP	FALSE	FALSE	UP	ZML2; GATA transcription factor 28	sp|Q8GXL7|GAT24_ARATH GATA transcription factor 24 OS=Arabidopsis thaliana GN=GATA24 PE=2 SV=2//3.15351e-165
	BnaC07g03390D	1.28014	0.748773	0.206239	0.678041	FALSE	FALSE	FALSE	DOWN	GATA20; GATA transcription factor 20	sp|Q9ZPX0|GAT20_ARATH GATA transcription factor 20 OS=Arabidopsis thaliana GN=GATA20 PE=2 SV=2//2.22398e-83
	BnaC07g27110D	2.98504	4.51548	4.75781	7.27357	UP	FALSE	FALSE	UP	GATA16; GATA transcription factor 16	sp|Q9FJ10|GAT16_ARATH GATA transcription factor 16 OS=Arabidopsis thaliana GN=GATA16 PE=2 SV=1//3.49157e-54
	BnaC07g32040D	3.34024	3.42466	0.201254	0.453562	DOWN	FALSE	FALSE	DOWN	GATA6; GATA transcription factor 6	sp|Q9SD38|GATA6_ARATH GATA transcription factor 6 OS=Arabidopsis thaliana GN=GATA6 PE=2 SV=1//2.92429e-89
	BnaC07g45180D	2.49876	2.38488	17.2761	10.9199	UP	FALSE	FALSE	UP	GATA3; GATA transcription factor 3	sp|Q8L4M6|GATA3_ARATH GATA transcription factor 3 OS=Arabidopsis thaliana GN=GATA3 PE=2 SV=2//1.21318e-136
	BnaC08g02370D	0.0229474	0.0194905	1.41231	2.27489	UP	FALSE	FALSE	UP	GATA11; GATA transcription factor 11	sp|Q6DBP8|GAT11_ARATH GATA transcription factor 11 OS=Arabidopsis thaliana GN=GATA11 PE=2 SV=1//1.19396e-108
	BnaC09g08090D	2.07824	1.47161	1.61878	2.81526	UP	FALSE	FALSE	FALSE	GATA5; GATA transcription factor 5	sp|Q9FH57|GATA5_ARATH GATA transcription factor 5 OS=Arabidopsis thaliana GN=GATA5 PE=2 SV=1//8.01979e-162
C2H2(52)	BnaA01g07460D	4.04069	6.53425	0.986046	3.78723	FALSE	UP	FALSE	FALSE	hypothetical protein	-//-
	BnaA01g26030D	1.74584	1.07818	6.89802	11.0755	UP	FALSE	FALSE	UP	ZF2; zinc-finger protein 2	sp|Q9SSW2|AZF2_ARATH Zinc finger protein AZF2 OS=Arabidopsis thaliana GN=AZF2 PE=2 SV=1//2.35959e-78
	BnaA02g06780D	1.03413	2.06071	425.7	484.808	UP	FALSE	FALSE	UP	RHL41; high light responsive zinc finger protein ZAT12	sp|Q42410|ZAT12_ARATH Zinc finger protein ZAT12 OS=Arabidopsis thaliana GN=ZAT12 PE=2 SV=1//4.8458e-92
	BnaA02g06790D	0.461411	0.517	108.509	153.938	UP	FALSE	FALSE	UP	RHL41; high light responsive zinc finger protein ZAT12	sp|Q42410|ZAT12_ARATH Zinc finger protein ZAT12 OS=Arabidopsis thaliana GN=ZAT12 PE=2 SV=1//1.15713e-90
	BnaA03g00770D	0.224568	0.64233	0.593567	1.07173	UP	FALSE	FALSE	UP	JKD; zinc finger protein JACKDAW	sp|Q700D2|IDD10_ARATH Zinc finger protein JACKDAW OS=Arabidopsis thaliana GN=JKD PE=1 SV=1//0
	BnaA03g04740D	6.33604	14.0309	3.85449	8.62036	FALSE	UP	UP	FALSE	nucleic acid binding / zinc ion binding protein	sp|Q7ZZ00|ZN511_DANRE Zinc finger protein 511 OS=Danio rerio GN=znf511 PE=2 SV=1//1.27326e-32
	BnaA03g09250D	3.24047	1.96451	186.78	385.756	UP	UP	FALSE	UP	RHL41; high light responsive zinc finger protein ZAT12	sp|Q42410|ZAT12_ARATH Zinc finger protein ZAT12 OS=Arabidopsis thaliana GN=ZAT12 PE=2 SV=1//1.00919e-91
	BnaA03g33060D	1.89865	2.0653	9.68347	6.76134	UP	DOWN	FALSE	UP	IDD11; protein indeterminate(ID)-domain 11	sp|Q9LRW7|IDD11_ARATH Protein indeterminate-domain 11 OS=Arabidopsis thaliana GN=IDD11 PE=2 SV=1//0
	BnaA03g35310D	0.398241	0.227741	36.1733	59.4334	UP	FALSE	FALSE	UP	ZF2; zinc-finger protein 2	sp|Q9SSW2|AZF2_ARATH Zinc finger protein AZF2 OS=Arabidopsis thaliana GN=AZF2 PE=2 SV=1//2.80646e-91
	BnaA04g24110D	0.280065	0.247162	4.04637	4.2238	UP	FALSE	FALSE	UP	zinc finger (C2H2 type, AN1-like) family protein	sp|Q8VZ42|SAP11_ARATH Zinc finger AN1 and C2H2 domain-containing stress-associated protein 11 OS=Arabidopsis thaliana GN=SAP11 PE=2 SV=1//7.37904e-137
	BnaA04g26050D	0.198256	0.0796734	4.78979	4.529	UP	FALSE	FALSE	UP	C2H2-like zinc finger protein	sp|Q9SHD0|ZAT4_ARATH Zinc finger protein ZAT4 OS=Arabidopsis thaliana GN=ZAT4 PE=2 SV=1//3.29397e-84
	BnaA05g20490D	0.494603	0.679746	129.507	149.773	UP	FALSE	FALSE	UP	ZF2; zinc-finger protein 2	sp|Q9SSW2|AZF2_ARATH Zinc finger protein AZF2 OS=Arabidopsis thaliana GN=AZF2 PE=2 SV=1//1.39924e-78
	BnaA06g30880D	0.11911	0.0784137	1.09237	1.0553	UP	FALSE	FALSE	UP	C2H2-type zinc finger protein	sp|A0JNB1|ZN227_BOVIN Zinc finger protein 227 OS=Bos taurus GN=ZNF227 PE=2 SV=1//1.80468e-06
	BnaA06g31730D	0.536718	0.922735	0.163101	1.05825	FALSE	UP	FALSE	FALSE	exonuclease-like protein	sp|Q08237|REXO4_YEAST RNA exonuclease 4 OS=Saccharomyces cerevisiae (strain ATCC 204508 / S288c) GN=REX4 PE=1 SV=1//5.79944e-28
	BnaA06g34330D	4.45949	4.89112	0.0671769	0.381687	DOWN	UP	FALSE	DOWN	IDD4; indeterminate(ID)-domain 4 protein	sp|Q8GYC1|IDD4_ARATH Protein indeterminate-domain 4, chloroplastic OS=Arabidopsis thaliana GN=IDD4 PE=1 SV=1//0
	BnaA08g06410D	7.30158	7.65587	37.5642	36.7004	UP	FALSE	FALSE	UP	STOP1; protein SENSITIVE TO PROTON RHIZOTOXICITY 1	sp|Q9C8N5|STOP1_ARATH Protein SENSITIVE TO PROTON RHIZOTOXICITY 1 OS=Arabidopsis thaliana GN=STOP1 PE=2 SV=1//0
	BnaA08g18790D	1.721	1.43824	308.326	522.126	UP	UP	FALSE	UP	STZ; zinc finger protein STZ/ZAT10	sp|Q96289|ZAT10_ARATH Zinc finger protein ZAT10 OS=Arabidopsis thaliana GN=ZAT10 PE=2 SV=1//1.61614e-98
	BnaA09g07340D	1.6987	0.893809	0.189288	0.672213	FALSE	FALSE	FALSE	DOWN	ZF1; zinc-finger protein 1	sp|Q9SSW1|AZF1_ARATH Zinc finger protein AZF1 OS=Arabidopsis thaliana GN=AZF1 PE=2 SV=1//8.47124e-88
	BnaA09g18960D	4.19148	4.78043	0.0465049	0.31807	DOWN	FALSE	FALSE	DOWN	IDD4; indeterminate(ID)-domain 4 protein	sp|Q8GYC1|IDD4_ARATH Protein indeterminate-domain 4, chloroplastic OS=Arabidopsis thaliana GN=IDD4 PE=1 SV=1//5.54116e-88
	BnaA09g27780D	1.08774	1.08701	101.363	104.529	UP	FALSE	FALSE	UP	STZ; zinc finger protein STZ/ZAT10	sp|Q96289|ZAT10_ARATH Zinc finger protein ZAT10 OS=Arabidopsis thaliana GN=ZAT10 PE=2 SV=1//3.36032e-108
	BnaA09g31310D	8.79923	7.27411	18.7155	17.8751	UP	FALSE	FALSE	UP	IDD2; indeterminate-domain 2 protein	sp|Q9SCQ6|IDD2_ARATH Protein indeterminate-domain 2 OS=Arabidopsis thaliana GN=IDD2 PE=2 SV=1//0
	BnaA09g52630D	1.63891	2.02824	4.05032	6.13295	UP	FALSE	FALSE	UP	C2H2-like zinc finger protein	sp|Q9LVQ7|IDD1_ARATH Protein indeterminate-domain 1 OS=Arabidopsis thaliana GN=IDD1 PE=1 SV=1//0
	BnaA10g12780D	0.80031	1.78535	14.2782	28.8822	UP	UP	FALSE	UP	RHL41; high light responsive zinc finger protein ZAT12	sp|Q42410|ZAT12_ARATH Zinc finger protein ZAT12 OS=Arabidopsis thaliana GN=ZAT12 PE=2 SV=1//5.39627e-92
	BnaA10g22400D	7.25106	7.56231	9.74169	9.79011	UP	FALSE	FALSE	UP	HAM1; MYST family histone acetyltransferase 1; K11308 histone acetyltransferase MYST1 [EC:2.3.1.48]	sp|Q9LXD7|MYST2_ARATH Histone acetyltransferase of the MYST family 2 OS=Arabidopsis thaliana GN=HAM2 PE=1 SV=1//0
	BnaA10g25850D	0.17979	0.170403	10.1671	23.7686	UP	UP	FALSE	UP	ZAT6; zinc finger protein ZAT6	sp|O22533|ZAT6_ARATH Zinc finger protein ZAT6 OS=Arabidopsis thaliana GN=ZAT6 PE=2 SV=1//6.67221e-84
	BnaA10g26360D	16.9082	16.6283	19.9506	28.5503	UP	FALSE	FALSE	UP	HD2C; histone deacetylase 2C	sp|Q9LZR5|HDT3_ARATH Histone deacetylase HDT3 OS=Arabidopsis thaliana GN=HDT3 PE=1 SV=2//3.76796e-17
	BnaC01g33270D	0.365243	0.275309	8.24564	12.3219	UP	FALSE	FALSE	UP	ZF2; zinc-finger protein 2	sp|Q9SSW2|AZF2_ARATH Zinc finger protein AZF2 OS=Arabidopsis thaliana GN=AZF2 PE=2 SV=1//5.91048e-82
	BnaC03g11570D	2.37427	2.7055	698.391	1006.23	UP	FALSE	FALSE	UP	RHL41; high light responsive zinc finger protein ZAT12	sp|Q42410|ZAT12_ARATH Zinc finger protein ZAT12 OS=Arabidopsis thaliana GN=ZAT12 PE=2 SV=1//7.55177e-93
	BnaC03g58080D	1.86165	1.09107	131.722	293.606	UP	UP	FALSE	UP	STZ; zinc finger protein STZ/ZAT10	sp|Q96289|ZAT10_ARATH Zinc finger protein ZAT10 OS=Arabidopsis thaliana GN=ZAT10 PE=2 SV=1//2.31613e-100
	BnaC03g73930D	0.968224	0.684144	37.2981	69.645	UP	UP	FALSE	UP	ZF2; zinc-finger protein 2	sp|Q9SSW2|AZF2_ARATH Zinc finger protein AZF2 OS=Arabidopsis thaliana GN=AZF2 PE=2 SV=1//4.60684e-95
	BnaC04g07880D	0.0365129	0.031842	10.024	33.698	UP	UP	FALSE	UP	zinc finger protein ZAT11	sp|Q9SLD4|ZAT11_ARATH Zinc finger protein ZAT11 OS=Arabidopsis thaliana GN=ZAT11 PE=2 SV=1//1.1913e-100
	BnaC04g16100D	2.19272	1.88145	0.0217992	0.0485634	DOWN	FALSE	FALSE	DOWN	zinc finger protein ZAT5	sp|Q681X4|ZAT5_ARATH Zinc finger protein ZAT5 OS=Arabidopsis thaliana GN=ZAT5 PE=2 SV=1//7.96115e-101
	BnaC04g47860D	2.02374	2.03022	20.165	22.5301	UP	FALSE	FALSE	UP	zinc finger (C2H2 type, AN1-like) family protein	sp|Q8VZ42|SAP11_ARATH Zinc finger AN1 and C2H2 domain-containing stress-associated protein 11 OS=Arabidopsis thaliana GN=SAP11 PE=2 SV=1//2.85944e-133
	BnaC05g20810D	1.1774	0.930413	0.151816	0.343276	FALSE	FALSE	FALSE	DOWN	IDD16; shoot gravitropism5-like protein	sp|Q9FRH4|IDD16_ARATH Protein indeterminate-domain 16 OS=Arabidopsis thaliana GN=IDD16 PE=2 SV=1//5.23225e-159
	BnaC05g21480D	1.77583	2.10883	242.252	300.623	UP	FALSE	FALSE	UP	STZ; zinc finger protein STZ/ZAT10	sp|Q96289|ZAT10_ARATH Zinc finger protein ZAT10 OS=Arabidopsis thaliana GN=ZAT10 PE=2 SV=1//4.64506e-107
	BnaC05g33170D	0.968159	0.689268	68.087	79.5868	UP	FALSE	FALSE	UP	ZF2; zinc-finger protein 2	sp|Q9SSW2|AZF2_ARATH Zinc finger protein AZF2 OS=Arabidopsis thaliana GN=AZF2 PE=2 SV=1//8.13692e-68
	BnaC05g34640D	6.935	6.30879	14.7017	15.8244	UP	FALSE	FALSE	UP	IDD2; indeterminate-domain 2 protein	sp|Q9SCQ6|IDD2_ARATH Protein indeterminate-domain 2 OS=Arabidopsis thaliana GN=IDD2 PE=2 SV=1//0
	BnaC06g01230D	4.38059	7.49376	0.405029	1.13348	DOWN	UP	UP	DOWN	C2H2-like zinc finger protein	-//-
	BnaC06g08250D	9.84292	10.4263	12.2092	13.3312	UP	FALSE	FALSE	UP	STOP1; protein SENSITIVE TO PROTON RHIZOTOXICITY 1	sp|Q9C8N5|STOP1_ARATH Protein SENSITIVE TO PROTON RHIZOTOXICITY 1 OS=Arabidopsis thaliana GN=STOP1 PE=2 SV=1//0
	BnaC07g16940D	0.32893	0.416136	6.256	8.63867	UP	FALSE	FALSE	UP	ZF3; zinc-finger protein 3	sp|Q9SSW0|AZF3_ARATH Zinc finger protein AZF3 OS=Arabidopsis thaliana GN=AZF3 PE=1 SV=1//1.7229e-65
	BnaC07g24840D	1.59837	1.73974	0.0490844	0.234368	DOWN	FALSE	FALSE	DOWN	exonuclease-like protein	sp|Q08237|REXO4_YEAST RNA exonuclease 4 OS=Saccharomyces cerevisiae (strain ATCC 204508 / S288c) GN=REX4 PE=1 SV=1//3.83329e-27
	BnaC07g33900D	1.40992	1.63339	0.0277641	0.091623	DOWN	FALSE	FALSE	DOWN	C2H2-like zinc finger protein	sp|Q9M202|ZAT9_ARATH Zinc finger protein ZAT9 OS=Arabidopsis thaliana GN=ZAT9 PE=2 SV=1//2.30248e-13
	BnaC08g06930D	9.65376	9.32866	58.5955	55.5966	UP	FALSE	FALSE	UP	STOP1; protein SENSITIVE TO PROTON RHIZOTOXICITY 1	sp|Q9C8N5|STOP1_ARATH Protein SENSITIVE TO PROTON RHIZOTOXICITY 1 OS=Arabidopsis thaliana GN=STOP1 PE=2 SV=1//0
	BnaC08g14290D	1.26648	1.34054	2.80426	2.7318	UP	FALSE	FALSE	UP	ZFP5; zinc finger protein 5	sp|Q39264|ZFP5_ARATH Zinc finger protein 5 OS=Arabidopsis thaliana GN=ZFP5 PE=2 SV=1//2.75707e-88
	BnaC08g33940D	0.562058	0.921663	52.078	68.7157	UP	FALSE	FALSE	UP	FZF; zinc finger domain protein REI1-LIKE 2; K14816 pre-60S factor REI1	sp|Q91VY9|ZN622_MOUSE Zinc finger protein 622 OS=Mus musculus GN=Znf622 PE=2 SV=1//2.11811e-09
	BnaC09g07830D	1.70429	1.71869	24.3566	26.9306	UP	FALSE	FALSE	UP	C2H2-like zinc finger protein	sp|Q9LVQ7|IDD1_ARATH Protein indeterminate-domain 1 OS=Arabidopsis thaliana GN=IDD1 PE=1 SV=1//1.99622e-167
	BnaC09g35160D	2.63581	2.74563	34.5103	54.4915	UP	UP	FALSE	UP	RHL41; high light responsive zinc finger protein ZAT12	sp|Q42410|ZAT12_ARATH Zinc finger protein ZAT12 OS=Arabidopsis thaliana GN=ZAT12 PE=2 SV=1//9.65265e-89
	BnaC09g46960D	5.29858	5.18698	9.59016	8.93589	UP	FALSE	FALSE	UP	HAM1; MYST family histone acetyltransferase 1; K11308 histone acetyltransferase MYST1 [EC:2.3.1.48]	sp|Q9LXD7|MYST2_ARATH Histone acetyltransferase of the MYST family 2 OS=Arabidopsis thaliana GN=HAM2 PE=1 SV=1//0
	BnaCnng02600D	7.2195	6.43869	11.6898	12.0409	UP	FALSE	FALSE	UP	HD2C; histone deacetylase 2C	sp|Q9LZR5|HDT3_ARATH Histone deacetylase HDT3 OS=Arabidopsis thaliana GN=HDT3 PE=1 SV=2//5.36128e-19
	BnaCnng20570D	0.0236312	0.100306	4.3089	12.9304	UP	UP	FALSE	UP	ZAT6; zinc finger protein ZAT6	sp|O22533|ZAT6_ARATH Zinc finger protein ZAT6 OS=Arabidopsis thaliana GN=ZAT6 PE=2 SV=1//2.68765e-80
	BnaCnng66450D	2.08819	2.14472	0.068239	0.145639	DOWN	FALSE	FALSE	DOWN	zinc finger protein ZAT5	sp|Q681X4|ZAT5_ARATH Zinc finger protein ZAT5 OS=Arabidopsis thaliana GN=ZAT5 PE=2 SV=1//1.99734e-91
	BnaCnng66930D	3.74641	3.84118	25.2553	22.536	UP	FALSE	FALSE	UP	IDD7; indeterminate(ID)-domain 7 protein	sp|Q8H1F5|IDD7_ARATH Protein indeterminate-domain 7 OS=Arabidopsis thaliana GN=IDD7 PE=2 SV=1//9.01135e-98
C3H(57)	BnaA01g14740D	2.48243	1.98698	3.6409	3.66484	UP	FALSE	FALSE	UP	ZFWD1; zinc finger WD40 repeat protein 1	sp|Q9FNZ2|C3H48_ARATH Zinc finger CCCH domain-containing protein 48 OS=Arabidopsis thaliana GN=ZFWD1 PE=2 SV=1//0
	BnaA01g36550D	1.60328	1.6066	3.3062	3.59889	UP	FALSE	FALSE	UP	zinc finger CCCH domain-containing protein 40	sp|Q93XW7|C3H40_ARATH Zinc finger CCCH domain-containing protein 40 OS=Arabidopsis thaliana GN=At3g21810 PE=1 SV=1//9.08746e-164
	BnaA02g01280D	3.41765	3.0878	6.05443	4.40314	UP	DOWN	FALSE	UP	zinc finger CCCH domain-containing protein 56	sp|Q9LXV4|C3H56_ARATH Zinc finger CCCH domain-containing protein 56 OS=Arabidopsis thaliana GN=At5g12850 PE=2 SV=1//0
	BnaA02g08450D	0.437534	0.601292	1.23413	1.22679	UP	FALSE	FALSE	UP	emb1789; protein EMBRYO DEFECTIVE 1789	sp|Q9LTS7|C3H65_ARATH Zinc finger CCCH domain-containing protein 65 OS=Arabidopsis thaliana GN=EMB1789 PE=2 SV=1//0
	BnaA02g29020D	2.57543	2.27844	4.64718	3.4273	UP	DOWN	FALSE	UP	zinc finger CCCH domain-containing protein; K13192 RNA-binding protein 26	sp|Q9LVX1|C3H41_ARATH Zinc finger CCCH domain-containing protein 41 OS=Arabidopsis thaliana GN=At3g27700 PE=1 SV=1//0
	BnaA03g18900D	0.0756981	0.0904221	15.634	14.034	UP	FALSE	FALSE	UP	CZF1; zinc finger CCCH domain-containing protein 29	sp|Q9XEE6|C3H29_ARATH Zinc finger CCCH domain-containing protein 29 OS=Arabidopsis thaliana GN=At2g40140 PE=2 SV=1//0
	BnaA03g30350D	7.61538	6.94158	8.3383	9.40429	UP	FALSE	FALSE	UP	zinc finger (CCCH-type/C3HC4-type RING finger) family protein; K15687 E3 ubiquitin-protein ligase makorin [EC:6.3.2.19]	sp|Q6IDS6|C3H35_ARATH E3 ubiquitin-protein ligase makorin OS=Arabidopsis thaliana GN=MKRN PE=2 SV=1//3.62225e-171
	BnaA04g10220D	2.38347	2.43242	4.93981	5.73608	UP	FALSE	FALSE	UP	zinc finger CCCH domain-containing protein 59	sp|Q9FKR9|C3H59_ARATH Zinc finger CCCH domain-containing protein 59 OS=Arabidopsis thaliana GN=ZFWD3 PE=2 SV=1//0
	BnaA05g09820D	3.04233	3.28265	5.23058	4.21235	UP	FALSE	FALSE	UP	FES1; zinc finger domain protein FES1	sp|Q84VG7|FES1_ARATH Protein FRIGIDA-ESSENTIAL 1 OS=Arabidopsis thaliana GN=FES1 PE=1 SV=2//0
	BnaA05g26510D	13.9199	15.0793	20.1595	20.7132	UP	FALSE	FALSE	UP	HUA1; floral homeotic protein HUA1	sp|Q941Q3|C3H37_ARATH Zinc finger CCCH domain-containing protein 37 OS=Arabidopsis thaliana GN=HUA1 PE=1 SV=1//6.04347e-16
	BnaA05g26890D	3.90774	3.84046	5.10567	6.01302	UP	FALSE	FALSE	UP	KH and zinc finger CCCH domain-containing protein	sp|Q9C7C3|C3H36_ARATH Zinc finger CCCH domain-containing protein 36 OS=Arabidopsis thaliana GN=At3g12130 PE=2 SV=1//1.75871e-118
	BnaA05g28580D	4.53529	3.30061	60.2159	61.9983	UP	FALSE	FALSE	UP	SZF1; salt-inducible zinc finger 1	sp|Q93ZS9|C3H47_ARATH Zinc finger CCCH domain-containing protein 47 OS=Arabidopsis thaliana GN=At3g55980 PE=2 SV=1//0
	BnaA05g34540D	0.558116	0.5794	32.4045	41.7624	UP	FALSE	FALSE	UP	CZF1; zinc finger CCCH domain-containing protein 29	sp|Q9XEE6|C3H29_ARATH Zinc finger CCCH domain-containing protein 29 OS=Arabidopsis thaliana GN=At2g40140 PE=2 SV=1//0
	BnaA06g22640D	1.74043	1.52781	1.9636	1.95378	UP	FALSE	FALSE	UP	zinc finger CCCH domain-containing protein 67	sp|Q5RJC5|C3H67_ARATH Zinc finger CCCH domain-containing protein 67 OS=Arabidopsis thaliana GN=At5g63260 PE=2 SV=2//0
	BnaA07g00960D	4.52757	5.48148	33.5064	29.4406	UP	FALSE	FALSE	UP	oxidation-related zinc Finger 1	sp|O82199|C3H20_ARATH Zinc finger CCCH domain-containing protein 20 OS=Arabidopsis thaliana GN=At2g19810 PE=2 SV=1//7.2116e-150
	BnaA07g36590D	2.01878	1.51507	10.0038	10.6043	UP	FALSE	FALSE	UP	U2AF35B; Splicing factor U2af small subunit B; K12836 splicing factor U2AF 35 kDa subunit	sp|Q9S709|U2AFA_ARATH Splicing factor U2af small subunit A OS=Arabidopsis thaliana GN=U2AF35A PE=1 SV=1//1.55698e-70
	BnaA08g07960D	3.9444	3.56849	5.05824	5.38865	UP	FALSE	FALSE	UP	zinc finger (CCCH-type/C3HC4-type RING finger) family protein; K15687 E3 ubiquitin-protein ligase makorin [EC:6.3.2.19]	sp|Q6IDS6|C3H35_ARATH E3 ubiquitin-protein ligase makorin OS=Arabidopsis thaliana GN=MKRN PE=2 SV=1//6.73687e-127
	BnaA08g18840D	14.8485	13.7232	21.5992	18.7001	UP	FALSE	FALSE	UP	U2AF35B; Splicing factor U2af small subunit B; K12836 splicing factor U2AF 35 kDa subunit	sp|Q9S709|U2AFA_ARATH Splicing factor U2af small subunit A OS=Arabidopsis thaliana GN=U2AF35A PE=1 SV=1//3.04848e-102
	BnaA08g20910D	1.8835	2.15789	5.27302	4.57188	UP	FALSE	FALSE	UP	zinc finger (CCCH-type/C3HC4-type RING finger) family protein; K15687 E3 ubiquitin-protein ligase makorin [EC:6.3.2.19]	sp|E0X9N4|C3H69_ARATH Zinc finger CCCH domain-containing protein 69 OS=Arabidopsis thaliana GN=At3g63550 PE=3 SV=1//8.42407e-155
	BnaA08g27570D	0.263444	0.361479	75.0368	61.786	UP	FALSE	FALSE	UP	SOM; CCCH-type zinc finger protein SOMNUS	sp|Q9ZWA1|C3H2_ARATH Zinc finger CCCH domain-containing protein 2 OS=Arabidopsis thaliana GN=At1g03790 PE=2 SV=1//8.66156e-149
	BnaA08g28930D	13.03	13.6963	20.3288	21.6222	UP	FALSE	FALSE	UP	MOS4-associated complex subunit 5A; K12872 pre-mRNA-splicing factor RBM22/SLT11	sp|Q9LNV5|C3H4_ARATH Zinc finger CCCH domain-containing protein 4 OS=Arabidopsis thaliana GN=At1g07360 PE=2 SV=1//0
	BnaA09g15730D	22.593	23.7556	33.9696	34.7406	UP	FALSE	FALSE	UP	U2AF35B; Splicing factor U2af small subunit B; K12836 splicing factor U2AF 35 kDa subunit	sp|Q9FMY5|U2AFB_ARATH Splicing factor U2af small subunit B OS=Arabidopsis thaliana GN=U2AF35B PE=1 SV=1//7.63922e-118
	BnaA09g17030D	0.64214	0.916476	6.9844	5.68478	UP	FALSE	FALSE	UP	zinc finger CCCH domain-containing protein 61	sp|Q9FKW2|C3H61_ARATH Zinc finger CCCH domain-containing protein 61 OS=Arabidopsis thaliana GN=At5g44260 PE=2 SV=1//3.68172e-167
	BnaA10g00560D	5.77758	6.28082	19.3368	17.7484	UP	FALSE	FALSE	UP	zinc finger CCCH domain-containing protein 1; K13127 RING finger protein 113A	sp|Q8GX84|C3H1_ARATH Zinc finger CCCH domain-containing protein 1 OS=Arabidopsis thaliana GN=At1g01350 PE=2 SV=2//0
	BnaA10g02150D	0.401416	0.438277	132.116	121.756	UP	FALSE	FALSE	UP	SOM; CCCH-type zinc finger protein SOMNUS	sp|Q9ZWA1|C3H2_ARATH Zinc finger CCCH domain-containing protein 2 OS=Arabidopsis thaliana GN=At1g03790 PE=2 SV=1//6.61179e-154
	BnaA10g25900D	12.2285	13.6708	58.9109	56.8439	UP	FALSE	FALSE	UP	CCCH-type zinc fingerfamily protein with RNA-binding domain; K12872 pre-mRNA-splicing factor RBM22/SLT11	sp|Q9ZW36|C3H25_ARATH Zinc finger CCCH domain-containing protein 25 OS=Arabidopsis thaliana GN=At2g29580 PE=2 SV=1//2.53036e-30
	BnaA10g29460D	0.96927	0.854878	3.48369	2.46857	UP	FALSE	FALSE	UP	zinc finger CCCH domain-containing protein 66	sp|Q9LUZ4|C3H66_ARATH Zinc finger CCCH domain-containing protein 66 OS=Arabidopsis thaliana GN=At5g58620 PE=2 SV=1//0
	BnaAnng12470D	1.97492	2.29365	9.15467	8.98183	UP	FALSE	FALSE	UP	zinc finger CCCH domain-containing protein 3	sp|Q94AD9|C3H3_ARATH Zinc finger CCCH domain-containing protein 3 OS=Arabidopsis thaliana GN=At1g04990 PE=2 SV=1//0
	BnaC01g39490D	1.65921	0.951313	6.57626	6.52751	UP	FALSE	FALSE	UP	zinc finger (CCCH-type/C3HC4-type RING finger) family protein; K15687 E3 ubiquitin-protein ligase makorin [EC:6.3.2.19]	sp|Q6IDS6|C3H35_ARATH E3 ubiquitin-protein ligase makorin OS=Arabidopsis thaliana GN=MKRN PE=2 SV=1//2.04603e-166
	BnaC02g12000D	1.00952	1.10236	1.89268	1.92756	UP	FALSE	FALSE	UP	emb1789; protein EMBRYO DEFECTIVE 1789	sp|Q9LTS7|C3H65_ARATH Zinc finger CCCH domain-containing protein 65 OS=Arabidopsis thaliana GN=EMB1789 PE=2 SV=1//0
	BnaC02g28790D	9.63283	11.0795	20.6226	20.0153	UP	FALSE	FALSE	UP	U2AF35B; Splicing factor U2af small subunit B; K12836 splicing factor U2AF 35 kDa subunit	sp|Q9FMY5|U2AFB_ARATH Splicing factor U2af small subunit B OS=Arabidopsis thaliana GN=U2AF35B PE=1 SV=1//8.77274e-42
	BnaC02g28800D	7.69683	9.4284	28.9623	17.2652	UP	DOWN	FALSE	UP	U2AF35B; Splicing factor U2af small subunit B; K12836 splicing factor U2AF 35 kDa subunit	sp|Q9FMY5|U2AFB_ARATH Splicing factor U2af small subunit B OS=Arabidopsis thaliana GN=U2AF35B PE=1 SV=1//4.51592e-18
	BnaC02g34370D	10.8757	11.2088	14.8542	14.5248	UP	FALSE	FALSE	UP	zinc finger CCCH domain-containing protein 17	sp|Q9ZUM0|C3H17_ARATH Zinc finger CCCH domain-containing protein 17 OS=Arabidopsis thaliana GN=At2g02160 PE=1 SV=1//0
	BnaC03g22460D	0.158836	0.149706	43.0593	43.2272	UP	FALSE	FALSE	UP	CZF1; zinc finger CCCH domain-containing protein 29	sp|Q9XEE6|C3H29_ARATH Zinc finger CCCH domain-containing protein 29 OS=Arabidopsis thaliana GN=At2g40140 PE=2 SV=1//0
	BnaC03g34690D	3.19161	3.44727	0.281636	0.621496	DOWN	FALSE	FALSE	DOWN	zinc finger CCCH domain-containing protein 34	sp|Q9SQU4|C3H34_ARATH Zinc finger CCCH domain-containing protein 34 OS=Arabidopsis thaliana GN=At3g06410 PE=2 SV=2//7.82719e-179
	BnaC04g00190D	1.09236	1.24814	2.2458	2.10723	UP	FALSE	FALSE	UP	zinc finger CCCH domain-containing protein 31	sp|O22243|C3H31_ARATH Zinc finger CCCH domain-containing protein 31 OS=Arabidopsis thaliana GN=At2g47680 PE=2 SV=2//0
	BnaC04g11770D	2.11758	1.94135	3.4839	2.97465	UP	FALSE	FALSE	UP	ZFN2; zinc finger nuclease 2	sp|O48772|C3H26_ARATH Zinc finger CCCH domain-containing protein 26 OS=Arabidopsis thaliana GN=ZFN2 PE=1 SV=1//8.9215e-178
	BnaC04g32390D	1.61631	2.06831	2.60657	3.13183	UP	FALSE	FALSE	UP	zinc finger CCCH domain-containing protein 59	sp|Q9FKR9|C3H59_ARATH Zinc finger CCCH domain-containing protein 59 OS=Arabidopsis thaliana GN=ZFWD3 PE=2 SV=1//0
	BnaC04g32400D	1.56367	1.48979	2.3997	2.49483	UP	FALSE	FALSE	UP	zinc finger CCCH domain-containing protein 59	sp|Q9FKR9|C3H59_ARATH Zinc finger CCCH domain-containing protein 59 OS=Arabidopsis thaliana GN=ZFWD3 PE=2 SV=1//1.65049e-96
	BnaC04g40630D	2.72187	2.86982	7.42763	7.36355	UP	FALSE	FALSE	UP	MOS4-associated complex subunit MAC5B; K12872 pre-mRNA-splicing factor RBM22/SLT11	sp|Q9ZW36|C3H25_ARATH Zinc finger CCCH domain-containing protein 25 OS=Arabidopsis thaliana GN=At2g29580 PE=2 SV=1//0
	BnaC05g00630D	3.51643	3.92481	6.34335	5.79893	UP	FALSE	FALSE	UP	zinc finger CCCH domain-containing protein 1; K13127 RING finger protein 113A	sp|Q8GX84|C3H1_ARATH Zinc finger CCCH domain-containing protein 1 OS=Arabidopsis thaliana GN=At1g01350 PE=2 SV=2//0
	BnaC05g02070D	0.046684	0.111556	23.2016	20.1768	UP	FALSE	FALSE	UP	SOM; CCCH-type zinc finger protein SOMNUS	sp|Q9ZWA1|C3H2_ARATH Zinc finger CCCH domain-containing protein 2 OS=Arabidopsis thaliana GN=At1g03790 PE=2 SV=1//1.82251e-151
	BnaC05g03020D	0.79429	0.836139	6.18236	6.39345	UP	FALSE	FALSE	UP	zinc finger CCCH domain-containing protein 3	sp|Q94AD9|C3H3_ARATH Zinc finger CCCH domain-containing protein 3 OS=Arabidopsis thaliana GN=At1g04990 PE=2 SV=1//0
	BnaC05g16890D	2.99714	2.91115	9.12207	6.73547	UP	FALSE	FALSE	UP	zinc finger CCCH domain-containing protein	sp|P0C945|Y1158_ARATH Uncharacterized protein At1g21580 OS=Arabidopsis thaliana GN=At1g21580 PE=1 SV=1//0
	BnaC05g40550D	15.9703	16.4771	27.3647	24.2746	UP	FALSE	FALSE	UP	HUA1; floral homeotic protein HUA1	sp|Q941Q3|C3H37_ARATH Zinc finger CCCH domain-containing protein 37 OS=Arabidopsis thaliana GN=HUA1 PE=1 SV=1//5.92899e-16
	BnaC06g27780D	1.45098	0.870067	2.03257	1.74802	UP	FALSE	FALSE	UP	zinc finger CCCH domain-containing protein	sp|Q9C9N3|C3H14_ARATH Zinc finger CCCH domain-containing protein 14 OS=Arabidopsis thaliana GN=At1g66810 PE=2 SV=1//2.57541e-128
	BnaC07g01380D	5.11072	5.59742	50.1582	33.9178	UP	DOWN	FALSE	UP	oxidation-related zinc Finger 1	sp|O82199|C3H20_ARATH Zinc finger CCCH domain-containing protein 20 OS=Arabidopsis thaliana GN=At2g19810 PE=2 SV=1//0
	BnaC07g11590D	7.34996	7.15068	16.4813	14.8491	UP	FALSE	FALSE	UP	U2AF35B; Splicing factor U2af small subunit B; K12836 splicing factor U2AF 35 kDa subunit	sp|Q9S709|U2AFA_ARATH Splicing factor U2af small subunit A OS=Arabidopsis thaliana GN=U2AF35A PE=1 SV=1//2.89383e-72
	BnaC08g02120D	6.74939	7.8744	9.32966	10.2838	UP	FALSE	FALSE	UP	MOS4-associated complex subunit 5A; K12872 pre-mRNA-splicing factor RBM22/SLT11	sp|Q9LNV5|C3H4_ARATH Zinc finger CCCH domain-containing protein 4 OS=Arabidopsis thaliana GN=At1g07360 PE=2 SV=1//0
	BnaC08g09210D	10.5784	9.70097	16.3131	13.3446	UP	FALSE	FALSE	UP	zinc finger (CCCH-type/C3HC4-type RING finger) family protein; K15687 E3 ubiquitin-protein ligase makorin [EC:6.3.2.19]	sp|E0X9N4|C3H69_ARATH Zinc finger CCCH domain-containing protein 69 OS=Arabidopsis thaliana GN=At3g63550 PE=3 SV=1//1.04041e-147
	BnaC08g19850D	0.309424	0.357233	1.06041	1.07337	UP	FALSE	FALSE	UP	zinc finger CCCH domain-containing protein	sp|P0C945|Y1158_ARATH Uncharacterized protein At1g21580 OS=Arabidopsis thaliana GN=At1g21580 PE=1 SV=1//2.95906e-79
	BnaC08g26910D	6.98762	4.59748	102.33	109.289	UP	FALSE	FALSE	UP	SZF1; salt-inducible zinc finger 1	sp|Q93ZS9|C3H47_ARATH Zinc finger CCCH domain-containing protein 47 OS=Arabidopsis thaliana GN=At3g55980 PE=2 SV=1//0
	BnaC09g17190D	15.5093	16.5865	34.8295	33.0803	UP	FALSE	FALSE	UP	U2AF35B; Splicing factor U2af small subunit B; K12836 splicing factor U2AF 35 kDa subunit	sp|Q9FMY5|U2AFB_ARATH Splicing factor U2af small subunit B OS=Arabidopsis thaliana GN=U2AF35B PE=1 SV=1//7.54658e-118
	BnaC09g33420D	3.06809	3.47189	0.233238	0.548151	DOWN	FALSE	FALSE	DOWN	zinc finger CCCH domain-containing protein 64	sp|Q84WU9|C3H64_ARATH Zinc finger CCCH domain-containing protein 64 OS=Arabidopsis thaliana GN=At5g56900 PE=2 SV=1//0
	BnaCnng05170D	3.60977	3.71195	6.17098	5.47022	UP	FALSE	FALSE	UP	FES1; zinc finger domain protein FES1	sp|Q84VG7|FES1_ARATH Protein FRIGIDA-ESSENTIAL 1 OS=Arabidopsis thaliana GN=FES1 PE=1 SV=2//0
	BnaCnng27960D	1.49765	1.6548	13.8286	15.9198	UP	FALSE	FALSE	UP	CZF1; zinc finger CCCH domain-containing protein 29	sp|Q9XEE6|C3H29_ARATH Zinc finger CCCH domain-containing protein 29 OS=Arabidopsis thaliana GN=At2g40140 PE=2 SV=1//0
	BnaCnng43600D	2.21587	1.8383	3.25319	2.89807	UP	FALSE	FALSE	UP	zinc finger CCCH domain-containing protein 40	sp|Q93XW7|C3H40_ARATH Zinc finger CCCH domain-containing protein 40 OS=Arabidopsis thaliana GN=At3g21810 PE=1 SV=1//7.7929e-165
CAMTA(9)	BnaA04g12770D	3.41952	3.36158	11.3131	12.1055	UP	FALSE	FALSE	UP	SR1; calmodulin-binding transcription activator 3	sp|Q8GSA7|CMTA3_ARATH Calmodulin-binding transcription activator 3 OS=Arabidopsis thaliana GN=CMTA3 PE=1 SV=1//0
	BnaA05g22990D	3.50664	3.19326	11.7569	11.7747	UP	FALSE	FALSE	UP	calmodulin-binding transcription activator	sp|Q9LSP8|CMTA6_ARATH Calmodulin-binding transcription activator 6 OS=Arabidopsis thaliana GN=CMTA6 PE=2 SV=1//0
	BnaA07g25100D	3.15477	3.29543	8.75906	8.11089	UP	FALSE	FALSE	UP	calmodulin-binding transcription activator 4	sp|Q9FYG2|CMTA4_ARATH Calmodulin-binding transcription activator 4 OS=Arabidopsis thaliana GN=CMTA4 PE=1 SV=1//0
	BnaA08g06080D	5.66019	5.66651	7.69782	7.48102	UP	FALSE	FALSE	UP	calmodulin-binding transcription activator 5	sp|O23463|CMTA5_ARATH Calmodulin-binding transcription activator 5 OS=Arabidopsis thaliana GN=CMTA5 PE=2 SV=2//0
	BnaC02g45620D	3.00933	3.29636	4.26363	4.74376	UP	FALSE	FALSE	UP	calmodulin-binding transcription activator 4	sp|Q9FYG2|CMTA4_ARATH Calmodulin-binding transcription activator 4 OS=Arabidopsis thaliana GN=CMTA4 PE=1 SV=1//0
	BnaC04g34700D	4.04598	3.80184	29.0841	28.1708	UP	FALSE	FALSE	UP	SR1; calmodulin-binding transcription activator 3	sp|Q8GSA7|CMTA3_ARATH Calmodulin-binding transcription activator 3 OS=Arabidopsis thaliana GN=CMTA3 PE=1 SV=1//0
	BnaC05g36450D	6.02939	6.78694	8.64832	8.92579	UP	FALSE	FALSE	UP	calmodulin-binding transcription activator	sp|Q9LSP8|CMTA6_ARATH Calmodulin-binding transcription activator 6 OS=Arabidopsis thaliana GN=CMTA6 PE=2 SV=1//0
	BnaC09g06280D	5.06475	5.33145	7.62682	6.88294	UP	FALSE	FALSE	UP	calmodulin-binding transcription activator 2	sp|Q6NPP4|CMTA2_ARATH Calmodulin-binding transcription activator 2 OS=Arabidopsis thaliana GN=CMTA2 PE=1 SV=1//0
	BnaC09g47120D	8.86791	8.73949	9.91361	11.0962	UP	FALSE	FALSE	UP	EICBP.B; calmodulin-binding transcription activator 1	sp|Q9FY74|CMTA1_ARATH Calmodulin-binding transcription activator 1 OS=Arabidopsis thaliana GN=CMTA1 PE=2 SV=2//0
CCAAT(41)	BnaA01g28350D	7.76602	8.15216	50.48	42.7624	UP	FALSE	FALSE	UP	NF-YB3; nuclear transcription factor Y subunit B-3	sp|O23310|NFYB3_ARATH Nuclear transcription factor Y subunit B-3 OS=Arabidopsis thaliana GN=NFYB3 PE=2 SV=1//1.62163e-78
	BnaA02g01270D	6.85103	6.99711	7.7458	13.9705	UP	UP	FALSE	UP	NF-YA1; nuclear transcription factor Y subunit A-1; K08064 nuclear transcription factor Y, alpha	sp|Q9LXV5|NFYA1_ARATH Nuclear transcription factor Y subunit A-1 OS=Arabidopsis thaliana GN=NFYA1 PE=2 SV=1//1.0181e-70
	BnaA02g25600D	33.7138	27.2665	73.6653	74.5417	UP	FALSE	FALSE	UP	NF-YB2; nuclear transcription factor Y subunit B-2	sp|Q9FGJ3|NFYB2_ARATH Nuclear transcription factor Y subunit B-2 OS=Arabidopsis thaliana GN=NFYB2 PE=2 SV=1//4.90448e-81
	BnaA03g16960D	11.0227	13.5495	30.059	32.7486	UP	FALSE	FALSE	UP	NF-YB8; nuclear transcription factor Y subunit B-8	sp|Q8VYK4|NFYB8_ARATH Nuclear transcription factor Y subunit B-8 OS=Arabidopsis thaliana GN=NFYB8 PE=2 SV=1//6.56732e-102
	BnaA03g33970D	74.4928	61.4629	142.585	109.378	UP	DOWN	FALSE	UP	NF-YB3; nuclear transcription factor Y subunit B-3	sp|O23310|NFYB3_ARATH Nuclear transcription factor Y subunit B-3 OS=Arabidopsis thaliana GN=NFYB3 PE=2 SV=1//9.01942e-84
	BnaA05g09110D	13.4827	13.5044	21.0378	18.4462	UP	FALSE	FALSE	UP	NF-YA4; nuclear transcription factor Y subunit A-4; K08064 nuclear transcription factor Y, alpha	sp|Q8VY64|NFYA4_ARATH Nuclear transcription factor Y subunit A-4 OS=Arabidopsis thaliana GN=NFYA4 PE=2 SV=1//2.42852e-107
	BnaA05g26680D	2.72143	2.36267	0.0523999	0.196923	DOWN	FALSE	FALSE	DOWN	NF-YC11; nuclear factor Y, subunit C11	sp|Q14919|NC2A_HUMAN Dr1-associated corepressor OS=Homo sapiens GN=DRAP1 PE=1 SV=3//4.94635e-07
	BnaA06g04450D	2.68841	2.74183	0.456898	1.14705	FALSE	FALSE	FALSE	DOWN	NF-YC10; nuclear factor Y, subunit C10	sp|Q9JKP8|CHRC1_MOUSE Chromatin accessibility complex protein 1 OS=Mus musculus GN=Chrac1 PE=1 SV=1//7.18104e-13
	BnaA06g05170D	64.2885	67.1532	263.489	318.305	UP	FALSE	FALSE	UP	GAMMA-H2AX; gamma histone variant H2AX; K11251 histone H2A	sp|Q9S9K7|H2AXB_ARATH Probable histone H2AXb OS=Arabidopsis thaliana GN=At1g54690 PE=1 SV=1//5.08777e-63
	BnaA06g05230D	3.98351	4.37318	7.47332	11.6408	UP	FALSE	FALSE	UP	NF-YC9; heme activated protein 5c	sp|Q8L4B2|NFYC9_ARATH Nuclear transcription factor Y subunit C-9 OS=Arabidopsis thaliana GN=NFYC9 PE=2 SV=1//1.95893e-86
	BnaA07g17770D	0.0650087	0.181376	12.5027	11.0733	UP	FALSE	FALSE	UP	NF-YC2; nuclear transcription factor Y subunit C-2	sp|Q8LCG7|NFYC2_ARATH Nuclear transcription factor Y subunit C-2 OS=Arabidopsis thaliana GN=NFYC2 PE=2 SV=2//2.9407e-88
	BnaA08g02000D	89.1707	94.9925	110.004	133.982	UP	FALSE	FALSE	UP	HTA10; histone H2A 10; K11251 histone H2A	sp|Q9C681|H2A1_ARATH Probable histone H2A.1 OS=Arabidopsis thaliana GN=At1g51060 PE=1 SV=1//2.35898e-51
	BnaA08g26690D	1.83346	2.55145	0.447356	1.85398	FALSE	UP	FALSE	FALSE	NF-YC9; heme activated protein 5c	sp|Q8L4B2|NFYC9_ARATH Nuclear transcription factor Y subunit C-9 OS=Arabidopsis thaliana GN=NFYC9 PE=2 SV=1//9.20584e-95
	BnaA09g18400D	45.3558	43.7468	103.448	98.4834	UP	FALSE	FALSE	UP	NF-YB2; nuclear transcription factor Y subunit B-2	sp|Q9FGJ3|NFYB2_ARATH Nuclear transcription factor Y subunit B-2 OS=Arabidopsis thaliana GN=NFYB2 PE=2 SV=1//1.62804e-82
	BnaA09g26040D	5.53507	5.10027	33.5132	34.8806	UP	FALSE	FALSE	UP	NF-YA7; nuclear transcription factor Y subunit A-7; K08064 nuclear transcription factor Y, alpha	sp|Q84JP1|NFYA7_ARATH Nuclear transcription factor Y subunit A-7 OS=Arabidopsis thaliana GN=NFYA7 PE=2 SV=1//1.99263e-79
	BnaA09g33640D	6.85193	7.00893	9.03709	10.7299	UP	FALSE	FALSE	UP	NF-YB10; nuclear transcription factor Y subunit B-10	sp|Q67XJ2|NFYBA_ARATH Nuclear transcription factor Y subunit B-10 OS=Arabidopsis thaliana GN=NFYB10 PE=2 SV=1//8.14829e-67
	BnaA09g48620D	27.1048	18.5499	54.4836	49.3675	UP	FALSE	DOWN	UP	NF-YC9; heme activated protein 5c	sp|Q8L4B2|NFYC9_ARATH Nuclear transcription factor Y subunit C-9 OS=Arabidopsis thaliana GN=NFYC9 PE=2 SV=1//3.66531e-91
	BnaA10g08450D	5.93224	6.61818	69.4586	72.9749	UP	FALSE	FALSE	UP	RAT5; histone H2A 1; K11251 histone H2A	sp|Q9LD28|H2A6_ARATH Histone H2A.6 OS=Arabidopsis thaliana GN=RAT5 PE=1 SV=1//3.66076e-56
	BnaA10g23160D	8.57747	10.8815	20.1673	20.0595	UP	FALSE	FALSE	UP	NF-YB12; nuclear factor Y, subunit B12	sp|P49592|NC2B_ARATH Protein Dr1 homolog OS=Arabidopsis thaliana GN=DR1 PE=2 SV=1//2.05267e-68
	BnaA10g23530D	5.20207	5.55599	9.31588	8.39575	UP	FALSE	FALSE	UP	NF-YC11; nuclear factor Y, subunit C11	sp|Q14919|NC2A_HUMAN Dr1-associated corepressor OS=Homo sapiens GN=DRAP1 PE=1 SV=3//5.13394e-28
	BnaA10g29990D	2.25344	2.35607	12.8025	12.641	UP	FALSE	FALSE	UP	NF-YA1; nuclear transcription factor Y subunit A-1; K08064 nuclear transcription factor Y, alpha	sp|Q9LXV5|NFYA1_ARATH Nuclear transcription factor Y subunit A-1 OS=Arabidopsis thaliana GN=NFYA1 PE=2 SV=1//2.48816e-107
	BnaAnng16580D	2.54014	3.25037	5.53855	6.5302	UP	FALSE	FALSE	UP	TAF12; TBP-associated factor 12; K03126 transcription initiation factor TFIID subunit 12	sp|Q9SR71|TAF12_ARATH Transcription initiation factor TFIID subunit 12 OS=Arabidopsis thaliana GN=TAF12 PE=1 SV=1//3.7446e-166
	BnaC01g35600D	24.8042	22.5189	69.591	59.5602	UP	FALSE	FALSE	UP	NF-YB3; nuclear transcription factor Y subunit B-3	sp|O23310|NFYB3_ARATH Nuclear transcription factor Y subunit B-3 OS=Arabidopsis thaliana GN=NFYB3 PE=2 SV=1//1.55997e-78
	BnaC01g38370D	3.83644	4.86832	8.2069	7.46112	UP	FALSE	FALSE	UP	NF-YC11; nuclear factor Y, subunit C11	sp|A0JPP1|NC2A_RAT Dr1-associated corepressor OS=Rattus norvegicus GN=Drap1 PE=2 SV=1//1.15004e-28
	BnaC02g08740D	0.396895	0.595893	1.12429	1.4178	UP	FALSE	FALSE	UP	Histone superfamily protein	sp|A0JPP1|NC2A_RAT Dr1-associated corepressor OS=Rattus norvegicus GN=Drap1 PE=2 SV=1//8.92538e-31
	BnaC02g33400D	20.1358	17.8078	66.735	82.9704	UP	FALSE	FALSE	UP	NF-YB2; nuclear transcription factor Y subunit B-2	sp|Q9FGJ3|NFYB2_ARATH Nuclear transcription factor Y subunit B-2 OS=Arabidopsis thaliana GN=NFYB2 PE=2 SV=1//8.52673e-80
	BnaC03g20500D	6.03792	6.25032	22.5238	26.0032	UP	FALSE	FALSE	UP	NF-YB8; nuclear transcription factor Y subunit B-8	sp|Q8VYK4|NFYB8_ARATH Nuclear transcription factor Y subunit B-8 OS=Arabidopsis thaliana GN=NFYB8 PE=2 SV=1//2.19223e-82
	BnaC03g26430D	134.205	138.113	244.208	313.843	UP	FALSE	FALSE	UP	HTB1; histone H2B; K11252 histone H2B	sp|Q9LQQ4|H2B1_ARATH Histone H2B.1 OS=Arabidopsis thaliana GN=At1g07790 PE=1 SV=3//4.13061e-60
	BnaC03g37550D	5.28863	4.94532	5.93053	7.51409	UP	FALSE	FALSE	UP	NF-YC11; nuclear factor Y, subunit C11	sp|A0JPP1|NC2A_RAT Dr1-associated corepressor OS=Rattus norvegicus GN=Drap1 PE=2 SV=1//2.05407e-30
	BnaC03g39380D	94.3038	80.5806	187.927	132.566	UP	DOWN	FALSE	UP	NF-YB3; nuclear transcription factor Y subunit B-3	sp|O23310|NFYB3_ARATH Nuclear transcription factor Y subunit B-3 OS=Arabidopsis thaliana GN=NFYB3 PE=2 SV=1//6.07281e-82
	BnaC04g15480D	336.964	321.419	366.339	428.997	UP	FALSE	FALSE	UP	HTB4; histone H2B; K11252 histone H2B	sp|P40283|H2B11_ARATH Histone H2B.11 OS=Arabidopsis thaliana GN=At5g59910 PE=1 SV=5//2.11395e-60
	BnaC05g23480D	0.259677	0.269988	9.15411	8.33657	UP	FALSE	FALSE	UP	NF-YA7; nuclear transcription factor Y subunit A-7; K08064 nuclear transcription factor Y, alpha	sp|Q84JP1|NFYA7_ARATH Nuclear transcription factor Y subunit A-7 OS=Arabidopsis thaliana GN=NFYA7 PE=2 SV=1//6.23834e-72
	BnaC05g31370D	3.48413	3.38464	5.65204	4.99608	UP	FALSE	FALSE	UP	NF-YA9; nuclear transcription factor Y subunit A-9; K08064 nuclear transcription factor Y, alpha	sp|Q945M9|NFYA9_ARATH Nuclear transcription factor Y subunit A-9 OS=Arabidopsis thaliana GN=NFYA9 PE=2 SV=1//1.75147e-138
	BnaC05g37390D	69.2797	60.2851	122.045	87.3291	UP	DOWN	FALSE	UP	NF-YB3; nuclear transcription factor Y subunit B-3	sp|O23310|NFYB3_ARATH Nuclear transcription factor Y subunit B-3 OS=Arabidopsis thaliana GN=NFYB3 PE=2 SV=1//5.72331e-78
	BnaC07g20410D	2.16942	2.42061	12.5165	8.89494	UP	DOWN	FALSE	UP	DNA-binding protein-like protein	sp|Q84W66|NFYB6_ARATH Nuclear transcription factor Y subunit B-6 OS=Arabidopsis thaliana GN=NFYB6 PE=1 SV=2//1.12546e-133
	BnaC08g24430D	2.41225	3.3629	5.39177	6.02616	UP	FALSE	FALSE	UP	NF-YB10; nuclear transcription factor Y subunit B-10	sp|Q67XJ2|NFYBA_ARATH Nuclear transcription factor Y subunit B-10 OS=Arabidopsis thaliana GN=NFYB10 PE=2 SV=1//8.26803e-68
	BnaC09g20320D	23.0589	21.378	189.861	149.601	UP	DOWN	FALSE	UP	NF-YB2; nuclear transcription factor Y subunit B-2	sp|Q9FGJ3|NFYB2_ARATH Nuclear transcription factor Y subunit B-2 OS=Arabidopsis thaliana GN=NFYB2 PE=2 SV=1//1.8246e-82
	BnaC09g30950D	2.48209	2.11722	6.16641	6.72073	UP	FALSE	FALSE	UP	RAT5; histone H2A 1; K11251 histone H2A	sp|Q9LD28|H2A6_ARATH Histone H2A.6 OS=Arabidopsis thaliana GN=RAT5 PE=1 SV=1//1.45203e-57
	BnaC09g44190D	3.66525	3.07899	14.1934	14.0029	UP	FALSE	FALSE	UP	NF-YA1; nuclear transcription factor Y subunit A-1; K08064 nuclear transcription factor Y, alpha	sp|Q9LXV5|NFYA1_ARATH Nuclear transcription factor Y subunit A-1 OS=Arabidopsis thaliana GN=NFYA1 PE=2 SV=1//2.52652e-118
	BnaC09g47720D	8.14628	8.30735	14.5531	13.5802	UP	FALSE	FALSE	UP	NF-YB12; nuclear factor Y, subunit B12	sp|P49592|NC2B_ARATH Protein Dr1 homolog OS=Arabidopsis thaliana GN=DR1 PE=2 SV=1//2.28204e-65
	BnaCnng77830D	132.83	135.509	206.776	233.806	UP	FALSE	FALSE	UP	HTB4; histone H2B; K11252 histone H2B	sp|P40283|H2B11_ARATH Histone H2B.11 OS=Arabidopsis thaliana GN=At5g59910 PE=1 SV=5//1.37247e-59
CPP(3)	BnaA05g16930D	2.04729	2.37206	0.0998986	0.22668	DOWN	FALSE	FALSE	DOWN	TSO1; putative DNA binding protein TSO1	sp|Q9LUI3|TSO1_ARATH CRC domain-containing protein TSO1 OS=Arabidopsis thaliana GN=TSO1 PE=1 SV=1//0
	BnaA06g27870D	0.331573	0.415335	5.06163	4.28482	UP	FALSE	FALSE	UP	Tesmin/TSO1-like CXC domain-containing protein	sp|F4JY84|TCX7_ARATH Protein tesmin/TSO1-like CXC 7 OS=Arabidopsis thaliana GN=TCX7 PE=1 SV=1//0
	BnaC07g29080D	0.303958	0.313536	1.46411	1.16512	UP	FALSE	FALSE	UP	Tesmin/TSO1-like CXC domain-containing protein	sp|F4JY84|TCX7_ARATH Protein tesmin/TSO1-like CXC 7 OS=Arabidopsis thaliana GN=TCX7 PE=1 SV=1//0
CSD(5)	BnaA01g01560D	6.91697	16.9943	17.2544	34.6214	UP	UP	UP	UP	CSDP1; cold shock protein 1; K09250 cellular nucleic acid-binding protein	sp|O65639|CSP1_ARATH Cold shock protein 1 OS=Arabidopsis thaliana GN=CSP1 PE=1 SV=1//3.56884e-09
	BnaA04g11900D	37.8561	36.3296	42.1088	50.2439	UP	FALSE	FALSE	UP	GRP2B; glycine-rich protein 2B	sp|Q38896|CSP4_ARATH Cold shock domain-containing protein 4 OS=Arabidopsis thaliana GN=CSP4 PE=1 SV=1//5.46904e-51
	BnaA07g02430D	22.8376	22.6239	41.7748	44.6519	UP	FALSE	FALSE	UP	CSP3; cold shock domain protein 3; K09250 cellular nucleic acid-binding protein	sp|Q94C69|CSP3_ARATH Cold shock domain-containing protein 3 OS=Arabidopsis thaliana GN=CSP3 PE=1 SV=1//2.79085e-58
	BnaA09g43450D	117.641	113.766	182.722	188.207	UP	FALSE	FALSE	UP	GRP2B; glycine-rich protein 2B	sp|Q38896|CSP4_ARATH Cold shock domain-containing protein 4 OS=Arabidopsis thaliana GN=CSP4 PE=1 SV=1//3.72101e-40
	BnaCnng42010D	21.5547	21.8908	52.5951	50.7405	UP	FALSE	FALSE	UP	CSP3; cold shock domain protein 3; K09250 cellular nucleic acid-binding protein	sp|Q94C69|CSP3_ARATH Cold shock domain-containing protein 3 OS=Arabidopsis thaliana GN=CSP3 PE=1 SV=1//1.02204e-07
DBP(2)	BnaA09g40810D	7.22019	7.55252	23.144	24.0051	UP	FALSE	FALSE	UP	DBP1; DNA-binding protein phosphatase 1; K14803 protein phosphatase 2C homolog 2/3 [EC:3.1.3.16]	sp|Q9SLA1|P2C22_ARATH Probable protein phosphatase 2C 22 OS=Arabidopsis thaliana GN=At2g25620 PE=2 SV=1//0
	BnaC08g33310D	9.24698	7.89932	10.5033	10.5057	UP	FALSE	FALSE	UP	DBP1; DNA-binding protein phosphatase 1; K14803 protein phosphatase 2C homolog 2/3 [EC:3.1.3.16]	sp|Q9SLA1|P2C22_ARATH Probable protein phosphatase 2C 22 OS=Arabidopsis thaliana GN=At2g25620 PE=2 SV=1//0
DDT(3)	BnaA02g01250D	2.73708	3.20528	9.33348	8.03244	UP	FALSE	FALSE	UP	PHD-finger and DNA binding domain-containing protein	sp|Q9W0T1|NU301_DROME Nucleosome-remodeling factor subunit NURF301 OS=Drosophila melanogaster GN=E(bx) PE=1 SV=2//1.24038e-15
	BnaA03g02600D	0.737961	1.78165	0.148662	0.28495	DOWN	FALSE	UP	DOWN	DDT domain-containing protein	sp|Q54ST3|Y2237_DICDI DDT domain-containing protein DDB_G0282237 OS=Dictyostelium discoideum GN=DDB_G0282237 PE=3 SV=1//2.91689e-08
	BnaC02g04340D	0.478287	0.426646	0.868705	1.16896	UP	FALSE	FALSE	UP	PHD-finger and DNA binding domain-containing protein	sp|F4KBP5|CHR4_ARATH Protein CHROMATIN REMODELING 4 OS=Arabidopsis thaliana GN=CHR4 PE=2 SV=1//3.71054e-06
E2F-DP(7)	BnaA03g00880D	4.18707	8.37761	6.77499	13.9876	UP	UP	UP	UP	DPB; transcription factor DP	sp|Q9FNY2|DPB_ARATH Transcription factor-like protein DPB OS=Arabidopsis thaliana GN=DPB PE=1 SV=1//7.09654e-157
	BnaA08g03620D	1.3688	1.54057	5.93752	3.89154	UP	DOWN	FALSE	UP	ATE2F2; transcription factor E2FC; K06620 transcription factor E2F3	sp|Q9FV70|E2FC_ARATH Transcription factor E2FC OS=Arabidopsis thaliana GN=E2FC PE=1 SV=1//0
	BnaA10g14120D	1.16905	0.704117	8.05294	3.53794	UP	DOWN	FALSE	UP	E2F1; E2F transcription factor 1; K06620 transcription factor E2F3	sp|Q9FV71|E2FB_ARATH Transcription factor E2FB OS=Arabidopsis thaliana GN=E2FB PE=1 SV=1//0
	BnaC02g05860D	1.60148	1.66937	0.300359	0.703904	FALSE	FALSE	FALSE	DOWN	DEL2; DP-E2F-like 2	sp|Q9LFQ9|E2FD_ARATH E2F transcription factor-like E2FD OS=Arabidopsis thaliana GN=E2FD PE=1 SV=1//1.96536e-157
	BnaC03g01210D	4.73737	1.66164	3.64755	2.54297	UP	FALSE	DOWN	FALSE	DPB; transcription factor DP	sp|Q9FNY2|DPB_ARATH Transcription factor-like protein DPB OS=Arabidopsis thaliana GN=DPB PE=1 SV=1//7.98518e-143
	BnaC03g10740D	0.855306	0.810198	1.80856	1.80966	UP	FALSE	FALSE	UP	E2F1; E2F transcription factor 1; K06620 transcription factor E2F3	sp|Q9FV71|E2FB_ARATH Transcription factor E2FB OS=Arabidopsis thaliana GN=E2FB PE=1 SV=1//0
	BnaC05g37870D	1.47868	1.9166	8.46565	9.69727	UP	FALSE	FALSE	UP	E2F1; E2F transcription factor 1; K06620 transcription factor E2F3	sp|Q9FV71|E2FB_ARATH Transcription factor E2FB OS=Arabidopsis thaliana GN=E2FB PE=1 SV=1//0
EIL(9)	BnaA01g36840D	2.44614	2.07537	11.5321	11.9963	UP	FALSE	FALSE	UP	EIN3; protein ethylene insensitive 3; K14514 ethylene-insensitive protein 3	sp|O24606|EIN3_ARATH Protein ETHYLENE INSENSITIVE 3 OS=Arabidopsis thaliana GN=EIN3 PE=1 SV=1//9.59236e-73
	BnaA03g22560D	3.96482	4.05456	14.9552	15.2549	UP	FALSE	FALSE	UP	EIL1; ethylene insensitive 3-like 1 protein; K14514 ethylene-insensitive protein 3	sp|Q9SLH0|EIL1_ARATH ETHYLENE INSENSITIVE 3-like 1 protein OS=Arabidopsis thaliana GN=EIL1 PE=1 SV=1//0
	BnaA05g20140D	20.4025	22.0702	41.0859	35.3457	UP	FALSE	FALSE	UP	EIN3; protein ethylene insensitive 3; K14514 ethylene-insensitive protein 3	sp|O24606|EIN3_ARATH Protein ETHYLENE INSENSITIVE 3 OS=Arabidopsis thaliana GN=EIN3 PE=1 SV=1//6.47152e-96
	BnaA06g24030D	0.19929	0.328417	4.34576	3.20237	UP	FALSE	FALSE	UP	Ethylene insensitive 3 family protein; K14514 ethylene-insensitive protein 3	sp|Q9FJQ5|EIL5_ARATH ETHYLENE INSENSITIVE 3-like 5 protein OS=Arabidopsis thaliana GN=EIL5 PE=2 SV=1//1.66884e-70
	BnaA07g39030D	3.27864	3.71078	20.8514	17.8598	UP	FALSE	FALSE	UP	EIL3; ethylene insensitive 3-like 3 protein; K14514 ethylene-insensitive protein 3	sp|O23116|EIL3_ARATH ETHYLENE INSENSITIVE 3-like 3 protein OS=Arabidopsis thaliana GN=EIL3 PE=1 SV=1//0
	BnaC01g32460D	2.94221	3.0141	10.6525	9.42299	UP	FALSE	FALSE	UP	EIN3; protein ethylene insensitive 3; K14514 ethylene-insensitive protein 3	sp|O24606|EIN3_ARATH Protein ETHYLENE INSENSITIVE 3 OS=Arabidopsis thaliana GN=EIN3 PE=1 SV=1//0
	BnaC05g31510D	20.394	20.7146	37.3614	34.0763	UP	FALSE	FALSE	UP	EIN3; protein ethylene insensitive 3; K14514 ethylene-insensitive protein 3	sp|O24606|EIN3_ARATH Protein ETHYLENE INSENSITIVE 3 OS=Arabidopsis thaliana GN=EIN3 PE=1 SV=1//3.61235e-96
	BnaC06g23450D	2.37178	2.29579	18.7133	16.308	UP	FALSE	FALSE	UP	EIL3; ethylene insensitive 3-like 3 protein; K14514 ethylene-insensitive protein 3	sp|O23116|EIL3_ARATH ETHYLENE INSENSITIVE 3-like 3 protein OS=Arabidopsis thaliana GN=EIL3 PE=1 SV=1//0
	BnaC06g34570D	0.563006	0.597831	1.13593	1.41793	UP	FALSE	FALSE	UP	EIL3; ethylene insensitive 3-like 3 protein; K14514 ethylene-insensitive protein 3	sp|O23116|EIL3_ARATH ETHYLENE INSENSITIVE 3-like 3 protein OS=Arabidopsis thaliana GN=EIL3 PE=1 SV=1//0
FAR1(1)	BnaC06g17370D	1.44614	1.42537	2.07564	2.15117	UP	FALSE	FALSE	UP	Far-red impaired responsive (FAR1) family protein	sp|Q9SZL8|FRS5_ARATH Protein FAR1-RELATED SEQUENCE 5 OS=Arabidopsis thaliana GN=FRS5 PE=2 SV=1//8.86571e-25
FHA(9)	BnaA03g35810D	9.47649	10.0003	14.5176	14.7552	UP	FALSE	FALSE	UP	DDL; FHA domain-containing protein DDL; K13108 smad nuclear-interacting protein 1	sp|Q8W4D8|DDL_ARATH FHA domain-containing protein DDL OS=Arabidopsis thaliana GN=DDL PE=1 SV=1//2.86664e-112
	BnaA07g12170D	37.2827	36.4161	76.9749	73.0759	UP	FALSE	FALSE	UP	ABA1; zeaxanthin epoxidase; K09838 zeaxanthin epoxidase [EC:1.14.13.90]	sp|Q9FGC7|ZEP_ARATH Zeaxanthin epoxidase, chloroplastic OS=Arabidopsis thaliana GN=ZEP PE=1 SV=1//0
	BnaA09g03090D	3.90266	3.55488	16.5639	16.438	UP	FALSE	FALSE	UP	SMAD/FHA domain-containing protein	sp|Q9SFV2|FHA2_ARATH FHA domain-containing protein FHA2 OS=Arabidopsis thaliana GN=FHA2 PE=1 SV=1//1.56563e-152
	BnaA09g07610D	0.155492	0.197152	2.94492	2.3909	UP	FALSE	FALSE	UP	ABA1; zeaxanthin epoxidase; K09838 zeaxanthin epoxidase [EC:1.14.13.90]	sp|Q9FGC7|ZEP_ARATH Zeaxanthin epoxidase, chloroplastic OS=Arabidopsis thaliana GN=ZEP PE=1 SV=1//0
	BnaA10g15830D	8.72208	6.69477	14.487	12.5854	UP	FALSE	FALSE	UP	KAPP; kinase associated protein phosphatase; K01090 protein phosphatase [EC:3.1.3.16]	sp|P46014|P2C70_ARATH Protein phosphatase 2C 70 OS=Arabidopsis thaliana GN=KAPP PE=1 SV=2//0
	BnaC07g16350D	104.78	102.699	170.962	152.772	UP	FALSE	FALSE	UP	ABA1; zeaxanthin epoxidase; K09838 zeaxanthin epoxidase [EC:1.14.13.90]	sp|Q9FGC7|ZEP_ARATH Zeaxanthin epoxidase, chloroplastic OS=Arabidopsis thaliana GN=ZEP PE=1 SV=1//0
	BnaC09g02500D	0.865584	0.753136	4.08306	4.13442	UP	FALSE	FALSE	UP	SMAD/FHA domain-containing protein	sp|Q9SFV2|FHA2_ARATH FHA domain-containing protein FHA2 OS=Arabidopsis thaliana GN=FHA2 PE=1 SV=1//2.65776e-153
	BnaC09g07550D	2.07231	1.86361	46.2438	33.4549	UP	FALSE	FALSE	UP	ABA1; zeaxanthin epoxidase; K09838 zeaxanthin epoxidase [EC:1.14.13.90]	sp|Q9FGC7|ZEP_ARATH Zeaxanthin epoxidase, chloroplastic OS=Arabidopsis thaliana GN=ZEP PE=1 SV=1//0
	BnaC09g38410D	3.95762	3.61422	6.47558	6.18758	UP	FALSE	FALSE	UP	KAPP; kinase associated protein phosphatase; K01090 protein phosphatase [EC:3.1.3.16]	sp|P46014|P2C70_ARATH Protein phosphatase 2C 70 OS=Arabidopsis thaliana GN=KAPP PE=1 SV=2//0
G2-like(38)	BnaA01g00920D	1.07087	2.18048	3.46741	5.59611	UP	FALSE	FALSE	UP	myb family transcription factor	sp|Q9FGT7|ARR18_ARATH Two-component response regulator ARR18 OS=Arabidopsis thaliana GN=ARR18 PE=2 SV=2//4.29888e-12
	BnaA01g17750D	5.21734	5.02738	7.49485	6.50858	UP	FALSE	FALSE	UP	RR2; transcription factor response regulator 2; K14491 two-component response regulator ARR-B family	sp|Q9ZWJ9|ARR2_ARATH Two-component response regulator ARR2 OS=Arabidopsis thaliana GN=ARR2 PE=1 SV=1//0
	BnaA01g19880D	14.5981	14.8916	175.096	104.058	UP	DOWN	FALSE	UP	PCL1; transcription factor LUX	sp|Q9SNB4|PCL1_ARATH Transcription factor LUX OS=Arabidopsis thaliana GN=LUX PE=1 SV=1//1.35863e-133
	BnaA01g30110D	10.7254	13.7133	31.463	29.6601	UP	FALSE	FALSE	UP	myb-like HTH transcriptional regulator family protein	sp|Q8GUN5|PHL1_ARATH Protein PHR1-LIKE 1 OS=Arabidopsis thaliana GN=PHL1 PE=1 SV=1//5.8108e-41
	BnaA01g30340D	4.91526	5.11541	4.2871	7.75329	UP	UP	FALSE	FALSE	myb family transcription factor	sp|Q9SAK5|APL_ARATH Myb family transcription factor APL OS=Arabidopsis thaliana GN=APL PE=2 SV=2//8.41487e-67
	BnaA02g22550D	18.7239	14.2622	0.182541	0.428718	DOWN	FALSE	FALSE	DOWN	GLK2; transcription activator GLK2	sp|Q9FFH0|GLK2_ARATH Transcription activator GLK2 OS=Arabidopsis thaliana GN=GLK2 PE=1 SV=1//2.97012e-169
	BnaA02g30980D	0.508537	0.750502	1.00698	1.97473	UP	FALSE	FALSE	UP	protein PHR1-LIKE 1	sp|Q8GUN5|PHL1_ARATH Protein PHR1-LIKE 1 OS=Arabidopsis thaliana GN=PHL1 PE=1 SV=1//0
	BnaA02g35660D	3.65235	2.53474	24.5223	38.6519	UP	UP	FALSE	UP	nitrate-inducible, GARP-type transcriptional repressor 1-like protein	sp|Q700D9|MYBF_ARATH Putative Myb family transcription factor At1g14600 OS=Arabidopsis thaliana GN=At1g14600 PE=2 SV=2//6.49018e-10
	BnaA03g06110D	4.10976	8.80189	0.335205	0.567703	DOWN	FALSE	UP	DOWN	KAN; transcription repressor KAN1	sp|Q93WJ9|KAN1_ARATH Transcription repressor KAN1 OS=Arabidopsis thaliana GN=KAN1 PE=1 SV=1//0
	BnaA03g31400D	4.57681	5.26113	8.43928	10.385	UP	FALSE	FALSE	UP	homeodomain-like superfamily protein	sp|Q9SNB4|PCL1_ARATH Transcription factor LUX OS=Arabidopsis thaliana GN=LUX PE=1 SV=1//7.87313e-26
	BnaA03g32590D	8.62563	7.97918	0.407957	0.939418	DOWN	FALSE	FALSE	DOWN	myb-like HTH transcriptional regulator family protein	sp|Q8GUN5|PHL1_ARATH Protein PHR1-LIKE 1 OS=Arabidopsis thaliana GN=PHL1 PE=1 SV=1//6.01282e-41
	BnaA03g37160D	9.54813	9.06742	14.1812	13.3736	UP	FALSE	FALSE	UP	myb family transcription factor	sp|Q9SAK5|APL_ARATH Myb family transcription factor APL OS=Arabidopsis thaliana GN=APL PE=2 SV=2//9.57906e-62
	BnaA03g58920D	2.79434	4.03435	0.09459	0.305356	DOWN	FALSE	FALSE	DOWN	PHR1; phosphate starvation response 1 protein	sp|Q8GUN5|PHL1_ARATH Protein PHR1-LIKE 1 OS=Arabidopsis thaliana GN=PHL1 PE=1 SV=1//2.48299e-38
	BnaA05g01930D	0.381574	0.989959	5.97447	10.2022	UP	FALSE	FALSE	UP	MYBC1; myb family transcription factor	sp|Q9SNB4|PCL1_ARATH Transcription factor LUX OS=Arabidopsis thaliana GN=LUX PE=1 SV=1//2.69824e-39
	BnaA05g37380D	5.33736	5.3147	9.77644	10.6071	UP	FALSE	FALSE	UP	myb family transcription factor	sp|Q9SAK5|APL_ARATH Myb family transcription factor APL OS=Arabidopsis thaliana GN=APL PE=2 SV=2//7.93197e-52
	BnaA06g17950D	13.3298	11.8862	106.402	67.5536	UP	DOWN	FALSE	UP	PCL1; transcription factor LUX	sp|Q9SNB4|PCL1_ARATH Transcription factor LUX OS=Arabidopsis thaliana GN=LUX PE=1 SV=1//9.17985e-31
	BnaA06g34360D	1.54171	1.80477	20.359	13.7461	UP	DOWN	FALSE	UP	putative transcription factor	sp|Q700D9|MYBF_ARATH Putative Myb family transcription factor At1g14600 OS=Arabidopsis thaliana GN=At1g14600 PE=2 SV=2//2.64635e-33
	BnaA07g00410D	12.7186	14.1069	0.417647	1.08403	DOWN	FALSE	FALSE	DOWN	GPRI1; transcription activator GLK1	sp|Q9SIV3|GLK1_ARATH Transcription activator GLK1 OS=Arabidopsis thaliana GN=GLK1 PE=1 SV=2//2.53719e-175
	BnaA07g20350D	1.15207	1.55692	2.6958	2.76049	UP	FALSE	FALSE	UP	APL; myb family transcription factor APL	sp|Q9SAK5|APL_ARATH Myb family transcription factor APL OS=Arabidopsis thaliana GN=APL PE=2 SV=2//0
	BnaA07g37120D	0.628634	0.907607	13.4149	22.4221	UP	FALSE	FALSE	UP	nitrate-inducible, GARP-type transcriptional repressor 1-like protein	sp|Q8GUN5|PHL1_ARATH Protein PHR1-LIKE 1 OS=Arabidopsis thaliana GN=PHL1 PE=1 SV=1//7.03084e-12
	BnaA08g05130D	4.78607	5.94117	0.218006	0.856029	DOWN	FALSE	FALSE	DOWN	UNE16; unfertilized embryo sac 16 protein / transcription factor	sp|Q9SAK5|APL_ARATH Myb family transcription factor APL OS=Arabidopsis thaliana GN=APL PE=2 SV=2//8.67787e-42
	BnaA08g15490D	1.83174	1.30741	6.59851	9.85054	UP	FALSE	FALSE	UP	myb family transcription factor	sp|Q9FGT7|ARR18_ARATH Two-component response regulator ARR18 OS=Arabidopsis thaliana GN=ARR18 PE=2 SV=2//1.01296e-10
	BnaA10g16590D	0.900656	1.40747	3.76422	3.88915	UP	FALSE	FALSE	UP	MYR1; myb-related protein 1	sp|Q9SAK5|APL_ARATH Myb family transcription factor APL OS=Arabidopsis thaliana GN=APL PE=2 SV=2//1.4049e-50
	BnaA10g17920D	1.51128	1.20205	0.0291089	0.12559	DOWN	FALSE	FALSE	DOWN	KAN; transcription repressor KAN1	sp|Q93WJ9|KAN1_ARATH Transcription repressor KAN1 OS=Arabidopsis thaliana GN=KAN1 PE=1 SV=1//0
	BnaAnng05640D	0.688724	0.860977	1.30409	1.14283	FALSE	FALSE	FALSE	UP	homeodomain-like superfamily protein	sp|Q9SAK5|APL_ARATH Myb family transcription factor APL OS=Arabidopsis thaliana GN=APL PE=2 SV=2//2.88927e-41
	BnaC01g01940D	16.4546	9.47864	21.5572	21.0709	UP	FALSE	FALSE	UP	myb family transcription factor	sp|Q9FGT7|ARR18_ARATH Two-component response regulator ARR18 OS=Arabidopsis thaliana GN=ARR18 PE=2 SV=2//5.33872e-12
	BnaC01g38060D	26.6411	26.7551	301.513	268.2	UP	FALSE	FALSE	UP	myb-like HTH transcriptional regulator family protein	sp|Q8GUN5|PHL1_ARATH Protein PHR1-LIKE 1 OS=Arabidopsis thaliana GN=PHL1 PE=1 SV=1//2.27324e-44
	BnaC02g18390D	4.41296	2.37993	21.7393	36.9473	UP	UP	FALSE	UP	nitrate-inducible, GARP-type transcriptional repressor 1-like protein	sp|Q700D9|MYBF_ARATH Putative Myb family transcription factor At1g14600 OS=Arabidopsis thaliana GN=At1g14600 PE=2 SV=2//5.87212e-10
	BnaC02g30900D	7.13063	8.18709	0.0471665	0.11698	DOWN	FALSE	FALSE	DOWN	GLK2; transcription activator GLK2	sp|Q9FFH0|GLK2_ARATH Transcription activator GLK2 OS=Arabidopsis thaliana GN=GLK2 PE=1 SV=1//6.71124e-153
	BnaC03g61720D	0.798437	0.607139	4.49272	4.42783	UP	FALSE	FALSE	UP	myb family transcription factor	sp|Q9FGT7|ARR18_ARATH Two-component response regulator ARR18 OS=Arabidopsis thaliana GN=ARR18 PE=2 SV=2//2.85924e-10
	BnaC04g52240D	0.655663	1.24986	5.13812	6.77578	UP	FALSE	FALSE	UP	MYBC1; myb family transcription factor	sp|Q9SNB4|PCL1_ARATH Transcription factor LUX OS=Arabidopsis thaliana GN=LUX PE=1 SV=1//7.18039e-38
	BnaC05g42310D	3.67978	4.14288	7.4833	7.20796	UP	FALSE	FALSE	UP	myb family transcription factor	sp|Q9SNB4|PCL1_ARATH Transcription factor LUX OS=Arabidopsis thaliana GN=LUX PE=1 SV=1//1.31828e-46
	BnaC06g39850D	2.41738	2.09533	3.47796	2.98174	UP	FALSE	FALSE	UP	APL; myb family transcription factor APL	sp|Q9SAK5|APL_ARATH Myb family transcription factor APL OS=Arabidopsis thaliana GN=APL PE=2 SV=2//0
	BnaC07g07340D	2.63295	3.48852	0.217506	0.544491	DOWN	FALSE	FALSE	DOWN	myb family transcription factor	sp|Q9LRN6|CML22_ARATH Probable calcium-binding protein CML22 OS=Arabidopsis thaliana GN=CML22 PE=3 SV=1//6.16001e-122
	BnaC07g11890D	0.702596	0.654841	5.10822	7.45689	UP	FALSE	FALSE	UP	nitrate-inducible, GARP-type transcriptional repressor 1-like protein	sp|Q8GUN5|PHL1_ARATH Protein PHR1-LIKE 1 OS=Arabidopsis thaliana GN=PHL1 PE=1 SV=1//8.77249e-12
	BnaC09g54190D	0.781877	1.13809	2.68331	3.5115	UP	FALSE	FALSE	UP	MYR1; myb-related protein 1	sp|Q9SAK5|APL_ARATH Myb family transcription factor APL OS=Arabidopsis thaliana GN=APL PE=2 SV=2//3.31747e-51
	BnaCnng37560D	12.6901	11.8146	81.9656	48.4142	UP	DOWN	FALSE	UP	PCL1; transcription factor LUX	sp|Q9SNB4|PCL1_ARATH Transcription factor LUX OS=Arabidopsis thaliana GN=LUX PE=1 SV=1//4.94428e-123
	BnaCnng54120D	1.35635	1.56746	0.104425	0.306213	DOWN	FALSE	FALSE	DOWN	KAN; transcription repressor KAN1	sp|Q93WJ9|KAN1_ARATH Transcription repressor KAN1 OS=Arabidopsis thaliana GN=KAN1 PE=1 SV=1//0
GeBP(6)	BnaA01g36220D	5.00318	4.58872	9.07848	6.67487	UP	FALSE	FALSE	UP	DNA-binding storekeeper protein-related transcriptional regulator	sp|Q9SB42|MDA1_ARATH Mediator-associated protein 1 OS=Arabidopsis thaliana GN=At4g25210 PE=1 SV=1//4.70316e-07
	BnaA06g29050D	26.1995	25.8367	86.1759	63.5203	UP	DOWN	FALSE	UP	DNA-binding storekeeper protein-related transcriptional regulator	sp|O34598|GUAD_BACSU Guanine deaminase OS=Bacillus subtilis (strain 168) GN=guaD PE=1 SV=1//3.81837e-27
	BnaAnng10740D	13.19	13.7286	21.6779	18.8947	UP	FALSE	FALSE	UP	DNA-binding storekeeper protein-related transcriptional regulator	sp|Q9SB42|MDA1_ARATH Mediator-associated protein 1 OS=Arabidopsis thaliana GN=At4g25210 PE=1 SV=1//4.42357e-14
	BnaC05g46940D	0.491125	0.576384	1.08067	0.962828	FALSE	FALSE	FALSE	UP	DNA-binding storekeeper protein-related transcriptional regulator	sp|Q9SB42|MDA1_ARATH Mediator-associated protein 1 OS=Arabidopsis thaliana GN=At4g25210 PE=1 SV=1//1.45866e-13
	BnaC07g27630D	6.71143	6.17999	9.91327	10.6236	UP	FALSE	FALSE	UP	DNA-binding storekeeper protein-related transcriptional regulator	sp|Q9SB42|MDA1_ARATH Mediator-associated protein 1 OS=Arabidopsis thaliana GN=At4g25210 PE=1 SV=1//1.12057e-11
	BnaCnng18000D	0.427636	0.789799	1.3626	1.35063	UP	FALSE	FALSE	UP	DNA-binding storekeeper protein-related transcriptional regulator	sp|Q9SB42|MDA1_ARATH Mediator-associated protein 1 OS=Arabidopsis thaliana GN=At4g25210 PE=1 SV=1//1.11357e-22
GNAT(20)	BnaA01g00340D	0.640233	1.31599	0.845605	1.67368	UP	FALSE	FALSE	UP	NAGS2; N-acetyl-l-glutamate synthase 2; K14682 amino-acid N-acetyltransferase [EC:2.3.1.1]	sp|B5X4Z4|NAGS2_ARATH Probable amino-acid acetyltransferase NAGS2, chloroplastic OS=Arabidopsis thaliana GN=NAGS2 PE=2 SV=1//0
	BnaA03g06200D	4.55519	4.61492	12.3955	12.9529	UP	FALSE	FALSE	UP	GCN5-related N-acetyltransferase (GNAT) family protein	sp|Q9M8T9|MCC1_ARATH Histone acetyltransferase MCC1 OS=Arabidopsis thaliana GN=MCC1 PE=2 SV=1//1.22526e-127
	BnaA03g23430D	2.97696	3.36287	8.42143	7.7586	UP	FALSE	FALSE	UP	ELO3; Elongator complex protein 3; K07739 elongator complex protein 3 [EC:2.3.1.48]	sp|Q93ZR1|ELP3_ARATH Elongator complex protein 3 OS=Arabidopsis thaliana GN=HAG3 PE=1 SV=1//0
	BnaA04g28860D	0.20348	0.170724	90.56	97.0323	UP	FALSE	FALSE	UP	Acyl-CoA N-acyltransferases (NAT) superfamily protein	sp|P05332|YP20_BACLI Uncharacterized N-acetyltransferase p20 OS=Bacillus licheniformis GN=p20 PE=3 SV=1//8.01801e-19
	BnaA04g28870D	2.47366	3.37464	1094.5	1466.13	UP	FALSE	FALSE	UP	Acyl-CoA N-acyltransferases (NAT) superfamily protein	sp|P05332|YP20_BACLI Uncharacterized N-acetyltransferase p20 OS=Bacillus licheniformis GN=p20 PE=3 SV=1//3.89046e-19
	BnaA05g10930D	0.47322	0.66565	181.404	212.478	UP	FALSE	FALSE	UP	Acyl-CoA N-acyltransferases (NAT) superfamily protein	sp|P05332|YP20_BACLI Uncharacterized N-acetyltransferase p20 OS=Bacillus licheniformis GN=p20 PE=3 SV=1//5.67898e-21
	BnaA05g10960D	0.726351	0.9109	260.363	322.992	UP	FALSE	FALSE	UP	Acyl-CoA N-acyltransferases (NAT) superfamily protein	sp|P05332|YP20_BACLI Uncharacterized N-acetyltransferase p20 OS=Bacillus licheniformis GN=p20 PE=3 SV=1//5.29235e-20
	BnaA07g04340D	9.83322	9.13615	13.8903	13.8414	UP	FALSE	FALSE	UP	acyl-CoA N-acyltransferases-like protein	-//-
	BnaC02g06230D	0.22171	0.313209	2.26879	2.01672	UP	FALSE	FALSE	UP	GNA1; glucose-6-phosphate acetyltransferase 1; K00621 glucosamine-phosphate N-acetyltransferase [EC:2.3.1.4]	sp|Q9LFU9|GNA1_ARATH Glucosamine 6-phosphate N-acetyltransferase OS=Arabidopsis thaliana GN=GNA1 PE=1 SV=1//8.55605e-85
	BnaC03g07970D	6.49463	6.27009	7.84148	8.0265	UP	FALSE	FALSE	UP	GCN5-related N-acetyltransferase (GNAT) family protein	sp|Q9M8T9|MCC1_ARATH Histone acetyltransferase MCC1 OS=Arabidopsis thaliana GN=MCC1 PE=2 SV=1//7.94568e-133
	BnaC03g27760D	2.31792	2.4231	3.38252	3.23598	UP	FALSE	FALSE	UP	ELO3; Elongator complex protein 3; K07739 elongator complex protein 3 [EC:2.3.1.48]	sp|Q93ZR1|ELP3_ARATH Elongator complex protein 3 OS=Arabidopsis thaliana GN=HAG3 PE=1 SV=1//0
	BnaC04g12680D	0.117841	0.242896	73.8768	126.33	UP	FALSE	FALSE	UP	Acyl-CoA N-acyltransferases (NAT) superfamily protein	sp|P05332|YP20_BACLI Uncharacterized N-acetyltransferase p20 OS=Bacillus licheniformis GN=p20 PE=3 SV=1//2.30078e-19
	BnaC04g42720D	2.49489	3.00787	964.482	1274.67	UP	FALSE	FALSE	UP	Acyl-CoA N-acyltransferases (NAT) superfamily protein	sp|P05332|YP20_BACLI Uncharacterized N-acetyltransferase p20 OS=Bacillus licheniformis GN=p20 PE=3 SV=1//4.73271e-20
	BnaC04g42730D	0.467493	0.483879	153.983	148.797	UP	FALSE	FALSE	UP	Acyl-CoA N-acyltransferases (NAT) superfamily protein	sp|P05332|YP20_BACLI Uncharacterized N-acetyltransferase p20 OS=Bacillus licheniformis GN=p20 PE=3 SV=1//2.84652e-18
	BnaC05g01770D	22.5216	21.7856	34.8165	37.9473	UP	FALSE	FALSE	UP	Acyl-CoA N-acyltransferases superfamily protein; K17972 N-terminal acetyltransferase B complex catalytic subunit [EC:2.3.1.88]	sp|Q8SSN5|NAA20_DICDI N-alpha-acetyltransferase 20 OS=Dictyostelium discoideum GN=nat5 PE=3 SV=2//3.85643e-74
	BnaC07g04350D	21.0669	19.38	30.4641	31.7312	UP	FALSE	FALSE	UP	acyl-CoA N-acyltransferases-like protein	-//-
	BnaC07g46600D	1.10656	1.60157	0.0138133	0.168641	DOWN	FALSE	FALSE	DOWN	HLS1; putative N-acetyltransferase	sp|Q42381|HLS1_ARATH Probable N-acetyltransferase HLS1 OS=Arabidopsis thaliana GN=HLS1 PE=1 SV=1//0
	BnaC07g46690D	1.95712	2.06962	3.67958	4.02395	UP	FALSE	FALSE	UP	NAGS1; N-acetyl-l-glutamate synthase 1; K14682 amino-acid N-acetyltransferase [EC:2.3.1.1]	sp|B5X4Z4|NAGS2_ARATH Probable amino-acid acetyltransferase NAGS2, chloroplastic OS=Arabidopsis thaliana GN=NAGS2 PE=2 SV=1//0
	BnaC09g41050D	3.91012	3.31096	4.92089	5.18009	UP	FALSE	FALSE	UP	GCN5-related N-acetyltransferase (GNAT) family protein	sp|Q9M8T9|MCC1_ARATH Histone acetyltransferase MCC1 OS=Arabidopsis thaliana GN=MCC1 PE=2 SV=1//1.61518e-113
	BnaC09g45270D	20.5081	19.2617	24.9535	30.6867	UP	FALSE	FALSE	UP	GCN5-related N-acetyltransferase (GNAT) family protein	sp|Q6DBY2|NAA50_DANRE N-alpha-acetyltransferase 50 OS=Danio rerio GN=naa50 PE=1 SV=1//4.77522e-53
GRAS(36)	BnaA01g01120D	0.617539	1.81705	0.870194	1.12193	FALSE	FALSE	UP	UP	scarecrow-like protein 15	sp|O23210|SCL15_ARATH Scarecrow-like protein 15 OS=Arabidopsis thaliana GN=SCL15 PE=2 SV=3//0
	BnaA01g17860D	3.95463	3.32708	27.8964	24.6629	UP	FALSE	FALSE	UP	SCL13; protein scarecrow-like 13	sp|Q9M0M5|SCL13_ARATH Scarecrow-like protein 13 OS=Arabidopsis thaliana GN=SCL13 PE=2 SV=2//0
	BnaA01g19870D	4.0103	3.50043	403.985	397.42	UP	FALSE	FALSE	UP	scarecrow-like protein 30	sp|Q9SNB8|SCL30_ARATH Scarecrow-like protein 30 OS=Arabidopsis thaliana GN=SCL30 PE=1 SV=1//0
	BnaA02g10830D	0.168179	0.25954	5.17713	4.5443	UP	FALSE	FALSE	UP	SCL8; scarecrow-like protein 8	sp|Q9FYR7|SCL8_ARATH Scarecrow-like protein 8 OS=Arabidopsis thaliana GN=SCL8 PE=2 SV=1//0
	BnaA04g01210D	6.53713	6.26516	0.178765	0.407589	DOWN	FALSE	FALSE	DOWN	HAM2; protein LOST MERISTEM 2	sp|Q9M000|SCL22_ARATH Scarecrow-like protein 22 OS=Arabidopsis thaliana GN=SCL22 PE=2 SV=1//0
	BnaA04g16850D	0.962391	0.947538	1.29042	1.43354	UP	FALSE	FALSE	UP	scarecrow-like protein 34	sp|P0C883|SCL33_ARATH Scarecrow-like protein 33 OS=Arabidopsis thaliana GN=SCL33 PE=1 SV=1//0
	BnaA05g32630D	12.1158	12.6638	0.0984402	0.383007	DOWN	FALSE	FALSE	DOWN	RGL2; DELLA protein RGL2; K14494 DELLA protein	sp|Q7Y1B6|GAI_SOLLC DELLA protein GAI OS=Solanum lycopersicum GN=GAI PE=2 SV=1//4.72472e-29
	BnaA06g02700D	18.7692	16.8855	154.411	177.266	UP	FALSE	FALSE	UP	SCL5; scarecrow-like protein 5	sp|Q8H125|SCL5_ARATH Scarecrow-like protein 5 OS=Arabidopsis thaliana GN=SCL5 PE=2 SV=1//5.22923e-26
	BnaA06g15170D	3.63998	3.30041	13.7555	14.9505	UP	FALSE	FALSE	UP	SCL1; scarecrow-like protein 1	sp|Q9SDQ3|SCL1_ARATH Scarecrow-like protein 1 OS=Arabidopsis thaliana GN=SCL1 PE=2 SV=1//0
	BnaA07g14220D	0.882514	1.00857	3.06024	3.1072	UP	FALSE	FALSE	UP	GRAS family transcription factor	sp|P0C884|SCL34_ARATH Scarecrow-like protein 34 OS=Arabidopsis thaliana GN=SCL34 PE=3 SV=1//0
	BnaA07g14230D	0.592715	0.694406	2.29838	1.72059	UP	FALSE	FALSE	UP	scarecrow-like protein 34	sp|P0C883|SCL33_ARATH Scarecrow-like protein 33 OS=Arabidopsis thaliana GN=SCL33 PE=1 SV=1//0
	BnaA08g30240D	6.52564	5.44696	39.4423	33.9656	UP	FALSE	FALSE	UP	SCL13; protein scarecrow-like 13	sp|Q9M0M5|SCL13_ARATH Scarecrow-like protein 13 OS=Arabidopsis thaliana GN=SCL13 PE=2 SV=2//0
	BnaA09g49380D	0.0555408	0.0483487	11.2486	24.0326	UP	UP	FALSE	UP	GRAS family transcription factor	sp|Q3EDH0|SCL31_ARATH Scarecrow-like protein 31 OS=Arabidopsis thaliana GN=SCL31 PE=2 SV=3//0
	BnaA10g07400D	4.21126	4.75425	18.5673	13.1659	UP	DOWN	FALSE	UP	SCL8; scarecrow-like protein 8	sp|Q9FYR7|SCL8_ARATH Scarecrow-like protein 8 OS=Arabidopsis thaliana GN=SCL8 PE=2 SV=1//0
	BnaA10g12460D	3.14758	1.70515	22.4369	13.9497	UP	DOWN	DOWN	UP	GRAS family transcription factor	sp|Q9LTI5|SCL11_ARATH Scarecrow-like protein 11 OS=Arabidopsis thaliana GN=SCL11 PE=2 SV=1//0
	BnaA10g17240D	1.48118	1.90139	3.77537	3.82899	UP	FALSE	FALSE	UP	RGL3; DELLA protein RGL3; K14494 DELLA protein	sp|Q9LF53|RGL3_ARATH DELLA protein RGL3 OS=Arabidopsis thaliana GN=RGL3 PE=1 SV=1//0
	BnaAnng36390D	10.4126	10.9014	14.8547	18.3306	UP	FALSE	FALSE	UP	PAT1; GRAS family transcription factor	sp|Q9LDL7|PAT1_ARATH Scarecrow-like transcription factor PAT1 OS=Arabidopsis thaliana GN=PAT1 PE=2 SV=1//0
	BnaC01g21110D	6.54688	5.44728	59.0938	57.7871	UP	FALSE	FALSE	UP	SCL13; protein scarecrow-like 13	sp|Q9M0M5|SCL13_ARATH Scarecrow-like protein 13 OS=Arabidopsis thaliana GN=SCL13 PE=2 SV=2//0
	BnaC01g24660D	2.60375	1.93642	277.168	257.48	UP	FALSE	FALSE	UP	scarecrow-like protein 30	sp|Q9SNB8|SCL30_ARATH Scarecrow-like protein 30 OS=Arabidopsis thaliana GN=SCL30 PE=1 SV=1//0
	BnaC01g24670D	6.17141	5.14737	548.937	652.181	UP	FALSE	FALSE	UP	scarecrow-like protein 30	sp|Q9SNB8|SCL30_ARATH Scarecrow-like protein 30 OS=Arabidopsis thaliana GN=SCL30 PE=1 SV=1//2.44134e-53
	BnaC02g15050D	1.53303	1.90894	19.6457	20.3847	UP	FALSE	FALSE	UP	SCL8; scarecrow-like protein 8	sp|Q9FYR7|SCL8_ARATH Scarecrow-like protein 8 OS=Arabidopsis thaliana GN=SCL8 PE=2 SV=1//0
	BnaC03g28680D	0.572194	0.864896	3.59223	4.19044	UP	FALSE	FALSE	UP	SCL21; scarecrow-like protein 21	sp|Q9S7H5|SCL21_ARATH Scarecrow-like protein 21 OS=Arabidopsis thaliana GN=SCL21 PE=1 SV=1//5.31871e-31
	BnaC04g15290D	0.652015	0.893269	1.88217	2.03408	FALSE	FALSE	FALSE	UP	GRAS family transcription factor	sp|P0C884|SCL34_ARATH Scarecrow-like protein 34 OS=Arabidopsis thaliana GN=SCL34 PE=3 SV=1//0
	BnaC05g26710D	1.41205	1.82001	6.15014	7.26942	UP	FALSE	FALSE	UP	SCL5; scarecrow-like protein 5	sp|Q8H125|SCL5_ARATH Scarecrow-like protein 5 OS=Arabidopsis thaliana GN=SCL5 PE=2 SV=1//1.93303e-152
	BnaC06g03750D	10.1973	9.34689	56.351	47.2472	UP	FALSE	FALSE	UP	SCL5; scarecrow-like protein 5	sp|Q8H125|SCL5_ARATH Scarecrow-like protein 5 OS=Arabidopsis thaliana GN=SCL5 PE=2 SV=1//2.10913e-23
	BnaC07g03310D	0.782524	0.831604	2.3923	1.41736	UP	DOWN	FALSE	UP	scarecrow-like protein 15	sp|O23210|SCL15_ARATH Scarecrow-like protein 15 OS=Arabidopsis thaliana GN=SCL15 PE=2 SV=3//0
	BnaC07g14490D	2.34002	2.48099	15.5668	15.6124	UP	FALSE	FALSE	UP	SCL1; scarecrow-like protein 1	sp|Q9SDQ3|SCL1_ARATH Scarecrow-like protein 1 OS=Arabidopsis thaliana GN=SCL1 PE=2 SV=1//0
	BnaC07g49170D	1.70683	1.7161	3.55341	7.37333	UP	UP	FALSE	UP	PAT1; GRAS family transcription factor	sp|Q9LDL7|PAT1_ARATH Scarecrow-like transcription factor PAT1 OS=Arabidopsis thaliana GN=PAT1 PE=2 SV=1//0
	BnaC08g02280D	7.89779	7.46526	10.2529	10.8008	UP	FALSE	FALSE	UP	SCL14; GRAS family transcription factor SCL14	sp|Q9XE58|SCL14_ARATH Scarecrow-like protein 14 OS=Arabidopsis thaliana GN=SCL14 PE=2 SV=2//0
	BnaC09g28480D	5.79779	6.96949	8.99387	8.72272	UP	FALSE	FALSE	UP	SCL8; scarecrow-like protein 8	sp|Q9FYR7|SCL8_ARATH Scarecrow-like protein 8 OS=Arabidopsis thaliana GN=SCL8 PE=2 SV=1//0
	BnaC09g34770D	3.7467	3.02752	20.3015	21.6269	UP	FALSE	FALSE	UP	GRAS family transcription factor	sp|Q9LTI5|SCL11_ARATH Scarecrow-like protein 11 OS=Arabidopsis thaliana GN=SCL11 PE=2 SV=1//0
	BnaC09g40420D	6.94812	7.91168	9.71536	10.6503	UP	FALSE	FALSE	UP	RGL3; DELLA protein RGL3; K14494 DELLA protein	sp|Q9LF53|RGL3_ARATH DELLA protein RGL3 OS=Arabidopsis thaliana GN=RGL3 PE=1 SV=1//0
	BnaCnng18770D	5.35489	4.66102	66.7328	53.2787	UP	FALSE	FALSE	UP	SCL13; protein scarecrow-like 13	sp|Q9M0M5|SCL13_ARATH Scarecrow-like protein 13 OS=Arabidopsis thaliana GN=SCL13 PE=2 SV=2//0
	BnaCnng43970D	8.37582	7.33565	14.6557	10.0209	UP	DOWN	FALSE	UP	GRAS family transcription factor	sp|Q9FHZ1|SCL23_ARATH Scarecrow-like protein 23 OS=Arabidopsis thaliana GN=SCL23 PE=1 SV=1//7.19151e-151
	BnaCnng58110D	3.08081	3.57619	7.42175	6.82826	UP	FALSE	FALSE	UP	SCL1; scarecrow-like protein 1	sp|Q9SDQ3|SCL1_ARATH Scarecrow-like protein 1 OS=Arabidopsis thaliana GN=SCL1 PE=2 SV=1//0
	BnaCnng71600D	2.36984	2.55866	4.42989	4.62926	UP	FALSE	FALSE	UP	SCL5; scarecrow-like protein 5	sp|Q8H125|SCL5_ARATH Scarecrow-like protein 5 OS=Arabidopsis thaliana GN=SCL5 PE=2 SV=1//1.9671e-13
GRF(6)	BnaA01g00300D	1.71594	5.25149	0.0777532	0.0824834	DOWN	FALSE	UP	DOWN	GRF2; growth-regulating factor 2	sp|Q8L8A8|GRF2_ARATH Growth-regulating factor 2 OS=Arabidopsis thaliana GN=GRF2 PE=1 SV=1//6.49927e-158
	BnaA02g10150D	1.53989	3.03582	5.35159	11.4067	UP	UP	FALSE	UP	GRF7; growth-regulating factor 7	sp|Q9FJB8|GRF7_ARATH Growth-regulating factor 7 OS=Arabidopsis thaliana GN=GRF7 PE=2 SV=1//4.32718e-147
	BnaA03g16700D	1.31094	1.78659	0.0795363	0.449253	DOWN	FALSE	FALSE	DOWN	GRF3; growth-regulating factor 3	sp|Q9SJR5|GRF3_ARATH Growth-regulating factor 3 OS=Arabidopsis thaliana GN=GRF3 PE=2 SV=1//2.36351e-133
	BnaC01g01310D	4.77012	6.79214	0.0749388	0.623076	DOWN	UP	FALSE	DOWN	GRF2; growth-regulating factor 2	sp|Q8L8A8|GRF2_ARATH Growth-regulating factor 2 OS=Arabidopsis thaliana GN=GRF2 PE=1 SV=1//7.19799e-162
	BnaC07g46760D	7.87719	10.3417	0.263678	0.931849	DOWN	UP	FALSE	DOWN	GRF2; growth-regulating factor 2	sp|Q8L8A8|GRF2_ARATH Growth-regulating factor 2 OS=Arabidopsis thaliana GN=GRF2 PE=1 SV=1//0
	BnaCnng28460D	1.06886	1.15052	0.0285452	0.149844	DOWN	FALSE	FALSE	DOWN	GRF5; growth-regulating factor 5	sp|Q8L8A6|GRF5_ARATH Growth-regulating factor 5 OS=Arabidopsis thaliana GN=GRF5 PE=1 SV=1//1.6418e-165
HB(52)	BnaA01g00050D	11.5859	29.2944	3.36239	10.3433	DOWN	UP	UP	DOWN	HB16; homeobox-leucine zipper protein ATHB-16; K09338 homeobox-leucine zipper protein	sp|Q940J1|ATB16_ARATH Homeobox-leucine zipper protein ATHB-16 OS=Arabidopsis thaliana GN=ATHB-16 PE=2 SV=2//3.45088e-165
	BnaA01g01910D	1.15228	3.05876	28.4303	51.1917	UP	UP	UP	UP	WOX13; WUSCHEL-related homeobox 13	sp|O81788|WOX13_ARATH WUSCHEL-related homeobox 13 OS=Arabidopsis thaliana GN=WOX13 PE=2 SV=1//2.15063e-115
	BnaA01g03890D	4.78291	6.40691	0.170394	0.386388	DOWN	FALSE	FALSE	DOWN	ATH1; homeobox protein ATH1	sp|P48731|ATH1_ARATH Homeobox protein ATH1 OS=Arabidopsis thaliana GN=ATH1 PE=1 SV=1//0
	BnaA03g16450D	4.31308	3.73521	9.45307	6.97636	UP	DOWN	FALSE	UP	BLH1; BEL1-like homeodomain 1	sp|Q9SJ56|BLH1_ARATH BEL1-like homeodomain protein 1 OS=Arabidopsis thaliana GN=BLH1 PE=1 SV=1//0
	BnaA03g51900D	5.657	6.11067	8.57772	8.47332	UP	FALSE	FALSE	UP	KNAT5; homeobox protein knotted-1-like 5	sp|P48002|KNAT5_ARATH Homeobox protein knotted-1-like 5 OS=Arabidopsis thaliana GN=KNAT5 PE=1 SV=2//0
	BnaA03g53400D	2.32712	2.99289	4.57499	3.89804	UP	FALSE	FALSE	UP	WOX13; WUSCHEL-related homeobox 13	sp|O81788|WOX13_ARATH WUSCHEL-related homeobox 13 OS=Arabidopsis thaliana GN=WOX13 PE=2 SV=1//2.14695e-119
	BnaA04g00500D	5.8541	5.02571	79.0015	45.5591	UP	DOWN	FALSE	UP	HB-12; homeobox-leucine zipper protein ATHB-12; K09338 homeobox-leucine zipper protein	sp|Q9M276|ATB12_ARATH Homeobox-leucine zipper protein ATHB-12 OS=Arabidopsis thaliana GN=ATHB-12 PE=2 SV=1//5.96648e-111
	BnaA04g20970D	6.20655	6.19322	14.1312	11.08	UP	FALSE	FALSE	UP	BLH1; BEL1-like homeodomain 1	sp|Q9SJ56|BLH1_ARATH BEL1-like homeodomain protein 1 OS=Arabidopsis thaliana GN=BLH1 PE=1 SV=1//0
	BnaA05g01190D	8.78497	9.19864	103.489	58.3728	UP	DOWN	FALSE	UP	HB-7; homeobox-leucine zipper protein ATHB-7	sp|P46897|ATHB7_ARATH Homeobox-leucine zipper protein ATHB-7 OS=Arabidopsis thaliana GN=ATHB-7 PE=2 SV=2//7.47028e-116
	BnaA05g08310D	2.37386	2.69133	7.05036	5.48024	UP	FALSE	FALSE	UP	BLH1; BEL1-like homeodomain 1	sp|Q9SJ56|BLH1_ARATH BEL1-like homeodomain protein 1 OS=Arabidopsis thaliana GN=BLH1 PE=1 SV=1//0
	BnaA05g33840D	21.3459	23.5404	85.7481	48.39	UP	DOWN	FALSE	UP	HB-1; homeobox-leucine zipper protein HAT5; K09338 homeobox-leucine zipper protein	sp|Q02283|HAT5_ARATH Homeobox-leucine zipper protein HAT5 OS=Arabidopsis thaliana GN=HAT5 PE=1 SV=1//1.1499e-118
	BnaA06g40090D	5.33299	5.59065	10.1142	11.054	UP	FALSE	FALSE	UP	HAT2; homeobox-leucine zipper protein HAT2; K09338 homeobox-leucine zipper protein	sp|P46601|HAT2_ARATH Homeobox-leucine zipper protein HAT2 OS=Arabidopsis thaliana GN=HAT2 PE=1 SV=2//1.38977e-133
	BnaA07g14910D	0.663284	0.624239	0.420932	1.36637	UP	FALSE	FALSE	FALSE	HB-1; homeobox-leucine zipper protein HAT5; K09338 homeobox-leucine zipper protein	sp|Q02283|HAT5_ARATH Homeobox-leucine zipper protein HAT5 OS=Arabidopsis thaliana GN=HAT5 PE=1 SV=1//1.28955e-39
	BnaA07g24100D	3.78246	3.3946	0.0694554	0.21579	DOWN	FALSE	FALSE	DOWN	ATHB13; homeobox-leucine zipper protein ATHB-13; K09338 homeobox-leucine zipper protein	sp|Q8LC03|ATB13_ARATH Homeobox-leucine zipper protein ATHB-13 OS=Arabidopsis thaliana GN=ATHB-13 PE=2 SV=2//4.88626e-146
	BnaA08g08410D	0.061827	0.0770039	0.75819	2.7811	UP	UP	FALSE	UP	HDG4; homeobox-leucine zipper protein HDG4; K09338 homeobox-leucine zipper protein	sp|Q8L7H4|HDG4_ARATH Homeobox-leucine zipper protein HDG4 OS=Arabidopsis thaliana GN=HDG4 PE=1 SV=1//0
	BnaA08g11980D	1.73093	1.52573	0.0632416	0.150151	DOWN	FALSE	FALSE	DOWN	HB-8; homeobox-leucine zipper protein ATHB-8; K09338 homeobox-leucine zipper protein	sp|Q39123|ATHB8_ARATH Homeobox-leucine zipper protein ATHB-8 OS=Arabidopsis thaliana GN=ATHB-8 PE=1 SV=1//0
	BnaA08g20030D	0.728113	1.63663	0.0230915	0.119265	DOWN	FALSE	FALSE	DOWN	AtHB23; homeobox-leucine zipper protein ATHB-23; K09338 homeobox-leucine zipper protein	sp|Q8LFD3|ATB23_ARATH Homeobox-leucine zipper protein ATHB-23 OS=Arabidopsis thaliana GN=ATHB-23 PE=2 SV=1//1.99605e-153
	BnaA09g01430D	2.50885	2.52514	6.42563	4.90113	UP	FALSE	FALSE	UP	homeodomain-like superfamily protein	-//-
	BnaA09g38470D	3.07835	4.11792	0.159243	0.585564	DOWN	FALSE	FALSE	DOWN	HAT3; homeobox-leucine zipper protein HAT3; K09338 homeobox-leucine zipper protein	sp|P46602|HAT3_ARATH Homeobox-leucine zipper protein HAT3 OS=Arabidopsis thaliana GN=HAT3 PE=2 SV=2//3.42855e-108
	BnaA09g42630D	26.8335	23.0238	30.0597	31.7961	UP	FALSE	FALSE	UP	HB6; homeobox-leucine zipper protein ATHB-6; K09338 homeobox-leucine zipper protein	sp|P46668|ATHB6_ARATH Homeobox-leucine zipper protein ATHB-6 OS=Arabidopsis thaliana GN=ATHB-6 PE=1 SV=1//6.8956e-143
	BnaA09g45470D	0.476574	1.49082	0.0843303	0.0457067	DOWN	FALSE	FALSE	FALSE	KNATM; protein KNATM	sp|O80416|KNOSC_ORYSJ Homeobox protein knotted-1-like 12 OS=Oryza sativa subsp. japonica GN=OSH15 PE=2 SV=1//3.46945e-13
	BnaA09g55520D	0.592138	0.340976	12.2713	9.40393	UP	FALSE	FALSE	UP	HB-12; homeobox-leucine zipper protein ATHB-12; K09338 homeobox-leucine zipper protein	sp|Q9M276|ATB12_ARATH Homeobox-leucine zipper protein ATHB-12 OS=Arabidopsis thaliana GN=ATHB-12 PE=2 SV=1//1.05292e-103
	BnaAnng04800D	63.3732	60.2522	1.25724	3.20485	DOWN	UP	FALSE	DOWN	HB5; homeobox-leucine zipper protein ATHB-5	sp|P46667|ATHB5_ARATH Homeobox-leucine zipper protein ATHB-5 OS=Arabidopsis thaliana GN=ATHB-5 PE=1 SV=1//1.00703e-163
	BnaAnng09220D	4.31594	4.02365	10.5827	8.68137	UP	FALSE	FALSE	UP	BLH3; BEL1-like homeodomain 3	sp|Q9FWS9|BLH3_ARATH BEL1-like homeodomain protein 3 OS=Arabidopsis thaliana GN=BLH3 PE=1 SV=1//0
	BnaAnng30670D	2.94878	2.4206	0.141121	0.327983	DOWN	FALSE	FALSE	DOWN	HB-8; homeobox-leucine zipper protein ATHB-8; K09338 homeobox-leucine zipper protein	sp|Q39123|ATHB8_ARATH Homeobox-leucine zipper protein ATHB-8 OS=Arabidopsis thaliana GN=ATHB-8 PE=1 SV=1//0
	BnaC01g01230D	2.94249	2.22554	3.19389	2.97599	UP	FALSE	FALSE	UP	HAT22; homeobox-leucine zipper protein HAT22; K09338 homeobox-leucine zipper protein	sp|P46604|HAT22_ARATH Homeobox-leucine zipper protein HAT22 OS=Arabidopsis thaliana GN=HAT22 PE=1 SV=1//1.89972e-137
	BnaC01g05260D	0.765289	1.6973	0.0120792	0.0768629	DOWN	FALSE	FALSE	DOWN	ATH1; homeobox protein ATH1	sp|P48731|ATH1_ARATH Homeobox protein ATH1 OS=Arabidopsis thaliana GN=ATH1 PE=1 SV=1//0
	BnaC01g06410D	7.37329	7.25937	12.5565	12.3541	UP	FALSE	FALSE	UP	KNAT5; homeobox protein knotted-1-like 5	sp|P48002|KNAT5_ARATH Homeobox protein knotted-1-like 5 OS=Arabidopsis thaliana GN=KNAT5 PE=1 SV=2//0
	BnaC02g19900D	0.314674	0.660785	0.477101	1.00072	UP	FALSE	FALSE	FALSE	KNAT2; homeobox protein knotted-1-like 2	sp|P46640|KNAT2_ARATH Homeobox protein knotted-1-like 2 OS=Arabidopsis thaliana GN=KNAT2 PE=1 SV=3//2.58762e-163
	BnaC02g43700D	54.148	54.8239	1.7221	4.51064	DOWN	UP	FALSE	DOWN	HB5; homeobox-leucine zipper protein ATHB-5	sp|P46667|ATHB5_ARATH Homeobox-leucine zipper protein ATHB-5 OS=Arabidopsis thaliana GN=ATHB-5 PE=1 SV=1//7.95596e-156
	BnaC03g19820D	1.19659	1.20584	10.4038	7.55947	UP	DOWN	FALSE	UP	BLH1; BEL1-like homeodomain 1	sp|Q9SJ56|BLH1_ARATH BEL1-like homeodomain protein 1 OS=Arabidopsis thaliana GN=BLH1 PE=1 SV=1//0
	BnaC03g58690D	1.93857	2.06422	2.90278	2.74193	UP	FALSE	FALSE	UP	HB-1; homeobox-1	sp|O15266|SHOX_HUMAN Short stature homeobox protein OS=Homo sapiens GN=SHOX PE=1 SV=1//1.75109e-07
	BnaC04g00750D	9.23598	9.17207	99.5666	57.0652	UP	DOWN	FALSE	UP	HB-7; homeobox-leucine zipper protein ATHB-7	sp|P46897|ATHB7_ARATH Homeobox-leucine zipper protein ATHB-7 OS=Arabidopsis thaliana GN=ATHB-7 PE=2 SV=2//8.34833e-120
	BnaC04g09330D	4.08404	2.8775	12.522	10.9659	UP	FALSE	FALSE	UP	BLH1; BEL1-like homeodomain 1	sp|Q9SJ56|BLH1_ARATH BEL1-like homeodomain protein 1 OS=Arabidopsis thaliana GN=BLH1 PE=1 SV=1//0
	BnaC04g44970D	12.0785	11.7613	55.8591	42.9401	UP	DOWN	FALSE	UP	BLH1; BEL1-like homeodomain 1	sp|Q9SJ56|BLH1_ARATH BEL1-like homeodomain protein 1 OS=Arabidopsis thaliana GN=BLH1 PE=1 SV=1//0
	BnaC04g50970D	2.25366	2.4015	24.7718	16.4905	UP	FALSE	FALSE	UP	HB-7; homeobox-leucine zipper protein ATHB-7	sp|P46897|ATHB7_ARATH Homeobox-leucine zipper protein ATHB-7 OS=Arabidopsis thaliana GN=ATHB-7 PE=2 SV=2//3.72519e-107
	BnaC04g56300D	11.9447	12.1499	20.6939	15.3043	UP	DOWN	FALSE	UP	BLH4; BEL1-like homeodomain 4	sp|Q94KL5|BLH4_ARATH BEL1-like homeodomain protein 4 OS=Arabidopsis thaliana GN=BLH4 PE=1 SV=2//0
	BnaC05g15280D	5.02601	4.59592	12.4407	11.7767	UP	FALSE	FALSE	UP	BEL10; BEL1-like homeodomain 10	sp|Q9FXG8|BLH10_ARATH BEL1-like homeodomain protein 10 OS=Arabidopsis thaliana GN=BLH10 PE=1 SV=1//0
	BnaC05g48840D	0.598627	0.715745	4.26913	2.04945	UP	DOWN	FALSE	UP	HB-1; homeobox-leucine zipper protein HAT5; K09338 homeobox-leucine zipper protein	sp|Q02283|HAT5_ARATH Homeobox-leucine zipper protein HAT5 OS=Arabidopsis thaliana GN=HAT5 PE=1 SV=1//9.94021e-117
	BnaC06g12880D	1.22961	1.37903	5.33375	10.9715	UP	UP	FALSE	UP	HB-1; homeobox-leucine zipper protein HAT5; K09338 homeobox-leucine zipper protein	sp|Q02283|HAT5_ARATH Homeobox-leucine zipper protein HAT5 OS=Arabidopsis thaliana GN=HAT5 PE=1 SV=1//9.89715e-40
	BnaC07g16610D	1.05392	0.829995	1.99681	1.48627	FALSE	FALSE	FALSE	UP	HB53; homeobox-leucine zipper protein ATHB-53	sp|Q9LVR0|ATB53_ARATH Homeobox-leucine zipper protein ATHB-53 OS=Arabidopsis thaliana GN=ATHB-53 PE=2 SV=1//2.80886e-108
	BnaC07g20160D	7.40224	7.74546	17.3452	21.2038	UP	FALSE	FALSE	UP	HAT2; homeobox-leucine zipper protein HAT2; K09338 homeobox-leucine zipper protein	sp|P46601|HAT2_ARATH Homeobox-leucine zipper protein HAT2 OS=Arabidopsis thaliana GN=HAT2 PE=1 SV=2//1.33354e-129
	BnaC07g29530D	37.4068	36.7213	98.5973	70.1839	UP	DOWN	FALSE	UP	KNAT3; homeobox protein knotted-1-like 3	sp|P48000|KNAT3_ARATH Homeobox protein knotted-1-like 3 OS=Arabidopsis thaliana GN=KNAT3 PE=1 SV=1//0
	BnaC07g43650D	8.75009	9.22017	17.3626	14.8223	UP	FALSE	FALSE	UP	KNAT5; homeobox protein knotted-1-like 5	sp|P48002|KNAT5_ARATH Homeobox protein knotted-1-like 5 OS=Arabidopsis thaliana GN=KNAT5 PE=1 SV=2//0
	BnaC08g10960D	0.190086	0.159453	1.80517	3.70857	UP	UP	FALSE	UP	HDG4; homeobox-leucine zipper protein HDG4; K09338 homeobox-leucine zipper protein	sp|Q8L7H4|HDG4_ARATH Homeobox-leucine zipper protein HDG4 OS=Arabidopsis thaliana GN=HDG4 PE=1 SV=1//0
	BnaC08g30600D	4.52603	6.39495	0.456058	1.09726	DOWN	FALSE	FALSE	DOWN	HAT3; homeobox-leucine zipper protein HAT3; K09338 homeobox-leucine zipper protein	sp|P46602|HAT3_ARATH Homeobox-leucine zipper protein HAT3 OS=Arabidopsis thaliana GN=HAT3 PE=2 SV=2//2.42849e-111
	BnaC08g31770D	5.0603	5.02186	96.8379	74.1715	UP	DOWN	FALSE	UP	HB-12; homeobox-leucine zipper protein ATHB-12; K09338 homeobox-leucine zipper protein	sp|Q9M276|ATB12_ARATH Homeobox-leucine zipper protein ATHB-12 OS=Arabidopsis thaliana GN=ATHB-12 PE=2 SV=1//3.01798e-109
	BnaC08g48560D	1.49055	2.35863	0.0437693	0.301127	DOWN	FALSE	FALSE	DOWN	AtHB23; homeobox-leucine zipper protein ATHB-23; K09338 homeobox-leucine zipper protein	sp|Q8LFD3|ATB23_ARATH Homeobox-leucine zipper protein ATHB-23 OS=Arabidopsis thaliana GN=ATHB-23 PE=2 SV=1//2.68935e-152
	BnaCnng51630D	4.35028	4.04118	0.0782129	0.196746	DOWN	FALSE	FALSE	DOWN	ATML1; homeobox-leucine zipper protein MERISTEM L1	sp|Q8RWU4|ATML1_ARATH Homeobox-leucine zipper protein MERISTEM L1 OS=Arabidopsis thaliana GN=ATML1 PE=2 SV=1//0
	BnaCnng67720D	7.48077	7.81007	0.154472	0.608215	DOWN	FALSE	FALSE	DOWN	HB-3; homeobox-leucine zipper protein HAT7; K09338 homeobox-leucine zipper protein	sp|Q00466|HAT7_ARATH Homeobox-leucine zipper protein HAT7 OS=Arabidopsis thaliana GN=HAT7 PE=2 SV=4//1.40741e-127
	BnaCnng70120D	2.4153	3.0944	0.153637	0.4953	DOWN	FALSE	FALSE	DOWN	ATHB13; homeobox-leucine zipper protein ATHB-13; K09338 homeobox-leucine zipper protein	sp|Q8LC03|ATB13_ARATH Homeobox-leucine zipper protein ATHB-13 OS=Arabidopsis thaliana GN=ATHB-13 PE=2 SV=2//7.17898e-161
	BnaCnng73330D	10.3484	7.36665	77.1006	39.6777	UP	DOWN	FALSE	UP	HB-12; homeobox-leucine zipper protein ATHB-12; K09338 homeobox-leucine zipper protein	sp|Q9M276|ATB12_ARATH Homeobox-leucine zipper protein ATHB-12 OS=Arabidopsis thaliana GN=ATHB-12 PE=2 SV=1//7.15891e-112
HMG(11)	BnaA01g01900D	4.04857	11.8193	9.52262	23.6565	UP	UP	UP	UP	HMGB4; high mobility group B4 protein	sp|Q42344|HMGB4_ARATH High mobility group B protein 4 OS=Arabidopsis thaliana GN=HMGB4 PE=1 SV=1//1.97866e-27
	BnaA02g32890D	8.53887	10.251	0.263556	0.84863	DOWN	FALSE	FALSE	DOWN	HMGB6; high-mobility group B6 protein	sp|Q8LDF9|HMGB7_ARATH High mobility group B protein 7 OS=Arabidopsis thaliana GN=HMGB7 PE=1 SV=1//1.77222e-59
	BnaA03g53430D	21.9364	22.6643	411.62	461.156	UP	FALSE	FALSE	UP	HMGB4; high mobility group B4 protein	sp|Q42344|HMGB4_ARATH High mobility group B protein 4 OS=Arabidopsis thaliana GN=HMGB4 PE=1 SV=1//3.11714e-27
	BnaA06g14580D	88.7224	77.6774	174.533	160.953	UP	FALSE	FALSE	UP	HMGB3; high mobility group B3 protein	sp|P93047|HMGB3_ARATH High mobility group B protein 3 OS=Arabidopsis thaliana GN=HMGB3 PE=1 SV=1//4.64117e-53
	BnaA07g02740D	9.33858	11.1735	12.0166	15.3126	UP	FALSE	FALSE	UP	HMGB4; high mobility group B4 protein	sp|Q42344|HMGB4_ARATH High mobility group B protein 4 OS=Arabidopsis thaliana GN=HMGB4 PE=1 SV=1//4.69932e-44
	BnaC01g15630D	16.5061	21.682	1.80984	4.5175	DOWN	UP	FALSE	DOWN	HMG (high mobility group) box protein; K09273 upstream-binding transcription factor	sp|Q9SUP7|HMGB6_ARATH High mobility group B protein 6 OS=Arabidopsis thaliana GN=HMGB6 PE=2 SV=1//2.19375e-178
	BnaC02g41640D	19.7791	22.2211	1.01461	3.91398	DOWN	UP	FALSE	DOWN	HMGB6; high-mobility group B6 protein	sp|Q8LDF9|HMGB7_ARATH High mobility group B protein 7 OS=Arabidopsis thaliana GN=HMGB7 PE=1 SV=1//4.31073e-61
	BnaC07g15210D	33.2668	32.325	45.7288	44.3425	UP	FALSE	FALSE	UP	HMGB3; high mobility group B3 protein	sp|P93047|HMGB3_ARATH High mobility group B protein 3 OS=Arabidopsis thaliana GN=HMGB3 PE=1 SV=1//4.99065e-54
	BnaC07g45700D	28.8122	26.0808	337.811	389.842	UP	FALSE	FALSE	UP	HMGB4; high mobility group B4 protein	sp|Q42344|HMGB4_ARATH High mobility group B protein 4 OS=Arabidopsis thaliana GN=HMGB4 PE=1 SV=1//3.17771e-28
	BnaCnng43910D	7.959	8.55376	20.9844	21.9663	UP	FALSE	FALSE	UP	HMGB4; high mobility group B4 protein	sp|Q42344|HMGB4_ARATH High mobility group B protein 4 OS=Arabidopsis thaliana GN=HMGB4 PE=1 SV=1//2.69453e-41
	BnaCnng49050D	176.067	161.909	322.746	293.277	UP	FALSE	FALSE	UP	HMGB3; high mobility group B3 protein	sp|P93047|HMGB3_ARATH High mobility group B protein 3 OS=Arabidopsis thaliana GN=HMGB3 PE=1 SV=1//7.03604e-41
HSF(38)	BnaA01g08640D	3.54152	2.7132	8.61199	7.02317	UP	FALSE	FALSE	UP	HSF1; heat stress transcription factor A-1a; K09419 heat shock transcription factor, other eukaryote	sp|P41151|HFA1A_ARATH Heat stress transcription factor A-1a OS=Arabidopsis thaliana GN=HSFA1A PE=1 SV=2//0
	BnaA01g09690D	0.0412071	0.0319581	2.85091	4.99066	UP	FALSE	FALSE	UP	HSF_A4A; heat stress transcription factor A-4a; K09419 heat shock transcription factor, other eukaryote	sp|O49403|HFA4A_ARATH Heat stress transcription factor A-4a OS=Arabidopsis thaliana GN=HSFA4A PE=2 SV=1//0
	BnaA02g22350D	0.0881633	0.0213432	1.74051	0.712218	UP	DOWN	FALSE	UP	HSFA6A; heat stress transcription factor A-6a; K09419 heat shock transcription factor, other eukaryote	sp|Q1PDN3|HFA6A_ARATH Heat stress transcription factor A-6a OS=Arabidopsis thaliana GN=HSFA6A PE=2 SV=1//2.34448e-129
	BnaA03g22890D	0.146998	0.325008	2.54116	4.37336	UP	FALSE	FALSE	UP	HSFA2; heat stress transcription factor A-2; K09419 heat shock transcription factor, other eukaryote	sp|O80982|HSFA2_ARATH Heat stress transcription factor A-2 OS=Arabidopsis thaliana GN=HSFA2 PE=1 SV=1//0
	BnaA03g24840D	2.4572	2.97047	12.9217	12.3453	UP	FALSE	FALSE	UP	AT-HSFB2B; heat stress transcription factor B-2b; K09419 heat shock transcription factor, other eukaryote	sp|Q9T0D3|HFB2B_ARATH Heat stress transcription factor B-2b OS=Arabidopsis thaliana GN=HSFB2B PE=2 SV=1//1.97744e-120
	BnaA03g37460D	0.653771	0.602251	8.21834	4.59926	UP	DOWN	FALSE	UP	HSFC1; heat stress transcription factor C-1; K09419 heat shock transcription factor, other eukaryote	sp|Q9LV52|HSFC1_ARATH Heat stress transcription factor C-1 OS=Arabidopsis thaliana GN=HSFC1 PE=2 SV=1//2.22507e-123
	BnaA03g41540D	0.14612	0.1135	0.289648	1.21525	UP	UP	FALSE	FALSE	HSFA7A; heat stress transcription factor A-7a; K09419 heat shock transcription factor, other eukaryote	sp|Q9SV12|HFA7A_ARATH Heat stress transcription factor A-7a OS=Arabidopsis thaliana GN=HSFA7A PE=2 SV=1//4.49628e-134
	BnaA03g53750D	14.0349	11.9459	177.058	165.449	UP	FALSE	FALSE	UP	HSF4; heat stress transcription factor B-1; K09419 heat shock transcription factor, other eukaryote	sp|Q96320|HSFB1_ARATH Heat stress transcription factor B-1 OS=Arabidopsis thaliana GN=HSFB1 PE=2 SV=2//2.8189e-114
	BnaA04g23250D	15.0008	17.6782	29.4487	29.0007	UP	FALSE	FALSE	UP	E2F/DP family winged-helix DNA-binding domain-containing protein	sp|Q84T61|HSFA1_ORYSJ Heat stress transcription factor A-1 OS=Oryza sativa subsp. japonica GN=HSFA1 PE=2 SV=1//1.33558e-15
	BnaA06g21470D	2.92797	2.63335	158.548	154.164	UP	FALSE	FALSE	UP	HSFB2A; heat stress transcription factor B-2a; K09419 heat shock transcription factor, other eukaryote	sp|Q9SCW4|HFB2A_ARATH Heat stress transcription factor B-2a OS=Arabidopsis thaliana GN=HSFB2A PE=2 SV=1//1.79303e-122
	BnaA07g26740D	2.98982	2.45262	10.8269	8.5092	UP	FALSE	FALSE	UP	HSFA8; heat stress transcription factor A-8; K09419 heat shock transcription factor, other eukaryote	sp|Q9S7U5|HSFA8_ARATH Heat stress transcription factor A-8 OS=Arabidopsis thaliana GN=HSFA8 PE=2 SV=1//1.91939e-170
	BnaA08g08940D	0.844223	0.802321	2.39227	3.09424	UP	FALSE	FALSE	UP	HSF_A4A; heat stress transcription factor A-4a; K09419 heat shock transcription factor, other eukaryote	sp|O49403|HFA4A_ARATH Heat stress transcription factor A-4a OS=Arabidopsis thaliana GN=HSFA4A PE=2 SV=1//1.86511e-161
	BnaA09g17760D	2.91215	3.85196	8.87862	8.96992	UP	FALSE	FALSE	UP	RHA1; heat stress transcription factor A-4c; K09419 heat shock transcription factor, other eukaryote	sp|Q9FK72|HFA4C_ARATH Heat stress transcription factor A-4c OS=Arabidopsis thaliana GN=HSFA4C PE=2 SV=1//1.40425e-162
	BnaA09g21510D	2.44601	2.35887	5.48928	6.33449	UP	FALSE	FALSE	UP	AT-HSFB2B; heat stress transcription factor B-2b; K09419 heat shock transcription factor, other eukaryote	sp|Q9T0D3|HFB2B_ARATH Heat stress transcription factor B-2b OS=Arabidopsis thaliana GN=HSFB2B PE=2 SV=1//1.16205e-131
	BnaA09g40360D	0.0182605	0.0584073	0.364993	1.86016	UP	UP	FALSE	UP	AT-HSFA7B; heat stress transcription factor A-7b; K09419 heat shock transcription factor, other eukaryote	sp|Q9M1V5|HFA7B_ARATH Heat stress transcription factor A-7b OS=Arabidopsis thaliana GN=HSFA7B PE=2 SV=1//4.55866e-137
	BnaA10g26390D	3.83757	4.0353	18.4024	22.6983	UP	FALSE	FALSE	UP	HSFA3; heat shock transcription factor A3; K09419 heat shock transcription factor, other eukaryote	sp|Q8GYY1|HSFA3_ARATH Heat stress transcription factor A-3 OS=Arabidopsis thaliana GN=HSFA3 PE=2 SV=2//0
	BnaAnng31620D	1.11703	1.29157	80.1551	103.848	UP	FALSE	FALSE	UP	HSF_A4A; heat stress transcription factor A-4a; K09419 heat shock transcription factor, other eukaryote	sp|O49403|HFA4A_ARATH Heat stress transcription factor A-4a OS=Arabidopsis thaliana GN=HSFA4A PE=2 SV=1//0
	BnaAnng36200D	2.63106	5.25397	81.9086	127.558	UP	UP	FALSE	UP	HSF4; heat stress transcription factor B-1; K09419 heat shock transcription factor, other eukaryote	sp|Q96320|HSFB1_ARATH Heat stress transcription factor B-1 OS=Arabidopsis thaliana GN=HSFB1 PE=2 SV=2//1.49225e-116
	BnaC01g01790D	7.52195	6.97338	428.962	289.842	UP	DOWN	FALSE	UP	HSF4; heat stress transcription factor B-1; K09419 heat shock transcription factor, other eukaryote	sp|Q96320|HSFB1_ARATH Heat stress transcription factor B-1 OS=Arabidopsis thaliana GN=HSFB1 PE=2 SV=2//5.96435e-118
	BnaC01g11370D	0.0135649	0.0295498	6.5536	11.2543	UP	FALSE	FALSE	UP	HSF_A4A; heat stress transcription factor A-4a; K09419 heat shock transcription factor, other eukaryote	sp|O49403|HFA4A_ARATH Heat stress transcription factor A-4a OS=Arabidopsis thaliana GN=HSFA4A PE=2 SV=1//0
	BnaC02g17710D	6.10614	5.1998	16.1641	14.0577	UP	FALSE	FALSE	UP	HSFA8; heat stress transcription factor A-8; K09419 heat shock transcription factor, other eukaryote	sp|Q9S7U5|HSFA8_ARATH Heat stress transcription factor A-8 OS=Arabidopsis thaliana GN=HSFA8 PE=2 SV=1//2.12869e-163
	BnaC03g26940D	0.718209	1.08954	8.82364	9.37775	UP	FALSE	FALSE	UP	HSFA2; heat stress transcription factor A-2; K09419 heat shock transcription factor, other eukaryote	sp|O80982|HSFA2_ARATH Heat stress transcription factor A-2 OS=Arabidopsis thaliana GN=HSFA2 PE=1 SV=1//0
	BnaC03g43990D	2.81615	2.44453	4.74199	4.04891	UP	FALSE	FALSE	UP	HSFC1; heat stress transcription factor C-1; K09419 heat shock transcription factor, other eukaryote	sp|Q9LV52|HSFC1_ARATH Heat stress transcription factor C-1 OS=Arabidopsis thaliana GN=HSFC1 PE=2 SV=1//9.17884e-124
	BnaC03g52080D	5.39247	3.60363	112.687	106.732	UP	FALSE	FALSE	UP	HSFB2A; heat stress transcription factor B-2a; K09419 heat shock transcription factor, other eukaryote	sp|Q9SCW4|HFB2A_ARATH Heat stress transcription factor B-2a OS=Arabidopsis thaliana GN=HSFB2A PE=2 SV=1//1.81434e-119
	BnaC03g62890D	0.160345	0.13644	5.46688	6.76836	UP	FALSE	FALSE	UP	HSF_A4A; heat stress transcription factor A-4a; K09419 heat shock transcription factor, other eukaryote	sp|O49403|HFA4A_ARATH Heat stress transcription factor A-4a OS=Arabidopsis thaliana GN=HSFA4A PE=2 SV=1//2.76542e-177
	BnaC03g73070D	2.80049	2.11181	5.63325	6.92582	UP	FALSE	FALSE	UP	HSFB2A; heat stress transcription factor B-2a; K09419 heat shock transcription factor, other eukaryote	sp|Q9SCW4|HFB2A_ARATH Heat stress transcription factor B-2a OS=Arabidopsis thaliana GN=HSFB2A PE=2 SV=1//1.81615e-70
	BnaC04g28450D	0.144364	0.335101	2.69276	3.5033	UP	FALSE	FALSE	UP	HSFA7A; heat stress transcription factor A-7a; K09419 heat shock transcription factor, other eukaryote	sp|Q9SV12|HFA7A_ARATH Heat stress transcription factor A-7a OS=Arabidopsis thaliana GN=HSFA7A PE=2 SV=1//4.80827e-147
	BnaC04g29180D	4.22746	4.47533	12.0923	11.1912	UP	FALSE	FALSE	UP	AT-HSFA5; heat stress transcription factor A-5; K09419 heat shock transcription factor, other eukaryote	sp|Q94BZ5|HSFA5_ARATH Heat stress transcription factor A-5 OS=Arabidopsis thaliana GN=HSFA5 PE=2 SV=1//0
	BnaC04g34020D	1.05924	1.22768	1.51914	1.7451	UP	FALSE	FALSE	UP	aminopeptidase family protein; K01255 leucyl aminopeptidase [EC:3.4.11.1]	sp|P30184|AMPL1_ARATH Leucine aminopeptidase 1 OS=Arabidopsis thaliana GN=PM25 PE=1 SV=1//4.10491e-145
	BnaC06g29140D	3.01706	2.37768	3.30915	2.96784	UP	FALSE	FALSE	UP	HSFA8; heat stress transcription factor A-8; K09419 heat shock transcription factor, other eukaryote	sp|Q9S7U5|HSFA8_ARATH Heat stress transcription factor A-8 OS=Arabidopsis thaliana GN=HSFA8 PE=2 SV=1//4.66931e-167
	BnaC07g35520D	0.987508	1.2603	31.5351	38.9953	UP	FALSE	FALSE	UP	HSF_A4A; heat stress transcription factor A-4a; K09419 heat shock transcription factor, other eukaryote	sp|O49403|HFA4A_ARATH Heat stress transcription factor A-4a OS=Arabidopsis thaliana GN=HSFA4A PE=2 SV=1//0
	BnaC08g32790D	0.0563734	0.136966	1.6844	4.57077	UP	UP	FALSE	UP	AT-HSFA7B; heat stress transcription factor A-7b; K09419 heat shock transcription factor, other eukaryote	sp|Q9M1V5|HFA7B_ARATH Heat stress transcription factor A-7b OS=Arabidopsis thaliana GN=HSFA7B PE=2 SV=1//6.11035e-136
	BnaC09g18620D	5.26886	5.48907	14.2641	14.1796	UP	FALSE	FALSE	UP	RHA1; heat stress transcription factor A-4c; K09419 heat shock transcription factor, other eukaryote	sp|Q9FK72|HFA4C_ARATH Heat stress transcription factor A-4c OS=Arabidopsis thaliana GN=HSFA4C PE=2 SV=1//6.17326e-176
	BnaC09g52680D	5.50914	5.1973	8.98465	9.77811	UP	FALSE	FALSE	UP	AT-HSFB2B; heat stress transcription factor B-2b; K09419 heat shock transcription factor, other eukaryote	sp|Q9T0D3|HFB2B_ARATH Heat stress transcription factor B-2b OS=Arabidopsis thaliana GN=HSFB2B PE=2 SV=1//2.93915e-137
	BnaCnng02620D	8.20831	7.72074	27.4801	39.0522	UP	FALSE	FALSE	UP	HSFA3; heat shock transcription factor A3; K09419 heat shock transcription factor, other eukaryote	sp|Q8GYY1|HSFA3_ARATH Heat stress transcription factor A-3 OS=Arabidopsis thaliana GN=HSFA3 PE=2 SV=2//0
	BnaCnng36910D	2.57121	2.81255	8.40552	6.63421	UP	FALSE	FALSE	UP	HSF1; heat stress transcription factor A-1a; K09419 heat shock transcription factor, other eukaryote	sp|P41151|HFA1A_ARATH Heat stress transcription factor A-1a OS=Arabidopsis thaliana GN=HSFA1A PE=1 SV=2//0
	BnaCnng54110D	0.172417	0.399538	8.4244	12.0635	UP	FALSE	FALSE	UP	HSFB2A; heat stress transcription factor B-2a; K09419 heat shock transcription factor, other eukaryote	sp|Q9SCW4|HFB2A_ARATH Heat stress transcription factor B-2a OS=Arabidopsis thaliana GN=HSFB2A PE=2 SV=1//2.40287e-94
	BnaCnng56320D	5.16492	4.26687	17.0112	14.5059	UP	FALSE	FALSE	UP	HSF4; heat stress transcription factor B-1; K09419 heat shock transcription factor, other eukaryote	sp|Q96320|HSFB1_ARATH Heat stress transcription factor B-1 OS=Arabidopsis thaliana GN=HSFB1 PE=2 SV=2//1.16821e-117
IWS1(9)	BnaA05g28100D	2.28092	2.03269	3.22966	2.78357	UP	FALSE	FALSE	UP	probable mediator of RNA polymerase II transcription subunit 26a	sp|F4J4Y5|MD26A_ARATH Probable mediator of RNA polymerase II transcription subunit 26a OS=Arabidopsis thaliana GN=MED26A PE=2 SV=1//5.82647e-173
	BnaA09g24620D	23.8666	25.4373	42.0968	37.5888	UP	FALSE	FALSE	UP	IWS1; IWS1-like protein; K17498 transcription factor SPN1	sp|Q8C1D8|IWS1_MOUSE Protein IWS1 homolog OS=Mus musculus GN=Iws1 PE=1 SV=1//2.63349e-28
	BnaA10g25220D	7.21516	6.29817	41.8355	39.6138	UP	FALSE	FALSE	UP	transcription elongation factor (TFIIS) family protein	sp|Q9FHK9|MD26B_ARATH Probable mediator of RNA polymerase II transcription subunit 26b OS=Arabidopsis thaliana GN=MED26B PE=2 SV=1//0
	BnaAnng01210D	5.01681	4.93849	29.3559	36.1527	UP	FALSE	FALSE	UP	transcription elongation factor (TFIIS) family protein	sp|Q9FHK9|MD26B_ARATH Probable mediator of RNA polymerase II transcription subunit 26b OS=Arabidopsis thaliana GN=MED26B PE=2 SV=1//0
	BnaC03g03980D	0.644696	1.78124	0.535482	1.28325	FALSE	FALSE	UP	FALSE	transcription elongation factor (TFIIS) family protein	sp|F4KFC7|MD26C_ARATH Probable mediator of RNA polymerase II transcription subunit 26c OS=Arabidopsis thaliana GN=MED26C PE=1 SV=1//5.16494e-158
	BnaC04g06710D	7.54853	8.77518	19.8453	17.3639	UP	FALSE	FALSE	UP	TFIIS; transcript elongation factor IIS; K03145 transcription elongation factor S-II	sp|Q9ZVH8|RDO2_ARATH Transcription elongation factor TFIIS OS=Arabidopsis thaliana GN=TFIIS PE=1 SV=1//1.9833e-175
	BnaC05g24260D	33.578	33.7731	58.1888	50.3028	UP	FALSE	FALSE	UP	IWS1; IWS1-like protein; K17498 transcription factor SPN1	sp|Q3SWT4|IWS1_RAT Protein IWS1 homolog OS=Rattus norvegicus GN=Iws1 PE=2 SV=1//1.7416e-28
	BnaC09g46820D	6.42032	6.7786	7.96202	9.02628	UP	FALSE	FALSE	UP	transcription elongation factor (TFIIS) family protein	sp|F4KFC7|MD26C_ARATH Probable mediator of RNA polymerase II transcription subunit 26c OS=Arabidopsis thaliana GN=MED26C PE=1 SV=1//5.53028e-132
	BnaC09g50160D	11.0055	9.47356	69.6442	59.2186	UP	FALSE	FALSE	UP	transcription elongation factor (TFIIS) family protein	sp|Q9FHK9|MD26B_ARATH Probable mediator of RNA polymerase II transcription subunit 26b OS=Arabidopsis thaliana GN=MED26B PE=2 SV=1//0
Jumonji(10)	BnaA01g10590D	4.30667	4.90857	15.0879	13.6296	UP	FALSE	FALSE	UP	JMJ14; probable lysine-specific demethylase JMJ14; K11446 histone demethylase JARID1 [EC:1.14.11.-]	sp|Q8GUI6|JMJ14_ARATH Probable lysine-specific demethylase JMJ14 OS=Arabidopsis thaliana GN=JMJ14 PE=1 SV=1//0
	BnaA05g20100D	29.9913	26.4118	58.6082	33.0002	UP	DOWN	FALSE	UP	jumonji-C domain-containing protein 30; K10277 lysine-specific demethylase 8 [EC:1.14.11.27]	sp|Q8RWR1|JMJ30_ARATH Putative lysine-specific demethylase JMJD5 OS=Arabidopsis thaliana GN=JMJD5 PE=2 SV=1//0
	BnaA07g34160D	5.16431	5.75629	12.2378	11.1832	UP	FALSE	FALSE	UP	F-box protein	sp|Q9M9E8|FB92_ARATH F-box protein At1g78280 OS=Arabidopsis thaliana GN=At1g78280 PE=2 SV=3//0
	BnaAnng07270D	2.2086	1.84647	7.14969	8.28485	UP	FALSE	FALSE	UP	transcription factor jumonji (jmj) family protein / zinc finger (C5HC2 type) family protein	sp|Q336N8|JM706_ORYSJ Lysine-specific demethylase JMJ706 OS=Oryza sativa subsp. japonica GN=JMJ706 PE=2 SV=1//0
	BnaC01g12120D	3.94259	4.21759	12.9342	10.5262	UP	FALSE	FALSE	UP	JMJ14; probable lysine-specific demethylase JMJ14; K11446 histone demethylase JARID1 [EC:1.14.11.-]	sp|Q8GUI6|JMJ14_ARATH Probable lysine-specific demethylase JMJ14 OS=Arabidopsis thaliana GN=JMJ14 PE=1 SV=1//0
	BnaC03g72230D	4.18845	3.7814	0.2187	0.503347	DOWN	FALSE	FALSE	DOWN	transcription factor jumonji and C5HC2 type zinc finger domain-containing protein; K11446 histone demethylase JARID1 [EC:1.14.11.-]	sp|Q8L7T6|JMJ19_ARATH Probable inactive lysine-specific demethylase JMJ19 OS=Arabidopsis thaliana GN=JMJ19 PE=2 SV=1//0
	BnaC05g31460D	18.047	13.8446	52.5302	28.6407	UP	DOWN	FALSE	UP	jumonji-C domain-containing protein 30; K10277 lysine-specific demethylase 8 [EC:1.14.11.27]	sp|Q8RWR1|JMJ30_ARATH Putative lysine-specific demethylase JMJD5 OS=Arabidopsis thaliana GN=JMJD5 PE=2 SV=1//0
	BnaC06g38780D	4.58589	4.98596	9.73374	9.33874	UP	FALSE	FALSE	UP	F-box protein	sp|Q9M9E8|FB92_ARATH F-box protein At1g78280 OS=Arabidopsis thaliana GN=At1g78280 PE=2 SV=3//0
	BnaC07g19700D	0.915456	1.01597	2.87963	3.18579	UP	FALSE	FALSE	UP	transcription factor jumonji (jmj) family protein / zinc finger (C5HC2 type) family protein	sp|Q336N8|JM706_ORYSJ Lysine-specific demethylase JMJ706 OS=Oryza sativa subsp. japonica GN=JMJ706 PE=2 SV=1//0
	BnaC09g19820D	0.796697	0.687864	2.72487	2.70572	UP	FALSE	FALSE	UP	transcription factor jumonji (jmj) family protein / zinc finger (C5HC2 type) family protein	sp|Q336N8|JM706_ORYSJ Lysine-specific demethylase JMJ706 OS=Oryza sativa subsp. japonica GN=JMJ706 PE=2 SV=1//0
LIM(1)	BnaA08g25900D	29.4638	29.4829	38.2878	39.6697	UP	FALSE	FALSE	UP	WLIM1; transcription factor lim1	sp|Q94JX5|WLIM1_ARATH LIM domain-containing protein WLIM1 OS=Arabidopsis thaliana GN=WLIM1 PE=1 SV=1//1.87848e-130
LOB(10)	BnaA01g32900D	3.24574	0.527996	22.466	14.671	UP	DOWN	DOWN	UP	LBD41; LOB domain-containing protein 41	sp|Q9M886|LBD41_ARATH LOB domain-containing protein 41 OS=Arabidopsis thaliana GN=LBD41 PE=2 SV=1//8.69324e-32
	BnaA02g28140D	6.56223	5.25443	0.144035	0.565712	DOWN	FALSE	FALSE	DOWN	LBD24; LOB domain-containing protein 24	sp|P59468|LBD24_ARATH LOB domain-containing protein 24 OS=Arabidopsis thaliana GN=LBD24 PE=2 SV=1//9.20504e-60
	BnaA03g27980D	1.35392	0.403273	1.7443	1.38521	UP	FALSE	FALSE	FALSE	LBD41; LOB domain-containing protein 41	sp|Q9M886|LBD41_ARATH LOB domain-containing protein 41 OS=Arabidopsis thaliana GN=LBD41 PE=2 SV=1//3.92533e-136
	BnaA09g49990D	9.86424	10.2506	40.0973	39.286	UP	FALSE	FALSE	UP	AMC1; metacaspase 1	sp|Q7XJE6|MCA1_ARATH Metacaspase-1 OS=Arabidopsis thaliana GN=AMC1 PE=1 SV=1//0
	BnaAnng05130D	2.66965	3.44585	42.8338	51.6284	UP	FALSE	FALSE	UP	LBD37; LOB domain-containing protein 37	sp|Q9FN11|LBD37_ARATH LOB domain-containing protein 37 OS=Arabidopsis thaliana GN=LBD37 PE=2 SV=1//1.66708e-87
	BnaC02g37020D	2.46904	2.1425	0.26193	0.981175	FALSE	FALSE	FALSE	DOWN	LBD25; LOB domain-containing protein 25	sp|Q8L8Q3|LBD25_ARATH LOB domain-containing protein 25 OS=Arabidopsis thaliana GN=LBD25 PE=2 SV=3//3.49258e-83
	BnaC03g33010D	1.09003	0.458988	2.77494	3.7518	UP	FALSE	FALSE	UP	LBD41; LOB domain-containing protein 41	sp|Q9M886|LBD41_ARATH LOB domain-containing protein 41 OS=Arabidopsis thaliana GN=LBD41 PE=2 SV=1//4.08944e-141
	BnaC05g05560D	0.082513	0.024512	5.85881	5.42707	UP	FALSE	FALSE	UP	LBD1; LOB domain-containing protein 1	sp|Q9LQR0|LBD1_ARATH LOB domain-containing protein 1 OS=Arabidopsis thaliana GN=LBD1 PE=2 SV=1//3.20001e-85
	BnaC05g42060D	7.37423	7.812	0.378	1.11487	DOWN	FALSE	FALSE	DOWN	LBD21; LOB domain-containing protein 21	sp|Q9SRL8|LBD21_ARATH LOB domain-containing protein 21 OS=Arabidopsis thaliana GN=LBD21 PE=2 SV=1//1.73782e-88
	BnaC07g31610D	0.944646	0.778569	5.55542	5.88038	UP	FALSE	FALSE	UP	LBD38; LOB domain-containing protein 38	sp|Q9SN23|LBD38_ARATH LOB domain-containing protein 38 OS=Arabidopsis thaliana GN=LBD38 PE=2 SV=1//1.30491e-113
LUG(2)	BnaC04g43270D	1.36764	2.03341	0.146979	0.323402	DOWN	FALSE	FALSE	FALSE	LUH; WD40 repeat protein MUCILAGE-MODIFIED 1	sp|O48847|LUH_ARATH Transcriptional corepressor LEUNIG_HOMOLOG OS=Arabidopsis thaliana GN=LUH PE=1 SV=1//3.7978e-52
	BnaC07g43850D	2.30402	2.34115	0.0697574	0.148415	DOWN	FALSE	FALSE	DOWN	LUG; transcriptional corepressor LEUNIG	sp|Q9FUY2|LEUNG_ARATH Transcriptional corepressor LEUNIG OS=Arabidopsis thaliana GN=LUG PE=1 SV=2//2.13642e-54
MADS(16)	BnaA01g02900D	1.03825	1.32697	5.05158	6.25728	UP	FALSE	FALSE	UP	AGL16; Agamous-like MADS-box protein AGL16	sp|A2RVQ5|AGL16_ARATH Agamous-like MADS-box protein AGL16 OS=Arabidopsis thaliana GN=AGL16 PE=1 SV=1//1.34817e-145
	BnaA03g13630D	2.33705	2.23665	2.98522	2.84791	UP	FALSE	FALSE	UP	FLC; MADS-box protein FLOWERING LOCUS C	sp|Q9S7Q7|FLC_ARATH MADS-box protein FLOWERING LOCUS C OS=Arabidopsis thaliana GN=FLC PE=2 SV=1//1.03674e-71
	BnaA03g51000D	2.01187	1.98629	1.91993	3.27189	UP	FALSE	FALSE	FALSE	AGL16; Agamous-like MADS-box protein AGL16	sp|A2RVQ5|AGL16_ARATH Agamous-like MADS-box protein AGL16 OS=Arabidopsis thaliana GN=AGL16 PE=1 SV=1//4.89448e-145
	BnaA04g02430D	3.14487	3.98942	17.169	14.4747	UP	FALSE	FALSE	UP	AGL18; Agamous-like MADS-box protein AGL18	sp|Q9M2K8|AGL18_ARATH Agamous-like MADS-box protein AGL18 OS=Arabidopsis thaliana GN=AGL18 PE=2 SV=1//3.48764e-119
	BnaA04g06200D	0.777522	0.505657	2.8838	3.56073	UP	FALSE	FALSE	UP	MADS-box transcription factor family protein	sp|Q9C633|AGL97_ARATH Agamous-like MADS-box protein AGL97 OS=Arabidopsis thaliana GN=AGL97 PE=1 SV=1//2.85616e-30
	BnaA06g23990D	5.3123	5.35299	6.19463	6.85467	UP	FALSE	FALSE	UP	MAF1; agamous-like MADS-box protein AGL27	sp|Q9AT76|AGL27_ARATH Agamous-like MADS-box protein AGL27 OS=Arabidopsis thaliana GN=AGL27 PE=1 SV=1//9.02126e-23
	BnaA09g36710D	0.582546	0.826818	65.4703	51.9134	UP	FALSE	FALSE	UP	AGL18; Agamous-like MADS-box protein AGL18	sp|Q9M2K8|AGL18_ARATH Agamous-like MADS-box protein AGL18 OS=Arabidopsis thaliana GN=AGL18 PE=2 SV=1//1.38193e-124
	BnaA09g42480D	16.0786	15.7207	32.025	22.3983	UP	DOWN	FALSE	UP	SVP; MADS-box protein SVP	sp|Q9FVC1|SVP_ARATH MADS-box protein SVP OS=Arabidopsis thaliana GN=SVP PE=1 SV=1//1.64581e-152
	BnaC01g04170D	2.77228	3.48166	10.0214	10.2364	UP	FALSE	FALSE	UP	AGL16; Agamous-like MADS-box protein AGL16	sp|A2RVQ5|AGL16_ARATH Agamous-like MADS-box protein AGL16 OS=Arabidopsis thaliana GN=AGL16 PE=1 SV=1//2.55531e-143
	BnaC03g15810D	0.115929	0.153156	1.06261	1.02082	UP	FALSE	FALSE	UP	AGL71; MADS-box transcription factor AGL71	sp|O64645|SOC1_ARATH MADS-box protein SOC1 OS=Arabidopsis thaliana GN=SOC1 PE=1 SV=1//5.55771e-47
	BnaC04g24260D	2.54712	2.57755	41.1978	45.995	UP	FALSE	FALSE	UP	AGL18; Agamous-like MADS-box protein AGL18	sp|Q9M2K8|AGL18_ARATH Agamous-like MADS-box protein AGL18 OS=Arabidopsis thaliana GN=AGL18 PE=2 SV=1//6.59152e-112
	BnaC04g53290D	1.08804	1.18763	18.2533	11.7154	UP	DOWN	FALSE	UP	AGL20; MADS-box protein SOC1	sp|O64645|SOC1_ARATH MADS-box protein SOC1 OS=Arabidopsis thaliana GN=SOC1 PE=1 SV=1//5.97683e-106
	BnaC08g28320D	0.161973	0.193883	40.4001	25.0528	UP	DOWN	FALSE	UP	AGL18; Agamous-like MADS-box protein AGL18	sp|Q9M2K8|AGL18_ARATH Agamous-like MADS-box protein AGL18 OS=Arabidopsis thaliana GN=AGL18 PE=2 SV=1//9.75297e-130
	BnaC08g34920D	0.363628	0.428412	3.00113	1.96463	UP	FALSE	FALSE	UP	SVP; MADS-box protein SVP	sp|Q9FVC1|SVP_ARATH MADS-box protein SVP OS=Arabidopsis thaliana GN=SVP PE=1 SV=1//2.63451e-149
	BnaC09g46500D	4.78258	5.54406	12.1649	10.1729	UP	FALSE	FALSE	UP	FLC; MADS-box protein FLOWERING LOCUS C	sp|Q9S7Q7|FLC_ARATH MADS-box protein FLOWERING LOCUS C OS=Arabidopsis thaliana GN=FLC PE=2 SV=1//1.17057e-80
	BnaCnng56130D	1.38759	1.13247	1.54674	2.16841	UP	FALSE	FALSE	FALSE	AGL15; agamous-like MADS-box protein AGL15	sp|Q39295|AGL15_BRANA Agamous-like MADS-box protein AGL15 OS=Brassica napus GN=AGL15 PE=3 SV=1//8.05664e-138
MBF1(6)	BnaA03g19860D	5.85022	7.88274	353.392	601.972	UP	FALSE	FALSE	UP	MBF1A; multiprotein bridging factor 1A; K03627 putative transcription factor	sp|Q9SJI8|MBF1A_ARATH Multiprotein-bridging factor 1a OS=Arabidopsis thaliana GN=MBF1A PE=2 SV=1//2.91742e-92
	BnaA07g05600D	5.89288	6.64222	99.6337	109.702	UP	FALSE	FALSE	UP	MBF1C; multiprotein-bridging factor 1c; K03627 putative transcription factor	sp|Q9LV58|MBF1C_ARATH Multiprotein-bridging factor 1c OS=Arabidopsis thaliana GN=MBF1C PE=1 SV=1//3.07796e-95
	BnaC03g23850D	20.5135	20.7418	355.043	439.012	UP	FALSE	FALSE	UP	MBF1A; multiprotein bridging factor 1A; K03627 putative transcription factor	sp|Q9SJI8|MBF1A_ARATH Multiprotein-bridging factor 1a OS=Arabidopsis thaliana GN=MBF1A PE=2 SV=1//2.91742e-92
	BnaC06g16800D	45.2011	55.0336	156.216	183.599	UP	FALSE	FALSE	UP	MBF1B; multiprotein-bridging factor 1b; K03627 putative transcription factor	sp|Q9LXT3|MBF1B_ARATH Multiprotein-bridging factor 1b OS=Arabidopsis thaliana GN=MBF1B PE=2 SV=1//2.73243e-92
	BnaC07g07150D	16.266	20.1025	144.266	169.556	UP	FALSE	FALSE	UP	MBF1C; multiprotein-bridging factor 1c; K03627 putative transcription factor	sp|Q9LV58|MBF1C_ARATH Multiprotein-bridging factor 1c OS=Arabidopsis thaliana GN=MBF1C PE=1 SV=1//2.76343e-92
	BnaC08g29390D	2.04025	1.97824	1.93125	2.80707	UP	FALSE	FALSE	FALSE	protein kinase family protein	sp|Q0WRY5|CDL1_ARATH Serine/threonine-protein kinase CDL1 OS=Arabidopsis thaliana GN=CDL1 PE=1 SV=1//2.26446e-97
MED7(3)	BnaA10g26710D	4.35359	4.41185	16.7533	14.1787	UP	FALSE	FALSE	UP	Mediator complex, subunit Med7; K15148 mediator of RNA polymerase II transcription subunit 7	sp|Q9LYW3|MED7A_ARATH Mediator of RNA polymerase II transcription subunit 7a OS=Arabidopsis thaliana GN=MED7A PE=1 SV=1//6.04346e-95
	BnaAnng18420D	4.9459	4.87162	5.53175	7.5295	UP	FALSE	FALSE	UP	Mediator complex, subunit Med7; K15148 mediator of RNA polymerase II transcription subunit 7	sp|Q9LYW3|MED7A_ARATH Mediator of RNA polymerase II transcription subunit 7a OS=Arabidopsis thaliana GN=MED7A PE=1 SV=1//4.06875e-99
	BnaCnng02980D	2.49792	2.22571	4.02465	4.10522	UP	FALSE	FALSE	UP	Mediator complex, subunit Med7; K15148 mediator of RNA polymerase II transcription subunit 7	sp|Q9LYW3|MED7A_ARATH Mediator of RNA polymerase II transcription subunit 7a OS=Arabidopsis thaliana GN=MED7A PE=1 SV=1//7.64795e-81
mTERF(3)	BnaA04g00300D	3.40636	3.81589	0.119584	0.461616	DOWN	FALSE	FALSE	DOWN	transcription termination factor family protein; K15032 mTERF domain-containing protein, mitochondrial	-//-
	BnaA06g17740D	1.37859	1.54085	0.205468	0.639645	FALSE	FALSE	FALSE	DOWN	mitochondrial transcription termination factor family protein; K15032 mTERF domain-containing protein, mitochondrial	-//-
	BnaC03g44350D	2.75935	3.1796	0.0403062	0.0970656	DOWN	FALSE	FALSE	DOWN	mitochondrial transcription termination factor family protein; K15032 mTERF domain-containing protein, mitochondrial	-//-
MYB(123)	BnaA01g00670D	9.55395	16.361	33.2206	76.9781	UP	UP	FALSE	UP	MYB73; myb domain protein 73; K09422 myb proto-oncogene protein, plant	sp|Q9FDW1|MYB44_ARATH Transcription factor MYB44 OS=Arabidopsis thaliana GN=MYB44 PE=2 SV=1//2.14882e-88
	BnaA01g11280D	0.829803	0.524868	74.4553	65.3153	UP	FALSE	FALSE	UP	MYB102; R2R3 family MYB transcription factor; K09422 myb proto-oncogene protein, plant	sp|Q8GWP0|MYB39_ARATH Transcription factor MYB39 OS=Arabidopsis thaliana GN=MYB39 PE=2 SV=1//2.18427e-66
	BnaA01g32200D	1.58514	1.81234	0.019581	0.0848999	DOWN	FALSE	FALSE	DOWN	protein REVEILLE 8	sp|Q8RWU3|RVE8_ARATH Protein REVEILLE 8 OS=Arabidopsis thaliana GN=RVE8 PE=2 SV=1//8.47166e-131
	BnaA02g03170D	0.819236	1.00142	0.0380582	0.159761	DOWN	FALSE	FALSE	DOWN	MYB43; myb domain protein 43; K09422 myb proto-oncogene protein, plant	sp|Q50EX6|ODO1_PETHY Protein ODORANT1 OS=Petunia hybrida GN=ODO1 PE=2 SV=1//4.58738e-79
	BnaA02g03510D	0.637643	0.46362	1.39663	1.88696	UP	FALSE	FALSE	FALSE	RVE1; myb family transcription factor RVE1	sp|F4KGY6|RVE1_ARATH Protein REVEILLE 1 OS=Arabidopsis thaliana GN=RVE1 PE=2 SV=1//9.70042e-138
	BnaA02g25380D	3.5773	3.5725	5.32177	6.21234	UP	FALSE	FALSE	UP	myb-like transcription factor family protein	sp|Q2V9B0|MY1R1_SOLTU Transcription factor MYB1R1 OS=Solanum tuberosum PE=2 SV=1//3.54129e-36
	BnaA02g33410D	5.69315	4.69661	13.4736	14.8734	UP	FALSE	FALSE	UP	MYB96; Myb transcription factor; K09422 myb proto-oncogene protein, plant	sp|P81392|MYB06_ANTMA Myb-related protein 306 OS=Antirrhinum majus GN=MYB306 PE=2 SV=1//3.40625e-79
	BnaA03g00640D	3.65343	7.78504	0.821144	2.53579	DOWN	UP	UP	DOWN	LCL1; protein LHY/CCA1-like 1	sp|Q6R0G4|RVE4_ARATH Protein REVEILLE 4 OS=Arabidopsis thaliana GN=RVE4 PE=2 SV=1//5.38754e-125
	BnaA03g01420D	2.49213	4.13181	22.339	59.4809	UP	UP	FALSE	UP	duplicated SANT DNA-binding domain-containing protein	sp|Q8S9H7|DIV_ANTMA Transcription factor DIVARICATA OS=Antirrhinum majus GN=DIVARICATA PE=2 SV=1//3.67668e-54
	BnaA03g05370D	2.27028	2.75939	0.0172774	0.0961808	DOWN	FALSE	FALSE	DOWN	MYB16; myb domain protein 16; K09422 myb proto-oncogene protein, plant	sp|Q8GWP0|MYB39_ARATH Transcription factor MYB39 OS=Arabidopsis thaliana GN=MYB39 PE=2 SV=1//2.58156e-67
	BnaA03g06490D	0.20687	0.0905014	1.43698	2.14345	UP	FALSE	FALSE	UP	RVE1; myb family transcription factor RVE1	sp|F4KGY6|RVE1_ARATH Protein REVEILLE 1 OS=Arabidopsis thaliana GN=RVE1 PE=2 SV=1//1.17038e-148
	BnaA03g12550D	4.91779	5.61816	21.0932	19.3922	UP	FALSE	FALSE	UP	myb family transcription factor	sp|Q8H0W3|RVE6_ARATH Protein REVEILLE 6 OS=Arabidopsis thaliana GN=RVE6 PE=2 SV=1//5.57182e-139
	BnaA03g24010D	2.5214	1.62498	2.68707	4.18504	UP	FALSE	FALSE	FALSE	MYB6; transcription repressor MYB6; K09422 myb proto-oncogene protein, plant	sp|Q38851|MYB6_ARATH Transcription repressor MYB6 OS=Arabidopsis thaliana GN=MYB6 PE=1 SV=1//4.28191e-118
	BnaA03g29470D	0.102257	0.0494215	1.11482	0.909326	UP	FALSE	FALSE	UP	MYB108; putative transcription factor MYB108; K09422 myb proto-oncogene protein, plant	sp|Q9LDE1|MY108_ARATH Transcription factor MYB108 OS=Arabidopsis thaliana GN=MYB108 PE=1 SV=1//8.08896e-103
	BnaA03g30340D	0.174755	0.181204	2.42162	3.10766	UP	FALSE	FALSE	UP	MYB83; myb domain protein 83; K09422 myb proto-oncogene protein, plant	sp|Q9LXV2|MYB46_ARATH Transcription factor MYB46 OS=Arabidopsis thaliana GN=MYB46 PE=2 SV=1//2.08334e-63
	BnaA03g40690D	7.58753	3.39593	14.9126	18.1452	UP	FALSE	DOWN	UP	MYB77; myb domain protein 77; K09422 myb proto-oncogene protein, plant	sp|Q9FDW1|MYB44_ARATH Transcription factor MYB44 OS=Arabidopsis thaliana GN=MYB44 PE=2 SV=1//1.54597e-84
	BnaA03g53110D	0.786641	1.07586	1.62724	1.4606	FALSE	FALSE	FALSE	UP	MYB32; transcription factor MYB32; K09422 myb proto-oncogene protein, plant	sp|O49608|MYB32_ARATH Transcription factor MYB32 OS=Arabidopsis thaliana GN=MYB32 PE=2 SV=1//2.92059e-135
	BnaA04g01380D	0.629764	0.50557	1.21397	0.737087	FALSE	FALSE	FALSE	UP	DNA-binding bromodomain-containing protein	-//-
	BnaA04g21820D	0.874515	0.881021	2.03881	1.32708	UP	FALSE	FALSE	UP	Duplicated homeodomain-like superfamily protein	sp|Q8S9H7|DIV_ANTMA Transcription factor DIVARICATA OS=Antirrhinum majus GN=DIVARICATA PE=2 SV=1//2.98218e-91
	BnaA04g24320D	0.844946	0.8126	2.17216	1.94238	UP	FALSE	FALSE	UP	DNA-binding bromodomain-containing protein	-//-
	BnaA05g01050D	1.48153	1.95271	29.0134	27.4385	UP	FALSE	FALSE	UP	CCA1; protein CCA1; K12134 circadian clock associated 1	sp|P92973|CCA1_ARATH Protein CCA1 OS=Arabidopsis thaliana GN=CCA1 PE=1 SV=1//0
	BnaA05g07470D	1.84038	1.52368	3.20853	2.54962	UP	FALSE	FALSE	UP	TKI1; TSL-kinase interacting protein 1	sp|Q8LJT8|TKI1_ARATH TSL-kinase interacting protein 1 OS=Arabidopsis thaliana GN=TKI1 PE=1 SV=2//0
	BnaA05g12950D	8.3667	5.93405	25.2503	19.4475	UP	FALSE	FALSE	UP	RVE2; MYB family transcription factor Circadian 1	sp|F4K5X6|RVE2_ARATH Protein REVEILLE 2 OS=Arabidopsis thaliana GN=RVE2 PE=2 SV=1//1.3071e-118
	BnaA05g19710D	3.65945	3.38623	10.2188	7.44483	UP	DOWN	FALSE	UP	ALY3; protein ALWAYS EARLY 3	sp|Q6A332|ALY3_ARATH Protein ALWAYS EARLY 3 OS=Arabidopsis thaliana GN=ALY3 PE=1 SV=1//0
	BnaA05g22120D	1.35498	1.66847	3.2165	3.31823	UP	FALSE	FALSE	UP	MYB4R1; myb domain protein 4r1; K09422 myb proto-oncogene protein, plant	sp|Q54NA6|MYBL_DICDI Myb-like protein L OS=Dictyostelium discoideum GN=mybL PE=3 SV=1//1.64079e-59
	BnaA05g29060D	1.13995	1.22634	2.31267	1.85459	UP	FALSE	FALSE	UP	MYB3R-3; c-myb-like transcription factor MYB3R3; K09422 myb proto-oncogene protein, plant	sp|Q9S7G7|MB3R1_ARATH Myb-related protein 3R-1 OS=Arabidopsis thaliana GN=MYB3R-1 PE=2 SV=1//1.02446e-79
	BnaA05g29910D	1.86044	1.79541	3.52079	3.39744	UP	FALSE	FALSE	UP	ADA2A; transcriptional adapter ADA2a; K11314 transcriptional adapter 2-alpha	sp|Q9SFD5|TAD2A_ARATH Transcriptional adapter ADA2a OS=Arabidopsis thaliana GN=ADA2A PE=1 SV=1//0
	BnaA05g30870D	0.0709726	0.0872843	3.69847	8.87865	UP	UP	FALSE	UP	MYB108; putative transcription factor MYB108; K09422 myb proto-oncogene protein, plant	sp|Q9LDE1|MY108_ARATH Transcription factor MYB108 OS=Arabidopsis thaliana GN=MYB108 PE=1 SV=1//2.53285e-162
	BnaA06g03350D	16.9045	25.9233	0.209745	0.514001	DOWN	FALSE	UP	DOWN	myb/SANT-like DNA-binding domain-containing protein	sp|Q8S9H7|DIV_ANTMA Transcription factor DIVARICATA OS=Antirrhinum majus GN=DIVARICATA PE=2 SV=1//8.61364e-40
	BnaA06g05660D	25.0957	25.5483	50.4945	39.9543	UP	DOWN	FALSE	UP	CDC5; cell division cycle 5-like protein; K12860 pre-mRNA-splicing factor CDC5/CEF1	sp|P92948|CDC5L_ARATH Cell division cycle 5-like protein OS=Arabidopsis thaliana GN=CDC5 PE=1 SV=2//0
	BnaA06g12480D	14.6648	8.89589	16.8245	27.7934	UP	FALSE	FALSE	UP	myb family transcription factor	sp|F4J2J6|RVE7L_ARATH Protein REVEILLE 7-like OS=Arabidopsis thaliana GN=RVE7L PE=3 SV=1//4.07717e-132
	BnaA07g10350D	9.249	4.41067	131.208	124.107	UP	FALSE	DOWN	UP	MYB3; transcription factor MYB3; K09422 myb proto-oncogene protein, plant	sp|Q9S9K9|MYB3_ARATH Transcription factor MYB3 OS=Arabidopsis thaliana GN=MYB3 PE=1 SV=1//1.88071e-122
	BnaA07g11930D	25.2065	18.1726	100.504	121.921	UP	FALSE	FALSE	UP	MYBR1; transcription factor MYB44; K09422 myb proto-oncogene protein, plant	sp|Q9FDW1|MYB44_ARATH Transcription factor MYB44 OS=Arabidopsis thaliana GN=MYB44 PE=2 SV=1//3.85879e-129
	BnaA07g24010D	11.0246	11.1694	64.047	55.9563	UP	FALSE	FALSE	UP	myb-like transcription factor	sp|Q2V9B0|MY1R1_SOLTU Transcription factor MYB1R1 OS=Solanum tuberosum PE=2 SV=1//3.89472e-38
	BnaA07g25800D	3.39055	5.67743	0.299602	0.800037	DOWN	FALSE	FALSE	DOWN	MYB90; transcription factor MYB90; K09422 myb proto-oncogene protein, plant	sp|Q9ZTC3|MYB90_ARATH Transcription factor MYB90 OS=Arabidopsis thaliana GN=MYB90 PE=1 SV=1//5.23621e-120
	BnaA07g29070D	1.73622	1.44585	5.61815	8.48528	UP	FALSE	FALSE	UP	MYBL2; putative myb family transcription factor; K09422 myb proto-oncogene protein, plant	sp|P81393|MYB08_ANTMA Myb-related protein 308 OS=Antirrhinum majus GN=MYB308 PE=2 SV=1//1.26607e-24
	BnaA07g38930D	2.49695	2.28963	5.09476	4.40076	UP	FALSE	FALSE	UP	eukaryotic initiation factor 4A-3; K03257 translation initiation factor 4A	sp|Q9CAI7|IF4A3_ARATH Eukaryotic initiation factor 4A-3 OS=Arabidopsis thaliana GN=TIF4A-3 PE=1 SV=1//0
	BnaA08g11190D	0.568156	0.616858	1.1873	0.850009	UP	FALSE	FALSE	UP	CHB3; SWI/SNF complex subunit SWI3D; K11649 SWI/SNF related-matrix-associated actin-dependent regulator of chromatin subfamily C	sp|Q8VY05|SWI3D_ARATH SWI/SNF complex subunit SWI3D OS=Arabidopsis thaliana GN=SWI3D PE=1 SV=3//0
	BnaA08g22580D	3.02675	2.46656	0.380937	1.06976	FALSE	FALSE	FALSE	DOWN	MYB51; myb domain protein 51; K09422 myb proto-oncogene protein, plant	sp|O49782|MYB51_ARATH Transcription factor MYB51 OS=Arabidopsis thaliana GN=MYB51 PE=1 SV=2//1.32737e-152
	BnaA08g23070D	2.35844	2.65994	3.71598	3.32595	UP	FALSE	FALSE	UP	putative telomere repeat-binding factor 4; K09422 myb proto-oncogene protein, plant	sp|F4I7L1|TRB4_ARATH Telomere repeat-binding factor 4 OS=Arabidopsis thaliana GN=At1g17520 PE=2 SV=2//2.59883e-112
	BnaA08g29670D	10.2514	13.6737	0.077942	0.418777	DOWN	FALSE	FALSE	DOWN	myb/SANT-like DNA-binding domain-containing protein	sp|Q8S9H7|DIV_ANTMA Transcription factor DIVARICATA OS=Antirrhinum majus GN=DIVARICATA PE=2 SV=1//3.51958e-41
	BnaA09g00080D	5.58416	6.07562	11.7774	11.1053	UP	FALSE	FALSE	UP	homeodomain-like superfamily protein	sp|C0SVG5|RVE5_ARATH Protein REVEILLE 5 OS=Arabidopsis thaliana GN=RVE5 PE=2 SV=1//8.326e-121
	BnaA09g06090D	2.01341	1.89091	3.14559	3.27791	UP	FALSE	FALSE	UP	MYB96; Myb transcription factor; K09422 myb proto-oncogene protein, plant	sp|P81392|MYB06_ANTMA Myb-related protein 306 OS=Antirrhinum majus GN=MYB306 PE=2 SV=1//2.26049e-79
	BnaA09g14920D	2.74563	2.82639	20.0401	18.3316	UP	FALSE	FALSE	UP	homeodomain-like superfamily protein	-//-
	BnaA09g30490D	3.84313	4.09378	37.0747	38.6205	UP	FALSE	FALSE	UP	MYB3; transcription factor MYB3; K09422 myb proto-oncogene protein, plant	sp|Q9S9K9|MYB3_ARATH Transcription factor MYB3 OS=Arabidopsis thaliana GN=MYB3 PE=1 SV=1//2.73624e-122
	BnaA09g44370D	4.25642	4.19916	20.6232	17.9068	UP	FALSE	FALSE	UP	myb family transcription factor	sp|Q2V9B0|MY1R1_SOLTU Transcription factor MYB1R1 OS=Solanum tuberosum PE=2 SV=1//5.18339e-49
	BnaA09g52130D	0.834632	0.673778	1.48227	2.37139	UP	FALSE	FALSE	UP	MYB55; putative transcription factor MYB55; K09422 myb proto-oncogene protein, plant	sp|Q8LPH6|MYB86_ARATH Transcription factor MYB86 OS=Arabidopsis thaliana GN=MYB86 PE=2 SV=1//1.18783e-68
	BnaA09g55480D	0.964835	1.11318	1.95205	1.92466	UP	FALSE	FALSE	UP	DNA-binding bromodomain-containing protein	-//-
	BnaA10g00430D	1.18064	2.17213	1.85529	3.27658	UP	FALSE	FALSE	UP	transcription factor ASG4	sp|Q6R0H0|RVE3_ARATH Protein REVEILLE 3 OS=Arabidopsis thaliana GN=RVE3 PE=2 SV=1//2.47349e-150
	BnaA10g04120D	1.792	1.66261	5.32971	5.01214	UP	FALSE	FALSE	UP	MYB13; myb domain protein 13; K09422 myb proto-oncogene protein, plant	sp|Q7XBH4|MYB4_ORYSJ Myb-related protein Myb4 OS=Oryza sativa subsp. japonica GN=MYB4 PE=2 SV=2//2.90422e-67
	BnaA10g10930D	1.42679	3.9999	0.0876369	0.244471	DOWN	FALSE	UP	DOWN	myb-like transcription factor family protein	sp|Q2V9B0|MY1R1_SOLTU Transcription factor MYB1R1 OS=Solanum tuberosum PE=2 SV=1//4.72368e-15
	BnaA10g11980D	4.25785	1.45061	6.04521	2.82846	UP	DOWN	DOWN	UP	myb-like HTH transcriptional regulator family protein	sp|Q8W119|SMH4_MAIZE Single myb histone 4 OS=Zea mays GN=SMH4 PE=2 SV=1//3.56025e-06
	BnaA10g25530D	0.0508372	0.0443339	5.43796	5.0069	UP	FALSE	FALSE	UP	duplicated SANT DNA-binding domain-containing protein	sp|Q8S9H7|DIV_ANTMA Transcription factor DIVARICATA OS=Antirrhinum majus GN=DIVARICATA PE=2 SV=1//4.81217e-38
	BnaA10g28420D	1.71693	2.21628	2.28924	3.12729	UP	FALSE	FALSE	UP	myb family transcription factor	sp|Q8H0W3|RVE6_ARATH Protein REVEILLE 6 OS=Arabidopsis thaliana GN=RVE6 PE=2 SV=1//2.01802e-149
	BnaAnng01040D	0.610185	0.86538	2.89385	3.25129	UP	FALSE	FALSE	UP	duplicated SANT DNA-binding domain-containing protein	sp|Q8S9H7|DIV_ANTMA Transcription factor DIVARICATA OS=Antirrhinum majus GN=DIVARICATA PE=2 SV=1//8.69901e-52
	BnaAnng03830D	2.0284	1.32403	16.3303	13.8727	UP	FALSE	FALSE	UP	MYB77; myb domain protein 77; K09422 myb proto-oncogene protein, plant	sp|Q9FDW1|MYB44_ARATH Transcription factor MYB44 OS=Arabidopsis thaliana GN=MYB44 PE=2 SV=1//9.62808e-81
	BnaAnng06630D	5.25548	5.51056	0.0182372	0.113153	DOWN	FALSE	FALSE	DOWN	MYB34; myb domain protein 34; K09422 myb proto-oncogene protein, plant	sp|O64399|MYB34_ARATH Transcription factor MYB34 OS=Arabidopsis thaliana GN=MYB34 PE=1 SV=1//3.21371e-142
	BnaAnng13960D	2.46025	2.71589	5.39066	11.705	UP	UP	FALSE	UP	duplicated SANT DNA-binding domain-containing protein	sp|Q8S9H7|DIV_ANTMA Transcription factor DIVARICATA OS=Antirrhinum majus GN=DIVARICATA PE=2 SV=1//2.53178e-65
	BnaAnng15540D	19.7786	16.0072	66.2329	65.0404	UP	FALSE	FALSE	UP	myb-like transcription factor family protein	sp|Q8S9H7|DIV_ANTMA Transcription factor DIVARICATA OS=Antirrhinum majus GN=DIVARICATA PE=2 SV=1//1.03347e-29
	BnaC01g01660D	10.1209	9.32646	76.0077	99.9389	UP	FALSE	FALSE	UP	MYB73; myb domain protein 73; K09422 myb proto-oncogene protein, plant	sp|Q9FDW1|MYB44_ARATH Transcription factor MYB44 OS=Arabidopsis thaliana GN=MYB44 PE=2 SV=1//1.1903e-89
	BnaC01g21010D	16.9559	14.9895	57.6079	59.9006	UP	FALSE	FALSE	UP	myb-like transcription factor family protein	sp|Q8S9H7|DIV_ANTMA Transcription factor DIVARICATA OS=Antirrhinum majus GN=DIVARICATA PE=2 SV=1//1.51135e-29
	BnaC01g41180D	0.731639	0.576705	26.981	31.5674	UP	FALSE	FALSE	UP	MYB102; R2R3 family MYB transcription factor; K09422 myb proto-oncogene protein, plant	sp|Q8GWP0|MYB39_ARATH Transcription factor MYB39 OS=Arabidopsis thaliana GN=MYB39 PE=2 SV=1//2.1383e-66
	BnaC02g07210D	0.0448057	0.318345	1.27153	0.95429	UP	FALSE	FALSE	UP	RVE1; myb family transcription factor RVE1	sp|F4KGY6|RVE1_ARATH Protein REVEILLE 1 OS=Arabidopsis thaliana GN=RVE1 PE=2 SV=1//8.02551e-152
	BnaC02g27760D	0.326978	0.356355	3.28919	4.23926	UP	FALSE	FALSE	UP	CPL3; CAPRICE-like MYB3; K09422 myb proto-oncogene protein, plant	sp|Q9M157|ETC3_ARATH MYB-like transcription factor ETC3 OS=Arabidopsis thaliana GN=ETC3 PE=2 SV=1//2.43351e-25
	BnaC02g41860D	6.39069	7.24569	0.0414935	0.165089	DOWN	FALSE	FALSE	DOWN	MYB34; myb domain protein 34; K09422 myb proto-oncogene protein, plant	sp|O64399|MYB34_ARATH Transcription factor MYB34 OS=Arabidopsis thaliana GN=MYB34 PE=1 SV=1//7.94043e-127
	BnaC02g44890D	0.514326	0.412295	0.432799	1.0465	UP	FALSE	FALSE	FALSE	MYB82; transcription factor MYB82; K09422 myb proto-oncogene protein, plant	sp|Q9LTF7|MYB82_ARATH Transcription factor MYB82 OS=Arabidopsis thaliana GN=MYB82 PE=1 SV=1//5.71027e-93
	BnaC02g46900D	3.92533	3.48266	4.57975	5.51416	UP	FALSE	FALSE	UP	myb-like transcription factor family protein	sp|Q2V9B0|MY1R1_SOLTU Transcription factor MYB1R1 OS=Solanum tuberosum PE=2 SV=1//4.29646e-36
	BnaC03g00040D	2.66495	0.0192624	3.41035	0.033599	FALSE	DOWN	DOWN	UP	LHY; protein LHY; K12133 MYB-related transcription factor LHY	sp|Q6R0H1|LHY_ARATH Protein LHY OS=Arabidopsis thaliana GN=LHY PE=1 SV=2//0
	BnaC03g01730D	4.61001	0.128451	29.441	2.18395	UP	DOWN	DOWN	UP	duplicated SANT DNA-binding domain-containing protein	sp|Q8S9H7|DIV_ANTMA Transcription factor DIVARICATA OS=Antirrhinum majus GN=DIVARICATA PE=2 SV=1//8.03237e-54
	BnaC03g08310D	2.0464	1.4256	8.01186	9.76311	UP	FALSE	FALSE	UP	RVE1; myb family transcription factor RVE1	sp|F4KGY6|RVE1_ARATH Protein REVEILLE 1 OS=Arabidopsis thaliana GN=RVE1 PE=2 SV=1//4.71766e-153
	BnaC03g15430D	9.46004	8.91344	26.3615	23.834	UP	FALSE	FALSE	UP	myb family transcription factor	sp|Q8H0W3|RVE6_ARATH Protein REVEILLE 6 OS=Arabidopsis thaliana GN=RVE6 PE=2 SV=1//1.1018e-152
	BnaC03g26060D	1.16754	0.713461	2.17738	1.67635	UP	FALSE	FALSE	UP	MYB12; transcription factor MYB12; K09422 myb proto-oncogene protein, plant	sp|O22264|MYB12_ARATH Transcription factor MYB12 OS=Arabidopsis thaliana GN=MYB12 PE=2 SV=1//2.02193e-143
	BnaC03g28550D	2.27085	2.27812	2.23163	3.93842	UP	FALSE	FALSE	FALSE	MYB6; transcription repressor MYB6; K09422 myb proto-oncogene protein, plant	sp|Q38851|MYB6_ARATH Transcription repressor MYB6 OS=Arabidopsis thaliana GN=MYB6 PE=1 SV=1//2.01399e-124
	BnaC03g55550D	3.18996	3.58997	0.0218756	0.0827183	DOWN	FALSE	FALSE	DOWN	MYB59; transcription factor MYB59; K09422 myb proto-oncogene protein, plant	sp|Q9LX82|MYB48_ARATH Transcription factor MYB48 OS=Arabidopsis thaliana GN=MYB48 PE=2 SV=1//8.62365e-137
	BnaC03g64160D	0.0549287	0.0489528	7.92943	8.79846	UP	FALSE	FALSE	UP	MYB102; R2R3 family MYB transcription factor; K09422 myb proto-oncogene protein, plant	sp|Q8GWP0|MYB39_ARATH Transcription factor MYB39 OS=Arabidopsis thaliana GN=MYB39 PE=2 SV=1//2.59086e-66
	BnaC04g00590D	0.541486	0.6644	9.39044	9.11815	UP	FALSE	FALSE	UP	CCA1; protein CCA1; K12134 circadian clock associated 1	sp|P92973|CCA1_ARATH Protein CCA1 OS=Arabidopsis thaliana GN=CCA1 PE=1 SV=1//0
	BnaC04g03690D	2.87578	3.34666	6.17097	4.73214	UP	FALSE	FALSE	UP	DNA-binding bromodomain-containing protein	-//-
	BnaC04g08290D	3.41039	3.34616	7.97984	6.02238	UP	DOWN	FALSE	UP	TKI1; TSL-kinase interacting protein 1	sp|Q8LJT8|TKI1_ARATH TSL-kinase interacting protein 1 OS=Arabidopsis thaliana GN=TKI1 PE=1 SV=2//0
	BnaC04g08340D	0.401229	0.420028	0.346897	1.14497	UP	UP	FALSE	FALSE	RAX2; transcription factor RAX2; K09422 myb proto-oncogene protein, plant	sp|Q9SJL7|RAX2_ARATH Transcription factor RAX2 OS=Arabidopsis thaliana GN=RAX2 PE=1 SV=1//8.56156e-120
	BnaC04g35730D	2.61736	4.0143	0.177946	0.757162	DOWN	FALSE	FALSE	DOWN	MYB70; myb domain protein 70; K09422 myb proto-oncogene protein, plant	sp|Q9FDW1|MYB44_ARATH Transcription factor MYB44 OS=Arabidopsis thaliana GN=MYB44 PE=2 SV=1//5.61674e-82
	BnaC04g45680D	1.74279	1.63949	3.65747	3.95533	UP	FALSE	FALSE	UP	Duplicated homeodomain-like superfamily protein	sp|Q8S9H7|DIV_ANTMA Transcription factor DIVARICATA OS=Antirrhinum majus GN=DIVARICATA PE=2 SV=1//5.24385e-87
	BnaC04g52010D	0.377173	0.361425	2.95031	2.76138	UP	FALSE	FALSE	UP	MYB12; transcription factor MYB12; K09422 myb proto-oncogene protein, plant	sp|O22264|MYB12_ARATH Transcription factor MYB12 OS=Arabidopsis thaliana GN=MYB12 PE=2 SV=1//1.29689e-95
	BnaC05g04250D	5.27993	5.56808	33.6366	35.2702	UP	FALSE	FALSE	UP	MYB13; myb domain protein 13; K09422 myb proto-oncogene protein, plant	sp|Q7XBH4|MYB4_ORYSJ Myb-related protein Myb4 OS=Oryza sativa subsp. japonica GN=MYB4 PE=2 SV=2//1.72543e-67
	BnaC05g07200D	23.5701	23.1003	40.843	30.3909	UP	DOWN	FALSE	UP	CDC5; cell division cycle 5-like protein; K12860 pre-mRNA-splicing factor CDC5/CEF1	sp|P92948|CDC5L_ARATH Cell division cycle 5-like protein OS=Arabidopsis thaliana GN=CDC5 PE=1 SV=2//0
	BnaC05g13640D	3.82113	3.80564	9.85115	9.05653	UP	FALSE	FALSE	UP	putative telomere repeat-binding factor 4; K09422 myb proto-oncogene protein, plant	sp|F4I7L1|TRB4_ARATH Telomere repeat-binding factor 4 OS=Arabidopsis thaliana GN=At1g17520 PE=2 SV=2//1.46795e-106
	BnaC05g17910D	1.86915	2.59213	44.2789	42.2933	UP	FALSE	FALSE	UP	MYB3; transcription factor MYB3; K09422 myb proto-oncogene protein, plant	sp|Q9S9K9|MYB3_ARATH Transcription factor MYB3 OS=Arabidopsis thaliana GN=MYB3 PE=1 SV=1//5.09284e-122
	BnaC05g35410D	0.995023	1.79438	3.07524	3.84445	UP	FALSE	FALSE	UP	MYB4R1; myb domain protein 4r1; K09422 myb proto-oncogene protein, plant	-//-
	BnaC05g43530D	1.73822	2.09172	3.8609	2.9163	UP	FALSE	FALSE	UP	MYB3R-3; c-myb-like transcription factor MYB3R3; K09422 myb proto-oncogene protein, plant	sp|Q9S7G7|MB3R1_ARATH Myb-related protein 3R-1 OS=Arabidopsis thaliana GN=MYB3R-1 PE=2 SV=1//2.24792e-79
	BnaC05g45330D	0.0323374	0.0178434	1.12357	2.79441	UP	UP	FALSE	UP	MYB108; putative transcription factor MYB108; K09422 myb proto-oncogene protein, plant	sp|Q9LDE1|MY108_ARATH Transcription factor MYB108 OS=Arabidopsis thaliana GN=MYB108 PE=1 SV=1//2.41669e-172
	BnaC06g12130D	20.7864	11.9961	129.32	95.0076	UP	DOWN	DOWN	UP	RVE2; MYB family transcription factor Circadian 1	sp|F4K5X6|RVE2_ARATH Protein REVEILLE 2 OS=Arabidopsis thaliana GN=RVE2 PE=2 SV=1//1.77172e-128
	BnaC06g25000D	11.4086	14.3524	37.6065	34.7866	UP	FALSE	FALSE	UP	myb-like transcription factor	sp|Q2V9B0|MY1R1_SOLTU Transcription factor MYB1R1 OS=Solanum tuberosum PE=2 SV=1//5.27621e-38
	BnaC06g32180D	1.70391	2.5738	3.49415	3.28945	UP	FALSE	FALSE	UP	MYBL2; putative myb family transcription factor; K09422 myb proto-oncogene protein, plant	sp|P81393|MYB08_ANTMA Myb-related protein 308 OS=Antirrhinum majus GN=MYB308 PE=2 SV=1//2.46427e-25
	BnaC06g33880D	1.6016	1.85613	4.18351	5.20379	UP	FALSE	FALSE	UP	putative telomere repeat-binding factor 4; K09422 myb proto-oncogene protein, plant	sp|F4IEY4|TRB5_ARATH Telomere repeat-binding factor 5 OS=Arabidopsis thaliana GN=At1g72740 PE=2 SV=1//3.29101e-92
	BnaC07g13600D	2.37511	1.76495	40.973	35.942	UP	FALSE	FALSE	UP	MYB3; transcription factor MYB3; K09422 myb proto-oncogene protein, plant	sp|Q9S9K9|MYB3_ARATH Transcription factor MYB3 OS=Arabidopsis thaliana GN=MYB3 PE=1 SV=1//7.8081e-132
	BnaC07g16030D	18.3123	10.9	38.9489	57.7112	UP	FALSE	DOWN	UP	MYBR1; transcription factor MYB44; K09422 myb proto-oncogene protein, plant	sp|Q9FDW1|MYB44_ARATH Transcription factor MYB44 OS=Arabidopsis thaliana GN=MYB44 PE=2 SV=1//9.87137e-131
	BnaC07g25120D	1.59679	1.49627	2.01272	2.16542	UP	FALSE	FALSE	UP	oxoglutarate/iron-dependent oxygenase; K00472 prolyl 4-hydroxylase [EC:1.14.11.2]	sp|Q8L970|P4H7_ARATH Probable prolyl 4-hydroxylase 7 OS=Arabidopsis thaliana GN=P4H7 PE=2 SV=1//3.29933e-174
	BnaC07g28070D	1.68331	1.60489	2.66492	2.76619	UP	FALSE	FALSE	UP	ALY1; protein ALWAYS EARLY 1	sp|Q6A331|ALY1_ARATH Protein ALWAYS EARLY 1 OS=Arabidopsis thaliana GN=ALY1 PE=2 SV=2//0
	BnaC07g31640D	26.1018	13.6442	99.7711	61.3121	UP	DOWN	DOWN	UP	MYB77; myb domain protein 77; K09422 myb proto-oncogene protein, plant	sp|Q9FDW1|MYB44_ARATH Transcription factor MYB44 OS=Arabidopsis thaliana GN=MYB44 PE=2 SV=1//5.3318e-88
	BnaC07g36700D	0.297555	0.32864	3.05975	2.01005	UP	FALSE	FALSE	UP	MYB102; R2R3 family MYB transcription factor; K09422 myb proto-oncogene protein, plant	sp|Q8GWP0|MYB39_ARATH Transcription factor MYB39 OS=Arabidopsis thaliana GN=MYB39 PE=2 SV=1//3.32874e-68
	BnaC07g43900D	1.75225	1.92836	5.55926	3.72864	UP	DOWN	FALSE	UP	PC-MYB1; myb-related protein 3R-1	sp|Q9S7G7|MB3R1_ARATH Myb-related protein 3R-1 OS=Arabidopsis thaliana GN=MYB3R-1 PE=2 SV=1//0
	BnaC07g45320D	2.00565	2.13033	4.04183	4.0878	UP	FALSE	FALSE	UP	MYB32; transcription factor MYB32; K09422 myb proto-oncogene protein, plant	sp|O49608|MYB32_ARATH Transcription factor MYB32 OS=Arabidopsis thaliana GN=MYB32 PE=2 SV=1//1.76227e-132
	BnaC07g46430D	0.0998789	0.188905	0.261471	1.1631	UP	UP	FALSE	FALSE	MYB73; myb domain protein 73; K09422 myb proto-oncogene protein, plant	sp|Q9FDW1|MYB44_ARATH Transcription factor MYB44 OS=Arabidopsis thaliana GN=MYB44 PE=2 SV=1//2.10488e-78
	BnaC08g18090D	1.86828	1.63305	1.82667	3.19863	UP	FALSE	FALSE	FALSE	MYB51; myb domain protein 51; K09422 myb proto-oncogene protein, plant	sp|O49782|MYB51_ARATH Transcription factor MYB51 OS=Arabidopsis thaliana GN=MYB51 PE=1 SV=2//3.25893e-150
	BnaC08g30340D	1.88649	2.39686	7.32926	8.48575	UP	FALSE	FALSE	UP	DNA-binding bromodomain-containing protein	-//-
	BnaC08g36920D	13.2741	13.3524	34.2708	42.951	UP	FALSE	FALSE	UP	myb family transcription factor	sp|Q2V9B0|MY1R1_SOLTU Transcription factor MYB1R1 OS=Solanum tuberosum PE=2 SV=1//1.79318e-53
	BnaC08g48630D	16.0626	12.5457	57.9184	44.7481	UP	DOWN	FALSE	UP	MYB77; myb domain protein 77; K09422 myb proto-oncogene protein, plant	sp|Q9FDW1|MYB44_ARATH Transcription factor MYB44 OS=Arabidopsis thaliana GN=MYB44 PE=2 SV=1//1.62811e-93
	BnaC09g14760D	0.355857	0.754734	2.39798	3.4816	UP	FALSE	FALSE	UP	CDC5; cell division cycle 5-like protein; K12860 pre-mRNA-splicing factor CDC5/CEF1	sp|P92948|CDC5L_ARATH Cell division cycle 5-like protein OS=Arabidopsis thaliana GN=CDC5 PE=1 SV=2//2.12274e-122
	BnaC09g15550D	3.38007	3.52173	18.6205	14.8028	UP	FALSE	FALSE	UP	homeodomain-like superfamily protein	-//-
	BnaC09g29430D	1.34514	1.59743	0.0516721	0.174688	DOWN	FALSE	FALSE	DOWN	TRY; transcription factor TRY; K09422 myb proto-oncogene protein, plant	sp|Q8GV05|TRY_ARATH Transcription factor TRY OS=Arabidopsis thaliana GN=TRY PE=1 SV=1//2.3065e-57
	BnaC09g33360D	4.07142	5.39459	0.524572	1.39105	DOWN	FALSE	FALSE	DOWN	myb-like transcription factor family protein	sp|Q2V9B0|MY1R1_SOLTU Transcription factor MYB1R1 OS=Solanum tuberosum PE=2 SV=1//4.36275e-13
	BnaC09g33810D	3.05589	3.04882	4.57746	5.18723	UP	FALSE	FALSE	UP	myb-like HTH transcriptional regulator family protein	sp|Q8W119|SMH4_MAIZE Single myb histone 4 OS=Zea mays GN=SMH4 PE=2 SV=1//9.38456e-06
	BnaC09g40660D	3.82569	2.45336	10.3659	14.3731	UP	FALSE	FALSE	UP	RVE1; myb family transcription factor RVE1	sp|F4KGY6|RVE1_ARATH Protein REVEILLE 1 OS=Arabidopsis thaliana GN=RVE1 PE=2 SV=1//5.52161e-22
	BnaC09g42570D	13.5526	14.4916	0.0356178	0.234321	DOWN	FALSE	FALSE	DOWN	MYB16; myb domain protein 16; K09422 myb proto-oncogene protein, plant	sp|Q9SPG5|MYB76_ARATH Transcription factor MYB76 OS=Arabidopsis thaliana GN=MYB76 PE=1 SV=1//1.27191e-65
	BnaC09g45060D	0.958298	1.42117	0.0401185	0.0956832	DOWN	FALSE	FALSE	DOWN	MYB3R-4; putative c-myb-like transcription factor MYB3R-4	sp|Q9S7G7|MB3R1_ARATH Myb-related protein 3R-1 OS=Arabidopsis thaliana GN=MYB3R-1 PE=2 SV=1//1.12912e-144
	BnaC09g50770D	0.343798	0.415433	1.0256	1.39031	UP	FALSE	FALSE	UP	ACT domain-containing protein	sp|Q9LZ23|ACR12_ARATH ACT domain-containing protein ACR12 OS=Arabidopsis thaliana GN=ACR12 PE=2 SV=1//7.59671e-149
	BnaCnng16520D	14.1018	16.1434	0.0603164	0.249276	DOWN	FALSE	FALSE	DOWN	myb/SANT-like DNA-binding domain-containing protein	sp|Q8S9H7|DIV_ANTMA Transcription factor DIVARICATA OS=Antirrhinum majus GN=DIVARICATA PE=2 SV=1//5.36747e-41
	BnaCnng21270D	3.0979	2.33606	0.110243	0.287258	DOWN	FALSE	FALSE	DOWN	MYB34; myb domain protein 34; K09422 myb proto-oncogene protein, plant	sp|O64399|MYB34_ARATH Transcription factor MYB34 OS=Arabidopsis thaliana GN=MYB34 PE=1 SV=1//2.80718e-158
	BnaCnng28030D	12.9785	10.0869	0.0223224	0.142914	DOWN	FALSE	FALSE	DOWN	PAP1; transcription factor MYB75; K16166 transcription factor MYB75	sp|Q9FE25|MYB75_ARATH Transcription factor MYB75 OS=Arabidopsis thaliana GN=MYB75 PE=1 SV=1//7.32097e-127
	BnaCnng46710D	13.0624	16.7691	0.13255	0.570153	DOWN	FALSE	FALSE	DOWN	myb/SANT-like DNA-binding domain-containing protein	sp|Q8S9H7|DIV_ANTMA Transcription factor DIVARICATA OS=Antirrhinum majus GN=DIVARICATA PE=2 SV=1//1.26024e-41
	BnaCnng47140D	1.54936	1.14027	0.0250567	0.136895	DOWN	FALSE	FALSE	DOWN	myb-like transcription factor family protein	sp|Q8S9H7|DIV_ANTMA Transcription factor DIVARICATA OS=Antirrhinum majus GN=DIVARICATA PE=2 SV=1//2.85474e-25
	BnaCnng49390D	1.15722	0.897145	0.0596129	0.172658	DOWN	FALSE	FALSE	DOWN	MYB65; myb domain protein 65; K09422 myb proto-oncogene protein, plant	sp|A2WW87|GAM1_ORYSI Transcription factor GAMYB OS=Oryza sativa subsp. indica GN=GAM1 PE=2 SV=1//6.8268e-80
	BnaCnng61660D	0.126913	0.207002	2.39644	1.46383	UP	FALSE	FALSE	UP	MYB56; myb domain protein 56; K09422 myb proto-oncogene protein, plant	sp|Q9FDW1|MYB44_ARATH Transcription factor MYB44 OS=Arabidopsis thaliana GN=MYB44 PE=2 SV=1//3.52102e-27
	BnaCnng67570D	0.901617	0.824446	1.91964	1.5632	UP	FALSE	FALSE	UP	MYB108; putative transcription factor MYB108; K09422 myb proto-oncogene protein, plant	sp|Q9LDE1|MY108_ARATH Transcription factor MYB108 OS=Arabidopsis thaliana GN=MYB108 PE=1 SV=1//2.607e-109
NAC(85)	BnaA01g01440D	0.249199	0.473426	0.736384	1.59424	UP	FALSE	FALSE	UP	NAC076; NAC domain containing protein 76	sp|O65508|NAC76_ARATH NAC domain-containing protein 76 OS=Arabidopsis thaliana GN=NAC076 PE=1 SV=1//0
	BnaA01g16400D	0.547438	0.872641	44.182	68.5149	UP	FALSE	FALSE	UP	RD26; NAC transcription factor RD26	sp|Q93VY3|NAC72_ARATH NAC domain-containing protein 72 OS=Arabidopsis thaliana GN=NAC072 PE=2 SV=1//7.6207e-177
	BnaA01g28710D	0.371963	0.347419	1.02522	0.644921	UP	FALSE	FALSE	UP	NAC2; NAC domain containing protein 2	sp|Q9LD44|NAC56_ARATH NAC transcription factor 56 OS=Arabidopsis thaliana GN=NAC056 PE=2 SV=1//0
	BnaA01g31650D	2.57325	2.64153	202.792	208.53	UP	FALSE	FALSE	UP	NAC053; NAC domain containing protein 53	sp|Q949N0|NAC53_ARATH NAC domain-containing protein 53 OS=Arabidopsis thaliana GN=NAC053 PE=2 SV=1//0
	BnaA01g31660D	1.41873	1.36046	4.52148	3.89273	UP	FALSE	FALSE	UP	NAC050; NAC domain containing protein 50	sp|Q84K00|NAC78_ARATH NAC domain-containing protein 78 OS=Arabidopsis thaliana GN=NAC078 PE=2 SV=2//1.83955e-77
	BnaA02g01460D	3.07537	2.75351	65.5751	65.0893	UP	FALSE	FALSE	UP	NAC083; NAC domain containing protein 83	sp|Q9FY93|NAC83_ARATH NAC domain-containing protein 83 OS=Arabidopsis thaliana GN=NAC083 PE=1 SV=1//6.47266e-131
	BnaA02g18390D	2.21589	1.75514	156.219	184.573	UP	FALSE	FALSE	UP	NAC032; NAC domain containing protein 32	sp|Q39013|NAC2_ARATH NAC domain-containing protein 2 OS=Arabidopsis thaliana GN=NAC002 PE=2 SV=2//6.67647e-109
	BnaA02g33910D	3.58995	3.81482	402.152	544.777	UP	FALSE	FALSE	UP	NAC102; NAC domain-containing protein 102	sp|Q8H115|NA102_ARATH NAC domain-containing protein 102 OS=Arabidopsis thaliana GN=NAC102 PE=1 SV=1//1.51471e-154
	BnaA03g01250D	7.65524	14.0179	49.3993	84.0176	UP	UP	UP	UP	NAC2; NAC family transcriptional activator	sp|Q84K00|NAC78_ARATH NAC domain-containing protein 78 OS=Arabidopsis thaliana GN=NAC078 PE=2 SV=2//0
	BnaA03g02640D	5.0736	8.68006	545.602	1401.29	UP	UP	UP	UP	ATAF2; protein ATAF2	sp|Q9C598|NAC81_ARATH Protein ATAF2 OS=Arabidopsis thaliana GN=NAC081 PE=1 SV=1//1.56577e-167
	BnaA03g02680D	2.57648	5.7375	1.80198	3.2552	FALSE	FALSE	UP	FALSE	NAC082; NAC domain containing protein 82	sp|Q9FY82|NAC82_ARATH NAC domain-containing protein 82 OS=Arabidopsis thaliana GN=NAC082 PE=1 SV=1//7.9706e-08
	BnaA03g04240D	5.11344	9.34552	190.073	424.164	UP	UP	FALSE	UP	NAC083; NAC domain containing protein 83	sp|Q9FY93|NAC83_ARATH NAC domain-containing protein 83 OS=Arabidopsis thaliana GN=NAC083 PE=1 SV=1//4.67178e-138
	BnaA03g27400D	1.66702	2.05599	31.471	29.6476	UP	FALSE	FALSE	UP	galactose mutarotase-like superfamily protein; K01792 glucose-6-phosphate 1-epimerase [EC:5.1.3.15]	sp|Q40784|AAPC_CENCI Putative glucose-6-phosphate 1-epimerase OS=Cenchrus ciliaris PE=2 SV=1//1.86793e-127
	BnaA03g31260D	0.560571	0.607203	3.12017	3.56824	UP	FALSE	FALSE	UP	NAC050; NAC domain containing protein 50	sp|Q84K00|NAC78_ARATH NAC domain-containing protein 78 OS=Arabidopsis thaliana GN=NAC078 PE=2 SV=2//8.19412e-67
	BnaA03g31270D	1.43958	1.6499	4.34398	3.48587	UP	FALSE	FALSE	UP	NAC050; NAC domain containing protein 50	sp|Q84K00|NAC78_ARATH NAC domain-containing protein 78 OS=Arabidopsis thaliana GN=NAC078 PE=2 SV=2//5.14978e-70
	BnaA03g48570D	1.2642	1.37366	104.559	125.633	UP	FALSE	FALSE	UP	RD26; NAC transcription factor RD26	sp|Q93VY3|NAC72_ARATH NAC domain-containing protein 72 OS=Arabidopsis thaliana GN=NAC072 PE=2 SV=1//0
	BnaA05g18430D	0.20768	0.10493	3.73904	5.71861	UP	FALSE	FALSE	UP	NAC016; NAC domain containing protein 16	sp|A4FVP6|NAC16_ARATH NAC domain-containing protein 16 OS=Arabidopsis thaliana GN=NAC016 PE=2 SV=1//0
	BnaA05g24050D	0.369131	0.678509	36.7471	74.5567	UP	UP	FALSE	UP	NAC3; ATAF-like NAC-domain transcription factor	sp|Q9LDY8|NAC55_ARATH NAC domain-containing protein 55 OS=Arabidopsis thaliana GN=NAC055 PE=2 SV=1//0
	BnaA05g28370D	5.47334	5.86383	36.9575	30.2571	UP	FALSE	FALSE	UP	NAC050; NAC domain containing protein 50	sp|Q84K00|NAC78_ARATH NAC domain-containing protein 78 OS=Arabidopsis thaliana GN=NAC078 PE=2 SV=2//6.21504e-77
	BnaA05g34370D	0.268782	0.238582	0.247298	1.73906	UP	UP	FALSE	FALSE	NAC042; NAC domain-containing protein 42	sp|Q9SK55|NAC42_ARATH Transcription factor JUNGBRUNNEN 1 OS=Arabidopsis thaliana GN=JUB1 PE=1 SV=1//2.14844e-168
	BnaA05g37400D	0.0165053	0.082461	2.52481	2.26579	UP	FALSE	FALSE	UP	NAC046; NAC domain containing protein 46	sp|Q9FLJ2|NC100_ARATH NAC domain-containing protein 100 OS=Arabidopsis thaliana GN=NAC100 PE=2 SV=1//8.7872e-89
	BnaA05g37410D	0.0697289	0.087014	42.6574	42.1669	UP	FALSE	FALSE	UP	NAC047; NAC domain containing protein 47	sp|Q8H4S4|NAC10_ORYSJ NAC transcription factor ONAC010 OS=Oryza sativa subsp. japonica GN=ONAC010 PE=2 SV=1//2.30708e-79
	BnaA06g15870D	8.04109	7.71602	51.2418	56.8356	UP	FALSE	FALSE	UP	NAC062; transcription factor NTL6	sp|Q9SCK6|NAC62_ARATH NAC domain-containing protein 62 OS=Arabidopsis thaliana GN=NAC062 PE=1 SV=1//0
	BnaA06g22900D	0.67911	0.553581	59.916	99.6991	UP	UP	FALSE	UP	NAC102; NAC domain-containing protein 102	sp|Q8H115|NA102_ARATH NAC domain-containing protein 102 OS=Arabidopsis thaliana GN=NAC102 PE=1 SV=1//1.95508e-132
	BnaA06g23510D	2.97152	3.21524	4.86218	4.99626	UP	FALSE	FALSE	UP	XND1; xylem NAC domain 1	sp|Q8GY42|NAC25_ARATH NAC transcription factor 25 OS=Arabidopsis thaliana GN=NAC025 PE=2 SV=1//1.27906e-25
	BnaA06g27060D	7.08556	8.37512	13.714	16.166	UP	FALSE	FALSE	UP	TIP; TCV-interacting protein	sp|Q9SCK6|NAC62_ARATH NAC domain-containing protein 62 OS=Arabidopsis thaliana GN=NAC062 PE=1 SV=1//4.41711e-153
	BnaA07g03200D	1.16368	0.488293	3.29022	3.05154	UP	FALSE	FALSE	UP	NAC036; NAC transcription factor family protein NAC036	sp|Q9SK55|NAC42_ARATH Transcription factor JUNGBRUNNEN 1 OS=Arabidopsis thaliana GN=JUB1 PE=1 SV=1//2.36349e-48
	BnaA07g05000D	11.7127	11.901	17.4347	19.3376	UP	FALSE	FALSE	UP	NAC100; NAC domain containing protein 100	sp|Q9FLJ2|NC100_ARATH NAC domain-containing protein 100 OS=Arabidopsis thaliana GN=NAC100 PE=2 SV=1//4.46481e-06
	BnaA07g10300D	0.830509	1.19106	265.047	274.025	UP	FALSE	FALSE	UP	NAC13; NAC domain protein 13	sp|F4IED2|NAC13_ARATH NAC domain-containing protein 13 OS=Arabidopsis thaliana GN=NAC13 PE=1 SV=1//5.01186e-167
	BnaA07g12690D	0.47373	0.436419	1.10409	0.655292	FALSE	FALSE	FALSE	UP	NAC105; NAC domain containing protein	sp|Q9FH59|NC105_ARATH NAC domain-containing protein 105 OS=Arabidopsis thaliana GN=NAC105 PE=1 SV=1//1.20338e-155
	BnaA07g15270D	0.372426	0.287289	0.257857	1.02327	UP	FALSE	FALSE	FALSE	NAC (No Apical Meristem) domain transcriptional regulator superfamily protein	sp|Q9C598|NAC81_ARATH Protein ATAF2 OS=Arabidopsis thaliana GN=NAC081 PE=1 SV=1//4.15356e-10
	BnaA07g24270D	0.864479	0.446831	26.0303	39.2092	UP	FALSE	FALSE	UP	NAP; NAC transcription factor protein family	sp|O49255|NAC29_ARATH NAC transcription factor 29 OS=Arabidopsis thaliana GN=NAC029 PE=2 SV=1//1.88184e-166
	BnaA07g28000D	0.785957	1.11374	35.1153	83.6162	UP	UP	FALSE	UP	NAP; NAC transcription factor protein family	sp|O49255|NAC29_ARATH NAC transcription factor 29 OS=Arabidopsis thaliana GN=NAC029 PE=2 SV=1//3.76273e-166
	BnaA08g06490D	2.53899	2.08486	5.00081	4.0218	UP	FALSE	FALSE	UP	NAC017; NAC domain containing protein 17	sp|Q9XIC5|NAC17_ARATH NAC domain-containing protein 17 OS=Arabidopsis thaliana GN=NAC017 PE=2 SV=1//2.61982e-136
	BnaA08g18520D	0.095414	0.0464791	13.9348	51.7769	UP	UP	FALSE	UP	NAC005; NAC domain-containing protein 5	sp|O81914|NAC5_ARATH NAC domain-containing protein 5 OS=Arabidopsis thaliana GN=NAC005 PE=2 SV=2//2.30087e-22
	BnaA09g00440D	0.00944393	0.0208442	2.45426	1.38415	UP	DOWN	FALSE	UP	NAC3; ATAF-like NAC-domain transcription factor	sp|Q9LDY8|NAC55_ARATH NAC domain-containing protein 55 OS=Arabidopsis thaliana GN=NAC055 PE=2 SV=1//6.32646e-12
	BnaA09g04810D	4.15161	4.25357	4.25588	5.4289	UP	FALSE	FALSE	UP	TIP; TCV-interacting protein	sp|Q9SCK6|NAC62_ARATH NAC domain-containing protein 62 OS=Arabidopsis thaliana GN=NAC062 PE=1 SV=1//2.25526e-161
	BnaA09g06870D	0.950932	1.81086	2.49486	3.59559	UP	FALSE	FALSE	UP	XND1; xylem NAC domain 1	sp|Q8GY42|NAC25_ARATH NAC transcription factor 25 OS=Arabidopsis thaliana GN=NAC025 PE=2 SV=1//2.92914e-25
	BnaA09g19070D	1.00105	0.845689	0.0272889	0.107454	DOWN	FALSE	FALSE	DOWN	NAC035; protein LONG VEGETATIVE PHASE 1	sp|Q9FIW5|NAC94_ARATH Putative NAC domain-containing protein 94 OS=Arabidopsis thaliana GN=ANAC094 PE=3 SV=1//3.19894e-57
	BnaA09g23230D	6.25159	6.71908	10.9616	10.6022	UP	FALSE	FALSE	UP	NAC017; NAC domain containing protein 17	sp|Q9XIC5|NAC17_ARATH NAC domain-containing protein 17 OS=Arabidopsis thaliana GN=NAC017 PE=2 SV=1//0
	BnaA09g51620D	0.469007	0.562785	39.6301	50.9783	UP	FALSE	FALSE	UP	NTM1; NAC with transmembrane motif1	sp|Q9M126|NAC69_ARATH NAC domain-containing protein 69 OS=Arabidopsis thaliana GN=NAC69 PE=2 SV=1//7.83478e-136
	BnaA10g00280D	18.6692	13.6757	199.536	248.922	UP	FALSE	FALSE	UP	ATAF1; putative transcriptional activator with NAC domain	sp|Q39013|NAC2_ARATH NAC domain-containing protein 2 OS=Arabidopsis thaliana GN=NAC002 PE=2 SV=2//0
	BnaA10g00890D	0.0475554	0.0236992	8.71187	7.2123	UP	FALSE	FALSE	UP	NAC005; NAC domain-containing protein 5	sp|O81914|NAC5_ARATH NAC domain-containing protein 5 OS=Arabidopsis thaliana GN=NAC005 PE=2 SV=2//2.83682e-82
	BnaA10g20110D	12.9472	10.3221	0.724722	1.63422	DOWN	FALSE	FALSE	DOWN	NAC083; NAC domain containing protein 83	sp|Q9FY93|NAC83_ARATH NAC domain-containing protein 83 OS=Arabidopsis thaliana GN=NAC083 PE=1 SV=1//1.84401e-135
	BnaA10g22680D	0.62641	0.942421	161.143	200.53	UP	FALSE	FALSE	UP	ATAF2; protein ATAF2	sp|Q9C598|NAC81_ARATH Protein ATAF2 OS=Arabidopsis thaliana GN=NAC081 PE=1 SV=1//9.04786e-179
	BnaA10g25760D	6.50248	6.28895	38.3126	34.1989	UP	FALSE	FALSE	UP	NAC2; NAC family transcriptional activator	sp|Q84K00|NAC78_ARATH NAC domain-containing protein 78 OS=Arabidopsis thaliana GN=NAC078 PE=2 SV=2//0
	BnaAnng05950D	11.9065	11.1448	1301.83	1508.09	UP	FALSE	FALSE	UP	ATAF2; protein ATAF2	sp|Q9C598|NAC81_ARATH Protein ATAF2 OS=Arabidopsis thaliana GN=NAC081 PE=1 SV=1//4.06863e-153
	BnaAnng07000D	2.43413	3.84204	0.163311	0.431614	DOWN	FALSE	FALSE	DOWN	NAC100; NAC domain containing protein 100	sp|Q9FLJ2|NC100_ARATH NAC domain-containing protein 100 OS=Arabidopsis thaliana GN=NAC100 PE=2 SV=1//0
	BnaC01g19550D	5.92183	5.82997	46.1526	49.7038	UP	FALSE	FALSE	UP	RD26; NAC transcription factor RD26	sp|Q93VY3|NAC72_ARATH NAC domain-containing protein 72 OS=Arabidopsis thaliana GN=NAC072 PE=2 SV=1//8.97828e-177
	BnaC01g23890D	1.14289	0.820879	22.2937	16.9633	UP	DOWN	FALSE	UP	NAC060; NAC domain containing protein 60	sp|Q9LXL9|NAC60_ARATH NAC domain-containing protein 60 OS=Arabidopsis thaliana GN=NAC60 PE=2 SV=1//0
	BnaC01g36040D	0.0550602	0.0543718	6.65954	8.9055	UP	FALSE	FALSE	UP	NAC3; ATAF-like NAC-domain transcription factor	sp|Q9LDY8|NAC55_ARATH NAC domain-containing protein 55 OS=Arabidopsis thaliana GN=NAC055 PE=2 SV=1//2.50779e-178
	BnaC02g00990D	0.0467173	0.0432573	2.96293	3.86498	UP	FALSE	FALSE	UP	ATAF2; protein ATAF2	sp|Q9C598|NAC81_ARATH Protein ATAF2 OS=Arabidopsis thaliana GN=NAC081 PE=1 SV=1//3.47722e-164
	BnaC02g04540D	14.6606	17.7649	210.138	220.278	UP	FALSE	FALSE	UP	NAC083; NAC domain containing protein 83	sp|Q9FY93|NAC83_ARATH NAC domain-containing protein 83 OS=Arabidopsis thaliana GN=NAC083 PE=1 SV=1//1.84467e-132
	BnaC02g42720D	4.75696	4.57954	342.67	440.377	UP	FALSE	FALSE	UP	NAC102; NAC domain-containing protein 102	sp|Q8H115|NA102_ARATH NAC domain-containing protein 102 OS=Arabidopsis thaliana GN=NAC102 PE=1 SV=1//9.81105e-160
	BnaC03g03740D	1.94743	0.718863	566.426	1.25253	FALSE	DOWN	FALSE	UP	ATAF2; protein ATAF2	sp|Q9C598|NAC81_ARATH Protein ATAF2 OS=Arabidopsis thaliana GN=NAC081 PE=1 SV=1//1.4918e-150
	BnaC03g32420D	2.27063	2.36535	9.00317	8.99209	UP	FALSE	FALSE	UP	galactose mutarotase-like superfamily protein; K01792 glucose-6-phosphate 1-epimerase [EC:5.1.3.15]	sp|Q40784|AAPC_CENCI Putative glucose-6-phosphate 1-epimerase OS=Cenchrus ciliaris PE=2 SV=1//1.2595e-126
	BnaC03g36600D	1.84574	2.27395	6.58223	5.2914	UP	FALSE	FALSE	UP	NAC050; NAC domain containing protein 50	sp|Q84K00|NAC78_ARATH NAC domain-containing protein 78 OS=Arabidopsis thaliana GN=NAC078 PE=2 SV=2//2.26051e-74
	BnaC03g36610D	1.55299	1.69795	20.0222	17.8235	UP	FALSE	FALSE	UP	NAC050; NAC domain containing protein 50	sp|Q84K00|NAC78_ARATH NAC domain-containing protein 78 OS=Arabidopsis thaliana GN=NAC078 PE=2 SV=2//1.43219e-68
	BnaC03g50570D	2.25323	2.40356	312.56	370.2	UP	FALSE	FALSE	UP	NAC102; NAC domain-containing protein 102	sp|Q8H115|NA102_ARATH NAC domain-containing protein 102 OS=Arabidopsis thaliana GN=NAC102 PE=1 SV=1//7.64961e-138
	BnaC03g52400D	3.14126	2.75088	8.89962	12.768	UP	FALSE	FALSE	UP	NAC062; transcription factor NTL6	sp|Q9SCK6|NAC62_ARATH NAC domain-containing protein 62 OS=Arabidopsis thaliana GN=NAC062 PE=1 SV=1//2.66636e-138
	BnaC03g58370D	2.24778	1.42956	8.44096	4.87771	UP	DOWN	FALSE	UP	NAC005; NAC domain-containing protein 5	sp|O81914|NAC5_ARATH NAC domain-containing protein 5 OS=Arabidopsis thaliana GN=NAC005 PE=2 SV=2//8.54587e-34
	BnaC03g71220D	4.23343	0.402538	27.4892	2.39825	UP	DOWN	DOWN	UP	NAC2; NAC family transcriptional activator	sp|Q84K00|NAC78_ARATH NAC domain-containing protein 78 OS=Arabidopsis thaliana GN=NAC078 PE=2 SV=2//0
	BnaC05g00370D	16.6614	15.619	131.734	147.612	UP	FALSE	FALSE	UP	ATAF1; putative transcriptional activator with NAC domain	sp|Q39013|NAC2_ARATH NAC domain-containing protein 2 OS=Arabidopsis thaliana GN=NAC002 PE=2 SV=2//0
	BnaC05g00940D	0.36483	0.376197	0.793156	1.18573	UP	FALSE	FALSE	UP	NAC001; NAC domain-containing protein 1	sp|Q0WV96|NAC1_ARATH NAC domain-containing protein 1 OS=Arabidopsis thaliana GN=NAC001 PE=2 SV=2//1.57579e-113
	BnaC05g01000D	0.672472	0.666611	16.753	20.8085	UP	FALSE	FALSE	UP	NAC005; NAC domain-containing protein 5	sp|O81914|NAC5_ARATH NAC domain-containing protein 5 OS=Arabidopsis thaliana GN=NAC005 PE=2 SV=2//8.95256e-85
	BnaC05g20530D	6.42027	6.36021	10.853	10.3549	UP	FALSE	FALSE	UP	SOG1; suppressor of gamma response 1	sp|Q6NQK2|NAC8_ARATH NAC domain-containing protein 8 OS=Arabidopsis thaliana GN=NAC008 PE=2 SV=1//0
	BnaC05g28020D	0.145712	0.122277	3.30924	4.44243	UP	FALSE	FALSE	UP	NAC016; NAC domain containing protein 16	sp|A4FVP6|NAC16_ARATH NAC domain-containing protein 16 OS=Arabidopsis thaliana GN=NAC016 PE=2 SV=1//0
	BnaC05g38130D	1.91965	1.52974	2.42163	2.24642	UP	FALSE	FALSE	UP	NAC2; NAC domain containing protein 2	sp|Q9LD44|NAC56_ARATH NAC transcription factor 56 OS=Arabidopsis thaliana GN=NAC056 PE=2 SV=1//0
	BnaC05g38150D	0.344898	0.434312	32.0509	67.8878	UP	UP	FALSE	UP	NAC3; ATAF-like NAC-domain transcription factor	sp|Q9LDY8|NAC55_ARATH NAC domain-containing protein 55 OS=Arabidopsis thaliana GN=NAC055 PE=2 SV=1//0
	BnaC05g42540D	5.82224	6.40209	28.9224	24.256	UP	FALSE	FALSE	UP	NAC050; NAC domain containing protein 50	sp|Q84K00|NAC78_ARATH NAC domain-containing protein 78 OS=Arabidopsis thaliana GN=NAC078 PE=2 SV=2//9.93272e-78
	BnaC06g05930D	0.0808332	0.0729686	12.7254	12.1495	UP	FALSE	FALSE	UP	NAC019; NAC domain-containing protein 19	sp|Q9C932|NAC19_ARATH NAC domain-containing protein 19 OS=Arabidopsis thaliana GN=NAC019 PE=1 SV=1//2.62373e-105
	BnaC06g12550D	0.022868	0.0184354	2.53399	3.61853	UP	FALSE	FALSE	UP	NAC6; NAC-domain transcription factor	sp|Q9FKA0|NAC92_ARATH NAC domain-containing protein 92 OS=Arabidopsis thaliana GN=NAC92 PE=1 SV=1//3.59963e-171
	BnaC06g30680D	1.81899	2.14096	56.8064	84.6617	UP	FALSE	FALSE	UP	NAP; NAC transcription factor protein family	sp|O49255|NAC29_ARATH NAC transcription factor 29 OS=Arabidopsis thaliana GN=NAC029 PE=2 SV=1//2.17839e-166
	BnaC07g13550D	1.35526	1.83544	442.26	394.881	UP	FALSE	FALSE	UP	NAC13; NAC domain protein 13	sp|F4IED2|NAC13_ARATH NAC domain-containing protein 13 OS=Arabidopsis thaliana GN=NAC13 PE=1 SV=1//3.22384e-168
	BnaC07g40860D	3.33983	2.87574	148.811	190.226	UP	FALSE	FALSE	UP	RD26; NAC transcription factor RD26	sp|Q93VY3|NAC72_ARATH NAC domain-containing protein 72 OS=Arabidopsis thaliana GN=NAC072 PE=2 SV=1//4.85099e-178
	BnaC08g07040D	3.83102	4.1282	5.99109	5.72417	UP	FALSE	FALSE	UP	NAC017; NAC domain containing protein 17	sp|Q9XIC5|NAC17_ARATH NAC domain-containing protein 17 OS=Arabidopsis thaliana GN=NAC017 PE=2 SV=1//0
	BnaC08g21160D	2.62751	2.74743	23.1888	24.9937	UP	FALSE	FALSE	UP	NAC062; transcription factor NTL6	sp|Q9SCK6|NAC62_ARATH NAC domain-containing protein 62 OS=Arabidopsis thaliana GN=NAC062 PE=1 SV=1//0
	BnaC08g37790D	20.1829	19.8003	35.9567	32.1966	UP	FALSE	FALSE	UP	UBP1B; oligouridylate binding protein 1B; K13201 nucleolysin TIA-1/TIAR	sp|Q9LQI9|UBP1B_ARATH Oligouridylate-binding protein 1B OS=Arabidopsis thaliana GN=UBP1B PE=1 SV=1//0
	BnaC09g04330D	2.62535	3.06617	4.45293	4.59848	UP	FALSE	FALSE	UP	TIP; TCV-interacting protein	sp|Q9SCK6|NAC62_ARATH NAC domain-containing protein 62 OS=Arabidopsis thaliana GN=NAC062 PE=1 SV=1//3.56196e-154
	BnaC09g09210D	0.997816	0.513665	2.60315	2.28579	UP	FALSE	FALSE	UP	NAC036; NAC transcription factor family protein NAC036	sp|Q9FIW5|NAC94_ARATH Putative NAC domain-containing protein 94 OS=Arabidopsis thaliana GN=ANAC094 PE=3 SV=1//3.42911e-51
	BnaC09g43200D	2.01173	4.42985	0.95294	3.2335	FALSE	UP	FALSE	FALSE	NAC084; NAC domain containing protein 84	sp|Q9FY93|NAC83_ARATH NAC domain-containing protein 83 OS=Arabidopsis thaliana GN=NAC083 PE=1 SV=1//1.59723e-22
	BnaC09g47250D	3.98502	3.76783	425.479	480.431	UP	FALSE	FALSE	UP	ATAF2; protein ATAF2	sp|Q9C598|NAC81_ARATH Protein ATAF2 OS=Arabidopsis thaliana GN=NAC081 PE=1 SV=1//8.70023e-178
	BnaC09g50530D	4.21367	4.95893	54.4975	40.1265	UP	DOWN	FALSE	UP	NAC2; NAC family transcriptional activator	sp|Q84K00|NAC78_ARATH NAC domain-containing protein 78 OS=Arabidopsis thaliana GN=NAC078 PE=2 SV=2//0
	BnaCnng09850D	3.89817	3.71598	262.371	345.987	UP	FALSE	FALSE	UP	NAC032; NAC domain containing protein 32	sp|Q39013|NAC2_ARATH NAC domain-containing protein 2 OS=Arabidopsis thaliana GN=NAC002 PE=2 SV=2//2.3638e-107
	BnaCnng30350D	2.3349	2.26176	2.54507	2.83364	UP	FALSE	FALSE	FALSE	NAC2; NAC domain containing protein 2	sp|Q9LD44|NAC56_ARATH NAC transcription factor 56 OS=Arabidopsis thaliana GN=NAC056 PE=2 SV=1//0
OFP(3)	BnaA09g50350D	1.63924	1.76021	0.0240543	0.0507079	DOWN	FALSE	FALSE	DOWN	OFP12; ovate family protein 12	sp|F4I8R6|OFP12_ARATH Transcription repressor OFP12 OS=Arabidopsis thaliana GN=OFP12 PE=1 SV=1//6.30409e-59
	BnaC01g11320D	1.56754	1.36893	6.29326	4.64973	UP	FALSE	FALSE	UP	OFP5; ovate family protein 5	sp|Q8VZN1|OFP5_ARATH Transcription repressor OFP5 OS=Arabidopsis thaliana GN=OFP5 PE=1 SV=1//0
	BnaCnng33780D	3.84181	3.12118	6.94275	5.7118	UP	FALSE	FALSE	UP	OFP14; ovate family protein 14	sp|Q9S7T5|OFP14_ARATH Transcription repressor OFP14 OS=Arabidopsis thaliana GN=OFP14 PE=1 SV=1//5.29544e-121
Orphans(50)	BnaA01g15160D	0.253419	0.55465	4.11952	4.87171	UP	FALSE	FALSE	UP	CIL; CIA2-like transcription factor	sp|Q9LU68|CIA2_ARATH Protein CHLOROPLAST IMPORT APPARATUS 2 OS=Arabidopsis thaliana GN=CIA2 PE=2 SV=1//2.27722e-106
	BnaA01g18680D	1.87402	1.86181	15.4191	7.35081	UP	DOWN	FALSE	UP	B-box type zinc finger-containing protein	sp|Q9LJB7|BBX32_ARATH B-box zinc finger protein 32 OS=Arabidopsis thaliana GN=BBX32 PE=1 SV=1//2.45015e-14
	BnaA02g09600D	1.51594	1.69476	27.4745	23.2977	UP	FALSE	FALSE	UP	B-box type zinc finger-containing protein	sp|Q9LJB7|BBX32_ARATH B-box zinc finger protein 32 OS=Arabidopsis thaliana GN=BBX32 PE=1 SV=1//6.3104e-07
	BnaA03g04870D	0.987931	2.79676	0.117084	0.295429	DOWN	FALSE	UP	DOWN	CCT motif family protein	sp|Q9LU68|CIA2_ARATH Protein CHLOROPLAST IMPORT APPARATUS 2 OS=Arabidopsis thaliana GN=CIA2 PE=2 SV=1//1.00286e-19
	BnaA03g37960D	3.61768	3.72811	9.13917	7.43655	UP	FALSE	FALSE	UP	HK2; histidine kinase 2; K14489 arabidopsis histidine kinase 2/3/4 (cytokinin receptor) [EC:2.7.13.3]	sp|Q9C5U2|AHK2_ARATH Histidine kinase 2 OS=Arabidopsis thaliana GN=AHK2 PE=1 SV=1//5.3772e-07
	BnaA06g06230D	0.510924	0.544913	1.49866	1.23973	UP	FALSE	FALSE	UP	SNL6; paired amphipathic helix protein Sin3-like 6; K11644 paired amphipathic helix protein Sin3a	sp|Q9XIK6|SNL6_ARATH Paired amphipathic helix protein Sin3-like 6 OS=Arabidopsis thaliana GN=SNL6 PE=3 SV=2//8.0399e-152
	BnaA06g06240D	27.6939	20.1856	29.2192	29.6218	UP	FALSE	FALSE	UP	ARR4; two-component response regulator ARR4; K14492 two-component response regulator ARR-A family	sp|O82798|ARR4_ARATH Two-component response regulator ARR4 OS=Arabidopsis thaliana GN=ARR4 PE=1 SV=1//3.06055e-112
	BnaA06g13210D	3.00388	2.76199	0.0796706	0.311174	DOWN	FALSE	FALSE	DOWN	ARR7; two-component response regulator ARR7; K14492 two-component response regulator ARR-A family	sp|Q9ZWS7|ARR7_ARATH Two-component response regulator ARR7 OS=Arabidopsis thaliana GN=ARR7 PE=1 SV=1//5.5223e-112
	BnaA06g13370D	3.24114	3.02932	8.26191	6.64394	UP	FALSE	FALSE	UP	DA1; protein DA1	sp|P0C7Q8|DA1_ARATH Protein DA1 OS=Arabidopsis thaliana GN=DA1 PE=1 SV=1//0
	BnaA06g22370D	4.19848	3.72368	0.0584355	0.134745	DOWN	FALSE	FALSE	DOWN	ARR6; two-component response regulator ARR6; K14492 two-component response regulator ARR-A family	sp|Q9ZWS6|ARR6_ARATH Two-component response regulator ARR6 OS=Arabidopsis thaliana GN=ARR6 PE=1 SV=2//6.71727e-111
	BnaA07g08880D	10.8014	10.6752	17.3174	14.1127	UP	FALSE	FALSE	UP	HK3; histidine kinase 3; K14489 arabidopsis histidine kinase 2/3/4 (cytokinin receptor) [EC:2.7.13.3]	sp|Q9C5U1|AHK3_ARATH Histidine kinase 3 OS=Arabidopsis thaliana GN=AHK3 PE=1 SV=1//0
	BnaA07g12430D	0.464989	0.377009	1.04203	1.13156	UP	FALSE	FALSE	UP	DAR6; protein DA1-related 6	sp|Q9FJX8|DAR6_ARATH Protein DA1-related 6 OS=Arabidopsis thaliana GN=DAR6 PE=2 SV=1//0
	BnaA07g24620D	66.452	55.3637	0.226878	0.51393	DOWN	FALSE	FALSE	DOWN	zinc finger protein CONSTANS-LIKE 6	sp|Q8LG76|COL6_ARATH Zinc finger protein CONSTANS-LIKE 6 OS=Arabidopsis thaliana GN=COL6 PE=2 SV=2//1.34345e-34
	BnaA07g34250D	1.04681	0.684142	1.98091	3.12723	UP	FALSE	FALSE	UP	LZF1; light-regulated zinc finger protein 1	sp|Q9SYM2|BBX22_ARATH B-box zinc finger protein 22 OS=Arabidopsis thaliana GN=BBX22 PE=1 SV=2//1.08327e-129
	BnaA08g16830D	0.408024	0.580851	0.929807	1.22369	UP	FALSE	FALSE	UP	B-box type zinc finger-containing protein	sp|C0SVM5|BBX19_ARATH B-box zinc finger protein 19 OS=Arabidopsis thaliana GN=BBX19 PE=2 SV=1//8.55749e-121
	BnaA08g25770D	10.7792	9.03868	0.0480574	0.216712	DOWN	FALSE	FALSE	DOWN	ARR4; two-component response regulator ARR4; K14492 two-component response regulator ARR-A family	sp|O82798|ARR4_ARATH Two-component response regulator ARR4 OS=Arabidopsis thaliana GN=ARR4 PE=1 SV=1//8.42679e-108
	BnaA08g28420D	8.15871	8.73059	29.8181	23.5744	UP	FALSE	FALSE	UP	STO; salt tolerance protein	sp|Q96288|BBX24_ARATH B-box zinc finger protein 24 OS=Arabidopsis thaliana GN=BBX24 PE=1 SV=1//2.9848e-141
	BnaA08g28810D	29.2924	27.4403	0.150541	0.344664	DOWN	FALSE	FALSE	DOWN	CCT motif family protein	sp|Q9LU68|CIA2_ARATH Protein CHLOROPLAST IMPORT APPARATUS 2 OS=Arabidopsis thaliana GN=CIA2 PE=2 SV=1//2.36881e-19
	BnaA09g36380D	3.88287	4.35499	0.0248453	0.0702293	DOWN	FALSE	FALSE	DOWN	ARR9; two-component response regulator ARR9; K14492 two-component response regulator ARR-A family	sp|O80366|ARR9_ARATH Two-component response regulator ARR9 OS=Arabidopsis thaliana GN=ARR9 PE=1 SV=1//1.03321e-114
	BnaA10g08290D	1.10718	1.27307	4.41083	5.5749	UP	FALSE	FALSE	UP	B-box type zinc finger-containing protein	sp|Q9LJB7|BBX32_ARATH B-box zinc finger protein 32 OS=Arabidopsis thaliana GN=BBX32 PE=1 SV=1//1.26067e-07
	BnaA10g11220D	9.32145	31.3444	0.203028	0.718234	DOWN	FALSE	UP	DOWN	CIL; CIA2-like transcription factor	sp|Q9LU68|CIA2_ARATH Protein CHLOROPLAST IMPORT APPARATUS 2 OS=Arabidopsis thaliana GN=CIA2 PE=2 SV=1//6.50382e-131
	BnaAnng28480D	1.31008	1.0666	9.09286	16.9949	UP	UP	FALSE	UP	zinc finger protein CONSTANS-LIKE 14	sp|O22800|COL14_ARATH Zinc finger protein CONSTANS-LIKE 14 OS=Arabidopsis thaliana GN=COL14 PE=2 SV=2//2.58039e-129
	BnaAnng29690D	1.56174	1.42903	7.45315	9.51579	UP	FALSE	FALSE	UP	LZF1; light-regulated zinc finger protein 1	sp|Q9SYM2|BBX22_ARATH B-box zinc finger protein 22 OS=Arabidopsis thaliana GN=BBX22 PE=1 SV=2//8.71864e-121
	BnaAnng41010D	0.640082	0.573307	2.01338	5.2954	UP	UP	FALSE	UP	JAZ3; jasmonate-zim-domain protein 3; K13464 jasmonate ZIM domain-containing protein	sp|Q9LVI4|TIF6B_ARATH Protein TIFY 6B OS=Arabidopsis thaliana GN=TIFY6B PE=1 SV=1//7.6272e-69
	BnaC01g17920D	1.63007	3.00536	4.38288	4.11079	UP	FALSE	FALSE	UP	CIL; CIA2-like transcription factor	sp|Q9LU68|CIA2_ARATH Protein CHLOROPLAST IMPORT APPARATUS 2 OS=Arabidopsis thaliana GN=CIA2 PE=2 SV=1//1.69367e-100
	BnaC01g34620D	0.545322	0.964926	0.934245	1.55203	UP	FALSE	FALSE	FALSE	JAZ3; jasmonate-zim-domain protein 3; K13464 jasmonate ZIM domain-containing protein	sp|Q9LVI4|TIF6B_ARATH Protein TIFY 6B OS=Arabidopsis thaliana GN=TIFY6B PE=1 SV=1//4.43269e-63
	BnaC01g42110D	0.728805	0.803881	4.45054	2.61532	UP	FALSE	FALSE	UP	B-box type zinc finger-containing protein	sp|Q9LJB7|BBX32_ARATH B-box zinc finger protein 32 OS=Arabidopsis thaliana GN=BBX32 PE=1 SV=1//1.41925e-14
	BnaC02g25060D	1.17787	1.34722	1.82895	1.94335	UP	FALSE	FALSE	UP	LZF1; light-regulated zinc finger protein 1	sp|Q9SYM2|BBX22_ARATH B-box zinc finger protein 22 OS=Arabidopsis thaliana GN=BBX22 PE=1 SV=2//9.62243e-140
	BnaC03g32910D	0.588956	1.09293	0.0266519	0.200606	FALSE	FALSE	FALSE	DOWN	COL2; zinc finger protein CONSTANS-LIKE 2	sp|Q96502|COL2_ARATH Zinc finger protein CONSTANS-LIKE 2 OS=Arabidopsis thaliana GN=COL2 PE=1 SV=1//3.23093e-85
	BnaC03g44990D	4.77601	4.43411	9.6805	6.70689	UP	DOWN	FALSE	UP	HK2; histidine kinase 2; K14489 arabidopsis histidine kinase 2/3/4 (cytokinin receptor) [EC:2.7.13.3]	sp|Q9C5U2|AHK2_ARATH Histidine kinase 2 OS=Arabidopsis thaliana GN=AHK2 PE=1 SV=1//1.92793e-08
	BnaC03g60270D	0.771256	0.488479	1.54401	1.78033	UP	FALSE	FALSE	UP	B-box type zinc finger-containing protein	sp|C0SVM5|BBX19_ARATH B-box zinc finger protein 19 OS=Arabidopsis thaliana GN=BBX19 PE=2 SV=1//1.39476e-121
	BnaC04g42410D	6.2703	7.19416	1.1543	2.58458	DOWN	FALSE	FALSE	DOWN	STH; B-box zinc finger protein STH	sp|Q9SID1|BBX25_ARATH B-box zinc finger protein 25 OS=Arabidopsis thaliana GN=BBX25 PE=1 SV=2//9.73716e-151
	BnaC04g47580D	1.13414	2.11875	0.0250251	0.18412	DOWN	FALSE	FALSE	DOWN	RR3; response regulator 3; K14492 two-component response regulator ARR-A family	sp|O80365|ARR8_ARATH Two-component response regulator ARR8 OS=Arabidopsis thaliana GN=ARR8 PE=1 SV=1//1.5741e-119
	BnaC05g07980D	0.347437	0.419052	1.37088	1.10339	UP	FALSE	FALSE	UP	SNL6; paired amphipathic helix protein Sin3-like 6; K11644 paired amphipathic helix protein Sin3a	sp|Q9XIK6|SNL6_ARATH Paired amphipathic helix protein Sin3-like 6 OS=Arabidopsis thaliana GN=SNL6 PE=3 SV=2//1.21163e-136
	BnaC05g14720D	1.32023	1.45157	0.109119	0.407745	FALSE	FALSE	FALSE	DOWN	ARR7; two-component response regulator ARR7; K14492 two-component response regulator ARR-A family	sp|Q9ZWS7|ARR7_ARATH Two-component response regulator ARR7 OS=Arabidopsis thaliana GN=ARR7 PE=1 SV=1//3.0784e-110
	BnaC05g14930D	2.88386	3.60052	6.87152	6.62416	UP	FALSE	FALSE	UP	DA1; protein DA1	sp|P0C7Q8|DA1_ARATH Protein DA1 OS=Arabidopsis thaliana GN=DA1 PE=1 SV=1//0
	BnaC06g20350D	4.97935	3.34793	16.7717	26.1186	UP	UP	FALSE	UP	LZF1; light-regulated zinc finger protein 1	sp|Q9SYM2|BBX22_ARATH B-box zinc finger protein 22 OS=Arabidopsis thaliana GN=BBX22 PE=1 SV=2//6.00122e-129
	BnaC06g22310D	4.89232	5.31377	14.3251	13.242	UP	FALSE	FALSE	UP	STH2; B-box zinc finger transcription factor BBX21	sp|Q9LQZ7|BBX21_ARATH B-box zinc finger protein 21 OS=Arabidopsis thaliana GN=BBX21 PE=1 SV=1//7.46513e-152
	BnaC06g35700D	1.73688	1.47894	0.0342882	0.169553	DOWN	FALSE	FALSE	DOWN	ARR15; two-component response regulator ARR15; K14492 two-component response regulator ARR-A family	sp|Q7G8V2|ARR15_ARATH Two-component response regulator ARR15 OS=Arabidopsis thaliana GN=ARR15 PE=1 SV=1//4.7551e-73
	BnaC06g39020D	0.308722	0.222843	0.630323	1.09546	UP	FALSE	FALSE	UP	LZF1; light-regulated zinc finger protein 1	sp|Q9SYM2|BBX22_ARATH B-box zinc finger protein 22 OS=Arabidopsis thaliana GN=BBX22 PE=1 SV=2//1.19648e-139
	BnaC08g18570D	4.59953	5.1501	0.0785999	0.178171	DOWN	FALSE	FALSE	DOWN	ARR7; two-component response regulator ARR7; K14492 two-component response regulator ARR-A family	sp|Q9ZWS7|ARR7_ARATH Two-component response regulator ARR7 OS=Arabidopsis thaliana GN=ARR7 PE=1 SV=1//6.11386e-110
	BnaC08g18690D	0.695896	0.93826	1.06544	2.50719	UP	UP	FALSE	UP	DA1; protein DA1	sp|P0C7Q8|DA1_ARATH Protein DA1 OS=Arabidopsis thaliana GN=DA1 PE=1 SV=1//0
	BnaC09g30830D	0.281816	0.0310124	2.97419	2.80782	UP	FALSE	FALSE	UP	B-box type zinc finger-containing protein	sp|Q9SK53|COL3_ARATH Zinc finger protein CONSTANS-LIKE 3 OS=Arabidopsis thaliana GN=COL3 PE=1 SV=1//7.5146e-08
	BnaC09g53340D	45.9483	53.0477	0.466298	1.38056	DOWN	UP	FALSE	DOWN	CIL; CIA2-like transcription factor	sp|Q9LU68|CIA2_ARATH Protein CHLOROPLAST IMPORT APPARATUS 2 OS=Arabidopsis thaliana GN=CIA2 PE=2 SV=1//2.83183e-122
	BnaCnng16410D	1.30627	1.56698	1.75494	4.57482	UP	UP	FALSE	UP	B-box type zinc finger protein 13	sp|Q9C7E8|COL15_ARATH Zinc finger protein CONSTANS-LIKE 15 OS=Arabidopsis thaliana GN=COL15 PE=2 SV=1//6.35628e-98
	BnaCnng26450D	4.31256	4.11728	6.92902	6.30622	UP	FALSE	FALSE	UP	DAR6; protein DA1-related 6	sp|Q9FJX8|DAR6_ARATH Protein DA1-related 6 OS=Arabidopsis thaliana GN=DAR6 PE=2 SV=1//0
	BnaCnng26470D	0.561868	0.81113	1.90129	3.00375	UP	FALSE	FALSE	UP	DAR5; DA1-related protein 5	sp|Q84WJ0|DAR5_ARATH Protein DA1-related 5 OS=Arabidopsis thaliana GN=DAR5 PE=2 SV=2//0
	BnaCnng27490D	1.05349	1.31728	7.38982	10.486	UP	FALSE	FALSE	UP	RR1; response regulator 1; K14491 two-component response regulator ARR-B family	sp|Q940D0|ARR1_ARATH Two-component response regulator ARR1 OS=Arabidopsis thaliana GN=ARR1 PE=1 SV=2//6.65827e-85
	BnaCnng49440D	9.95582	7.40433	9.60754	11.5593	UP	FALSE	FALSE	UP	ARR4; two-component response regulator ARR4; K14492 two-component response regulator ARR-A family	sp|O82798|ARR4_ARATH Two-component response regulator ARR4 OS=Arabidopsis thaliana GN=ARR4 PE=1 SV=1//5.19356e-116
	BnaCnng67000D	1.38932	0.454007	2.6101	2.74634	UP	FALSE	FALSE	FALSE	RR5; two-component response regulator ARR5; K14492 two-component response regulator ARR-A family	sp|Q9SB04|ARR5_ARATH Two-component response regulator ARR5 OS=Arabidopsis thaliana GN=ARR5 PE=1 SV=2//1.27027e-120
PHD(17)	BnaA02g06350D	10.5748	10.3033	20.9383	15.7024	UP	DOWN	FALSE	UP	SIZ1; E3 SUMO-protein ligase SIZ1	sp|Q680Q4|SIZ1_ARATH E3 SUMO-protein ligase SIZ1 OS=Arabidopsis thaliana GN=SIZ1 PE=1 SV=2//0
	BnaA03g29120D	6.64141	6.92156	10.0636	9.16129	UP	FALSE	FALSE	UP	RING/U-box protein	sp|Q9V8P9|TOPRS_DROME E3 ubiquitin-protein ligase Topors OS=Drosophila melanogaster GN=Topors PE=1 SV=1//5.22742e-09
	BnaA04g21480D	7.25976	8.0129	27.6131	24.3263	UP	FALSE	FALSE	UP	acyl-CoA N-acyltransferase with RING/FYVE/PHD-type zinc finger domain-containing protein	sp|F4IXE7|IDM1_ARATH Increased DNA methylation 1 OS=Arabidopsis thaliana GN=IDM1 PE=1 SV=1//5.77198e-32
	BnaA06g26870D	1.15753	1.67804	0.0492761	0.198842	DOWN	FALSE	FALSE	DOWN	ATXR6; histone-lysine N-methyltransferase ATXR6	sp|Q9FNE9|ATXR6_ARATH Histone-lysine N-methyltransferase ATXR6 OS=Arabidopsis thaliana GN=ATXR6 PE=1 SV=1//0
	BnaA06g38840D	2.83176	2.16639	7.4767	4.74907	UP	DOWN	FALSE	UP	SIZ1; E3 SUMO-protein ligase SIZ1	sp|Q680Q4|SIZ1_ARATH E3 SUMO-protein ligase SIZ1 OS=Arabidopsis thaliana GN=SIZ1 PE=1 SV=2//1.13808e-07
	BnaA07g33420D	4.33618	4.54961	15.6025	14.1481	UP	FALSE	FALSE	UP	RING/FYVE/PHD zinc finger-containing protein	sp|Q6PDK2|KMT2D_MOUSE Histone-lysine N-methyltransferase 2D OS=Mus musculus GN=Kmt2d PE=1 SV=2//8.82718e-12
	BnaA08g16730D	8.97018	10.4149	9.39078	13.4751	UP	FALSE	FALSE	UP	SHL1; putative transcription factor SHL1	sp|Q3UHR0|BAHC1_MOUSE BAH and coiled-coil domain-containing protein 1 OS=Mus musculus GN=Bahcc1 PE=2 SV=2//3.40172e-09
	BnaA10g03550D	3.37146	3.4866	7.5602	4.71883	UP	DOWN	FALSE	UP	Acyl-CoA N-acyltransferase with RING/FYVE/PHD-type zinc finger protein	sp|F4IXE7|IDM1_ARATH Increased DNA methylation 1 OS=Arabidopsis thaliana GN=IDM1 PE=1 SV=1//2.99885e-91
	BnaA10g29450D	2.51266	2.6403	9.77586	3.68573	UP	DOWN	FALSE	UP	putative PHD finger transcription factor	sp|Q9LUZ6|TBL44_ARATH Protein PMR5 OS=Arabidopsis thaliana GN=PMR5 PE=2 SV=1//0
	BnaC03g07890D	2.4165	0.00966204	2.07179	0.0193448	FALSE	DOWN	DOWN	FALSE	RING/FYVE/PHD zinc finger-containing protein	sp|Q8UVR5|BAZ1A_XENLA Bromodomain adjacent to zinc finger domain protein 1A (Fragment) OS=Xenopus laevis GN=baz1a PE=2 SV=1//1.26663e-07
	BnaC03g55290D	9.55634	9.47589	24.8643	19.112	UP	DOWN	FALSE	UP	SIZ1; E3 SUMO-protein ligase SIZ1	sp|Q680Q4|SIZ1_ARATH E3 SUMO-protein ligase SIZ1 OS=Arabidopsis thaliana GN=SIZ1 PE=1 SV=2//0
	BnaC04g45230D	4.70475	4.61557	11.5488	9.9773	UP	FALSE	FALSE	UP	acyl-CoA N-acyltransferase with RING/FYVE/PHD-type zinc finger domain-containing protein	sp|F4IXE7|IDM1_ARATH Increased DNA methylation 1 OS=Arabidopsis thaliana GN=IDM1 PE=1 SV=1//1.27271e-31
	BnaC05g03470D	5.18436	5.24149	20.2783	14.4472	UP	DOWN	FALSE	UP	Acyl-CoA N-acyltransferase with RING/FYVE/PHD-type zinc finger protein	sp|F4IXE7|IDM1_ARATH Increased DNA methylation 1 OS=Arabidopsis thaliana GN=IDM1 PE=1 SV=1//1.81096e-91
	BnaC05g19100D	7.24497	8.27281	14.189	12.6981	UP	FALSE	FALSE	UP	RING/U-box protein	sp|Q9V8P9|TOPRS_DROME E3 ubiquitin-protein ligase Topors OS=Drosophila melanogaster GN=Topors PE=1 SV=1//6.98442e-09
	BnaC06g37970D	2.82732	2.98089	4.30383	4.36056	UP	FALSE	FALSE	UP	RING/FYVE/PHD zinc finger-containing protein	sp|Q6PDK2|KMT2D_MOUSE Histone-lysine N-methyltransferase 2D OS=Mus musculus GN=Kmt2d PE=1 SV=2//7.99004e-12
	BnaC09g46870D	1.57394	1.39715	1.36229	1.90592	UP	FALSE	FALSE	FALSE	ATXR5; histone-lysine N-methyltransferase ATXR5	sp|Q8VZJ1|ATXR5_ARATH Histone-lysine N-methyltransferase ATXR5 OS=Arabidopsis thaliana GN=ATXR5 PE=1 SV=2//0
	BnaCnng38760D	5.17228	5.58778	10.3165	10.9315	UP	FALSE	FALSE	UP	SIZ1; E3 SUMO-protein ligase SIZ1	sp|Q680Q4|SIZ1_ARATH E3 SUMO-protein ligase SIZ1 OS=Arabidopsis thaliana GN=SIZ1 PE=1 SV=2//0
PLATZ(17)	BnaA01g08770D	1.26853	1.6766	38.7007	43.6851	UP	FALSE	FALSE	UP	PLATZ transcription factor family protein	-//-
	BnaA03g43440D	3.01715	2.23283	24.1287	29.8491	UP	FALSE	FALSE	UP	PLATZ transcription factor family protein	-//-
	BnaA06g14840D	7.72591	6.2715	201.099	229.242	UP	FALSE	FALSE	UP	PLATZ transcription factor family protein	-//-
	BnaA06g40180D	2.24345	1.55664	35.3608	41.7097	UP	FALSE	FALSE	UP	PLATZ transcription factor family protein	-//-
	BnaA07g11130D	0.196146	0.377262	5.95833	7.45137	UP	FALSE	FALSE	UP	PLATZ transcription factor family protein	-//-
	BnaA07g32900D	0.388237	0.398827	8.57636	11.9315	UP	FALSE	FALSE	UP	PLATZ transcription factor family protein	-//-
	BnaA08g21530D	0.108924	0.0858616	14.2675	10.8664	UP	FALSE	FALSE	UP	PLATZ transcription factor family protein	-//-
	BnaA09g18140D	0.2264	0.652412	2.01564	1.91834	UP	FALSE	FALSE	UP	PLATZ transcription factor family protein	-//-
	BnaC01g10450D	3.93316	3.27442	68.9485	63.8475	UP	FALSE	FALSE	UP	PLATZ transcription factor family protein	-//-
	BnaC05g16290D	3.23463	3.15634	95.9579	116.776	UP	FALSE	FALSE	UP	PLATZ transcription factor family protein	-//-
	BnaC07g14700D	1.73096	1.63164	27.5595	46.0248	UP	FALSE	FALSE	UP	PLATZ transcription factor family protein	-//-
	BnaC07g34900D	6.6104	6.28368	38.0716	50.3868	UP	FALSE	FALSE	UP	PLATZ transcription factor family protein	sp|P0CB19|Y3081_ARATH Uncharacterized protein At3g50808 OS=Arabidopsis thaliana GN=At3g50808 PE=4 SV=1//2.21545e-06
	BnaC08g07590D	3.81486	3.76181	2.74991	4.84824	UP	FALSE	FALSE	FALSE	PLATZ transcription factor domain-containing protein	-//-
	BnaC08g11100D	4.54977	3.93076	25.2877	38.1377	UP	FALSE	FALSE	UP	PLATZ transcription factor family protein	-//-
	BnaC08g19610D	2.21735	2.77062	20.8672	20.3538	UP	FALSE	FALSE	UP	PLATZ transcription factor family protein	-//-
	BnaC09g19570D	0.272414	0.0503392	3.79903	4.49061	UP	FALSE	FALSE	UP	PLATZ transcription factor family protein	-//-
	BnaCnng65920D	3.97049	3.47068	9.90767	13.9678	UP	FALSE	FALSE	UP	PLATZ transcription factor family protein	-//-
Pseudo ARR-B(8)	BnaA04g26750D	0.204872	0.389922	3.48803	8.97365	UP	UP	FALSE	UP	PRR9; two-component response regulator-like APRR9; K12128 pseudo-response regulator 9	sp|Q8L500|APRR9_ARATH Two-component response regulator-like APRR9 OS=Arabidopsis thaliana GN=APRR9 PE=1 SV=2//0
	BnaA05g01090D	0.261618	0.294175	3.9791	7.70468	UP	UP	FALSE	UP	PRR9; two-component response regulator-like APRR9; K12128 pseudo-response regulator 9	sp|Q8L500|APRR9_ARATH Two-component response regulator-like APRR9 OS=Arabidopsis thaliana GN=APRR9 PE=1 SV=2//5.28783e-173
	BnaA06g26980D	4.56934	4.02879	10.9512	19.2916	UP	UP	FALSE	UP	PRR5; pseudo-response regulator 5; K12130 pseudo-response regulator 5	sp|Q6LA42|APRR5_ARATH Two-component response regulator-like APRR5 OS=Arabidopsis thaliana GN=APRR5 PE=1 SV=2//0
	BnaC02g03470D	1.02361	0.87656	0.092265	0.210679	DOWN	FALSE	FALSE	DOWN	PRR7; pseudo-response regulator 7; K12129 pseudo-response regulator 7	sp|Q93WK5|APRR7_ARATH Two-component response regulator-like APRR7 OS=Arabidopsis thaliana GN=APRR7 PE=1 SV=1//0
	BnaC04g00640D	0.205262	0.388402	21.0814	45.2469	UP	UP	FALSE	UP	PRR9; two-component response regulator-like APRR9; K12128 pseudo-response regulator 9	sp|Q8L500|APRR9_ARATH Two-component response regulator-like APRR9 OS=Arabidopsis thaliana GN=APRR9 PE=1 SV=2//0
	BnaC04g51630D	3.19516	4.11169	59.1977	50.3954	UP	FALSE	FALSE	UP	PRR9; two-component response regulator-like APRR9; K12128 pseudo-response regulator 9	sp|Q8L500|APRR9_ARATH Two-component response regulator-like APRR9 OS=Arabidopsis thaliana GN=APRR9 PE=1 SV=2//0
	BnaC07g29960D	8.60463	6.89716	19.1511	26.9066	UP	FALSE	FALSE	UP	PRR5; pseudo-response regulator 5; K12130 pseudo-response regulator 5	sp|Q6LA42|APRR5_ARATH Two-component response regulator-like APRR5 OS=Arabidopsis thaliana GN=APRR5 PE=1 SV=2//0
	BnaC09g04380D	1.93178	1.55638	0.0343879	0.102491	DOWN	FALSE	FALSE	DOWN	PRR5; pseudo-response regulator 5; K12130 pseudo-response regulator 5	sp|Q6LA42|APRR5_ARATH Two-component response regulator-like APRR5 OS=Arabidopsis thaliana GN=APRR5 PE=1 SV=2//0
RB(2)	BnaA01g30730D	1.67342	1.7976	4.77072	4.27679	UP	FALSE	FALSE	UP	RBR1; Retinoblastoma-related protein 1; K04681 retinoblastoma-like protein 1	sp|Q9LKZ3|RBR1_ARATH Retinoblastoma-related protein 1 OS=Arabidopsis thaliana GN=RBR1 PE=1 SV=1//0
	BnaCnng22930D	3.19929	3.49656	11.4455	8.27794	UP	DOWN	FALSE	UP	RBR1; Retinoblastoma-related protein 1; K04681 retinoblastoma-like protein 1	sp|Q9LKZ3|RBR1_ARATH Retinoblastoma-related protein 1 OS=Arabidopsis thaliana GN=RBR1 PE=1 SV=1//0
Rcd1-like(4)	BnaA01g36820D	2.40248	2.33262	0.165655	0.473252	DOWN	FALSE	FALSE	DOWN	cell differentiation, Rcd1-like protein; K12606 CCR4-NOT transcription complex subunit 9	sp|Q5PQL2|RCD1_RAT Cell differentiation protein RCD1 homolog OS=Rattus norvegicus GN=Rqcd1 PE=1 SV=1//2.49915e-131
	BnaA05g20110D	4.9935	5.35549	8.61301	8.97042	UP	FALSE	FALSE	UP	cell differentiation, Rcd1-like protein; K12606 CCR4-NOT transcription complex subunit 9	sp|Q5PQL2|RCD1_RAT Cell differentiation protein RCD1 homolog OS=Rattus norvegicus GN=Rqcd1 PE=1 SV=1//1.44479e-132
	BnaC05g31480D	4.33934	4.23273	7.279	8.46647	UP	FALSE	FALSE	UP	cell differentiation, Rcd1-like protein; K12606 CCR4-NOT transcription complex subunit 9	sp|Q5PQL2|RCD1_RAT Cell differentiation protein RCD1 homolog OS=Rattus norvegicus GN=Rqcd1 PE=1 SV=1//2.15622e-128
	BnaCnng35300D	1.03952	0.95319	0.130305	0.60139	FALSE	UP	FALSE	DOWN	PUB22; E3 ubiquitin-protein ligase PUB22	sp|Q9SVC6|PUB22_ARATH E3 ubiquitin-protein ligase PUB22 OS=Arabidopsis thaliana GN=PUB22 PE=1 SV=1//0
RWP-RK(15)	BnaA01g02150D	1.68549	3.77806	0.0261186	0.0406502	DOWN	FALSE	UP	DOWN	plant regulator RWP-RK family protein	sp|Q7X9B9|NLP2_ARATH Protein NLP2 OS=Arabidopsis thaliana GN=NLP2 PE=2 SV=3//0
	BnaA01g35090D	5.6277	5.52659	13.9974	12.9955	UP	FALSE	FALSE	UP	NLP7; NIN like protein 7	sp|Q84TH9|NLP7_ARATH Protein NLP7 OS=Arabidopsis thaliana GN=NLP7 PE=1 SV=2//0
	BnaA03g46410D	11.053	10.3825	29.8251	24.6639	UP	FALSE	FALSE	UP	NLP7; NIN like protein 7	sp|Q84TH9|NLP7_ARATH Protein NLP7 OS=Arabidopsis thaliana GN=NLP7 PE=1 SV=2//0
	BnaA05g03380D	0.506645	0.492407	11.2541	10.092	UP	FALSE	FALSE	UP	nodule inception protein-like protein 8	sp|O22864|NLP8_ARATH Protein NLP8 OS=Arabidopsis thaliana GN=NLP8 PE=2 SV=1//0
	BnaA06g25930D	4.1239	4.53447	10.2469	10.2125	UP	FALSE	FALSE	UP	plant regulator RWP-RK family protein	sp|Q8H111|NLP1_ARATH Protein NLP1 OS=Arabidopsis thaliana GN=NLP1 PE=2 SV=1//0
	BnaA07g18430D	2.58939	3.25634	0.435693	0.974404	DOWN	FALSE	FALSE	DOWN	nodule inception protein-like protein 9	sp|Q9M1B0|NLP9_ARATH Protein NLP9 OS=Arabidopsis thaliana GN=NLP9 PE=2 SV=1//0
	BnaA07g32630D	1.27512	1.5961	2.79428	3.43526	UP	FALSE	FALSE	UP	nodule inception protein-like protein 5	sp|Q9SFW8|NLP5_ARATH Protein NLP5 OS=Arabidopsis thaliana GN=NLP5 PE=2 SV=1//0
	BnaC01g03280D	2.49687	2.75701	0.0236247	0.0626608	DOWN	FALSE	FALSE	DOWN	plant regulator RWP-RK family protein	sp|Q7X9B9|NLP2_ARATH Protein NLP2 OS=Arabidopsis thaliana GN=NLP2 PE=2 SV=3//0
	BnaC01g15850D	4.27659	4.00369	8.94799	8.07599	UP	FALSE	FALSE	UP	NLP7; NIN like protein 7	sp|Q84TH9|NLP7_ARATH Protein NLP7 OS=Arabidopsis thaliana GN=NLP7 PE=1 SV=2//0
	BnaC03g24230D	2.7682	3.2972	9.054	9.05973	UP	FALSE	FALSE	UP	nodule inception protein-like protein 8	sp|O22864|NLP8_ARATH Protein NLP8 OS=Arabidopsis thaliana GN=NLP8 PE=2 SV=1//0
	BnaC03g47510D	3.65487	3.89584	18.3903	16.4599	UP	FALSE	FALSE	UP	plant regulator RWP-RK family protein	sp|Q8H111|NLP1_ARATH Protein NLP1 OS=Arabidopsis thaliana GN=NLP1 PE=2 SV=1//0
	BnaC04g02980D	2.31452	2.65271	15.7469	13.5305	UP	FALSE	FALSE	UP	nodule inception protein-like protein 8	sp|O22864|NLP8_ARATH Protein NLP8 OS=Arabidopsis thaliana GN=NLP8 PE=2 SV=1//0
	BnaC04g48980D	0.158494	0.236769	3.17725	6.48614	UP	FALSE	FALSE	UP	nodule inception protein-like protein 8	sp|O22864|NLP8_ARATH Protein NLP8 OS=Arabidopsis thaliana GN=NLP8 PE=2 SV=1//0
	BnaC06g37080D	2.24029	2.43519	7.46048	8.86733	UP	FALSE	FALSE	UP	nodule inception protein-like protein 5	sp|Q9SFW8|NLP5_ARATH Protein NLP5 OS=Arabidopsis thaliana GN=NLP5 PE=2 SV=1//0
	BnaC07g06170D	3.68694	4.39001	8.6141	6.07652	UP	DOWN	FALSE	UP	plant regulator RWP-RK family protein	sp|Q8H111|NLP1_ARATH Protein NLP1 OS=Arabidopsis thaliana GN=NLP1 PE=2 SV=1//0
S1Fa-like(2)	BnaA09g33670D	1.29652	0.794866	4.09739	4.90262	UP	FALSE	FALSE	UP	DNA-binding protein S1FA2	-//-
	BnaC04g27370D	5.09718	5.34353	7.8691	8.57082	UP	FALSE	FALSE	UP	concanavalin A-like lectin protein kinase family protein	sp|Q9LFH9|LRK81_ARATH L-type lectin-domain containing receptor kinase VIII.1 OS=Arabidopsis thaliana GN=LECRK81 PE=2 SV=1//0
SBP(7)	BnaA05g02680D	1.75067	1.29948	2.77002	3.44973	UP	FALSE	FALSE	UP	SPL9; squamosa promoter-binding-like protein 9	sp|Q700W2|SPL9_ARATH Squamosa promoter-binding-like protein 9 OS=Arabidopsis thaliana GN=SPL9 PE=2 SV=2//2.23378e-165
	BnaA06g14810D	5.85676	5.71174	11.951	7.37215	UP	DOWN	FALSE	UP	SPL14; squamosa promoter binding-like protein 14	sp|Q8RY95|SPL14_ARATH Squamosa promoter-binding-like protein 14 OS=Arabidopsis thaliana GN=SPL14 PE=2 SV=3//0
	BnaA07g27730D	0.792334	0.83172	1.28545	1.45886	UP	FALSE	FALSE	UP	squamosa promoter-binding-like protein 6	sp|Q94JW8|SPL6_ARATH Squamosa promoter-binding-like protein 6 OS=Arabidopsis thaliana GN=SPL6 PE=2 SV=2//1.87159e-92
	BnaC03g16490D	0.63374	1.47074	0.0163175	0.122008	DOWN	FALSE	FALSE	DOWN	squamosa promoter-binding-like protein 13	sp|P0DI11|SP13B_ARATH Squamosa promoter-binding-like protein 13B OS=Arabidopsis thaliana GN=SPL13B PE=3 SV=1//1.27914e-140
	BnaC05g21270D	1.85082	2.33523	0.097464	0.24014	DOWN	FALSE	FALSE	DOWN	SPL11; squamosa promoter-binding-like protein 11	sp|Q9FZK0|SPL11_ARATH Squamosa promoter-binding-like protein 11 OS=Arabidopsis thaliana GN=SPL11 PE=2 SV=2//1.37842e-157
	BnaC05g21280D	1.24355	1.44901	0.0969216	0.281043	DOWN	FALSE	FALSE	DOWN	SPL10; squamosa promoter-binding-like protein 10	sp|Q8S9L0|SPL10_ARATH Squamosa promoter-binding-like protein 10 OS=Arabidopsis thaliana GN=SPL10 PE=2 SV=2//4.06724e-149
	BnaC07g17030D	4.37685	4.26191	0.0118052	0.0493584	DOWN	FALSE	FALSE	DOWN	SPL2; squamosa promoter-binding-like protein 2	sp|Q9S840|SPL2_ARATH Squamosa promoter-binding-like protein 2 OS=Arabidopsis thaliana GN=SPL2 PE=2 SV=1//0
SET(11)	BnaA03g01550D	3.45574	7.16725	1.58262	3.48326	FALSE	UP	UP	FALSE	SUVH1; histone-lysine N-methyltransferase, H3 lysine-9 specific SUVH1; K11420 euchromatic histone-lysine N-methyltransferase [EC:2.1.1.43]	sp|Q9FF80|SUVH1_ARATH Histone-lysine N-methyltransferase, H3 lysine-9 specific SUVH1 OS=Arabidopsis thaliana GN=SUVH1 PE=2 SV=1//0
	BnaA03g04610D	9.82786	23.3811	0.520016	1.64126	DOWN	UP	UP	DOWN	SUVH4; histone-lysine N-methyltransferase, H3 lysine-9 specific SUVH4; K11420 euchromatic histone-lysine N-methyltransferase [EC:2.1.1.43]	sp|Q8GZB6|SUVH4_ARATH Histone-lysine N-methyltransferase, H3 lysine-9 specific SUVH4 OS=Arabidopsis thaliana GN=SUVH4 PE=1 SV=2//0
	BnaA07g33460D	4.68892	4.4284	8.47968	6.85181	UP	FALSE	FALSE	UP	EFS; histone-lysine N-methyltransferase ASHH2	sp|Q2LAE1|ASHH2_ARATH Histone-lysine N-methyltransferase ASHH2 OS=Arabidopsis thaliana GN=ASHH2 PE=1 SV=1//0
	BnaA09g00500D	10.1724	10.6579	25.2573	25.7005	UP	FALSE	FALSE	UP	SWN; histone-lysine N-methyltransferase EZA1; K11430 histone-lysine N-methyltransferase EZH2 [EC:2.1.1.43]	sp|Q9ZSM8|EZA1_ARATH Histone-lysine N-methyltransferase EZA1 OS=Arabidopsis thaliana GN=EZA1 PE=1 SV=1//0
	BnaA09g16090D	2.01582	2.06107	4.79668	3.32412	UP	DOWN	FALSE	UP	SDG25; histone methyltransferase SDG25	sp|F4K1J4|ATXR7_ARATH Histone-lysine N-methyltransferase ATXR7 OS=Arabidopsis thaliana GN=ATXR7 PE=2 SV=1//0
	BnaC02g30730D	1.84403	2.23081	0.236307	0.526131	DOWN	FALSE	FALSE	DOWN	SUVR2; histone-lysine N-methyltransferase SUVR2	sp|Q9FNC7|SUVR2_ARATH Histone-lysine N-methyltransferase SUVR2 OS=Arabidopsis thaliana GN=SUVR2 PE=2 SV=2//0
	BnaC06g43300D	4.16893	3.78712	5.92831	5.10741	UP	FALSE	FALSE	UP	SUVH3; histone-lysine N-methyltransferase, H3 lysine-9 specific SUVH3; K11420 euchromatic histone-lysine N-methyltransferase [EC:2.1.1.43]	sp|Q9C5P4|SUVH3_ARATH Histone-lysine N-methyltransferase, H3 lysine-9 specific SUVH3 OS=Arabidopsis thaliana GN=SUVH3 PE=2 SV=2//0
	BnaC06g43880D	1.39885	1.67204	4.64539	3.52976	UP	FALSE	FALSE	UP	SUVH3; histone-lysine N-methyltransferase, H3 lysine-9 specific SUVH3; K11420 euchromatic histone-lysine N-methyltransferase [EC:2.1.1.43]	sp|Q9C5P4|SUVH3_ARATH Histone-lysine N-methyltransferase, H3 lysine-9 specific SUVH3 OS=Arabidopsis thaliana GN=SUVH3 PE=2 SV=2//0
	BnaC08g24970D	6.1008	6.16079	10.2604	7.79594	UP	DOWN	FALSE	UP	SUVH9; putative histone-lysine N-methyltransferase, H3 lysine-9 specific SUVH9; K11420 euchromatic histone-lysine N-methyltransferase [EC:2.1.1.43]	sp|Q9T0G7|SUVH9_ARATH Histone-lysine N-methyltransferase family member SUVH9 OS=Arabidopsis thaliana GN=SUVH9 PE=1 SV=1//0
	BnaC09g50300D	6.9273	7.13356	0.137449	0.335619	DOWN	FALSE	FALSE	DOWN	SUVH1; histone-lysine N-methyltransferase, H3 lysine-9 specific SUVH1; K11420 euchromatic histone-lysine N-methyltransferase [EC:2.1.1.43]	sp|Q9FF80|SUVH1_ARATH Histone-lysine N-methyltransferase, H3 lysine-9 specific SUVH1 OS=Arabidopsis thaliana GN=SUVH1 PE=2 SV=1//0
	BnaCnng33180D	1.4398	1.63729	0.043114	0.119165	DOWN	FALSE	FALSE	DOWN	SDG35; SET domain protein 35	sp|Q9H7B4|SMYD3_HUMAN Histone-lysine N-methyltransferase SMYD3 OS=Homo sapiens GN=SMYD3 PE=1 SV=4//4.71901e-13
Sigma70-like(4)	BnaA06g26690D	1.4466	1.28872	5.60141	4.42624	UP	FALSE	FALSE	UP	SIGE; RNA polymerase sigma factor 5; K03093 RNA polymerase sigma factor	sp|Q9ZNX9|SIGE_ARATH RNA polymerase sigma factor sigE, chloroplastic/mitochondrial OS=Arabidopsis thaliana GN=SIGE PE=1 SV=1//0
	BnaA09g04990D	4.25073	5.2966	12.9596	11.7413	UP	FALSE	FALSE	UP	SIGE; RNA polymerase sigma factor 5; K03093 RNA polymerase sigma factor	sp|Q9ZNX9|SIGE_ARATH RNA polymerase sigma factor sigE, chloroplastic/mitochondrial OS=Arabidopsis thaliana GN=SIGE PE=1 SV=1//0
	BnaC07g30280D	0.782389	1.00218	2.19238	1.84338	UP	FALSE	FALSE	UP	SIGE; RNA polymerase sigma factor 5; K03093 RNA polymerase sigma factor	sp|Q9ZNX9|SIGE_ARATH RNA polymerase sigma factor sigE, chloroplastic/mitochondrial OS=Arabidopsis thaliana GN=SIGE PE=1 SV=1//0
	BnaC09g04550D	3.63169	4.20863	14.4165	12.7553	UP	FALSE	FALSE	UP	SIGE; RNA polymerase sigma factor 5; K03093 RNA polymerase sigma factor	sp|Q9ZNX9|SIGE_ARATH RNA polymerase sigma factor sigE, chloroplastic/mitochondrial OS=Arabidopsis thaliana GN=SIGE PE=1 SV=1//0
SNF2(15)	BnaA01g36010D	2.30178	2.77134	12.1716	10.1011	UP	FALSE	FALSE	UP	SNF2, helicase and zinc-finger domain-containing protein	sp|O60177|YG42_SCHPO Uncharacterized ATP-dependent helicase C23E6.02 OS=Schizosaccharomyces pombe (strain 972 / ATCC 24843) GN=SPBC23E6.02 PE=3 SV=1//7.01588e-99
	BnaA03g02230D	0.637231	0.822197	1.10577	1.31306	UP	FALSE	FALSE	UP	SNF2 and helicase domain-containing protein	sp|Q6NZP1|ZRAB3_MOUSE DNA annealing helicase and endonuclease ZRANB3 OS=Mus musculus GN=Zranb3 PE=1 SV=1//5.84066e-29
	BnaA03g21230D	3.95633	3.97651	8.10784	5.84347	UP	DOWN	FALSE	UP	BRM; ATP-dependent helicase BRAHMA; K11647 SWI/SNF-related matrix-associated actin-dependent regulator of chromatin subfamily A member 2/4 [EC:3.6.4.-]	sp|Q6EVK6|BRM_ARATH ATP-dependent helicase BRM OS=Arabidopsis thaliana GN=BRM PE=1 SV=1//0
	BnaA03g39050D	1.60745	1.55014	4.99968	3.62895	UP	FALSE	FALSE	UP	DRD1; putative chromatin remodeling protein; K10875 DNA repair and recombination protein RAD54 and RAD54-like protein [EC:3.6.4.-]	sp|Q9SIW3|SFH7_ARATH Phosphatidylinositol/phosphatidylcholine transfer protein SFH7 OS=Arabidopsis thaliana GN=SFH7 PE=2 SV=2//0
	BnaA03g58950D	2.76609	3.05378	10.5614	9.99881	UP	FALSE	FALSE	UP	CHR8; chromatin remodeling 8; K10841 DNA excision repair protein ERCC-6	sp|Q9ZV43|CHR8_ARATH Protein CHROMATIN REMODELING 8 OS=Arabidopsis thaliana GN=CHR8 PE=2 SV=1//0
	BnaA05g19140D	0.803534	1.06382	0.0236964	0.0511148	DOWN	FALSE	FALSE	DOWN	RING finger-related, SNF2 and helicase domain-containing protein	sp|Q9FNI6|SM3L2_ARATH Putative SWI/SNF-related matrix-associated actin-dependent regulator of chromatin subfamily A member 3-like 2 OS=Arabidopsis thaliana GN=At5g22750 PE=2 SV=1//1.84497e-103
	BnaA06g23080D	1.19598	1.36297	0.143846	0.359379	DOWN	FALSE	FALSE	DOWN	CHR24; protein chromatin remodeling 24	sp|Q8W103|CHR24_ARATH Protein CHROMATIN REMODELING 24 OS=Arabidopsis thaliana GN=CHR24 PE=2 SV=1//0
	BnaA09g18980D	1.04893	1.06971	3.13326	2.21874	UP	FALSE	FALSE	UP	ETL1; protein CHROMATIN REMODELING 19; K14439 SWI/SNF-related matrix-associated actin-dependent regulator of chromatin subfamily A containing DEAD/H box 1 [EC:3.6.4.12]	sp|Q9ZUL5|CHR19_ARATH Protein CHROMATIN REMODELING 19 OS=Arabidopsis thaliana GN=ETL1 PE=2 SV=1//2.32612e-18
	BnaA09g48020D	0.371179	1.2071	0.195079	0.300517	DOWN	FALSE	UP	FALSE	SNF2, helicase and zinc-finger domain-containing protein	sp|O60177|YG42_SCHPO Uncharacterized ATP-dependent helicase C23E6.02 OS=Schizosaccharomyces pombe (strain 972 / ATCC 24843) GN=SPBC23E6.02 PE=3 SV=1//6.01286e-48
	BnaA09g50860D	1.17863	1.42369	1.33272	1.78465	UP	FALSE	FALSE	UP	SWI2; protein CHROMATIN REMODELING 9	sp|F4I2H2|CHR9_ARATH Switch 2 OS=Arabidopsis thaliana GN=SWI2 PE=3 SV=1//0
	BnaC01g29070D	2.39359	2.44598	8.63511	6.9325	UP	FALSE	FALSE	UP	SNF2, helicase and zinc-finger domain-containing protein	sp|Q9FNI6|SM3L2_ARATH Putative SWI/SNF-related matrix-associated actin-dependent regulator of chromatin subfamily A member 3-like 2 OS=Arabidopsis thaliana GN=At5g22750 PE=2 SV=1//1.8638e-110
	BnaC05g45420D	2.14381	2.00962	3.55911	2.89726	UP	FALSE	FALSE	UP	CHR11; chromatin-remodeling protein 11; K11654 SWI/SNF-related matrix-associated actin-dependent regulator of chromatin subfamily A member 5 [EC:3.6.4.-]	sp|Q8RWY3|ISW2_ARATH Putative chromatin-remodeling complex ATPase chain OS=Arabidopsis thaliana GN=At3g06400 PE=2 SV=3//0
	BnaC07g15760D	0.0219505	0.0312702	2.20275	1.56547	UP	FALSE	FALSE	UP	SNF2 and helicase domain-containing protein	sp|Q5NC05|TTF2_MOUSE Transcription termination factor 2 OS=Mus musculus GN=Ttf2 PE=1 SV=2//4.75288e-78
	BnaC07g41400D	2.81273	3.10979	5.37182	5.40833	UP	FALSE	FALSE	UP	CHR8; chromatin remodeling 8; K10841 DNA excision repair protein ERCC-6	sp|Q9ZV43|CHR8_ARATH Protein CHROMATIN REMODELING 8 OS=Arabidopsis thaliana GN=CHR8 PE=2 SV=1//0
	BnaCnng50860D	0.42179	0.661288	2.92473	2.39568	UP	FALSE	FALSE	UP	chr40; chromatin remodeling 40; K10875 DNA repair and recombination protein RAD54 and RAD54-like protein [EC:3.6.4.-]	sp|Q9LK10|CLSY4_ARATH SNF2 domain-containing protein CLASSY 4 OS=Arabidopsis thaliana GN=CLSY4 PE=1 SV=1//2.20267e-17
SOH1(2)	BnaA10g15290D	3.17863	3.39523	6.4607	7.89794	UP	FALSE	FALSE	UP	MED31; mediator of RNA polymerase II transcription subunit 31; K15153 mediator of RNA polymerase II transcription subunit 31	sp|Q8VYB1|MED31_ARATH Mediator of RNA polymerase II transcription subunit 31 OS=Arabidopsis thaliana GN=MED31 PE=1 SV=1//9.84627e-99
	BnaC09g37710D	1.89223	2.14032	2.4951	2.76908	UP	FALSE	FALSE	UP	WD40 domain-containing protein	sp|Q8VYB1|MED31_ARATH Mediator of RNA polymerase II transcription subunit 31 OS=Arabidopsis thaliana GN=MED31 PE=1 SV=1//1.45539e-85
SRS(2)	BnaA04g04120D	4.33559	3.5215	0.0302143	0.175795	DOWN	FALSE	FALSE	DOWN	SRS6; SHI-related sequence 6	sp|Q9M2U4|SRS6_ARATH Protein SHI RELATED SEQUENCE 6 OS=Arabidopsis thaliana GN=SRS6 PE=2 SV=1//1.73556e-66
	BnaA10g20370D	2.40795	2.72238	0.0785656	0.305471	DOWN	FALSE	FALSE	DOWN	LRP1; protein LATERAL ROOT PRIMORDIUM 1	sp|Q94CK9|LRP1_ARATH Protein LATERAL ROOT PRIMORDIUM 1 OS=Arabidopsis thaliana GN=LRP1 PE=1 SV=1//6.47551e-138
SWI/SNF-BAF60b(11)	BnaA01g02810D	30.3237	37.3231	2.41378	11.2152	DOWN	UP	FALSE	DOWN	SWIB/MDM2 domain-containing protein	sp|Q05024|TRI1_YEAST Protein TRI1 OS=Saccharomyces cerevisiae (strain ATCC 204508 / S288c) GN=TRI1 PE=1 SV=1//7.76152e-14
	BnaA01g15930D	2.15497	2.64499	0.113436	0.978309	FALSE	FALSE	FALSE	DOWN	SWIB/MDM2 domain-containing protein	sp|Q08747|UAF30_YEAST Upstream activation factor subunit UAF30 OS=Saccharomyces cerevisiae (strain ATCC 204508 / S288c) GN=UAF30 PE=1 SV=1//2.84782e-10
	BnaA03g04760D	3.39739	5.88259	2.07926	4.76472	FALSE	UP	UP	FALSE	CHC1; chromodomain remodeling complex protein CHC1; K11650 SWI/SNF-related matrix-associated actin-dependent regulator of chromatin subfamily D	sp|Q9FMT4|SNF12_ARATH SWI/SNF complex component SNF12 homolog OS=Arabidopsis thaliana GN=At5g14170 PE=1 SV=1//6.61391e-06
	BnaA05g32850D	2.30037	2.97692	2.45171	4.1197	UP	FALSE	FALSE	FALSE	SWIB/MDM2 domain-containing protein	sp|Q05024|TRI1_YEAST Protein TRI1 OS=Saccharomyces cerevisiae (strain ATCC 204508 / S288c) GN=TRI1 PE=1 SV=1//2.54946e-16
	BnaA09g09480D	2.65273	3.29281	15.9961	12.2413	UP	DOWN	FALSE	UP	PHD finger, SWIB/MDM2 and GYF domain-containing protein	sp|Q9SD34|C3H44_ARATH Zinc finger CCCH domain-containing protein 44 OS=Arabidopsis thaliana GN=At3g51120 PE=2 SV=3//6.7679e-06
	BnaC08g48800D	2.80563	2.98134	6.08144	4.60821	UP	DOWN	FALSE	UP	zinc finger CCCH domain-containing protein 44	sp|Q9SD34|C3H44_ARATH Zinc finger CCCH domain-containing protein 44 OS=Arabidopsis thaliana GN=At3g51120 PE=2 SV=3//0
	BnaC09g09630D	5.74576	7.30989	44.5125	35.1825	UP	DOWN	FALSE	UP	PHD finger, SWIB/MDM2 and GYF domain-containing protein	sp|Q9SD34|C3H44_ARATH Zinc finger CCCH domain-containing protein 44 OS=Arabidopsis thaliana GN=At3g51120 PE=2 SV=3//3.52042e-06
	BnaCnng15310D	9.22946	12.7564	3.65477	8.5369	FALSE	UP	FALSE	FALSE	SWIB/MDM2 domain-containing protein	sp|Q08747|UAF30_YEAST Upstream activation factor subunit UAF30 OS=Saccharomyces cerevisiae (strain ATCC 204508 / S288c) GN=UAF30 PE=1 SV=1//1.83072e-15
	BnaCnng65730D	77.3403	96.4263	6.61417	20.9087	DOWN	UP	FALSE	DOWN	SWIB/MDM2 domain-containing protein	sp|Q05024|TRI1_YEAST Protein TRI1 OS=Saccharomyces cerevisiae (strain ATCC 204508 / S288c) GN=TRI1 PE=1 SV=1//7.72979e-14
	BnaA01g37140D	1.16034	1.06929	2.35807	1.73189	UP	FALSE	FALSE	UP	LDL2; lysine-specific histone demethylase 1-like 2; K11450 lysine-specific histone demethylase 1 [EC:1.-.-.-]	sp|Q9LID0|LDL2_ARATH Lysine-specific histone demethylase 1 homolog 2 OS=Arabidopsis thaliana GN=LDL2 PE=2 SV=1//0
	BnaC01g44770D	1.95867	2.16827	9.10249	6.88184	UP	DOWN	FALSE	UP	LDL2; lysine-specific histone demethylase 1-like 2; K11450 lysine-specific histone demethylase 1 [EC:1.-.-.-]	sp|Q9LID0|LDL2_ARATH Lysine-specific histone demethylase 1 homolog 2 OS=Arabidopsis thaliana GN=LDL2 PE=2 SV=1//0
TAZ(11)	BnaA01g30150D	3.19656	3.03507	4.58557	4.04048	UP	FALSE	FALSE	UP	HAC5; histone acetyltransferase HAC5; K04498 E1A/CREB-binding protein [EC:2.3.1.48]	sp|Q9LE42|HAC5_ARATH Histone acetyltransferase HAC5 OS=Arabidopsis thaliana GN=HAC5 PE=2 SV=1//8.87995e-142
	BnaA02g33650D	0.944424	0.614695	1.18996	1.16486	UP	FALSE	FALSE	FALSE	BT1; BTB and TAZ domain protein 1	sp|Q9FMK7|BT1_ARATH BTB/POZ and TAZ domain-containing protein 1 OS=Arabidopsis thaliana GN=BT1 PE=1 SV=1//0
	BnaA03g54130D	1.8773	0.576358	2.31586	1.4695	UP	FALSE	DOWN	UP	BT5; BTB and TAZ domain protein 5	sp|Q6EJ98|BT5_ARATH BTB/POZ and TAZ domain-containing protein 5 OS=Arabidopsis thaliana GN=BT5 PE=1 SV=1//0
	BnaA06g22570D	1.11461	0.280201	2.94323	2.74251	UP	FALSE	DOWN	UP	BT1; BTB and TAZ domain protein 1	sp|Q9FMK7|BT1_ARATH BTB/POZ and TAZ domain-containing protein 1 OS=Arabidopsis thaliana GN=BT1 PE=1 SV=1//0
	BnaA06g25030D	6.01473	7.23451	43.3419	41.6938	UP	FALSE	FALSE	UP	BT4; BTB and TAZ domain protein 4	sp|Q9FJX5|BT4_ARATH BTB/POZ and TAZ domain-containing protein 4 OS=Arabidopsis thaliana GN=BT4 PE=1 SV=1//0
	BnaA06g39180D	5.61274	2.88106	16.1571	18.0082	UP	FALSE	DOWN	UP	BT1; BTB and TAZ domain protein 1	sp|Q9FMK7|BT1_ARATH BTB/POZ and TAZ domain-containing protein 1 OS=Arabidopsis thaliana GN=BT1 PE=1 SV=1//6.18668e-72
	BnaA08g28380D	0.326274	0.182291	49.1365	40.7366	UP	FALSE	FALSE	UP	BT3; BTB and TAZ domain protein 3	sp|Q9SYL0|BT3_ARATH BTB/POZ and TAZ domain-containing protein 3 OS=Arabidopsis thaliana GN=BT3 PE=1 SV=2//1.77818e-164
	BnaC03g48540D	18.1931	17.8827	66.5965	75.0597	UP	FALSE	FALSE	UP	BT4; BTB and TAZ domain protein 4	sp|Q9FJX5|BT4_ARATH BTB/POZ and TAZ domain-containing protein 4 OS=Arabidopsis thaliana GN=BT4 PE=1 SV=1//0
	BnaC03g51080D	4.62852	3.27925	25.3525	26.3395	UP	FALSE	FALSE	UP	BT1; BTB and TAZ domain protein 1	sp|Q9FMK7|BT1_ARATH BTB/POZ and TAZ domain-containing protein 1 OS=Arabidopsis thaliana GN=BT1 PE=1 SV=1//0
	BnaC07g46630D	1.14316	0.533288	2.27866	1.89777	UP	FALSE	FALSE	UP	BT5; BTB and TAZ domain protein 5	sp|Q6EJ98|BT5_ARATH BTB/POZ and TAZ domain-containing protein 5 OS=Arabidopsis thaliana GN=BT5 PE=1 SV=1//0
	BnaC08g01420D	0.279433	0.328756	3.95787	3.59045	UP	FALSE	FALSE	UP	BT3; BTB and TAZ domain protein 3	sp|Q9SYL0|BT3_ARATH BTB/POZ and TAZ domain-containing protein 3 OS=Arabidopsis thaliana GN=BT3 PE=1 SV=2//1.89772e-169
TCP(11)	BnaA03g02330D	0.649829	1.61727	0.0711426	0.022462	DOWN	FALSE	FALSE	FALSE	TCP17; transcription factor TCP17	sp|Q9LEZ9|TCP17_ARATH Transcription factor TCP17 OS=Arabidopsis thaliana GN=TCP17 PE=2 SV=1//1.11284e-77
	BnaA03g02470D	22.9642	37.8753	2.07034	9.65562	DOWN	UP	UP	DOWN	transcription factor TCP21; K16221 transcription factor TCP21 (protein CCA1 HIKING EXPEDITION)	sp|Q9FTA2|TCP21_ARATH Transcription factor TCP21 OS=Arabidopsis thaliana GN=TCP21 PE=1 SV=1//5.32088e-10
	BnaA03g27750D	0.722398	0.690435	1.61846	2.08043	UP	FALSE	FALSE	UP	PTF1; transcription factor TCP13	sp|Q9S7W5|TCP13_ARATH Transcription factor TCP13 OS=Arabidopsis thaliana GN=TCP13 PE=1 SV=1//1.17505e-134
	BnaA03g56900D	0.165373	0.379402	2.91934	2.29126	UP	FALSE	FALSE	UP	transcription factor TCP9	sp|O64647|TCP9_ARATH Transcription factor TCP9 OS=Arabidopsis thaliana GN=TCP9 PE=2 SV=1//5.28508e-120
	BnaA05g05020D	9.35584	8.27444	24.4273	19.3309	UP	FALSE	FALSE	UP	transcription factor TCP9	sp|O64647|TCP9_ARATH Transcription factor TCP9 OS=Arabidopsis thaliana GN=TCP9 PE=2 SV=1//6.71503e-134
	BnaA09g14960D	3.71621	3.56488	14.9354	13.7032	UP	FALSE	FALSE	UP	transcription factor TCP8	sp|Q9C518|TCP8_ARATH Transcription factor TCP8 OS=Arabidopsis thaliana GN=TCP8 PE=1 SV=1//7.20847e-143
	BnaC02g41680D	0.936778	1.46173	0.0241584	0.0797239	DOWN	FALSE	FALSE	DOWN	transcription factor TCP7	sp|Q9FMX2|TCP7_ARATH Transcription factor TCP7 OS=Arabidopsis thaliana GN=TCP7 PE=2 SV=1//6.9597e-69
	BnaC03g25370D	1.36518	1.19558	4.65001	4.53532	UP	FALSE	FALSE	UP	transcription factor TCP9	sp|O64647|TCP9_ARATH Transcription factor TCP9 OS=Arabidopsis thaliana GN=TCP9 PE=2 SV=1//2.74634e-114
	BnaC03g32790D	0.717667	0.698017	1.69024	1.8447	UP	FALSE	FALSE	UP	PTF1; transcription factor TCP13	sp|Q9S7W5|TCP13_ARATH Transcription factor TCP13 OS=Arabidopsis thaliana GN=TCP13 PE=1 SV=1//1.55928e-134
	BnaC04g04400D	4.89721	5.26892	11.5702	8.7786	UP	FALSE	FALSE	UP	transcription factor TCP9	sp|O64647|TCP9_ARATH Transcription factor TCP9 OS=Arabidopsis thaliana GN=TCP9 PE=2 SV=1//1.81809e-139
	BnaC06g33040D	16.7185	16.0123	62.5365	67.7497	UP	FALSE	FALSE	UP	transcription factor TCP22	sp|Q9C7G4|TCP22_ARATH Transcription factor TCP22 OS=Arabidopsis thaliana GN=TCP22 PE=2 SV=1//1.68361e-72
Tify(30)	BnaA01g27170D	0.90977	0.867996	2.93723	6.23681	UP	UP	FALSE	UP	JAZ3; jasmonate-zim-domain protein 3; K13464 jasmonate ZIM domain-containing protein	sp|Q9LVI4|TIF6B_ARATH Protein TIFY 6B OS=Arabidopsis thaliana GN=TIFY6B PE=1 SV=1//0
	BnaA02g01520D	0.527012	0.585478	1.03832	2.62143	UP	FALSE	FALSE	UP	JAZ10; protein TIFY 9; K13464 jasmonate ZIM domain-containing protein	sp|Q93ZM9|TIF9_ARATH Protein TIFY 9 OS=Arabidopsis thaliana GN=TIFY9 PE=1 SV=1//6.41239e-103
	BnaA02g15990D	7.45578	6.57274	25.8575	47.4303	UP	UP	FALSE	UP	JAZ6; jasmonate-zim-domain protein 6; K13464 jasmonate ZIM domain-containing protein	sp|Q9C9E3|TI11B_ARATH Protein TIFY 11B OS=Arabidopsis thaliana GN=TIFY11B PE=1 SV=1//7.8373e-113
	BnaA05g22360D	4.96273	4.69024	21.22	30.1374	UP	FALSE	FALSE	UP	JAZ3; jasmonate-zim-domain protein 3; K13464 jasmonate ZIM domain-containing protein	sp|Q9LVI4|TIF6B_ARATH Protein TIFY 6B OS=Arabidopsis thaliana GN=TIFY6B PE=1 SV=1//0
	BnaA06g13250D	0.449266	0.196764	28.088	41.1711	UP	FALSE	FALSE	UP	JAZ1; jasmonate-zim-domain protein 1; K13464 jasmonate ZIM domain-containing protein	sp|Q9LMA8|TI10A_ARATH Protein TIFY 10A OS=Arabidopsis thaliana GN=TIFY10A PE=1 SV=1//1.81709e-114
	BnaA07g23750D	5.10464	3.74516	27.2058	33.2124	UP	FALSE	FALSE	UP	TIFY7; putative jasmonate signaling protein JAZ9; K13464 jasmonate ZIM domain-containing protein	sp|Q8W4J8|TIF7_ARATH Protein TIFY 7 OS=Arabidopsis thaliana GN=TIFY7 PE=1 SV=2//5.38587e-90
	BnaA07g28810D	10.6199	9.73026	1.74883	4.78719	FALSE	UP	FALSE	DOWN	TIFY7; putative jasmonate signaling protein JAZ9; K13464 jasmonate ZIM domain-containing protein	sp|Q8W4J8|TIF7_ARATH Protein TIFY 7 OS=Arabidopsis thaliana GN=TIFY7 PE=1 SV=2//8.70527e-109
	BnaA07g30200D	1.09564	0.612133	0.467586	1.76086	UP	UP	FALSE	FALSE	JAZ6; jasmonate-zim-domain protein 6; K13464 jasmonate ZIM domain-containing protein	sp|Q9C9E3|TI11B_ARATH Protein TIFY 11B OS=Arabidopsis thaliana GN=TIFY11B PE=1 SV=1//4.45204e-128
	BnaA07g31880D	8.6354	7.59699	42.3455	41.2252	UP	FALSE	FALSE	UP	TIFY10B; protein TIFY 10B; K13464 jasmonate ZIM domain-containing protein	sp|Q9S7M2|TI10B_ARATH Protein TIFY 10B OS=Arabidopsis thaliana GN=TIFY10B PE=1 SV=1//6.85093e-95
	BnaA08g17540D	0.173524	0.0439955	0.363807	2.45496	UP	FALSE	FALSE	FALSE	JAZ8; protein TIFY 5A	sp|Q8LBM2|TIF5A_ARATH Protein TIFY 5A OS=Arabidopsis thaliana GN=TIFY5A PE=1 SV=1//1.66491e-62
	BnaA08g23150D	0.648229	0.376111	7.72298	9.27397	UP	FALSE	FALSE	UP	JAZ5; protein TIFY 11A; K13464 jasmonate ZIM domain-containing protein	sp|Q9LDU5|TI11A_ARATH Protein TIFY 11A OS=Arabidopsis thaliana GN=TIFY11A PE=1 SV=1//3.66365e-101
	BnaA09g44300D	1.02301	0.722332	16.8911	28.627	UP	FALSE	FALSE	UP	probable carboxylesterase 1	sp|Q9LMA7|CXE1_ARATH Probable carboxylesterase 1 OS=Arabidopsis thaliana GN=CXE1 PE=2 SV=1//8.78562e-127
	BnaA10g14660D	84.97	20.2418	286.88	86.2199	UP	DOWN	DOWN	UP	JAZ12; protein TIFY 3B; K13464 jasmonate ZIM domain-containing protein	sp|Q9C5K8|TIF3B_ARATH Protein TIFY 3B OS=Arabidopsis thaliana GN=TIFY3B PE=1 SV=1//1.52639e-47
	BnaA10g20060D	1.21683	1.16747	21.8941	43.0472	UP	UP	FALSE	UP	JAZ10; protein TIFY 9; K13464 jasmonate ZIM domain-containing protein	sp|Q93ZM9|TIF9_ARATH Protein TIFY 9 OS=Arabidopsis thaliana GN=TIFY9 PE=1 SV=1//4.73045e-104
	BnaC01g22850D	6.37085	5.5143	13.0842	9.93003	UP	FALSE	FALSE	UP	PPD2; protein PEAPOD2	sp|Q8GY55|TIF4B_ARATH Protein TIFY 4B OS=Arabidopsis thaliana GN=TIFY4B PE=1 SV=1//3.8496e-174
	BnaC02g20120D	15.0269	11.8745	10.2294	15.9307	UP	FALSE	FALSE	FALSE	TIFY7; putative jasmonate signaling protein JAZ9; K13464 jasmonate ZIM domain-containing protein	sp|Q8W4J8|TIF7_ARATH Protein TIFY 7 OS=Arabidopsis thaliana GN=TIFY7 PE=1 SV=2//7.51098e-125
	BnaC02g45660D	9.00271	5.95413	8.30963	12.5279	UP	FALSE	FALSE	FALSE	JAZ6; jasmonate-zim-domain protein 6; K13464 jasmonate ZIM domain-containing protein	sp|Q9C9E3|TI11B_ARATH Protein TIFY 11B OS=Arabidopsis thaliana GN=TIFY11B PE=1 SV=1//3.17484e-118
	BnaC05g14810D	0.903069	0.677032	36.7611	63.1529	UP	UP	FALSE	UP	JAZ1; jasmonate-zim-domain protein 1; K13464 jasmonate ZIM domain-containing protein	sp|Q9LMA8|TI10A_ARATH Protein TIFY 10A OS=Arabidopsis thaliana GN=TIFY10A PE=1 SV=1//1.05521e-113
	BnaC05g23060D	0.0889574	0.123451	0.0885464	1.87913	UP	UP	FALSE	FALSE	JAZ8; protein TIFY 5A	sp|Q8LBM2|TIF5A_ARATH Protein TIFY 5A OS=Arabidopsis thaliana GN=TIFY5A PE=1 SV=1//2.10016e-55
	BnaC05g35610D	4.23874	4.07781	30.1667	41.9508	UP	FALSE	FALSE	UP	JAZ3; jasmonate-zim-domain protein 3; K13464 jasmonate ZIM domain-containing protein	sp|Q9LVI4|TIF6B_ARATH Protein TIFY 6B OS=Arabidopsis thaliana GN=TIFY6B PE=1 SV=1//0
	BnaC06g24560D	1.50916	1.44195	3.42163	5.8213	UP	FALSE	FALSE	UP	TIFY7; putative jasmonate signaling protein JAZ9; K13464 jasmonate ZIM domain-containing protein	sp|Q8W4J8|TIF7_ARATH Protein TIFY 7 OS=Arabidopsis thaliana GN=TIFY7 PE=1 SV=2//2.18639e-89
	BnaC06g33640D	5.67117	5.98204	1.37799	3.82189	FALSE	UP	FALSE	DOWN	JAZ6; jasmonate-zim-domain protein 6; K13464 jasmonate ZIM domain-containing protein	sp|Q9C9E3|TI11B_ARATH Protein TIFY 11B OS=Arabidopsis thaliana GN=TIFY11B PE=1 SV=1//2.74682e-114
	BnaC06g35750D	12.6522	11.8085	66.4422	57.9413	UP	FALSE	FALSE	UP	TIFY10B; protein TIFY 10B; K13464 jasmonate ZIM domain-containing protein	sp|Q9S7M2|TI10B_ARATH Protein TIFY 10B OS=Arabidopsis thaliana GN=TIFY10B PE=1 SV=1//5.63368e-95
	BnaC08g18640D	0.457928	0.380992	1.06399	2.54352	UP	UP	FALSE	UP	JAZ1; jasmonate-zim-domain protein 1; K13464 jasmonate ZIM domain-containing protein	sp|Q9LMA8|TI10A_ARATH Protein TIFY 10A OS=Arabidopsis thaliana GN=TIFY10A PE=1 SV=1//1.25814e-112
	BnaC08g36840D	1.5558	0.66937	44.4083	60.2272	UP	FALSE	FALSE	UP	JAZ1; jasmonate-zim-domain protein 1; K13464 jasmonate ZIM domain-containing protein	sp|Q9LMA8|TI10A_ARATH Protein TIFY 10A OS=Arabidopsis thaliana GN=TIFY10A PE=1 SV=1//1.57664e-122
	BnaC08g37780D	9.47803	8.53556	21.8405	39.7747	UP	UP	FALSE	UP	JAZ5; protein TIFY 11A; K13464 jasmonate ZIM domain-containing protein	sp|Q9LDU5|TI11A_ARATH Protein TIFY 11A OS=Arabidopsis thaliana GN=TIFY11A PE=1 SV=1//1.54319e-110
	BnaC08g48340D	0.0964628	0.12618	7.38704	10.9366	UP	FALSE	FALSE	UP	JAZ5; protein TIFY 11A; K13464 jasmonate ZIM domain-containing protein	sp|Q9LDU5|TI11A_ARATH Protein TIFY 11A OS=Arabidopsis thaliana GN=TIFY11A PE=1 SV=1//2.15441e-81
	BnaC09g36990D	29.5363	30.5946	38.1348	41.9733	UP	FALSE	FALSE	UP	JAZ12; protein TIFY 3B; K13464 jasmonate ZIM domain-containing protein	sp|Q9C5K8|TIF3B_ARATH Protein TIFY 3B OS=Arabidopsis thaliana GN=TIFY3B PE=1 SV=1//2.34874e-66
	BnaC09g43860D	3.67799	3.3469	69.3328	114.108	UP	FALSE	FALSE	UP	JAZ10; protein TIFY 9; K13464 jasmonate ZIM domain-containing protein	sp|Q93ZM9|TIF9_ARATH Protein TIFY 9 OS=Arabidopsis thaliana GN=TIFY9 PE=1 SV=1//1.05046e-100
	BnaCnng65670D	4.67889	3.08634	6.2984	11.41	UP	UP	FALSE	UP	TIFY7; putative jasmonate signaling protein JAZ9; K13464 jasmonate ZIM domain-containing protein	sp|Q8W4J8|TIF7_ARATH Protein TIFY 7 OS=Arabidopsis thaliana GN=TIFY7 PE=1 SV=2//2.43563e-128
TRAF(10)	BnaA01g10220D(10)	10.9987	9.13773	36.5276	33.3251	UP	FALSE	FALSE	UP	NPR4; NPR1-like protein 4; K14508 regulatory protein NPR1	sp|Q5ICL9|NPR4_ARATH Regulatory protein NPR4 OS=Arabidopsis thaliana GN=NPR4 PE=1 SV=1//0
	BnaA02g23720D	0.347492	0.336079	5.06452	3.7129	UP	FALSE	FALSE	UP	NPR3; NPR1-like protein 3; K14508 regulatory protein NPR1	sp|Q8L746|NPR3_ARATH Regulatory protein NPR3 OS=Arabidopsis thaliana GN=NPR3 PE=1 SV=1//0
	BnaA06g15530D	10.496	9.70882	36.0721	26.1278	UP	DOWN	FALSE	UP	BTB/POZ domain-containing protein; K10523 speckle-type POZ protein	sp|Q9XHZ8|Y1178_ARATH BTB/POZ domain-containing protein At1g21780 OS=Arabidopsis thaliana GN=At1g21780 PE=1 SV=1//0
	BnaAnng05410D	4.3469	3.61846	86.6096	84.2456	UP	FALSE	FALSE	UP	NPR3; NPR1-like protein 3; K14508 regulatory protein NPR1	sp|Q8L746|NPR3_ARATH Regulatory protein NPR3 OS=Arabidopsis thaliana GN=NPR3 PE=1 SV=1//0
	BnaAnng23640D	12.9699	10.7864	16.2914	16.2942	UP	FALSE	FALSE	UP	BPM4; BTB/POZ and M4 domain-containing protein; K10523 speckle-type POZ protein	sp|Q9SRV1|BPM4_ARATH BTB/POZ and MATH domain-containing protein 4 OS=Arabidopsis thaliana GN=BPM4 PE=1 SV=1//3.55355e-169
	BnaC01g12020D	3.74747	3.54795	20.9307	20.1221	UP	FALSE	FALSE	UP	NPR4; NPR1-like protein 4; K14508 regulatory protein NPR1	sp|Q5ICL9|NPR4_ARATH Regulatory protein NPR4 OS=Arabidopsis thaliana GN=NPR4 PE=1 SV=1//0
	BnaC03g09550D	0.775839	0.707586	1.62399	1.1237	UP	FALSE	FALSE	UP	ABAP1; ARMADILLO BTB protein 1	sp|B9DHT4|ARIA_ARATH ARM REPEAT PROTEIN INTERACTING WITH ABF2 OS=Arabidopsis thaliana GN=ARIA PE=1 SV=2//1.18047e-144
	BnaC03g28120D	2.55792	2.04245	4.12706	4.67457	UP	FALSE	FALSE	UP	BTB/POZ domain-containing protein; K10523 speckle-type POZ protein	sp|Q6DBN1|Y4845_ARATH BTB/POZ domain-containing protein At4g08455 OS=Arabidopsis thaliana GN=At4g08455 PE=1 SV=1//2.0759e-82
	BnaC05g17140D	6.94142	7.48286	31.3889	20.3853	UP	DOWN	FALSE	UP	BTB/POZ domain-containing protein; K10523 speckle-type POZ protein	sp|Q9XHZ8|Y1178_ARATH BTB/POZ domain-containing protein At1g21780 OS=Arabidopsis thaliana GN=At1g21780 PE=1 SV=1//0
	BnaC07g02890D	3.18353	2.28276	56.0413	47.8432	UP	FALSE	FALSE	UP	NPR3; NPR1-like protein 3; K14508 regulatory protein NPR1	sp|Q8L746|NPR3_ARATH Regulatory protein NPR3 OS=Arabidopsis thaliana GN=NPR3 PE=1 SV=1//0
Trihelix(31)	BnaA01g17960D	6.09149	6.88641	13.3337	14.3044	UP	FALSE	FALSE	UP	FIP2; FRIGIDA interacting protein 2	sp|Q9LJG8|ASIL2_ARATH Trihelix transcription factor ASIL2 OS=Arabidopsis thaliana GN=ASIL2 PE=2 SV=1//7.88728e-10
	BnaA01g29570D	3.97328	4.29769	14.7384	12.6368	UP	FALSE	FALSE	UP	sequence-specific DNA binding transcription factor	sp|Q9LJG8|ASIL2_ARATH Trihelix transcription factor ASIL2 OS=Arabidopsis thaliana GN=ASIL2 PE=2 SV=1//1.31947e-20
	BnaA01g31180D	15.7644	16.6662	63.6485	58.6594	UP	FALSE	FALSE	UP	sequence-specific DNA binding transcription factor	sp|Q9LJG8|ASIL2_ARATH Trihelix transcription factor ASIL2 OS=Arabidopsis thaliana GN=ASIL2 PE=2 SV=1//1.94274e-15
	BnaA02g25620D	4.22976	4.84981	18.2583	16.9928	UP	FALSE	FALSE	UP	DNA-binding protein-like protein	sp|Q39117|TGT2_ARATH Trihelix transcription factor GT-2 OS=Arabidopsis thaliana GN=GT-2 PE=2 SV=1//1.25241e-13
	BnaA02g27740D	1.71066	1.91861	1.89054	2.40052	UP	FALSE	FALSE	FALSE	trihelix transcription factor GT-4	sp|Q9LU92|TGT4_ARATH Trihelix transcription factor GT-4 OS=Arabidopsis thaliana GN=GT-4 PE=2 SV=1//0
	BnaA03g20860D	14.473	14.2212	28.8937	27.6609	UP	FALSE	FALSE	UP	Alcohol dehydrogenase transcription factor myb/SANT-like protein	sp|Q9LJG8|ASIL2_ARATH Trihelix transcription factor ASIL2 OS=Arabidopsis thaliana GN=ASIL2 PE=2 SV=1//1.69227e-10
	BnaA05g04250D	10.1344	9.98484	9.85604	12.7314	UP	FALSE	FALSE	UP	Alcohol dehydrogenase transcription factor myb/SANT-like protein	sp|Q9LJG8|ASIL2_ARATH Trihelix transcription factor ASIL2 OS=Arabidopsis thaliana GN=ASIL2 PE=2 SV=1//1.02505e-07
	BnaA05g06470D	0.748331	0.688814	30.5368	27.1308	UP	FALSE	FALSE	UP	trihelix transcription factor GT-3b	sp|O80450|TGT3B_ARATH Trihelix transcription factor GT-3b OS=Arabidopsis thaliana GN=GT-3B PE=1 SV=1//4.71399e-92
	BnaA06g08520D	4.06467	3.98093	8.16558	7.77094	UP	FALSE	FALSE	UP	trihelix transcription factor GT-1	sp|Q9FX53|TGT1_ARATH Trihelix transcription factor GT-1 OS=Arabidopsis thaliana GN=GT-1 PE=1 SV=1//0
	BnaA06g29110D	10.1779	10.7662	0.133962	0.436973	DOWN	FALSE	FALSE	DOWN	trihelix transcription factor GTL2	sp|Q8H181|GTL2_ARATH Trihelix transcription factor GTL2 OS=Arabidopsis thaliana GN=At5g28300 PE=2 SV=1//0
	BnaA07g05190D	1.15178	1.02239	4.13715	3.32526	UP	FALSE	FALSE	UP	homeodomain-like superfamily protein	sp|Q9LJG8|ASIL2_ARATH Trihelix transcription factor ASIL2 OS=Arabidopsis thaliana GN=ASIL2 PE=2 SV=1//7.52896e-08
	BnaA07g17950D	3.49046	3.02652	7.51756	7.04715	UP	FALSE	FALSE	UP	sequence-specific DNA binding transcription factor	sp|Q9LJG8|ASIL2_ARATH Trihelix transcription factor ASIL2 OS=Arabidopsis thaliana GN=ASIL2 PE=2 SV=1//3.06104e-26
	BnaA07g21220D	0.557158	1.36957	0.0533773	0.248104	DOWN	FALSE	FALSE	DOWN	hypothetical protein	-//-
	BnaA08g08190D	0.631615	0.518294	2.1878	2.71943	UP	FALSE	FALSE	UP	Alcohol dehydrogenase transcription factor myb/SANT-like protein	sp|Q9LJG8|ASIL2_ARATH Trihelix transcription factor ASIL2 OS=Arabidopsis thaliana GN=ASIL2 PE=2 SV=1//3.01632e-06
	BnaA09g46250D	5.37369	5.47132	10.7314	11.2019	UP	FALSE	FALSE	UP	trihelix transcription factor GT-1	sp|Q9FX53|TGT1_ARATH Trihelix transcription factor GT-1 OS=Arabidopsis thaliana GN=GT-1 PE=1 SV=1//0
	BnaAnng16540D	3.75974	4.54564	11.1559	9.24742	UP	FALSE	FALSE	UP	aspartate/glutamate/uridylate kinase family protein	sp|Q7VD61|PYRH_PROMA Uridylate kinase OS=Prochlorococcus marinus (strain SARG / CCMP1375 / SS120) GN=pyrH PE=3 SV=1//7.52456e-57
	BnaC01g21240D	5.50688	6.64624	12.1957	12.6944	UP	FALSE	FALSE	UP	FIP2; FRIGIDA interacting protein 2	sp|Q9LJG8|ASIL2_ARATH Trihelix transcription factor ASIL2 OS=Arabidopsis thaliana GN=ASIL2 PE=2 SV=1//3.77182e-09
	BnaC01g37190D	0.262155	0.275387	2.40723	3.02757	UP	FALSE	FALSE	UP	sequence-specific DNA binding transcription factor	sp|Q9LJG8|ASIL2_ARATH Trihelix transcription factor ASIL2 OS=Arabidopsis thaliana GN=ASIL2 PE=2 SV=1//2.13328e-99
	BnaC02g33420D	2.04825	2.34221	4.69518	4.20408	UP	FALSE	FALSE	UP	DNA-binding protein-like protein	sp|Q39117|TGT2_ARATH Trihelix transcription factor GT-2 OS=Arabidopsis thaliana GN=GT-2 PE=2 SV=1//4.00044e-13
	BnaC02g35850D	4.60784	4.63286	5.54953	6.41286	UP	FALSE	FALSE	UP	trihelix transcription factor GT-4	sp|Q9LU92|TGT4_ARATH Trihelix transcription factor GT-4 OS=Arabidopsis thaliana GN=GT-4 PE=2 SV=1//0
	BnaC02g39470D	3.05668	3.64821	0.0577992	0.127829	DOWN	FALSE	FALSE	DOWN	trihelix transcription factor GTL2	sp|Q8H181|GTL2_ARATH Trihelix transcription factor GTL2 OS=Arabidopsis thaliana GN=At5g28300 PE=2 SV=1//0
	BnaC03g38340D	6.8881	7.33143	22.5054	19.6832	UP	FALSE	FALSE	UP	sequence-specific DNA binding transcription factor	sp|Q9LJG8|ASIL2_ARATH Trihelix transcription factor ASIL2 OS=Arabidopsis thaliana GN=ASIL2 PE=2 SV=1//2.40464e-122
	BnaC04g07120D	0.316545	0.340585	32.59	27.9577	UP	FALSE	FALSE	UP	trihelix transcription factor GT-3b	sp|O80450|TGT3B_ARATH Trihelix transcription factor GT-3b OS=Arabidopsis thaliana GN=GT-3B PE=1 SV=1//8.48445e-92
	BnaC05g42050D	11.7585	11.5204	39.9968	39.1564	UP	FALSE	FALSE	UP	sequence-specific DNA binding transcription factor	sp|Q9SYG2|ASIL1_ARATH Trihelix transcription factor ASIL1 OS=Arabidopsis thaliana GN=ASIL1 PE=1 SV=1//3.64859e-30
	BnaC05g43000D	3.1239	3.5735	6.74731	6.09015	UP	FALSE	FALSE	UP	aspartate/glutamate/uridylate kinase family protein	sp|Q7VD61|PYRH_PROMA Uridylate kinase OS=Prochlorococcus marinus (strain SARG / CCMP1375 / SS120) GN=pyrH PE=3 SV=1//3.22383e-56
	BnaC06g16720D	2.38617	2.56675	4.57316	4.15301	UP	FALSE	FALSE	UP	sequence-specific DNA binding transcription factor	sp|Q9LJG8|ASIL2_ARATH Trihelix transcription factor ASIL2 OS=Arabidopsis thaliana GN=ASIL2 PE=2 SV=1//1.83179e-24
	BnaC06g21580D	1.48273	2.51902	0.0929675	0.301949	DOWN	FALSE	FALSE	DOWN	hypothetical protein	-//-
	BnaC07g49430D	5.93916	6.52122	0.115644	0.290691	DOWN	FALSE	FALSE	DOWN	trihelix transcription factor GTL2	sp|Q8H181|GTL2_ARATH Trihelix transcription factor GTL2 OS=Arabidopsis thaliana GN=At5g28300 PE=2 SV=1//0
	BnaC08g25180D	4.66687	6.75731	2.21976	8.90742	UP	UP	FALSE	FALSE	sequence-specific DNA binding transcription factor	sp|Q9LJG8|ASIL2_ARATH Trihelix transcription factor ASIL2 OS=Arabidopsis thaliana GN=ASIL2 PE=2 SV=1//4.1732e-14
	BnaC08g40320D	7.28108	7.13155	13.0728	14.3035	UP	FALSE	FALSE	UP	trihelix transcription factor GT-1	sp|Q9FX53|TGT1_ARATH Trihelix transcription factor GT-1 OS=Arabidopsis thaliana GN=GT-1 PE=1 SV=1//0
	BnaCnng21880D	3.05247	3.7628	10.5091	10.6084	UP	FALSE	FALSE	UP	homeodomain-like superfamily protein	sp|Q9LJG8|ASIL2_ARATH Trihelix transcription factor ASIL2 OS=Arabidopsis thaliana GN=ASIL2 PE=2 SV=1//9.613e-08
TUB(15)	BnaA05g14540D	3.76744	3.95553	10.9628	10.3485	UP	FALSE	FALSE	UP	TLP7; tubby like protein 7	sp|Q93VI8|TLP7_ARATH Tubby-like F-box protein 7 OS=Arabidopsis thaliana GN=TULP7 PE=2 SV=1//0
	BnaA05g30970D	14.3381	13.9129	23.3892	28.8009	UP	FALSE	FALSE	UP	TLP9; tubby-like F-box protein 9	sp|Q9SQU1|TLP9_ARATH Tubby-like F-box protein 9 OS=Arabidopsis thaliana GN=TULP9 PE=1 SV=1//0
	BnaA06g10770D	0.514008	1.12209	0.0445058	0.0961914	DOWN	FALSE	FALSE	FALSE	TLP8; Tubby-like protein 8	sp|Q9S9M8|TLP8_ARATH Tubby-like protein 8 OS=Arabidopsis thaliana GN=TULP8 PE=2 SV=1//0
	BnaA07g36880D	5.57137	5.65914	11.3225	11.6966	UP	FALSE	FALSE	UP	TLP1; tubby-like F-box protein 1	sp|Q9FRH7|TLP10_ARATH Tubby-like F-box protein 10 OS=Arabidopsis thaliana GN=TULP10 PE=1 SV=1//0
	BnaA08g01170D	16.9702	18.0169	44.4073	42.8983	UP	FALSE	FALSE	UP	TLP7; tubby like protein 7	sp|Q93VI8|TLP7_ARATH Tubby-like F-box protein 7 OS=Arabidopsis thaliana GN=TULP7 PE=2 SV=1//0
	BnaA08g19290D	0.561987	0.577703	4.22684	4.38933	UP	FALSE	FALSE	UP	TLP1; tubby-like F-box protein 1	sp|Q9FRH7|TLP10_ARATH Tubby-like F-box protein 10 OS=Arabidopsis thaliana GN=TULP10 PE=1 SV=1//0
	BnaA10g16280D	12.5564	9.2556	16.3491	15.5574	UP	FALSE	FALSE	UP	TLP11; Tubby-like F-box protein 11	sp|Q6NPQ1|TLP11_ARATH Tubby-like F-box protein 11 OS=Arabidopsis thaliana GN=TULP11 PE=2 SV=1//0
	BnaC03g69560D	11.58	10.033	18.3287	18.2164	UP	FALSE	FALSE	UP	TLP7; tubby like protein 7	sp|Q93VI8|TLP7_ARATH Tubby-like F-box protein 7 OS=Arabidopsis thaliana GN=TULP7 PE=2 SV=1//0
	BnaC03g75660D	2.98158	3.44598	9.12497	10.2908	UP	FALSE	FALSE	UP	TLP1; tubby-like F-box protein 1	sp|Q9FRH7|TLP10_ARATH Tubby-like F-box protein 10 OS=Arabidopsis thaliana GN=TULP10 PE=1 SV=1//0
	BnaC05g45450D	0.690969	0.706771	1.14264	1.32243	UP	FALSE	FALSE	UP	TLP9; tubby-like F-box protein 9	sp|Q9SQU1|TLP9_ARATH Tubby-like F-box protein 9 OS=Arabidopsis thaliana GN=TULP9 PE=1 SV=1//0
	BnaC06g09960D	2.43763	2.50471	3.63009	5.29805	UP	FALSE	FALSE	UP	TLP7; tubby like protein 7	sp|Q93VI8|TLP7_ARATH Tubby-like F-box protein 7 OS=Arabidopsis thaliana GN=TULP7 PE=2 SV=1//0
	BnaC09g39120D	10.4037	10.5702	24.2064	21.4956	UP	FALSE	FALSE	UP	TLP11; Tubby-like F-box protein 11	sp|Q6NPQ1|TLP11_ARATH Tubby-like F-box protein 11 OS=Arabidopsis thaliana GN=TULP11 PE=2 SV=1//4.43759e-133
	BnaC09g39130D	23.1853	21.7118	38.0707	40.8413	UP	FALSE	FALSE	UP	TLP11; Tubby-like F-box protein 11	sp|Q6NPQ1|TLP11_ARATH Tubby-like F-box protein 11 OS=Arabidopsis thaliana GN=TULP11 PE=2 SV=1//1.22631e-14
	BnaCnng48830D	5.35227	5.10024	7.28705	8.35887	UP	FALSE	FALSE	UP	TLP1; tubby-like F-box protein 1	sp|Q9ZP59|TLP1_ARATH Tubby-like F-box protein 1 OS=Arabidopsis thaliana GN=TULP1 PE=2 SV=1//0
	BnaCnng51010D	11.1264	11.7924	25.0256	23.6042	UP	FALSE	FALSE	UP	TLP1; tubby-like F-box protein 1	sp|Q9FRH7|TLP10_ARATH Tubby-like F-box protein 10 OS=Arabidopsis thaliana GN=TULP10 PE=1 SV=1//0
VOZ(5)	BnaA05g02850D	4.53137	4.65504	6.97523	6.85728	UP	FALSE	FALSE	UP	VOZ2; vascular plant one zinc finger protein 2	sp|Q9SLB9|VOZ2_ARATH Transcription factor VOZ2 OS=Arabidopsis thaliana GN=VOZ2 PE=1 SV=2//0
	BnaA09g27210D	7.02664	7.41925	11.3121	10.8514	UP	FALSE	FALSE	UP	VOZ1; vascular plant one zinc finger protein	sp|Q9SGQ0|VOZ1_ARATH Transcription factor VOZ1 OS=Arabidopsis thaliana GN=VOZ1 PE=1 SV=1//0
	BnaC03g58740D	4.42667	4.83352	58.6033	34.8407	UP	DOWN	FALSE	UP	VOZ1; vascular plant one zinc finger protein	sp|Q9SGQ0|VOZ1_ARATH Transcription factor VOZ1 OS=Arabidopsis thaliana GN=VOZ1 PE=1 SV=1//0
	BnaC04g48260D	2.30025	2.45782	6.0104	5.4587	UP	FALSE	FALSE	UP	VOZ2; vascular plant one zinc finger protein 2	sp|Q9SLB9|VOZ2_ARATH Transcription factor VOZ2 OS=Arabidopsis thaliana GN=VOZ2 PE=1 SV=2//0
	BnaC04g52750D	4.20954	4.58558	7.7387	7.48568	UP	FALSE	FALSE	UP	VOZ2; vascular plant one zinc finger protein 2	sp|Q9SLB9|VOZ2_ARATH Transcription factor VOZ2 OS=Arabidopsis thaliana GN=VOZ2 PE=1 SV=2//0
WRKY(71)	BnaA01g05060D	0.518161	0.353335	12.1567	18.2308	UP	FALSE	FALSE	UP	WRKY18; WRKY DNA-binding protein 18	sp|Q9C5T4|WRK18_ARATH WRKY transcription factor 18 OS=Arabidopsis thaliana GN=WRKY18 PE=1 SV=2//4.23103e-149
	BnaA01g08990D	0.4597	0.845771	3.43816	4.2729	UP	FALSE	FALSE	UP	WRKY28; WRKY DNA-binding protein 28	sp|Q8VWJ2|WRK28_ARATH Probable WRKY transcription factor 28 OS=Arabidopsis thaliana GN=WRKY28 PE=2 SV=1//3.56875e-147
	BnaA01g13440D	0.640169	0.511142	1.54707	3.05453	UP	FALSE	FALSE	UP	WRKY53; putative WRKY transcription factor 53	sp|Q9SUP6|WRK53_ARATH Probable WRKY transcription factor 53 OS=Arabidopsis thaliana GN=WRKY53 PE=1 SV=1//2.07519e-133
	BnaA01g34790D	4.71424	4.60002	16.3844	16.695	UP	FALSE	FALSE	UP	WRKY11; putative WRKY transcription factor 11	sp|Q9SV15|WRK11_ARATH Probable WRKY transcription factor 11 OS=Arabidopsis thaliana GN=WRKY11 PE=2 SV=2//2.51117e-169
	BnaA02g21850D	0.0471912	0.0338148	0.90844	1.49529	UP	FALSE	FALSE	UP	WRKY41; putative WRKY transcription factor 41	sp|Q8H0Y8|WRK41_ARATH Probable WRKY transcription factor 41 OS=Arabidopsis thaliana GN=WRKY41 PE=2 SV=2//1.00882e-148
	BnaA02g24470D	0.0342777	0.0869357	1.37653	2.69946	UP	FALSE	FALSE	UP	WRKY8; putative WRKY transcription factor 8	sp|Q9FL26|WRKY8_ARATH Probable WRKY transcription factor 8 OS=Arabidopsis thaliana GN=WRKY8 PE=1 SV=1//8.97098e-126
	BnaA02g36910D	2.87284	3.34282	12.8532	11.3348	UP	FALSE	FALSE	UP	WRKY3; WRKY DNA-binding protein 3	sp|Q9ZQ70|WRKY3_ARATH Probable WRKY transcription factor 3 OS=Arabidopsis thaliana GN=WRKY3 PE=2 SV=1//3.39442e-10
	BnaA03g05230D	0.760945	2.04372	2.33096	3.91105	UP	FALSE	UP	UP	WRKY72; putative WRKY transcription factor 72	sp|Q9LXG8|WRK72_ARATH Probable WRKY transcription factor 72 OS=Arabidopsis thaliana GN=WRKY72 PE=2 SV=1//0
	BnaA03g13820D	0.118701	0.0737358	1.68097	2.49732	UP	FALSE	FALSE	UP	WRKY25; WRKY transcription factor 25; K13423 WRKY transcription factor 25	sp|O22921|WRK25_ARATH Probable WRKY transcription factor 25 OS=Arabidopsis thaliana GN=WRKY25 PE=1 SV=1//0
	BnaA03g17820D	0.324724	0.165253	27.4921	39.7341	UP	FALSE	FALSE	UP	WRKY33; putative WRKY transcription factor 33; K13424 WRKY transcription factor 33	sp|Q8S8P5|WRK33_ARATH Probable WRKY transcription factor 33 OS=Arabidopsis thaliana GN=WRKY33 PE=1 SV=2//2.46541e-178
	BnaA03g28720D	4.27111	4.60952	0.5672	1.25572	DOWN	FALSE	FALSE	DOWN	WRKY74; WRKY transcription factor 74	sp|Q9SR07|WRK39_ARATH Probable WRKY transcription factor 39 OS=Arabidopsis thaliana GN=WRKY39 PE=2 SV=1//1.98247e-158
	BnaA03g43640D	0.0768088	0.178813	1.61644	3.94094	UP	UP	FALSE	UP	WRKY28; WRKY DNA-binding protein 28	sp|Q8VWJ2|WRK28_ARATH Probable WRKY transcription factor 28 OS=Arabidopsis thaliana GN=WRKY28 PE=2 SV=1//8.93851e-164
	BnaA03g46550D	2.41195	2.54196	9.41696	12.3577	UP	FALSE	FALSE	UP	WRKY7; WRKY transcription factor-like calmodulin binding protein	sp|Q9STX0|WRKY7_ARATH Probable WRKY transcription factor 7 OS=Arabidopsis thaliana GN=WRKY7 PE=2 SV=1//2.12504e-154
	BnaA03g51590D	3.25604	2.60036	35.1391	35.5622	UP	FALSE	FALSE	UP	WRKY11; putative WRKY transcription factor 11	sp|Q9SV15|WRK11_ARATH Probable WRKY transcription factor 11 OS=Arabidopsis thaliana GN=WRKY11 PE=2 SV=2//6.79624e-151
	BnaA04g02560D	0.27822	0.0755129	1.2952	1.43623	UP	FALSE	FALSE	UP	WRKY70; WRKY transcription factor 70	sp|Q9LY00|WRK70_ARATH Probable WRKY transcription factor 70 OS=Arabidopsis thaliana GN=WRKY70 PE=2 SV=1//7.8076e-114
	BnaA04g13570D	3.64847	3.87353	143.877	157.662	UP	FALSE	FALSE	UP	WRKY15; WRKY DNA-binding protein 15	sp|O22176|WRK15_ARATH Probable WRKY transcription factor 15 OS=Arabidopsis thaliana GN=WRKY15 PE=2 SV=1//8.70044e-135
	BnaA04g14500D	4.61926	4.02711	9.81672	9.90081	UP	FALSE	FALSE	UP	WRKY17; putative WRKY transcription factor 17	sp|Q9SJA8|WRK17_ARATH Probable WRKY transcription factor 17 OS=Arabidopsis thaliana GN=WRKY17 PE=2 SV=2//3.16028e-154
	BnaA04g17420D	0.561323	0.585844	23.9719	30.5719	UP	FALSE	FALSE	UP	WRKY25; WRKY transcription factor 25; K13423 WRKY transcription factor 25	sp|O22921|WRK25_ARATH Probable WRKY transcription factor 25 OS=Arabidopsis thaliana GN=WRKY25 PE=1 SV=1//1.42303e-176
	BnaA04g22040D	0.0924329	0.10425	6.80608	15.2677	UP	UP	FALSE	UP	WRKY33; putative WRKY transcription factor 33; K13424 WRKY transcription factor 33	sp|Q8S8P5|WRK33_ARATH Probable WRKY transcription factor 33 OS=Arabidopsis thaliana GN=WRKY33 PE=1 SV=2//0
	BnaA05g12160D	0.765099	0.666873	4.62474	6.02706	UP	FALSE	FALSE	UP	WRKY25; WRKY transcription factor 25; K13423 WRKY transcription factor 25	sp|O22921|WRK25_ARATH Probable WRKY transcription factor 25 OS=Arabidopsis thaliana GN=WRKY25 PE=1 SV=1//0
	BnaA05g34850D	0.890215	0.649246	177.533	242.256	UP	FALSE	FALSE	UP	WRKY33; putative WRKY transcription factor 33; K13424 WRKY transcription factor 33	sp|Q8S8P5|WRK33_ARATH Probable WRKY transcription factor 33 OS=Arabidopsis thaliana GN=WRKY33 PE=1 SV=2//0
	BnaA06g08890D	5.39859	5.42315	22.0767	21.5716	UP	FALSE	FALSE	UP	WRKY4; putative WRKY transcription factor 4	sp|Q9XI90|WRKY4_ARATH Probable WRKY transcription factor 4 OS=Arabidopsis thaliana GN=WRKY4 PE=1 SV=2//0
	BnaA06g28100D	0.670663	0.78256	25.9042	25.0727	UP	FALSE	FALSE	UP	WRKY50; putative WRKY transcription factor 50	sp|Q8VWQ5|WRK50_ARATH Probable WRKY transcription factor 50 OS=Arabidopsis thaliana GN=WRKY50 PE=2 SV=1//3.96238e-71
	BnaA06g33730D	6.88688	6.62691	10.6834	11.0251	UP	FALSE	FALSE	UP	WRKY3; WRKY DNA-binding protein 3	sp|Q9ZQ70|WRKY3_ARATH Probable WRKY transcription factor 3 OS=Arabidopsis thaliana GN=WRKY3 PE=2 SV=1//0
	BnaA07g16850D	1.92451	0.599277	1.19937	1.94808	UP	FALSE	DOWN	FALSE	WRKY70; WRKY transcription factor 70	sp|Q9LY00|WRK70_ARATH Probable WRKY transcription factor 70 OS=Arabidopsis thaliana GN=WRKY70 PE=2 SV=1//4.3284e-118
	BnaA07g20110D	0.0175251	0.0178786	1.18131	5.43428	UP	UP	FALSE	UP	WRKY40; putative WRKY transcription factor 40	sp|Q9SAH7|WRK40_ARATH Probable WRKY transcription factor 40 OS=Arabidopsis thaliana GN=WRKY40 PE=1 SV=1//1.54488e-176
	BnaA07g28340D	2.05839	2.99693	4.07998	4.31194	UP	FALSE	FALSE	UP	Cystathionine beta-synthase (CBS) protein	sp|Q9CAR3|KINGL_ARATH SNF1-related protein kinase regulatory subunit gamma-1-like OS=Arabidopsis thaliana GN=CBSCBS2 PE=1 SV=1//1.47248e-54
	BnaA07g35260D	0.725921	0.499919	142.401	191.231	UP	FALSE	FALSE	UP	WRKY40; putative WRKY transcription factor 40	sp|Q9SAH7|WRK40_ARATH Probable WRKY transcription factor 40 OS=Arabidopsis thaliana GN=WRKY40 PE=1 SV=1//7.02816e-173
	BnaA08g08590D	0.0578096	0.0375974	3.17074	2.70379	UP	FALSE	FALSE	UP	WRKY28; WRKY DNA-binding protein 28	sp|Q8VWJ2|WRK28_ARATH Probable WRKY transcription factor 28 OS=Arabidopsis thaliana GN=WRKY28 PE=2 SV=1//2.35614e-141
	BnaA08g12420D	2.07608	2.26839	88.6437	120.191	UP	FALSE	FALSE	UP	WRKY11; putative WRKY transcription factor 11	sp|Q9SV15|WRK11_ARATH Probable WRKY transcription factor 11 OS=Arabidopsis thaliana GN=WRKY11 PE=2 SV=2//8.18697e-154
	BnaA08g24160D	0.54824	0.474518	2.92753	3.50235	UP	FALSE	FALSE	UP	WRKY4; putative WRKY transcription factor 4	sp|Q9XI90|WRKY4_ARATH Probable WRKY transcription factor 4 OS=Arabidopsis thaliana GN=WRKY4 PE=1 SV=2//0
	BnaA09g00120D	2.00397	2.39545	5.25921	8.38969	UP	FALSE	FALSE	UP	WRKY22; WRKY transcription factor 22; K13425 WRKY transcription factor 22	sp|O04609|WRK22_ARATH WRKY transcription factor 22 OS=Arabidopsis thaliana GN=WRKY22 PE=2 SV=1//2.3107e-162
	BnaA09g13370D	1.45611	0.925697	70.2009	87.2206	UP	FALSE	FALSE	UP	WRKY6; WRKY transcription factor 6	sp|Q9C519|WRKY6_ARATH WRKY transcription factor 6 OS=Arabidopsis thaliana GN=WRKY6 PE=1 SV=1//0
	BnaA09g35840D	9.38453	5.48855	10.2248	13.9601	UP	FALSE	DOWN	UP	WRKY70; WRKY transcription factor 70	sp|Q9LY00|WRK70_ARATH Probable WRKY transcription factor 70 OS=Arabidopsis thaliana GN=WRKY70 PE=2 SV=1//2.30948e-96
	BnaA09g45940D	1.65585	1.67703	15.3421	12.2633	UP	FALSE	FALSE	UP	WRKY4; putative WRKY transcription factor 4	sp|Q9XI90|WRKY4_ARATH Probable WRKY transcription factor 4 OS=Arabidopsis thaliana GN=WRKY4 PE=1 SV=2//1.10324e-19
	BnaA10g10500D	3.72695	4.12547	12.8678	9.3295	UP	DOWN	FALSE	UP	WRKY2; putative WRKY transcription factor 2; K18835 WRKY transcription factor 2	sp|Q9FG77|WRKY2_ARATH Probable WRKY transcription factor 2 OS=Arabidopsis thaliana GN=WRKY2 PE=2 SV=1//2.48185e-13
	BnaAnng23990D	0.462435	0.20537	4.83971	14.4646	UP	UP	FALSE	UP	WRKY40; putative WRKY transcription factor 40	sp|Q9SAH7|WRK40_ARATH Probable WRKY transcription factor 40 OS=Arabidopsis thaliana GN=WRKY40 PE=1 SV=1//1.06578e-172
	BnaAnng32610D	0.383427	0.515974	6.87073	9.855	UP	FALSE	FALSE	UP	WRKY18; WRKY DNA-binding protein 18	sp|Q9C5T4|WRK18_ARATH WRKY transcription factor 18 OS=Arabidopsis thaliana GN=WRKY18 PE=1 SV=2//1.83873e-146
	BnaC01g06900D	7.22403	5.59131	10.8838	10.9709	UP	FALSE	FALSE	UP	WRKY11; putative WRKY transcription factor 11	sp|Q9SV15|WRK11_ARATH Probable WRKY transcription factor 11 OS=Arabidopsis thaliana GN=WRKY11 PE=2 SV=2//1.47319e-156
	BnaC01g10570D	0.221881	0.105346	1.32553	2.20863	UP	FALSE	FALSE	UP	WRKY28; WRKY DNA-binding protein 28	sp|Q8VWJ2|WRK28_ARATH Probable WRKY transcription factor 28 OS=Arabidopsis thaliana GN=WRKY28 PE=2 SV=1//1.81612e-139
	BnaC01g13500D	0.0788341	0.0540829	17.3599	29.5235	UP	FALSE	FALSE	UP	WRKY31; WRKY DNA-binding protein 31	sp|Q93WT0|WRK31_ARATH Probable WRKY transcription factor 31 OS=Arabidopsis thaliana GN=WRKY31 PE=2 SV=1//0
	BnaC01g15640D	1.41731	1.07772	2.757	3.85188	UP	FALSE	FALSE	UP	WRKY53; putative WRKY transcription factor 53	sp|Q9SUP6|WRK53_ARATH Probable WRKY transcription factor 53 OS=Arabidopsis thaliana GN=WRKY53 PE=1 SV=1//2.34758e-137
	BnaC01g16120D	3.65322	3.75988	4.62561	6.19779	UP	FALSE	FALSE	UP	WRKY7; WRKY transcription factor-like calmodulin binding protein	sp|Q9STX0|WRKY7_ARATH Probable WRKY transcription factor 7 OS=Arabidopsis thaliana GN=WRKY7 PE=2 SV=1//4.64641e-158
	BnaC02g26030D	0.630144	0.377014	17.3028	41.2614	UP	UP	FALSE	UP	WRKY40; putative WRKY transcription factor 40	sp|Q9SAH7|WRK40_ARATH Probable WRKY transcription factor 40 OS=Arabidopsis thaliana GN=WRKY40 PE=1 SV=1//3.29936e-174
	BnaC03g16740D	0.102518	0.0440751	1.34758	1.73143	UP	FALSE	FALSE	UP	WRKY25; WRKY transcription factor 25; K13423 WRKY transcription factor 25	sp|O22921|WRK25_ARATH Probable WRKY transcription factor 25 OS=Arabidopsis thaliana GN=WRKY25 PE=1 SV=1//0
	BnaC03g21360D	1.33044	1.02272	142.611	201.176	UP	FALSE	FALSE	UP	WRKY33; putative WRKY transcription factor 33; K13424 WRKY transcription factor 33	sp|Q8S8P5|WRK33_ARATH Probable WRKY transcription factor 33 OS=Arabidopsis thaliana GN=WRKY33 PE=1 SV=2//0
	BnaC03g33830D	3.44136	4.77157	1.0444	2.45169	FALSE	UP	FALSE	DOWN	WRKY74; WRKY transcription factor 74	sp|Q9SR07|WRK39_ARATH Probable WRKY transcription factor 39 OS=Arabidopsis thaliana GN=WRKY39 PE=2 SV=1//1.26104e-161
	BnaC03g67520D	2.42513	2.68069	159.106	194.327	UP	FALSE	FALSE	UP	WRKY11; putative WRKY transcription factor 11	sp|Q9SV15|WRK11_ARATH Probable WRKY transcription factor 11 OS=Arabidopsis thaliana GN=WRKY11 PE=2 SV=2//2.1764e-136
	BnaC04g06800D	0.22215	0.384651	86.0948	93.0461	UP	FALSE	FALSE	UP	WRKY33; putative WRKY transcription factor 33; K13424 WRKY transcription factor 33	sp|Q8S8P5|WRK33_ARATH Probable WRKY transcription factor 33 OS=Arabidopsis thaliana GN=WRKY33 PE=1 SV=2//0
	BnaC04g14500D	0.0612713	0.180264	1.60655	4.38184	UP	UP	FALSE	UP	WRKY25; WRKY transcription factor 25; K13423 WRKY transcription factor 25	sp|O22921|WRK25_ARATH Probable WRKY transcription factor 25 OS=Arabidopsis thaliana GN=WRKY25 PE=1 SV=1//2.68985e-62
	BnaC04g35770D	1.68204	1.44057	155.83	164.66	UP	FALSE	FALSE	UP	WRKY15; WRKY DNA-binding protein 15	sp|O22176|WRK15_ARATH Probable WRKY transcription factor 15 OS=Arabidopsis thaliana GN=WRKY15 PE=2 SV=1//2.0765e-144
	BnaC04g36310D	2.32471	1.7858	36.8006	47.2453	UP	FALSE	FALSE	UP	WRKY17; putative WRKY transcription factor 17	sp|Q9SJA8|WRK17_ARATH Probable WRKY transcription factor 17 OS=Arabidopsis thaliana GN=WRKY17 PE=2 SV=2//4.50404e-115
	BnaC04g38910D	2.77389	4.66225	13.4715	17.8812	UP	FALSE	FALSE	UP	WRKY45; WRKY DNA-binding protein 45	sp|Q9S763|WRK45_ARATH Probable WRKY transcription factor 45 OS=Arabidopsis thaliana GN=WRKY45 PE=2 SV=1//1.10946e-65
	BnaC04g40940D	0.023462	0.0702063	10.2926	16.648	UP	FALSE	FALSE	UP	WRKY31; WRKY DNA-binding protein 31	sp|Q93WT0|WRK31_ARATH Probable WRKY transcription factor 31 OS=Arabidopsis thaliana GN=WRKY31 PE=2 SV=1//1.61661e-99
	BnaC04g41050D	0.827762	0.364347	16.4234	18.9702	UP	FALSE	FALSE	UP	WRKY25; WRKY transcription factor 25; K13423 WRKY transcription factor 25	sp|O22921|WRK25_ARATH Probable WRKY transcription factor 25 OS=Arabidopsis thaliana GN=WRKY25 PE=1 SV=1//4.29854e-174
	BnaC05g10200D	2.57412	2.27585	6.9466	7.36126	UP	FALSE	FALSE	UP	WRKY4; putative WRKY transcription factor 4	sp|Q9XI90|WRKY4_ARATH Probable WRKY transcription factor 4 OS=Arabidopsis thaliana GN=WRKY4 PE=1 SV=2//0
	BnaC05g47140D	0.287703	0.265564	0.816282	1.49766	UP	FALSE	FALSE	UP	WRKY39; putative WRKY transcription factor 39	sp|Q9SR07|WRK39_ARATH Probable WRKY transcription factor 39 OS=Arabidopsis thaliana GN=WRKY39 PE=2 SV=1//4.92199e-176
	BnaC06g15910D	1.38244	0.505954	1.211	2.25829	UP	FALSE	FALSE	FALSE	WRKY70; WRKY transcription factor 70	sp|Q9LY00|WRK70_ARATH Probable WRKY transcription factor 70 OS=Arabidopsis thaliana GN=WRKY70 PE=2 SV=1//1.78858e-116
	BnaC06g40170D	0.632293	0.331926	22.9048	36.8317	UP	FALSE	FALSE	UP	WRKY40; putative WRKY transcription factor 40	sp|Q9SAH7|WRK40_ARATH Probable WRKY transcription factor 40 OS=Arabidopsis thaliana GN=WRKY40 PE=1 SV=1//2.54397e-167
	BnaC07g22240D	4.95737	4.40437	16.1763	13.6697	UP	FALSE	FALSE	UP	WRKY3; WRKY DNA-binding protein 3	sp|Q9ZQ70|WRKY3_ARATH Probable WRKY transcription factor 3 OS=Arabidopsis thaliana GN=WRKY3 PE=2 SV=1//0
	BnaC07g27240D	0.0829415	0.225731	1.21426	1.02977	UP	FALSE	FALSE	UP	WRKY48; putative WRKY transcription factor 48	sp|Q9FGZ4|WRK48_ARATH Probable WRKY transcription factor 48 OS=Arabidopsis thaliana GN=WRKY48 PE=2 SV=1//3.64506e-145
	BnaC07g35130D	0.751729	0.58418	11.7065	16.225	UP	FALSE	FALSE	UP	WRKY28; WRKY DNA-binding protein 28	sp|Q8VWJ2|WRK28_ARATH Probable WRKY transcription factor 28 OS=Arabidopsis thaliana GN=WRKY28 PE=2 SV=1//4.17952e-165
	BnaC07g38840D	1.71255	1.89016	7.00766	8.78094	UP	FALSE	FALSE	UP	WRKY7; WRKY transcription factor-like calmodulin binding protein	sp|Q9STX0|WRKY7_ARATH Probable WRKY transcription factor 7 OS=Arabidopsis thaliana GN=WRKY7 PE=2 SV=1//4.16439e-155
	BnaC07g43320D	5.67152	4.31919	109.423	53.7625	UP	DOWN	FALSE	UP	WRKY11; putative WRKY transcription factor 11	sp|Q9SV15|WRK11_ARATH Probable WRKY transcription factor 11 OS=Arabidopsis thaliana GN=WRKY11 PE=2 SV=2//1.25173e-148
	BnaC07g43490D	3.1479	3.27375	58.5433	79.8695	UP	FALSE	FALSE	UP	WRKY18; WRKY DNA-binding protein 18	sp|Q9C5T4|WRK18_ARATH WRKY transcription factor 18 OS=Arabidopsis thaliana GN=WRKY18 PE=1 SV=2//1.48378e-146
	BnaC07g49530D	0.0694161	0.157886	5.64275	6.09457	UP	FALSE	FALSE	UP	WRKY50; putative WRKY transcription factor 50	sp|Q8VWQ5|WRK50_ARATH Probable WRKY transcription factor 50 OS=Arabidopsis thaliana GN=WRKY50 PE=2 SV=1//5.14309e-71
	BnaC08g27340D	2.85269	0.974678	2.72492	3.31923	UP	FALSE	FALSE	FALSE	WRKY70; WRKY transcription factor 70	sp|Q9LY00|WRK70_ARATH Probable WRKY transcription factor 70 OS=Arabidopsis thaliana GN=WRKY70 PE=2 SV=1//1.41928e-88
	BnaC08g40010D	2.1654	2.46209	9.49542	6.89384	UP	DOWN	FALSE	UP	WRKY4; putative WRKY transcription factor 4	sp|Q9XI90|WRKY4_ARATH Probable WRKY transcription factor 4 OS=Arabidopsis thaliana GN=WRKY4 PE=1 SV=2//2.40977e-22
	BnaC09g13680D	1.33781	0.871984	157.509	160.064	UP	FALSE	FALSE	UP	WRKY6; WRKY transcription factor 6	sp|Q9C519|WRKY6_ARATH WRKY transcription factor 6 OS=Arabidopsis thaliana GN=WRKY6 PE=1 SV=1//0
	BnaC09g17450D	1.86354	1.69437	0.0169623	0.0742079	DOWN	FALSE	FALSE	DOWN	WRKY49; putative WRKY transcription factor 49	sp|Q9FHR7|WRK49_ARATH Probable WRKY transcription factor 49 OS=Arabidopsis thaliana GN=WRKY49 PE=2 SV=1//6.46471e-108
	BnaCnng66020D	0.111162	0.151844	14.915	32.8733	UP	UP	FALSE	UP	WRKY33; putative WRKY transcription factor 33; K13424 WRKY transcription factor 33	sp|Q8S8P5|WRK33_ARATH Probable WRKY transcription factor 33 OS=Arabidopsis thaliana GN=WRKY33 PE=1 SV=2//0
zf-HD(11)	BnaA07g31990D	6.92316	10.0481	0.455624	1.08657	DOWN	FALSE	FALSE	DOWN	HB33; homeobox protein 33	sp|Q9FRL5|ZHD5_ARATH Zinc-finger homeodomain protein 5 OS=Arabidopsis thaliana GN=ZHD5 PE=1 SV=1//3.39993e-105
	BnaA09g31550D	4.16907	6.36162	0.0760989	0.192639	DOWN	FALSE	FALSE	DOWN	HB28; homeobox protein 28	sp|Q9SVL0|ZHD7_ARATH Zinc-finger homeodomain protein 7 OS=Arabidopsis thaliana GN=ZHD7 PE=1 SV=1//3.0842e-91
	BnaA09g52500D	2.92858	3.90452	0.147385	0.557604	DOWN	FALSE	FALSE	DOWN	HB25; homeobox protein 25	sp|Q9FKP8|ZHD1_ARATH Zinc-finger homeodomain protein 1 OS=Arabidopsis thaliana GN=ZHD1 PE=1 SV=1//3.15232e-102
	BnaA09g57080D	17.4353	20.8579	0.0928765	0.262028	DOWN	FALSE	FALSE	DOWN	HB31; homeobox protein 31	sp|Q9M9S0|ZHD4_ARATH Zinc-finger homeodomain protein 4 OS=Arabidopsis thaliana GN=ZHD4 PE=1 SV=1//1.35903e-157
	BnaA10g18900D	16.9531	16.4901	0.355926	0.794407	DOWN	FALSE	FALSE	DOWN	HB30; zinc finger homeodomain transcriptional factor ZFHD3	sp|Q9LXG0|ZHD8_ARATH Zinc-finger homeodomain protein 8 OS=Arabidopsis thaliana GN=ZHD8 PE=1 SV=1//1.28117e-106
	BnaAnng04880D	6.08054	6.36814	0.261298	0.648781	DOWN	FALSE	FALSE	DOWN	HB25; homeobox protein 25	sp|Q9FKP8|ZHD1_ARATH Zinc-finger homeodomain protein 1 OS=Arabidopsis thaliana GN=ZHD1 PE=1 SV=1//1.20744e-103
	BnaC02g19350D	2.49587	2.04585	0.318527	0.945749	FALSE	FALSE	FALSE	DOWN	ZFHD1; transcriptional factor ZFHD1	sp|Q9SEZ1|ZHD11_ARATH Zinc-finger homeodomain protein 11 OS=Arabidopsis thaliana GN=ZHD11 PE=1 SV=1//1.35205e-119
	BnaC02g43770D	6.69571	8.44728	0.259877	0.998698	DOWN	FALSE	FALSE	DOWN	HB25; homeobox protein 25	sp|Q9FKP8|ZHD1_ARATH Zinc-finger homeodomain protein 1 OS=Arabidopsis thaliana GN=ZHD1 PE=1 SV=1//2.05681e-99
	BnaC06g28000D	1.60273	1.68778	4.40203	4.68134	UP	FALSE	FALSE	UP	ZFHD1; transcriptional factor ZFHD1	sp|Q9SEZ1|ZHD11_ARATH Zinc-finger homeodomain protein 11 OS=Arabidopsis thaliana GN=ZHD11 PE=1 SV=1//1.87232e-121
	BnaC07g31930D	2.61086	3.56594	0.0226853	0.097416	DOWN	FALSE	FALSE	DOWN	HB28; homeobox protein 28	sp|Q9SVL0|ZHD7_ARATH Zinc-finger homeodomain protein 7 OS=Arabidopsis thaliana GN=ZHD7 PE=1 SV=1//3.94935e-121
	BnaCnng08060D	8.63471	10.1644	0.259123	0.847922	DOWN	FALSE	FALSE	DOWN	HB33; homeobox protein 33	sp|Q9FRL5|ZHD5_ARATH Zinc-finger homeodomain protein 5 OS=Arabidopsis thaliana GN=ZHD5 PE=1 SV=1//3.08833e-93

## Sheet: Table S3
Table S3a	DEGs related to ABA catabolism and biosynthesis
Function	Gene_id	WT_group_fpkm	OE_group_fpkm	WT_ABA_group_fpkm	OE_ABA_group_fpkm	significant(OE_ABAvsOE)	significant(OE_ABAvsWT_ABA)	significant(OEvsWT)	significant(WT_ABAvsWT)	KEGG AnnotInfo	Blast swiss prot
ABA biosynthesis	BnaA07g12170D	37.2827	36.4161	76.9749	73.0759	UP	FALSE	FALSE	UP	ABA1; zeaxanthin epoxidase; K09838 zeaxanthin epoxidase [EC:1.14.13.90]	sp|Q9FGC7|ZEP_ARATH Zeaxanthin epoxidase, chloroplastic OS=Arabidopsis thaliana GN=ZEP PE=1 SV=1//0
	BnaA09g07610D	0.155492	0.197152	2.94492	2.3909	UP	FALSE	FALSE	UP	ABA1; zeaxanthin epoxidase; K09838 zeaxanthin epoxidase [EC:1.14.13.90]	sp|Q9FGC7|ZEP_ARATH Zeaxanthin epoxidase, chloroplastic OS=Arabidopsis thaliana GN=ZEP PE=1 SV=1//0
	BnaC07g16350D	104.78	102.699	170.962	152.772	UP	FALSE	FALSE	UP	ABA1; zeaxanthin epoxidase; K09838 zeaxanthin epoxidase [EC:1.14.13.90]	sp|Q9FGC7|ZEP_ARATH Zeaxanthin epoxidase, chloroplastic OS=Arabidopsis thaliana GN=ZEP PE=1 SV=1//0
	BnaC09g07550D	2.07231	1.86361	46.2438	33.4549	UP	FALSE	FALSE	UP	ABA1; zeaxanthin epoxidase; K09838 zeaxanthin epoxidase [EC:1.14.13.90]	sp|Q9FGC7|ZEP_ARATH Zeaxanthin epoxidase, chloroplastic OS=Arabidopsis thaliana GN=ZEP PE=1 SV=1//0
	BnaA01g29390D	0.306623	0.179071	2.31403	2.84176	UP	FALSE	FALSE	UP	NCED3; 9-cis-epoxycarotenoid dioxygenase NCED3; K09840 9-cis-epoxycarotenoid dioxygenase [EC:1.13.11.51]	sp|Q9LRR7|NCED3_ARATH 9-cis-epoxycarotenoid dioxygenase NCED3, chloroplastic OS=Arabidopsis thaliana GN=NCED3 PE=2 SV=1//0
	BnaA05g25030D	0.614989	0.500424	4.35858	3.46887	UP	FALSE	FALSE	UP	NCED3; 9-cis-epoxycarotenoid dioxygenase NCED3; K09840 9-cis-epoxycarotenoid dioxygenase [EC:1.13.11.51]	sp|Q9LRR7|NCED3_ARATH 9-cis-epoxycarotenoid dioxygenase NCED3, chloroplastic OS=Arabidopsis thaliana GN=NCED3 PE=2 SV=1//0
	BnaC01g36910D	1.34423	1.03724	5.50137	4.79086	UP	FALSE	FALSE	UP	NCED3; 9-cis-epoxycarotenoid dioxygenase NCED3; K09840 9-cis-epoxycarotenoid dioxygenase [EC:1.13.11.51]	sp|Q9LRR7|NCED3_ARATH 9-cis-epoxycarotenoid dioxygenase NCED3, chloroplastic OS=Arabidopsis thaliana GN=NCED3 PE=2 SV=1//0
	BnaC05g39200D	1.05305	0.869342	24.1031	19.6879	UP	FALSE	FALSE	UP	NCED3; 9-cis-epoxycarotenoid dioxygenase NCED3; K09840 9-cis-epoxycarotenoid dioxygenase [EC:1.13.11.51]	sp|Q9LRR7|NCED3_ARATH 9-cis-epoxycarotenoid dioxygenase NCED3, chloroplastic OS=Arabidopsis thaliana GN=NCED3 PE=2 SV=1//0
	BnaCnng32080D	0.0858621	0.086348	1.69305	2.31158	UP	FALSE	FALSE	UP	NCED3; 9-cis-epoxycarotenoid dioxygenase NCED3; K09840 9-cis-epoxycarotenoid dioxygenase [EC:1.13.11.51]	sp|Q9LRR7|NCED3_ARATH 9-cis-epoxycarotenoid dioxygenase NCED3, chloroplastic OS=Arabidopsis thaliana GN=NCED3 PE=2 SV=1//0
	BnaCnng32090D	0	0	1.60347	3.66567	UP	FALSE	NA	UP	NCED3; 9-cis-epoxycarotenoid dioxygenase NCED3; K09840 9-cis-epoxycarotenoid dioxygenase [EC:1.13.11.51]	sp|Q9LRR7|NCED3_ARATH 9-cis-epoxycarotenoid dioxygenase NCED3, chloroplastic OS=Arabidopsis thaliana GN=NCED3 PE=2 SV=1//6.95593e-31
ABA catabolysis	BnaA04g16900D	7.37322	4.42796	21.7703	12.2034	UP	DOWN	DOWN	UP	CYP707A2; abscisic acid 8'-hydroxylase 2; K09843 (+)-abscisic acid 8'-hydroxylase [EC:1.14.13.93]	sp|O81077|ABAH2_ARATH Abscisic acid 8&apos;-hydroxylase 2 OS=Arabidopsis thaliana GN=CYP707A2 PE=2 SV=1//0
	BnaA03g43960D	0.881104	1.46726	123.182	67.7434	UP	DOWN	FALSE	UP	CYP707A1; abscisic acid 8'-hydroxylase 1; K09843 (+)-abscisic acid 8'-hydroxylase [EC:1.14.13.93]	sp|Q949P1|ABAH1_ARATH Abscisic acid 8&apos;-hydroxylase 1 OS=Arabidopsis thaliana GN=CYP707A1 PE=2 SV=1//0
	BnaC07g35800D	7.5075	9.5652	224.899	134.811	UP	DOWN	FALSE	UP	CYP707A1; abscisic acid 8'-hydroxylase 1; K09843 (+)-abscisic acid 8'-hydroxylase [EC:1.14.13.93]	sp|Q949P1|ABAH1_ARATH Abscisic acid 8&apos;-hydroxylase 1 OS=Arabidopsis thaliana GN=CYP707A1 PE=2 SV=1//0
	BnaA05g20890D	0.157771	0.213002	1.36042	0.909698	UP	FALSE	FALSE	UP	CYP707A4; abscisic acid 8'-hydroxylase 4; K09843 (+)-abscisic acid 8'-hydroxylase [EC:1.14.13.93]	sp|Q9LJK2|ABAH4_ARATH Abscisic acid 8&apos;-hydroxylase 4 OS=Arabidopsis thaliana GN=CYP707A4 PE=2 SV=2//0
Table S3b	DEGs related to ABA signaling pathway
Function	Gene_id	WT_group_fpkm	OE_group_fpkm	WT_ABA_group_fpkm	OE_ABA_group_fpkm	significant(OE_ABAvsOE)	significant(OE_ABAvsWT_ABA)	significant(OEvsWT)	significant(WT_ABAvsWT)	KEGG AnnotInfo	Blast swiss prot
ABA transporter	BnaA07g29760D	3.14616	3.01873	110.574	101.93	UP	FALSE	FALSE	UP	ABCG25; ABC transporter G family member 25	sp|Q84TH5|AB25G_ARATH ABC transporter G family member 25 OS=Arabidopsis thaliana GN=ABCG25 PE=2 SV=1//0
	BnaA07g29770D	0.905739	0.854591	56.4491	38.3248	UP	FALSE	FALSE	UP	ABCG25; ABC transporter G family member 25	sp|Q84TH5|AB25G_ARATH ABC transporter G family member 25 OS=Arabidopsis thaliana GN=ABCG25 PE=2 SV=1//0
	BnaC06g32970D	2.56156	2.5326	38.9279	36.9113	UP	FALSE	FALSE	UP	ABCG25; ABC transporter G family member 25	sp|Q84TH5|AB25G_ARATH ABC transporter G family member 25 OS=Arabidopsis thaliana GN=ABCG25 PE=2 SV=1//0
	BnaA10g24440D	8.41426	8.68154	78.5002	38.9787	UP	DOWN	FALSE	UP	ABC transporter G family member 22	sp|Q93YS4|AB22G_ARATH ABC transporter G family member 22 OS=Arabidopsis thaliana GN=ABCG22 PE=1 SV=1//0
	BnaC09g49020D	9.06434	7.85689	45.9109	28.5136	UP	DOWN	FALSE	UP	ABC transporter G family member 22	sp|Q93YS4|AB22G_ARATH ABC transporter G family member 22 OS=Arabidopsis thaliana GN=ABCG22 PE=1 SV=1//0
PP2C	BnaA10g11080D	4.5332	3.93862	364.754	239.143	UP	DOWN	FALSE	UP	ABI2; protein phosphatase 2C 77; K14497 protein phosphatase 2C [EC:3.1.3.16]	sp|O04719|P2C77_ARATH Protein phosphatase 2C 77 OS=Arabidopsis thaliana GN=ABI2 PE=1 SV=1//0
	BnaC09g53650D	3.19937	3.56799	164.378	100.819	UP	DOWN	FALSE	UP	ABI2; protein phosphatase 2C 77; K14497 protein phosphatase 2C [EC:3.1.3.16]	sp|O04719|P2C77_ARATH Protein phosphatase 2C 77 OS=Arabidopsis thaliana GN=ABI2 PE=1 SV=1//0
	BnaA10g15830D	8.72208	6.69477	14.487	12.5854	UP	FALSE	FALSE	UP	KAPP; kinase associated protein phosphatase; K01090 protein phosphatase [EC:3.1.3.16]	sp|P46014|P2C70_ARATH Protein phosphatase 2C 70 OS=Arabidopsis thaliana GN=KAPP PE=1 SV=2//0
	BnaC09g38410D	3.95762	3.61422	6.47558	6.18758	UP	FALSE	FALSE	UP	KAPP; kinase associated protein phosphatase; K01090 protein phosphatase [EC:3.1.3.16]	sp|P46014|P2C70_ARATH Protein phosphatase 2C 70 OS=Arabidopsis thaliana GN=KAPP PE=1 SV=2//0
	BnaA01g15250D	23.3558	20.8626	45.4021	38.0783	UP	FALSE	FALSE	UP	ABI1; protein phosphatase 2C 56; K14497 protein phosphatase 2C [EC:3.1.3.16]	sp|P49597|P2C56_ARATH Protein phosphatase 2C 56 OS=Arabidopsis thaliana GN=ABI1 PE=1 SV=2//0
	BnaA03g47830D	14.98	12.7774	203.987	204.422	UP	FALSE	FALSE	UP	ABI1; protein phosphatase 2C 56; K14497 protein phosphatase 2C [EC:3.1.3.16]	sp|P49597|P2C56_ARATH Protein phosphatase 2C 56 OS=Arabidopsis thaliana GN=ABI1 PE=1 SV=2//0
	BnaA08g14490D	6.23031	5.94568	5.69071	7.75418	UP	FALSE	FALSE	UP	ABI1; protein phosphatase 2C 56; K14497 protein phosphatase 2C [EC:3.1.3.16]	sp|P49597|P2C56_ARATH Protein phosphatase 2C 56 OS=Arabidopsis thaliana GN=ABI1 PE=1 SV=2//0
	BnaC01g18020D	37.1647	32.4202	107.947	73.3965	UP	DOWN	FALSE	UP	ABI1; protein phosphatase 2C 56; K14497 protein phosphatase 2C [EC:3.1.3.16]	sp|P49597|P2C56_ARATH Protein phosphatase 2C 56 OS=Arabidopsis thaliana GN=ABI1 PE=1 SV=2//0
	BnaC07g40100D	8.73666	8.5247	201.549	198.528	UP	FALSE	FALSE	UP	ABI1; protein phosphatase 2C 56; K14497 protein phosphatase 2C [EC:3.1.3.16]	sp|P49597|P2C56_ARATH Protein phosphatase 2C 56 OS=Arabidopsis thaliana GN=ABI1 PE=1 SV=2//0
	BnaA05g27660D	17.864	16.2423	402.925	372.819	UP	FALSE	FALSE	UP	PP2CA; protein phosphatase 2CA; K14497 protein phosphatase 2C [EC:3.1.3.16]	sp|P49598|P2C37_ARATH Protein phosphatase 2C 37 OS=Arabidopsis thaliana GN=PP2CA PE=1 SV=1//0
	BnaAnng23920D	12.5671	12.2228	127.91	120.984	UP	FALSE	FALSE	UP	PP2CA; protein phosphatase 2CA; K14497 protein phosphatase 2C [EC:3.1.3.16]	sp|P49598|P2C37_ARATH Protein phosphatase 2C 37 OS=Arabidopsis thaliana GN=PP2CA PE=1 SV=1//0
	BnaC05g41830D	21.0946	20.0638	387.224	382.126	UP	FALSE	FALSE	UP	PP2CA; protein phosphatase 2CA; K14497 protein phosphatase 2C [EC:3.1.3.16]	sp|P49598|P2C37_ARATH Protein phosphatase 2C 37 OS=Arabidopsis thaliana GN=PP2CA PE=1 SV=1//0
	BnaA01g37370D	5.85123	5.07577	67.453	58.7783	UP	FALSE	FALSE	UP	PP2CA; protein phosphatase 2CA; K14497 protein phosphatase 2C [EC:3.1.3.16]	sp|P49598|P2C37_ARATH Protein phosphatase 2C 37 OS=Arabidopsis thaliana GN=PP2CA PE=1 SV=1//1.43791e-177
	BnaA10g06520D	11.0395	15.2566	0.781728	1.81862	DOWN	FALSE	FALSE	DOWN	RCAR3; regulatory component of ABA receptor 3; K14496 abscisic acid receptor PYR/PYL family	sp|Q9FGM1|PYL8_ARATH Abscisic acid receptor PYL8 OS=Arabidopsis thaliana GN=PYL8 PE=1 SV=1//4.93527e-116
	BnaC08g17440D	3.4095	3.70638	12.006	11.7831	UP	FALSE	FALSE	UP	HAB2; protein phosphatase 2C 7; K14497 protein phosphatase 2C [EC:3.1.3.16]	sp|Q9LNP9|P2C07_ARATH Protein phosphatase 2C 7 OS=Arabidopsis thaliana GN=HAB2 PE=1 SV=2//1.22818e-15
	BnaA09g49440D	0.557714	0.748672	249.754	233.324	UP	FALSE	FALSE	UP	HAI2; protein phosphatase 2C 3; K14497 protein phosphatase 2C [EC:3.1.3.16]	sp|Q9LNW3|P2C03_ARATH Protein phosphatase 2C 3 OS=Arabidopsis thaliana GN=AIP1 PE=1 SV=1//0
	BnaA10g04840D	0.4615	0.71523	90.0451	97.0981	UP	FALSE	FALSE	UP	HAI2; protein phosphatase 2C 3; K14497 protein phosphatase 2C [EC:3.1.3.16]	sp|Q9LNW3|P2C03_ARATH Protein phosphatase 2C 3 OS=Arabidopsis thaliana GN=AIP1 PE=1 SV=1//0
	BnaC05g05180D	0.855344	0.825989	80.1186	80.2408	UP	FALSE	FALSE	UP	HAI2; protein phosphatase 2C 3; K14497 protein phosphatase 2C [EC:3.1.3.16]	sp|Q9LNW3|P2C03_ARATH Protein phosphatase 2C 3 OS=Arabidopsis thaliana GN=AIP1 PE=1 SV=1//2.19142e-161
PYL/RCAR	BnaC03g31730D	29.8862	21.2857	77.0291	121.399	UP	UP	FALSE	UP	PYL7; abscisic acid receptor PYL7; K14496 abscisic acid receptor PYR/PYL family	sp|Q1ECF1|PYL7_ARATH Abscisic acid receptor PYL7 OS=Arabidopsis thaliana GN=PYL7 PE=1 SV=1//1.14093e-118
	BnaA03g26790D	21.7279	15.8895	62.6427	87.396	UP	FALSE	FALSE	UP	PYL7; abscisic acid receptor PYL7; K14496 abscisic acid receptor PYR/PYL family	sp|Q1ECF1|PYL7_ARATH Abscisic acid receptor PYL7 OS=Arabidopsis thaliana GN=PYL7 PE=1 SV=1//2.23837e-120
	BnaA07g38130D	1.56045	1.27836	1.05377	2.59836	UP	FALSE	FALSE	FALSE	RCAR1; regulatory component of ABA receptor 1; K14496 abscisic acid receptor PYR/PYL family	sp|Q84MC7|PYL9_ARATH Abscisic acid receptor PYL9 OS=Arabidopsis thaliana GN=PYL9 PE=1 SV=1//2.47209e-94
	BnaC06g17940D	5.83791	5.23733	4.06807	11.9314	UP	UP	FALSE	FALSE	RCAR1; regulatory component of ABA receptor 1; K14496 abscisic acid receptor PYR/PYL family	sp|Q84MC7|PYL9_ARATH Abscisic acid receptor PYL9 OS=Arabidopsis thaliana GN=PYL9 PE=1 SV=1//2.49256e-98
	BnaA10g00540D	6.21349	5.23807	2.29386	5.95459	UP	UP	FALSE	FALSE	RCAR1; regulatory component of ABA receptor 1; K14496 abscisic acid receptor PYR/PYL family	sp|Q84MC7|PYL9_ARATH Abscisic acid receptor PYL9 OS=Arabidopsis thaliana GN=PYL9 PE=1 SV=1//2.61235e-119
	BnaC04g47050D	0.764183	1.53043	1.56	1.29575	FALSE	FALSE	FALSE	UP	PYL6; abscisic acid receptor PYL6; K14496 abscisic acid receptor PYR/PYL family	sp|Q8S8E3|PYL6_ARATH Abscisic acid receptor PYL6 OS=Arabidopsis thaliana GN=PYL6 PE=1 SV=1//1.16611e-112
	BnaC03g22610D	2.2282	2.35506	0.0260775	0.116189	DOWN	FALSE	FALSE	DOWN	PYL6; abscisic acid receptor PYL6; K14496 abscisic acid receptor PYR/PYL family	sp|Q8S8E3|PYL6_ARATH Abscisic acid receptor PYL6 OS=Arabidopsis thaliana GN=PYL6 PE=1 SV=1//4.65212e-127
	BnaC04g04830D	0.249463	0.258947	1.12575	1.28682	UP	FALSE	FALSE	UP	PYL6; abscisic acid receptor PYL6; K14496 abscisic acid receptor PYR/PYL family	sp|Q8S8E3|PYL6_ARATH Abscisic acid receptor PYL6 OS=Arabidopsis thaliana GN=PYL6 PE=1 SV=1//6.85466e-106
	BnaA04g29300D	2.47919	2.41038	3.06506	3.51003	UP	FALSE	FALSE	FALSE	PYL6; abscisic acid receptor PYL6; K14496 abscisic acid receptor PYR/PYL family	sp|Q8S8E3|PYL6_ARATH Abscisic acid receptor PYL6 OS=Arabidopsis thaliana GN=PYL6 PE=1 SV=1//9.09179e-115
	BnaA10g24990D	0.953786	0.622375	6.76176	5.99109	UP	FALSE	FALSE	UP	PYL5; abscisic acid receptor PYL5; K14496 abscisic acid receptor PYR/PYL family	sp|Q9FLB1|PYL5_ARATH Abscisic acid receptor PYL5 OS=Arabidopsis thaliana GN=PYL5 PE=1 SV=1//1.00101e-141
	BnaC09g49910D	1.98113	2.65599	6.3907	5.16727	UP	FALSE	FALSE	UP	PYL5; abscisic acid receptor PYL5; K14496 abscisic acid receptor PYR/PYL family	sp|Q9FLB1|PYL5_ARATH Abscisic acid receptor PYL5 OS=Arabidopsis thaliana GN=PYL5 PE=1 SV=1//1.44135e-132
	BnaAnng40650D	1.34227	2.71432	1.51394	4.96741	UP	UP	FALSE	FALSE	PYL5; abscisic acid receptor PYL5; K14496 abscisic acid receptor PYR/PYL family	sp|Q9FLB1|PYL5_ARATH Abscisic acid receptor PYL5 OS=Arabidopsis thaliana GN=PYL5 PE=1 SV=1//5.85487e-138
	BnaC03g02130D	2.28152	0.0261167	3.57622	0	FALSE	DOWN	DOWN	UP	PYL5; abscisic acid receptor PYL5; K14496 abscisic acid receptor PYR/PYL family	sp|Q9FLB1|PYL5_ARATH Abscisic acid receptor PYL5 OS=Arabidopsis thaliana GN=PYL5 PE=1 SV=1//9.6153e-137
SnRK2	BnaA01g23120D	4.49872	4.12284	5.68627	5.04633	FALSE	FALSE	FALSE	UP	SNRK2.10; SNF1-related protein kinase 2.10; K14498 serine/threonine-protein kinase SRK2 [EC:2.7.11.1]	sp|Q9C958|SRK2B_ARATH Serine/threonine-protein kinase SRK2B OS=Arabidopsis thaliana GN=SRK2B PE=1 SV=1//0
	BnaC01g28850D	4.2774	4.85138	11.2909	8.60369	UP	DOWN	FALSE	UP	SNRK2.10; SNF1-related protein kinase 2.10; K14498 serine/threonine-protein kinase SRK2 [EC:2.7.11.1]	sp|Q9C958|SRK2B_ARATH Serine/threonine-protein kinase SRK2B OS=Arabidopsis thaliana GN=SRK2B PE=1 SV=1//0
	BnaC03g03700D	8.71042	3.84708	8.06597	6.59168	UP	FALSE	DOWN	UP	SNRK2.1; serine/threonine-protein kinase SRK2G; K14498 serine/threonine-protein kinase SRK2 [EC:2.7.11.1]	sp|P43292|SRK2G_ARATH Serine/threonine-protein kinase SRK2G OS=Arabidopsis thaliana GN=SRK2G PE=1 SV=2//0

## Sheet: Table S4
Table S4	DEGs annotated in ''inositol phosphate metabolism"
Gene_ID	WT_group_fpkm	OE_group_fpkm	WT_ABA_group_fpkm	OE_ABA_group_fpkm	significant(OE_ABAvsOE)	significant(OE_ABAvsWT_ABA)	significant(OEvsWT)	significant(WT_ABAvsWT)	KEGG AnnotInfo	Blast swiss prot
BnaA07g00980D	0.939273	0.105346	1.82658	0.602577	FALSE	DOWN	DOWN	UP	MIOX2; myo-inositol oxygenase 2; K00469 inositol oxygenase [EC:1.13.99.1]	sp|O82200|MIOX2_ARATH Inositol oxygenase 2 OS=Arabidopsis thaliana GN=MIOX2 PE=2 SV=2//0
BnaA09g08370D	17.2505	16.6106	28.3598	13.8514	UP	DOWN	FALSE	UP	ALDH6B2; Methylmalonate-semialdehyde dehydrogenase [acylating]; K00140 malonate-semialdehyde dehydrogenase (acetylating) / methylmalonate-semialdehyde dehydrogenase [EC:1.2.1.18 1.2.1.27]	sp|Q0WM29|MMSA_ARATH Methylmalonate-semialdehyde dehydrogenase [acylating], mitochondrial OS=Arabidopsis thaliana GN=ALDH6B2 PE=2 SV=2//0
BnaA09g23120D	4.50127	4.74484	5.76396	3.93875	FALSE	DOWN	FALSE	UP	FAB1D; putative 1-phosphatidylinositol-3-phosphate 5-kinase; K00921 1-phosphatidylinositol-3-phosphate 5-kinase [EC:2.7.1.150]	sp|Q9XID0|FAB1D_ARATH Putative 1-phosphatidylinositol-3-phosphate 5-kinase FAB1D OS=Arabidopsis thaliana GN=FAB1D PE=3 SV=1//0
BnaA10g29490D	2.62095	5.21381	0.167244	0.414939	DOWN	FALSE	UP	DOWN	PLC1; phosphoinositide phospholipase C 1; K05857 phosphatidylinositol phospholipase C, delta [EC:3.1.4.11]	sp|Q39032|PLCD1_ARATH Phosphoinositide phospholipase C 1 OS=Arabidopsis thaliana GN=PLC1 PE=2 SV=1//0
BnaC01g04480D	4.35589	3.25701	42.1002	27.1291	UP	DOWN	FALSE	UP	inositol-tetrakisphosphate 1-kinase 3; K00913 inositol-1,3,4-trisphosphate 5/6-kinase / inositol-tetrakisphosphate 1-kinase [EC:2.7.1.159 2.7.1.134]	sp|O81893|ITPK2_ARATH Inositol-tetrakisphosphate 1-kinase 2 OS=Arabidopsis thaliana GN=ITPK2 PE=1 SV=3//0
BnaC03g07940D	4.85827	1.23615	17.2125	2.32657	UP	DOWN	DOWN	UP	inositol-tetrakisphosphate 1-kinase 1; K00913 inositol-1,3,4-trisphosphate 5/6-kinase / inositol-tetrakisphosphate 1-kinase [EC:2.7.1.159 2.7.1.134]	sp|Q9SBA5|ITPK1_ARATH Inositol-tetrakisphosphate 1-kinase 1 OS=Arabidopsis thaliana GN=ITPK1 PE=1 SV=1//0
BnaA09g06680D	11.7755	11.2028	2.39038	4.88067	DOWN	UP	FALSE	DOWN	SAL1; bifunctional 3'(2'),5'-bisphosphate nucleotidase and inositol polyphosphate 1-phosphatase; K15422 3'(2'), 5'-bisphosphate nucleotidase / inositol polyphosphate 1-phosphatase [EC:3.1.3.7 3.1.3.57]	sp|Q42546|DPNP1_ARATH SAL1 phosphatase OS=Arabidopsis thaliana GN=SAL1 PE=1 SV=1//0
BnaC07g40160D	0.105148	0	1.72844	0.186241	UP	DOWN	FALSE	UP	MIOX4; myo-inositol oxygenase 4; K00469 inositol oxygenase [EC:1.13.99.1]	sp|Q8H1S0|MIOX4_ARATH Inositol oxygenase 4 OS=Arabidopsis thaliana GN=MIOX4 PE=2 SV=1//0

## Sheet: Table S5
Table S5	DEGs related to endomembrane trafficking
Gene_id	WT_group_fpkm	OE_group_fpkm	WT_ABA_group_fpkm	OE_ABA_group_fpkm	significant(OE_ABAvsOE)	significant(OE_ABAvsWT_ABA)	significant(OEvsWT)	significant(WT_ABAvsWT)	KEGG AnnotInfo	Blast swiss prot
BnaA01g04360D	8.86282	9.79631	8.36721	6.159	FALSE	DOWN	FALSE	UP	sec24-like transport protein; K14007 protein transport protein SEC24	sp|Q9M081|SC24B_ARATH Protein transport protein Sec24-like At4g32640 OS=Arabidopsis thaliana GN=At4g32640 PE=2 SV=3//3.33886e-24
BnaA07g13220D	3.22152	3.40375	2.9213	1.97875	FALSE	DOWN	FALSE	FALSE	sec23/sec24 transport family protein	sp|O95487|SC24B_HUMAN Protein transport protein Sec24B OS=Homo sapiens GN=SEC24B PE=1 SV=2//1.99714e-20
BnaA08g17130D	5.87234	6.53303	9.12593	6.92415	UP	DOWN	FALSE	UP	sec23/sec24-like transport protein; K14006 protein transport protein SEC23	sp|Q4PE39|SEC23_USTMA Protein transport protein SEC23 OS=Ustilago maydis (strain 521 / FGSC 9021) GN=SEC23 PE=3 SV=1//0
BnaA09g00370D	11.7608	12.0613	5.62748	4.15866	DOWN	DOWN	FALSE	FALSE	sec23/sec24-like transport protein	sp|Q7SZE5|SC23A_DANRE Protein transport protein Sec23A OS=Danio rerio GN=sec23a PE=2 SV=1//9.92596e-38
BnaC01g05820D	9.15743	9.5382	6.17786	4.5255	FALSE	DOWN	FALSE	FALSE	sec24-like transport protein; K14007 protein transport protein SEC24	sp|Q9M081|SC24B_ARATH Protein transport protein Sec24-like At4g32640 OS=Arabidopsis thaliana GN=At4g32640 PE=2 SV=3//0
BnaC07g17260D	1.49634	1.61634	2.29297	1.30891	FALSE	DOWN	FALSE	UP	sec23/sec24-like transport protein; K14006 protein transport protein SEC23	sp|Q4PE39|SEC23_USTMA Protein transport protein SEC23 OS=Ustilago maydis (strain 521 / FGSC 9021) GN=SEC23 PE=3 SV=1//0
BnaC08g01290D	2.85502	3.09393	4.12653	2.88688	UP	DOWN	FALSE	UP	sec23/sec24-like transport protein; K14006 protein transport protein SEC23	sp|Q4PE39|SEC23_USTMA Protein transport protein SEC23 OS=Ustilago maydis (strain 521 / FGSC 9021) GN=SEC23 PE=3 SV=1//0
BnaCnng33770D	12.6183	7.77824	7.91961	4.15616	FALSE	DOWN	FALSE	FALSE	sec23/sec24-like transport protein; K14006 protein transport protein SEC23	sp|Q4PE39|SEC23_USTMA Protein transport protein SEC23 OS=Ustilago maydis (strain 521 / FGSC 9021) GN=SEC23 PE=3 SV=1//3.01764e-13
BnaA09g50530D	15.2733	19.3282	6.32383	10.8664	FALSE	UP	FALSE	FALSE	SAR1; vesicle-associated membrane protein 722	sp|Q9ZTW3|VA721_ARATH Vesicle-associated membrane protein 721 OS=Arabidopsis thaliana GN=VAMP721 PE=1 SV=1//8.63177e-141

## Sheet: Table S6
Table S6	DEGs related to MAPK cascade
Note	Gene_ID	WT_group_fpkm	OE_group_fpkm	WT_ABA_group_fpkm	OE_ABA_group_fpkm	significant(OE_ABAvsOE)	significant(OE_ABAvsWT_ABA)	significant(OEvsWT)	significant(WT_ABAvsWT)	KEGG AnnotInfo	Blast swiss prot
MAP3K	BnaA03g38420D	3.92147	3.97896	6.02865	5.55081	UP	DOWN	FALSE	UP	MAP3KA; mitogen-activated protein kinase kinase kinase 3	sp|Q9CAD5|YODA_ARATH Mitogen-activated protein kinase kinase kinase YODA OS=Arabidopsis thaliana GN=YDA PE=1 SV=1//5.27924e-127
	BnaC03g45260D	4.31968	4.31267	5.49683	5.08574	UP	DOWN	FALSE	UP	MAP3KA; mitogen-activated protein kinase kinase kinase 3	sp|Q9CAD5|YODA_ARATH Mitogen-activated protein kinase kinase kinase YODA OS=Arabidopsis thaliana GN=YDA PE=1 SV=1//2.47348e-128
	BnaA10g27890D	0.0396794	0.0651102	5.18273	3.84849	UP	DOWN	FALSE	UP	MAPKKK13; mitogen-activated protein kinase kinase kinase 13	sp|P28829|BYR2_SCHPO Protein kinase byr2 OS=Schizosaccharomyces pombe (strain 972 / ATCC 24843) GN=byr2 PE=1 SV=1//1.9779e-17
	BnaA10g29440D	0.0192891	0.127105	0.381453	1.2714	UP	UP	FALSE	UP	MAPKKK13; mitogen-activated protein kinase kinase kinase 13	sp|Q40541|NPK1_TOBAC Mitogen-activated protein kinase kinase kinase NPK1 OS=Nicotiana tabacum GN=NPK1 PE=1 SV=1//1.59559e-46
	BnaC05g04950D	0.0326731	0.0333245	1.35677	2.0721	UP	FALSE	FALSE	UP	MAPKKK13; mitogen-activated protein kinase kinase kinase 13	sp|Q54R82|MKKA_DICDI Mitogen-activated protein kinase kinase kinase A OS=Dictyostelium discoideum GN=mkkA PE=1 SV=2//2.91625e-45
	BnaC09g33900D	0.155618	0.271464	3.90094	4.58842	UP	FALSE	FALSE	UP	MAPKKK13; mitogen-activated protein kinase kinase kinase 13	sp|Q54R82|MKKA_DICDI Mitogen-activated protein kinase kinase kinase A OS=Dictyostelium discoideum GN=mkkA PE=1 SV=2//5.23651e-47
	BnaA05g12320D	1.00506	1.10861	3.92742	4.01903	UP	FALSE	FALSE	UP	MAPKKK14; mitogen-activated protein kinase kinase kinase 14	sp|Q54R82|MKKA_DICDI Mitogen-activated protein kinase kinase kinase A OS=Dictyostelium discoideum GN=mkkA PE=1 SV=2//6.16281e-44
	BnaC03g16550D	0.847696	0.820542	1.16345	1.24909	UP	FALSE	FALSE	UP	MAPKKK14; mitogen-activated protein kinase kinase kinase 14	sp|Q40541|NPK1_TOBAC Mitogen-activated protein kinase kinase kinase NPK1 OS=Nicotiana tabacum GN=NPK1 PE=1 SV=1//1.64806e-44
	BnaC04g14770D	1.48302	1.50392	3.74565	3.99613	UP	FALSE	FALSE	UP	MAPKKK14; mitogen-activated protein kinase kinase kinase 14	sp|Q54R82|MKKA_DICDI Mitogen-activated protein kinase kinase kinase A OS=Dictyostelium discoideum GN=mkkA PE=1 SV=2//1.88996e-45
	BnaC04g40820D	0.87859	0.945851	3.26713	2.84794	UP	DOWN	FALSE	UP	MAPKKK14; mitogen-activated protein kinase kinase kinase 14	sp|Q9CAD5|YODA_ARATH Mitogen-activated protein kinase kinase kinase YODA OS=Arabidopsis thaliana GN=YDA PE=1 SV=1//1.32933e-42
	BnaA02g09290D	0.154974	0.071005	0.388426	0.504368	UP	FALSE	FALSE	UP	MAPKKK15; mitogen-activated protein kinase kinase kinase 15	sp|O22040|ANP1_ARATH Mitogen-activated protein kinase kinase kinase ANP1 OS=Arabidopsis thaliana GN=ANP1 PE=1 SV=2//3.68396e-56
	BnaC02g13360D	0.170722	0.175944	1.44454	1.99332	UP	FALSE	FALSE	UP	MAPKKK15; mitogen-activated protein kinase kinase kinase 15	sp|O22040|ANP1_ARATH Mitogen-activated protein kinase kinase kinase ANP1 OS=Arabidopsis thaliana GN=ANP1 PE=1 SV=2//2.22756e-55
	BnaC09g31820D	0.494536	0.467871	0.418164	0.723711	UP	FALSE	FALSE	FALSE	MAPKKK15; mitogen-activated protein kinase kinase kinase 15	sp|Q9FZ36|M3K2_ARATH Mitogen-activated protein kinase kinase kinase 2 OS=Arabidopsis thaliana GN=ANP2 PE=2 SV=1//2.49885e-52
	BnaCnng64060D	0.322108	0.597262	0.961094	1.1835	UP	FALSE	FALSE	UP	MAPKKK15; mitogen-activated protein kinase kinase kinase 15	sp|O22040|ANP1_ARATH Mitogen-activated protein kinase kinase kinase ANP1 OS=Arabidopsis thaliana GN=ANP1 PE=1 SV=2//1.73447e-53
	BnaA08g14260D	2.35467	1.08906	0.0706091	0.037508	DOWN	FALSE	DOWN	DOWN	MAPKKK16; mitogen-activated protein kinase kinase kinase 16	sp|O22040|ANP1_ARATH Mitogen-activated protein kinase kinase kinase ANP1 OS=Arabidopsis thaliana GN=ANP1 PE=1 SV=2//9.42139e-55
	BnaA04g18840D	0.660365	0.77093	4.37353	4.09915	UP	FALSE	FALSE	UP	MAPKKK17; mitogen-activated protein kinase kinase kinase 17	sp|O22042|M3K3_ARATH Mitogen-activated protein kinase kinase kinase 3 OS=Arabidopsis thaliana GN=ANP3 PE=1 SV=1//2.26821e-49
	BnaA05g10920D	0.501388	0.512668	4.8739	4.42594	UP	FALSE	FALSE	UP	MAPKKK17; mitogen-activated protein kinase kinase kinase 17	sp|Q54R82|MKKA_DICDI Mitogen-activated protein kinase kinase kinase A OS=Dictyostelium discoideum GN=mkkA PE=1 SV=2//3.83867e-52
	BnaC04g12300D	1.00899	1.02265	5.26109	4.94069	UP	FALSE	FALSE	UP	MAPKKK17; mitogen-activated protein kinase kinase kinase 17	sp|Q54R82|MKKA_DICDI Mitogen-activated protein kinase kinase kinase A OS=Dictyostelium discoideum GN=mkkA PE=1 SV=2//1.23732e-53
	BnaCnng21650D	1.93503	1.63049	4.81035	4.02213	UP	DOWN	FALSE	UP	MAPKKK17; mitogen-activated protein kinase kinase kinase 17	sp|Q54R82|MKKA_DICDI Mitogen-activated protein kinase kinase kinase A OS=Dictyostelium discoideum GN=mkkA PE=1 SV=2//4.69339e-54
	BnaAnng12350D	0.989611	1.34201	7.18571	6.62951	UP	DOWN	FALSE	UP	MAPKKK18; mitogen-activated protein kinase kinase kinase 18	sp|Q9FZ36|M3K2_ARATH Mitogen-activated protein kinase kinase kinase 2 OS=Arabidopsis thaliana GN=ANP2 PE=2 SV=1//3.3362e-53
	BnaC05g03130D	0.765576	0.826431	7.01771	6.95886	UP	FALSE	FALSE	UP	MAPKKK18; mitogen-activated protein kinase kinase kinase 18	sp|O22040|ANP1_ARATH Mitogen-activated protein kinase kinase kinase ANP1 OS=Arabidopsis thaliana GN=ANP1 PE=1 SV=2//2.37577e-52
	BnaA07g12140D	0.0673297	0.174077	0.85576	2.37516	UP	UP	FALSE	UP	MAPKKK19; mitogen-activated protein kinase kinase kinase 19	sp|Q9FZ36|M3K2_ARATH Mitogen-activated protein kinase kinase kinase 2 OS=Arabidopsis thaliana GN=ANP2 PE=2 SV=1//1.54785e-44
	BnaC07g16320D	0.0427856	0.023151	1.9555	3.85042	UP	UP	FALSE	UP	MAPKKK19; mitogen-activated protein kinase kinase kinase 19	sp|Q01389|BCK1_YEAST Serine/threonine-protein kinase BCK1/SLK1/SSP31 OS=Saccharomyces cerevisiae (strain ATCC 204508 / S288c) GN=BCK1 PE=1 SV=1//4.32457e-43
	BnaC01g01730D	0.193053	0.0215513	0.387312	1.97267	UP	UP	FALSE	FALSE	MAPKKK21; mitogen-activated protein kinase kinase kinase 21	sp|Q40541|NPK1_TOBAC Mitogen-activated protein kinase kinase kinase NPK1 OS=Nicotiana tabacum GN=NPK1 PE=1 SV=1//4.89765e-34
	BnaA02g34610D	4.24647	4.05916	1.14304	0.477164	DOWN	FALSE	FALSE	DOWN	MAPKKK5; mitogen-activated protein kinase kinase kinase 5	sp|Q9CAD5|YODA_ARATH Mitogen-activated protein kinase kinase kinase YODA OS=Arabidopsis thaliana GN=YDA PE=1 SV=1//1.22364e-32
	BnaA07g12320D	1.6044	1.67238	2.87023	2.62962	UP	FALSE	FALSE	UP	MAPKKK5; mitogen-activated protein kinase kinase kinase 5	sp|Q9CAD5|YODA_ARATH Mitogen-activated protein kinase kinase kinase YODA OS=Arabidopsis thaliana GN=YDA PE=1 SV=1//1.7898e-102
	BnaC04g36900D	1.3096	1.83514	1.8482	1.99202	FALSE	FALSE	FALSE	UP	MAPKKK5; mitogen-activated protein kinase kinase kinase 5	sp|Q9CAD5|YODA_ARATH Mitogen-activated protein kinase kinase kinase YODA OS=Arabidopsis thaliana GN=YDA PE=1 SV=1//3.52237e-49
	BnaC07g16520D	1.932	2.08895	3.14394	3.13414	UP	FALSE	FALSE	UP	MAPKKK5; mitogen-activated protein kinase kinase kinase 5	sp|Q9CAD5|YODA_ARATH Mitogen-activated protein kinase kinase kinase YODA OS=Arabidopsis thaliana GN=YDA PE=1 SV=1//5.8609e-103
	BnaA06g05240D	1.16892	1.45437	0.443402	0.487787	DOWN	FALSE	FALSE	DOWN	NP1; mitogen-activated protein kinase kinase kinase ANP1	sp|O22040|ANP1_ARATH Mitogen-activated protein kinase kinase kinase ANP1 OS=Arabidopsis thaliana GN=ANP1 PE=1 SV=2//0
	BnaC05g06530D	1.31476	1.58837	0.33059	0.530618	DOWN	FALSE	FALSE	DOWN	NP1; mitogen-activated protein kinase kinase kinase ANP1	sp|O22040|ANP1_ARATH Mitogen-activated protein kinase kinase kinase ANP1 OS=Arabidopsis thaliana GN=ANP1 PE=1 SV=2//0
	BnaA05g31260D	2.78377	2.95383	0.856773	1.32507	DOWN	FALSE	FALSE	DOWN	NP3; mitogen-activated protein kinase kinase kinase 3	sp|O22042|M3K3_ARATH Mitogen-activated protein kinase kinase kinase 3 OS=Arabidopsis thaliana GN=ANP3 PE=1 SV=1//0
	BnaA09g20940D	0.263305	0.297593	1.1972	1.19268	UP	FALSE	FALSE	UP	WRKY19; mitogen-activated protein kinase kinase kinase 11	sp|Q9SZ67|WRK19_ARATH Probable WRKY transcription factor 19 OS=Arabidopsis thaliana GN=WRKY19 PE=2 SV=1//0
	BnaA09g21180D	0.35464	0.480153	0.618202	0.829076	UP	FALSE	FALSE	UP	WRKY19; mitogen-activated protein kinase kinase kinase 11	sp|Q9SZ67|WRK19_ARATH Probable WRKY transcription factor 19 OS=Arabidopsis thaliana GN=WRKY19 PE=2 SV=1//2.12698e-93
	BnaA09g21200D	1.34335	1.34934	0.226791	0.265707	DOWN	FALSE	FALSE	DOWN	WRKY19; mitogen-activated protein kinase kinase kinase 11	sp|Q9SZ67|WRK19_ARATH Probable WRKY transcription factor 19 OS=Arabidopsis thaliana GN=WRKY19 PE=2 SV=1//0
	BnaC03g72990D	0.224595	0.289551	0.0107374	0.0643772	FALSE	FALSE	FALSE	DOWN	WRKY19; mitogen-activated protein kinase kinase kinase 11	sp|Q9SZ67|WRK19_ARATH Probable WRKY transcription factor 19 OS=Arabidopsis thaliana GN=WRKY19 PE=2 SV=1//0
	BnaC09g52630D	1.23182	1.1303	2.84336	2.34919	UP	FALSE	FALSE	UP	WRKY19; mitogen-activated protein kinase kinase kinase 11	sp|Q9SZ67|WRK19_ARATH Probable WRKY transcription factor 19 OS=Arabidopsis thaliana GN=WRKY19 PE=2 SV=1//3.2437e-101
	Novel02771	0.877233	1.13413	2.28672	2.25212	UP	FALSE	FALSE	UP	WRKY19; mitogen-activated protein kinase kinase kinase 11	--
	BnaA09g12350D	2.77787	2.78851	1.66068	1.63337	DOWN	FALSE	FALSE	DOWN	YDA; YODA MAPKK kinase	sp|Q9CAD5|YODA_ARATH Mitogen-activated protein kinase kinase kinase YODA OS=Arabidopsis thaliana GN=YDA PE=1 SV=1//0
	BnaC09g12770D	2.8296	2.89866	2.15988	1.8854	DOWN	FALSE	FALSE	FALSE	YDA; YODA MAPKK kinase	sp|Q9CAD5|YODA_ARATH Mitogen-activated protein kinase kinase kinase YODA OS=Arabidopsis thaliana GN=YDA PE=1 SV=1//0
MAP2K	BnaAnng04440D	2.12819	2.29965	3.8039	3.53695	UP	FALSE	FALSE	UP	MEKK1; mitogen-activated protein kinase kinase kinase 1; K13414 mitogen-activated protein kinase kinase kinase 1, plant [EC:2.7.11.25]	sp|Q39008|M3K1_ARATH Mitogen-activated protein kinase kinase kinase 1 OS=Arabidopsis thaliana GN=MEKK1 PE=1 SV=2//0
	BnaAnng30700D	3.23462	3.00575	4.40821	4.35855	UP	FALSE	FALSE	UP	MEKK1; mitogen-activated protein kinase kinase kinase 1; K13414 mitogen-activated protein kinase kinase kinase 1, plant [EC:2.7.11.25]	sp|Q39008|M3K1_ARATH Mitogen-activated protein kinase kinase kinase 1 OS=Arabidopsis thaliana GN=MEKK1 PE=1 SV=2//0
	BnaC03g28150D	2.50687	2.6256	3.59595	3.43516	UP	FALSE	FALSE	UP	MEKK1; mitogen-activated protein kinase kinase kinase 1; K13414 mitogen-activated protein kinase kinase kinase 1, plant [EC:2.7.11.25]	sp|Q39008|M3K1_ARATH Mitogen-activated protein kinase kinase kinase 1 OS=Arabidopsis thaliana GN=MEKK1 PE=1 SV=2//0
	BnaC03g30930D	3.2424	3.32873	1.87411	1.82378	DOWN	FALSE	FALSE	DOWN	MEKK1; mitogen-activated protein kinase kinase kinase 1; K13414 mitogen-activated protein kinase kinase kinase 1, plant [EC:2.7.11.25]	sp|Q39008|M3K1_ARATH Mitogen-activated protein kinase kinase kinase 1 OS=Arabidopsis thaliana GN=MEKK1 PE=1 SV=2//3.8622e-106
	BnaC09g25280D	1.88918	2.05427	2.96508	3.034	UP	FALSE	FALSE	UP	MEKK1; mitogen-activated protein kinase kinase kinase 1; K13414 mitogen-activated protein kinase kinase kinase 1, plant [EC:2.7.11.25]	sp|Q39008|M3K1_ARATH Mitogen-activated protein kinase kinase kinase 1 OS=Arabidopsis thaliana GN=MEKK1 PE=1 SV=2//0
	BnaC01g08650D	3.77705	3.85418	3.65346	3.68532	UP	FALSE	FALSE	UP	MKK2; mitogen-activated protein kinase kinase 2; K04368 mitogen-activated protein kinase kinase 1 [EC:2.7.12.2]	sp|Q9S7U9|M2K2_ARATH Mitogen-activated protein kinase kinase 2 OS=Arabidopsis thaliana GN=MKK2 PE=1 SV=2//0
	BnaA05g15300D	0.234744	0.197332	3.72078	3.66931	UP	FALSE	FALSE	UP	MKK4; mitogen-activated protein kinase kinase 4; K13413 mitogen-activated protein kinase kinase 4/5, plant [EC:2.7.12.2]	sp|O80397|M2K4_ARATH Mitogen-activated protein kinase kinase 4 OS=Arabidopsis thaliana GN=MKK4 PE=1 SV=1//4.61441e-180
	BnaA08g01860D	3.53535	3.54329	5.27904	4.94374	UP	FALSE	FALSE	UP	MKK4; mitogen-activated protein kinase kinase 4; K13413 mitogen-activated protein kinase kinase 4/5, plant [EC:2.7.12.2]	sp|O80397|M2K4_ARATH Mitogen-activated protein kinase kinase 4 OS=Arabidopsis thaliana GN=MKK4 PE=1 SV=1//3.24102e-177
	BnaC03g77890D	3.55884	3.5208	5.2197	4.96503	UP	FALSE	FALSE	UP	MKK4; mitogen-activated protein kinase kinase 4; K13413 mitogen-activated protein kinase kinase 4/5, plant [EC:2.7.12.2]	sp|O80397|M2K4_ARATH Mitogen-activated protein kinase kinase 4 OS=Arabidopsis thaliana GN=MKK4 PE=1 SV=1//1.0006e-171
	BnaC06g08920D	1.51069	1.21503	2.03455	2.01144	UP	FALSE	FALSE	UP	MKK4; mitogen-activated protein kinase kinase 4; K13413 mitogen-activated protein kinase kinase 4/5, plant [EC:2.7.12.2]	sp|O80397|M2K4_ARATH Mitogen-activated protein kinase kinase 4 OS=Arabidopsis thaliana GN=MKK4 PE=1 SV=1//3.05107e-123
	BnaA01g25260D	0.741025	0.806957	3.16996	2.34551	UP	DOWN	FALSE	UP	MKK5; mitogen-activated protein kinase kinase 5; K13413 mitogen-activated protein kinase kinase 4/5, plant [EC:2.7.12.2]	sp|Q8RXG3|M2K5_ARATH Mitogen-activated protein kinase kinase 5 OS=Arabidopsis thaliana GN=MKK5 PE=1 SV=2//0
	BnaA03g36120D	0.554518	0.765457	1.76486	1.93486	UP	FALSE	FALSE	UP	MKK5; mitogen-activated protein kinase kinase 5; K13413 mitogen-activated protein kinase kinase 4/5, plant [EC:2.7.12.2]	sp|Q8RXG3|M2K5_ARATH Mitogen-activated protein kinase kinase 5 OS=Arabidopsis thaliana GN=MKK5 PE=1 SV=2//0
	BnaC03g41990D	1.40105	1.21824	1.65785	1.73847	UP	FALSE	FALSE	UP	MKK5; mitogen-activated protein kinase kinase 5; K13413 mitogen-activated protein kinase kinase 4/5, plant [EC:2.7.12.2]	sp|Q8RXG3|M2K5_ARATH Mitogen-activated protein kinase kinase 5 OS=Arabidopsis thaliana GN=MKK5 PE=1 SV=2//1.07582e-138
	BnaA03g10710D	1.3818	1.42133	1.19237	1.71341	UP	FALSE	FALSE	FALSE	MKK6; mitogen-activated protein kinase kinase 6; K04368 mitogen-activated protein kinase kinase 1 [EC:2.7.12.2]	sp|Q9FJV0|M2K6_ARATH Mitogen-activated protein kinase kinase 6 OS=Arabidopsis thaliana GN=MKK6 PE=1 SV=1//0
	BnaA02g35860D	2.51275	1.22476	6.26293	6.24832	UP	FALSE	DOWN	UP	MKK9; MAP kinase kinase 9	sp|Q9FX43|M2K9_ARATH Mitogen-activated protein kinase kinase 9 OS=Arabidopsis thaliana GN=MKK9 PE=1 SV=1//6.56269e-159
	BnaA07g22640D	3.13127	1.97259	6.2411	6.43837	UP	FALSE	DOWN	UP	MKK9; MAP kinase kinase 9	sp|Q9FX43|M2K9_ARATH Mitogen-activated protein kinase kinase 9 OS=Arabidopsis thaliana GN=MKK9 PE=1 SV=1//0
	BnaC02g22230D	1.65795	1.3362	8.20647	8.27782	UP	FALSE	FALSE	UP	MKK9; MAP kinase kinase 9	sp|Q9FX43|M2K9_ARATH Mitogen-activated protein kinase kinase 9 OS=Arabidopsis thaliana GN=MKK9 PE=1 SV=1//1.57386e-179
	BnaC06g23550D	2.79524	1.81996	5.80875	5.96034	UP	FALSE	DOWN	UP	MKK9; MAP kinase kinase 9	sp|Q9FX43|M2K9_ARATH Mitogen-activated protein kinase kinase 9 OS=Arabidopsis thaliana GN=MKK9 PE=1 SV=1//5.67675e-172
MAPK	BnaA04g03750D	3.06389	3.05566	4.3797	4.2719	UP	FALSE	FALSE	UP	MKP1; mitogen-activated protein kinase phosphatase 1	sp|Q9C5S1|MKP1_ARATH Protein-tyrosine-phosphatase MKP1 OS=Arabidopsis thaliana GN=MKP1 PE=1 SV=1//0
	BnaC04g25620D	3.15964	3.10066	4.59284	4.10231	UP	DOWN	FALSE	UP	MKP1; mitogen-activated protein kinase phosphatase 1	sp|Q9C5S1|MKP1_ARATH Protein-tyrosine-phosphatase MKP1 OS=Arabidopsis thaliana GN=MKP1 PE=1 SV=1//0
	BnaA09g49200D	0.70374	0.818638	0.0226574	0.0239082	DOWN	FALSE	FALSE	DOWN	ATMPK13; mitogen-activated protein kinase 13; K04371 mitogen-activated protein kinase 1/3 [EC:2.7.11.24]	sp|Q9LQQ9|MPK13_ARATH Mitogen-activated protein kinase 13 OS=Arabidopsis thaliana GN=MPK13 PE=1 SV=1//0
	BnaA06g12330D	2.93477	3.00422	3.06633	2.79163	FALSE	FALSE	FALSE	UP	ATMPK8; mitogen-activated protein kinase 8	sp|Q9LM33|MPK8_ARATH Mitogen-activated protein kinase 8 OS=Arabidopsis thaliana GN=MPK8 PE=1 SV=2//0
	BnaA09g44690D	3.57032	3.50272	3.72969	3.33848	UP	DOWN	FALSE	UP	ATMPK8; mitogen-activated protein kinase 8	sp|Q9LM33|MPK8_ARATH Mitogen-activated protein kinase 8 OS=Arabidopsis thaliana GN=MPK8 PE=1 SV=2//0
	BnaC08g37390D	3.83937	3.82879	4.69326	4.26635	UP	DOWN	FALSE	UP	ATMPK8; mitogen-activated protein kinase 8	sp|Q9LM33|MPK8_ARATH Mitogen-activated protein kinase 8 OS=Arabidopsis thaliana GN=MPK8 PE=1 SV=2//0
	Novel00157	1.31573	1.31858	0.137155	0.331365	DOWN	FALSE	FALSE	DOWN	ATMPK8; mitogen-activated protein kinase 8	--
	BnaA06g06010D	1.78011	1.8146	0.850242	1.27559	FALSE	FALSE	FALSE	DOWN	MPK1; mitogen-activated protein kinase 1; K04371 mitogen-activated protein kinase 1/3 [EC:2.7.11.24]	sp|Q39021|MPK1_ARATH Mitogen-activated protein kinase 1 OS=Arabidopsis thaliana GN=MPK1 PE=1 SV=2//0
	BnaC05g07560D	1.58403	1.66785	0.54499	0.728903	DOWN	FALSE	FALSE	DOWN	MPK1; mitogen-activated protein kinase 1; K04371 mitogen-activated protein kinase 1/3 [EC:2.7.11.24]	sp|Q39021|MPK1_ARATH Mitogen-activated protein kinase 1 OS=Arabidopsis thaliana GN=MPK1 PE=1 SV=2//0
	BnaA07g22580D	0.582811	0.536719	0.0440273	0.04265	DOWN	FALSE	FALSE	DOWN	MPK15; mitogen-activated protein kinase 15	sp|Q9C9U4|MPK15_ARATH Mitogen-activated protein kinase 15 OS=Arabidopsis thaliana GN=MPK15 PE=1 SV=3//0
	BnaC06g23500D	0.397893	0.330386	0.014623	0.0312344	DOWN	FALSE	FALSE	DOWN	MPK15; mitogen-activated protein kinase 15	sp|Q9C9U4|MPK15_ARATH Mitogen-activated protein kinase 15 OS=Arabidopsis thaliana GN=MPK15 PE=1 SV=3//0
	BnaA10g16050D	3.09762	2.93882	0.847651	1.16928	DOWN	FALSE	FALSE	DOWN	MPK16; mitogen-activated protein kinase 16	sp|Q8W4J2|MPK16_ARATH Mitogen-activated protein kinase 16 OS=Arabidopsis thaliana GN=MPK16 PE=2 SV=2//0
	BnaAnng22780D	1.20834	1.1621	0.18093	0.214795	DOWN	FALSE	FALSE	DOWN	MPK16; mitogen-activated protein kinase 16	sp|Q8W4J2|MPK16_ARATH Mitogen-activated protein kinase 16 OS=Arabidopsis thaliana GN=MPK16 PE=2 SV=2//0
	BnaC03g09450D	1.96035	2.18863	1.03834	1.41302	FALSE	FALSE	FALSE	DOWN	MPK16; mitogen-activated protein kinase 16	sp|Q8W4J2|MPK16_ARATH Mitogen-activated protein kinase 16 OS=Arabidopsis thaliana GN=MPK16 PE=2 SV=2//0
	BnaC09g38840D	3.32051	3.44678	1.31137	1.61649	DOWN	FALSE	FALSE	DOWN	MPK16; mitogen-activated protein kinase 16	sp|Q8W4J2|MPK16_ARATH Mitogen-activated protein kinase 16 OS=Arabidopsis thaliana GN=MPK16 PE=2 SV=2//0
	Novel00776	1.85516	1.85488	0.814786	0.920189	FALSE	FALSE	FALSE	DOWN	MPK16; mitogen-activated protein kinase 16	--
	BnaC02g47660D	4.13181	4.3604	2.66821	3.57755	FALSE	UP	FALSE	DOWN	MPK17; mitogen-activated protein kinase 17; K00924 [EC:2.7.1.-]	sp|Q84M93|MPK17_ARATH Mitogen-activated protein kinase 17 OS=Arabidopsis thaliana GN=MPK17 PE=2 SV=1//0
	BnaA05g14400D	2.01339	2.08008	3.44191	3.33316	UP	FALSE	FALSE	UP	MPK18; mitogen-activated protein kinase 18	sp|Q9C5C0|MPK18_ARATH Mitogen-activated protein kinase 18 OS=Arabidopsis thaliana GN=MPK18 PE=1 SV=4//0
	BnaC06g06380D	1.56742	1.61312	0.687313	0.708733	DOWN	FALSE	FALSE	DOWN	MPK18; mitogen-activated protein kinase 18	sp|Q9C5C0|MPK18_ARATH Mitogen-activated protein kinase 18 OS=Arabidopsis thaliana GN=MPK18 PE=1 SV=4//0
	BnaCnng35890D	2.45571	2.28504	4.19205	4.21778	UP	FALSE	FALSE	UP	MPK18; mitogen-activated protein kinase 18	sp|Q9C5C0|MPK18_ARATH Mitogen-activated protein kinase 18 OS=Arabidopsis thaliana GN=MPK18 PE=1 SV=4//0
	BnaA01g29230D	3.99635	4.16854	2.56944	2.55956	DOWN	FALSE	FALSE	DOWN	MPK19; mitogen-activated protein kinase 19	sp|Q9LUC3|MPK19_ARATH Mitogen-activated protein kinase 19 OS=Arabidopsis thaliana GN=MPK19 PE=2 SV=2//0
	BnaC01g36660D	4.06107	4.0276	2.68247	2.46862	DOWN	FALSE	FALSE	DOWN	MPK19; mitogen-activated protein kinase 19	sp|Q9LUC3|MPK19_ARATH Mitogen-activated protein kinase 19 OS=Arabidopsis thaliana GN=MPK19 PE=2 SV=2//0
	BnaC05g38860D	3.0284	3.32931	3.6549	3.60778	UP	FALSE	FALSE	UP	MPK19; mitogen-activated protein kinase 19	sp|Q9LUC3|MPK19_ARATH Mitogen-activated protein kinase 19 OS=Arabidopsis thaliana GN=MPK19 PE=2 SV=2//0
	BnaA03g19910D	1.7681	1.73291	0.619839	0.674209	DOWN	FALSE	FALSE	DOWN	MPK20; mitogen-activated protein kinase 20	sp|Q9SJG9|MPK20_ARATH Mitogen-activated protein kinase 20 OS=Arabidopsis thaliana GN=MPK20 PE=1 SV=2//0
	BnaA05g03140D	4.36423	4.08548	4.50705	4.46269	UP	FALSE	FALSE	UP	MPK20; mitogen-activated protein kinase 20	sp|Q9SJG9|MPK20_ARATH Mitogen-activated protein kinase 20 OS=Arabidopsis thaliana GN=MPK20 PE=1 SV=2//0
	BnaC03g23890D	1.41039	1.56137	0.424281	0.409126	DOWN	FALSE	FALSE	DOWN	MPK20; mitogen-activated protein kinase 20	sp|Q9SJG9|MPK20_ARATH Mitogen-activated protein kinase 20 OS=Arabidopsis thaliana GN=MPK20 PE=1 SV=2//0
	BnaCnng35780D	3.61907	3.71087	4.59683	4.45275	UP	FALSE	FALSE	UP	MPK20; mitogen-activated protein kinase 20	sp|Q9SJG9|MPK20_ARATH Mitogen-activated protein kinase 20 OS=Arabidopsis thaliana GN=MPK20 PE=1 SV=2//0
	BnaA06g18440D	3.60618	3.56491	5.20257	5.44779	UP	FALSE	FALSE	UP	MPK3; mitogen-activated protein kinase 3; K04371 mitogen-activated protein kinase 1/3 [EC:2.7.11.24]	sp|Q39023|MPK3_ARATH Mitogen-activated protein kinase 3 OS=Arabidopsis thaliana GN=MPK3 PE=1 SV=2//0
	BnaC03g55440D	3.27168	3.11212	4.46042	4.86746	UP	FALSE	FALSE	UP	MPK3; mitogen-activated protein kinase 3; K04371 mitogen-activated protein kinase 1/3 [EC:2.7.11.24]	sp|Q39023|MPK3_ARATH Mitogen-activated protein kinase 3 OS=Arabidopsis thaliana GN=MPK3 PE=1 SV=2//0
	BnaA03g26950D	3.80462	3.73202	7.12338	7.06064	UP	FALSE	FALSE	UP	MPK4; mitogen-activated protein kinase 4; K04371 mitogen-activated protein kinase 1/3 [EC:2.7.11.24]	sp|Q39024|MPK4_ARATH Mitogen-activated protein kinase 4 OS=Arabidopsis thaliana GN=MPK4 PE=1 SV=2//0
	BnaA05g05340D	2.24362	1.89879	2.42172	2.14999	UP	FALSE	FALSE	UP	MPK4; mitogen-activated protein kinase 4; K04371 mitogen-activated protein kinase 1/3 [EC:2.7.11.24]	sp|Q8GYQ5|MPK12_ARATH Mitogen-activated protein kinase 12 OS=Arabidopsis thaliana GN=MPK12 PE=1 SV=1//0
	BnaC03g31910D	4.3623	4.43943	7.13224	7.21022	UP	FALSE	FALSE	UP	MPK4; mitogen-activated protein kinase 4; K04371 mitogen-activated protein kinase 1/3 [EC:2.7.11.24]	sp|Q39024|MPK4_ARATH Mitogen-activated protein kinase 4 OS=Arabidopsis thaliana GN=MPK4 PE=1 SV=2//0
	BnaC04g04740D	1.77379	1.55847	1.95235	1.77954	UP	FALSE	FALSE	UP	MPK4; mitogen-activated protein kinase 4; K04371 mitogen-activated protein kinase 1/3 [EC:2.7.11.24]	sp|Q8GYQ5|MPK12_ARATH Mitogen-activated protein kinase 12 OS=Arabidopsis thaliana GN=MPK12 PE=1 SV=1//0
	BnaA09g21830D	0.801854	0.756976	2.04699	2.13229	UP	FALSE	FALSE	UP	MPK5; mitogen-activated protein kinase 5; K04371 mitogen-activated protein kinase 1/3 [EC:2.7.11.24]	sp|Q39025|MPK5_ARATH Mitogen-activated protein kinase 5 OS=Arabidopsis thaliana GN=MPK5 PE=2 SV=2//0
	BnaC09g24030D	1.259	1.47585	2.66776	2.51431	UP	FALSE	FALSE	UP	MPK5; mitogen-activated protein kinase 5; K04371 mitogen-activated protein kinase 1/3 [EC:2.7.11.24]	sp|Q39025|MPK5_ARATH Mitogen-activated protein kinase 5 OS=Arabidopsis thaliana GN=MPK5 PE=2 SV=2//0
	BnaA03g20470D	3.30274	3.45405	3.69013	3.52754	UP	FALSE	FALSE	UP	MPK6; MAP kinase 6; K14512 mitogen-activated protein kinase 6 [EC:2.7.11.24]	sp|Q39026|MPK6_ARATH Mitogen-activated protein kinase 6 OS=Arabidopsis thaliana GN=MPK6 PE=1 SV=1//0
	BnaC03g24480D	3.17424	3.4634	4.75134	4.44791	UP	FALSE	FALSE	UP	MPK6; MAP kinase 6; K14512 mitogen-activated protein kinase 6 [EC:2.7.11.24]	sp|Q39026|MPK6_ARATH Mitogen-activated protein kinase 6 OS=Arabidopsis thaliana GN=MPK6 PE=1 SV=1//0
	BnaA07g01930D	3.12224	3.25458	1.45576	1.30934	DOWN	FALSE	FALSE	DOWN	MPK7; mitogen-activated protein kinase 7; K08293 mitogen-activated protein kinase [EC:2.7.11.24]	sp|Q39027|MPK7_ARATH Mitogen-activated protein kinase 7 OS=Arabidopsis thaliana GN=MPK7 PE=1 SV=2//0
	BnaA09g09520D	3.21302	3.36814	3.17043	2.89407	FALSE	FALSE	FALSE	UP	MPK7; mitogen-activated protein kinase 7; K08293 mitogen-activated protein kinase [EC:2.7.11.24]	sp|Q39027|MPK7_ARATH Mitogen-activated protein kinase 7 OS=Arabidopsis thaliana GN=MPK7 PE=1 SV=2//0
	BnaC09g09670D	3.7686	3.81389	4.31049	4.15858	UP	FALSE	FALSE	UP	MPK7; mitogen-activated protein kinase 7; K08293 mitogen-activated protein kinase [EC:2.7.11.24]	sp|Q39027|MPK7_ARATH Mitogen-activated protein kinase 7 OS=Arabidopsis thaliana GN=MPK7 PE=1 SV=2//0
	BnaA05g22170D	3.37702	3.42382	1.69641	1.89032	DOWN	FALSE	FALSE	DOWN	MPK9; mitogen-activated protein kinase 9	sp|Q9LV37|MPK9_ARATH Mitogen-activated protein kinase 9 OS=Arabidopsis thaliana GN=MPK9 PE=2 SV=2//0
	BnaC05g37430D	3.02045	3.1894	4.56102	4.21784	UP	FALSE	FALSE	UP	MPK9; mitogen-activated protein kinase 9	sp|Q9LV37|MPK9_ARATH Mitogen-activated protein kinase 9 OS=Arabidopsis thaliana GN=MPK9 PE=2 SV=2//3.45568e-25
	BnaCnng17720D	3.70167	3.7875	2.33798	2.37224	DOWN	FALSE	FALSE	DOWN	MPK9; mitogen-activated protein kinase 9	sp|Q9LV37|MPK9_ARATH Mitogen-activated protein kinase 9 OS=Arabidopsis thaliana GN=MPK9 PE=2 SV=2//0

## Sheet: Table S7
Table S7	DEGs related to Rboh
Note	Gene_ID	WT_group_fpkm	OE_group_fpkm	WT_ABA_group_fpkm	OE_ABA_group_fpkm	significant(OE_ABAvsOE)	significant(OE_ABAvsWT_ABA)	significant(OEvsWT)	significant(WT_ABAvsWT)	KEGG AnnotInfo	Blast swiss prot
Rboh	BnaA03g13340D	0.061638	0.043799	3.11884	2.86371	UP	FALSE	FALSE	UP	RHD2; Respiratory burst oxidase homolog protein C; K13447 respiratory burst oxidase [EC:1.6.3.- 1.11.1.-]	sp|O81210|RBOHC_ARATH Respiratory burst oxidase homolog protein C OS=Arabidopsis thaliana GN=RBOHC PE=2 SV=2//0
	BnaA06g30520D	1.52399	1.48247	4.87401	4.95402	UP	FALSE	FALSE	UP	RBOHD; respiratory burst oxidase-D; K13447 respiratory burst oxidase [EC:1.6.3.- 1.11.1.-]	sp|Q9FIJ0|RBOHD_ARATH Respiratory burst oxidase homolog protein D OS=Arabidopsis thaliana GN=RBOHD PE=1 SV=1//0
	BnaA09g11870D	1.4913	1.39802	1.85631	1.61137	UP	FALSE	FALSE	UP	RBOH_F; respiratory burst oxidase; K13447 respiratory burst oxidase [EC:1.6.3.- 1.11.1.-]	sp|O48538|RBOHF_ARATH Respiratory burst oxidase homolog protein F OS=Arabidopsis thaliana GN=RBOHF PE=1 SV=1//0
	BnaAnng07990D	3.2844	3.14058	4.5012	4.51056	UP	FALSE	FALSE	UP	RBOHD; respiratory burst oxidase-D; K13447 respiratory burst oxidase [EC:1.6.3.- 1.11.1.-]	sp|Q9FIJ0|RBOHD_ARATH Respiratory burst oxidase homolog protein D OS=Arabidopsis thaliana GN=RBOHD PE=1 SV=1//0
	BnaC02g38300D	4.33899	4.23858	4.77295	4.86948	UP	FALSE	FALSE	UP	RBOHD; respiratory burst oxidase-D; K13447 respiratory burst oxidase [EC:1.6.3.- 1.11.1.-]	sp|Q9FIJ0|RBOHD_ARATH Respiratory burst oxidase homolog protein D OS=Arabidopsis thaliana GN=RBOHD PE=1 SV=1//0
	BnaC03g16150D	0.063771	0.189099	2.47281	1.47399	UP	DOWN	FALSE	UP	RHD2; Respiratory burst oxidase homolog protein C; K13447 respiratory burst oxidase [EC:1.6.3.- 1.11.1.-]	sp|O81210|RBOHC_ARATH Respiratory burst oxidase homolog protein C OS=Arabidopsis thaliana GN=RBOHC PE=2 SV=2//0
	BnaC07g26270D	2.15885	2.16965	5.74831	5.89562	UP	FALSE	FALSE	UP	RBOHD; respiratory burst oxidase-D; K13447 respiratory burst oxidase [EC:1.6.3.- 1.11.1.-]	sp|Q9FIJ0|RBOHD_ARATH Respiratory burst oxidase homolog protein D OS=Arabidopsis thaliana GN=RBOHD PE=1 SV=1//0
	BnaC09g12490D	0.976751	0.93666	2.71031	2.14508	UP	DOWN	FALSE	UP	RBOH_F; respiratory burst oxidase; K13447 respiratory burst oxidase [EC:1.6.3.- 1.11.1.-]	sp|O48538|RBOHF_ARATH Respiratory burst oxidase homolog protein F OS=Arabidopsis thaliana GN=RBOHF PE=1 SV=1//0

## Sheet: Table S8
Table S8	Primers for RT-qPCR
Gene_id	Forward_primer	Reverse_primer
BnaA07g12170D	GAACCAGACCAAGATTTTCCTG	CTGTATTTTCCTCCTTCGTTATC
BnaA07g29770D	TCTTGTCGTCTCGAGCTAGG	GGAAAAATACTCGCCAACGACTC
BnaC06g32970D	TGCAAGCTTTGACGTTTGGG	CGATGAATCCGGGTGTCTGT
BnaC09g49020D	GACGAGATGATACCGGACGAC	TTGCCACTTCCTGAAGGACC
BnaA10g24440D	CCCTGCTGAGTTCTTGCTTGA	GCAAACCAGCCTGCTCATGG
BnaC01g28850D	AGATCGATGAGAACGTGGC	CTGGAAAAAGTATCTTGCCTCATC
β-actin	TGTTCCCTGGAATTGCTGACCGTA	TGCGACCACCTTGATCTTCATGCT
